# Supplementary material
Source: publisher site journal article supplement (https://www.dovepress.com/article/569823)
Supplement: Supplementary file 1 [file 569823%20Supplementary%20Material.docx]

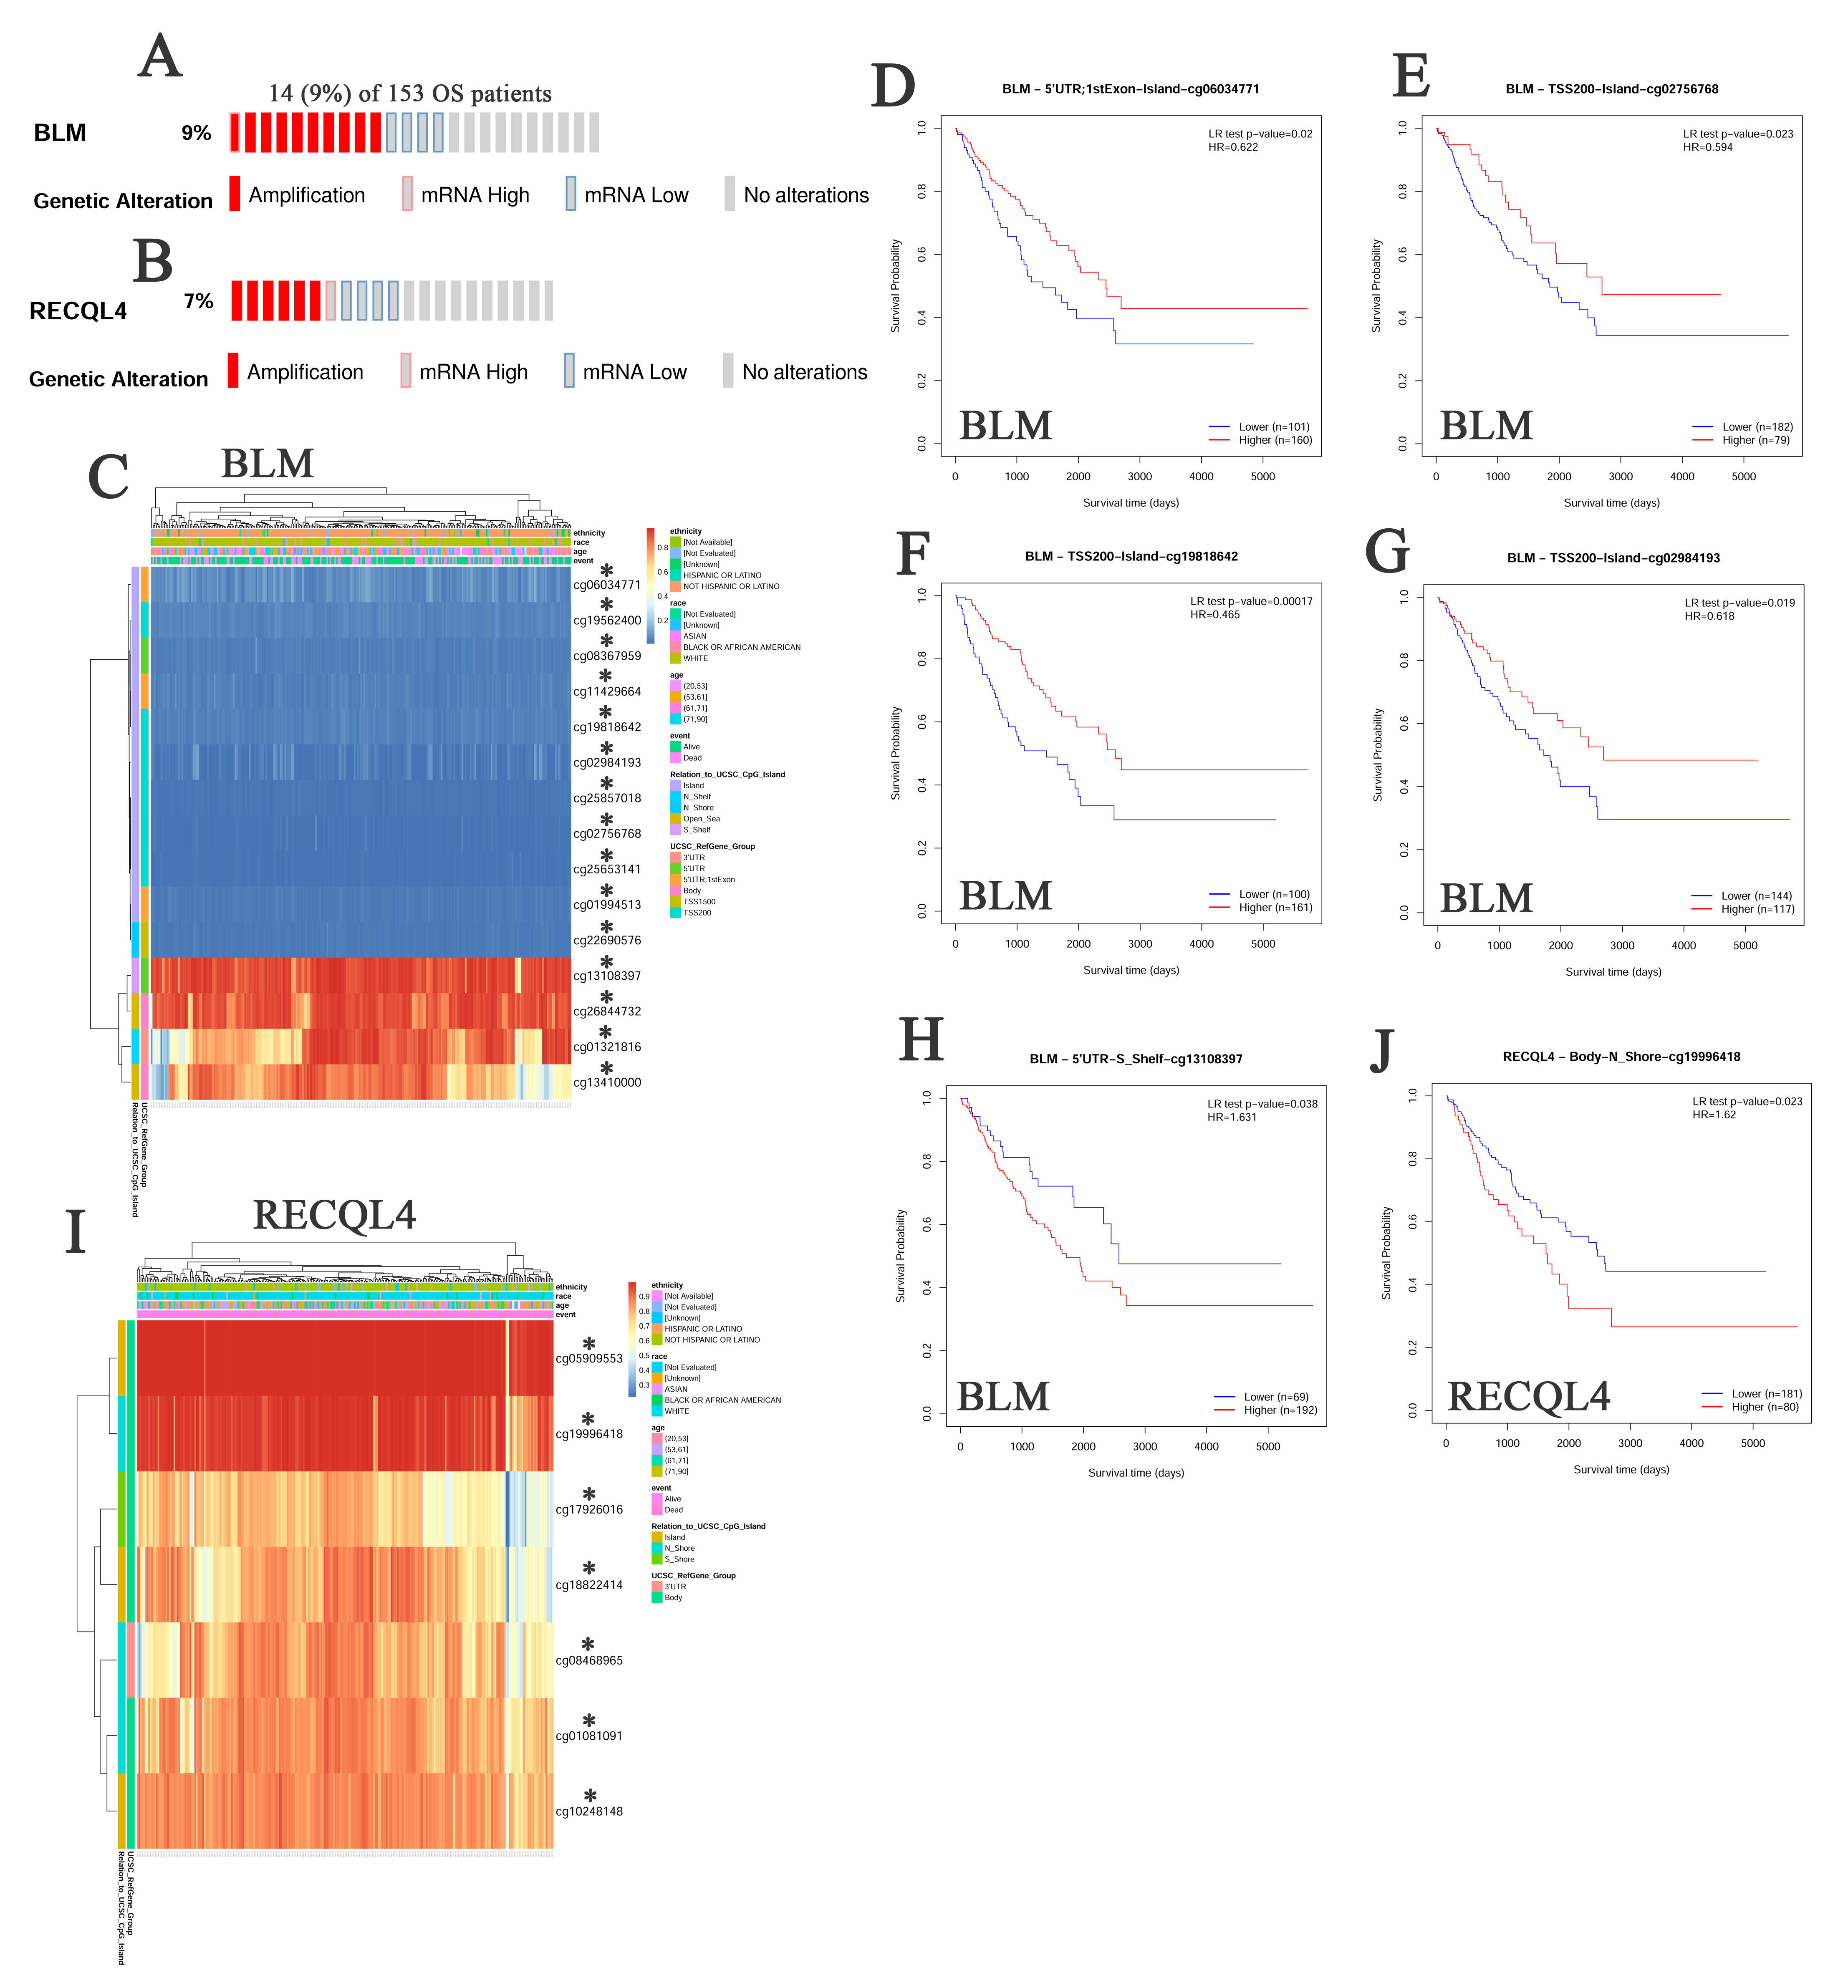


Supplementary Figure 1. Genetic alterations and DNA methylation of *BLM* and *RECQL4* in OS. (A and B) Genetic alterations of *BLM* and *RECQL4* in OS, respectively (cBioportal); (C and I) Heatmap showing the DNA methylation of *BLM* and *RECQL4* at CpG sites, respectively (MethSurv); (D–G) Higher *BLM* methylation of CpG sites (cg06034771, cg02756768, cg19818642, and cg02984193) has a better overall survival than those with lower *BLM* methylation, respectively (MethSurv); (H) Lower *BLM* methylation of CpG sites (cg13108397) has a better overall survival than this with higher *BLM* methylation (MethSurv); (J) Lower *RECQL4* methylation of CpG sites (cg19996418) has a better overall survival than this with higher *RECQL4* methylation (MethSurv); **P* < 0.05.


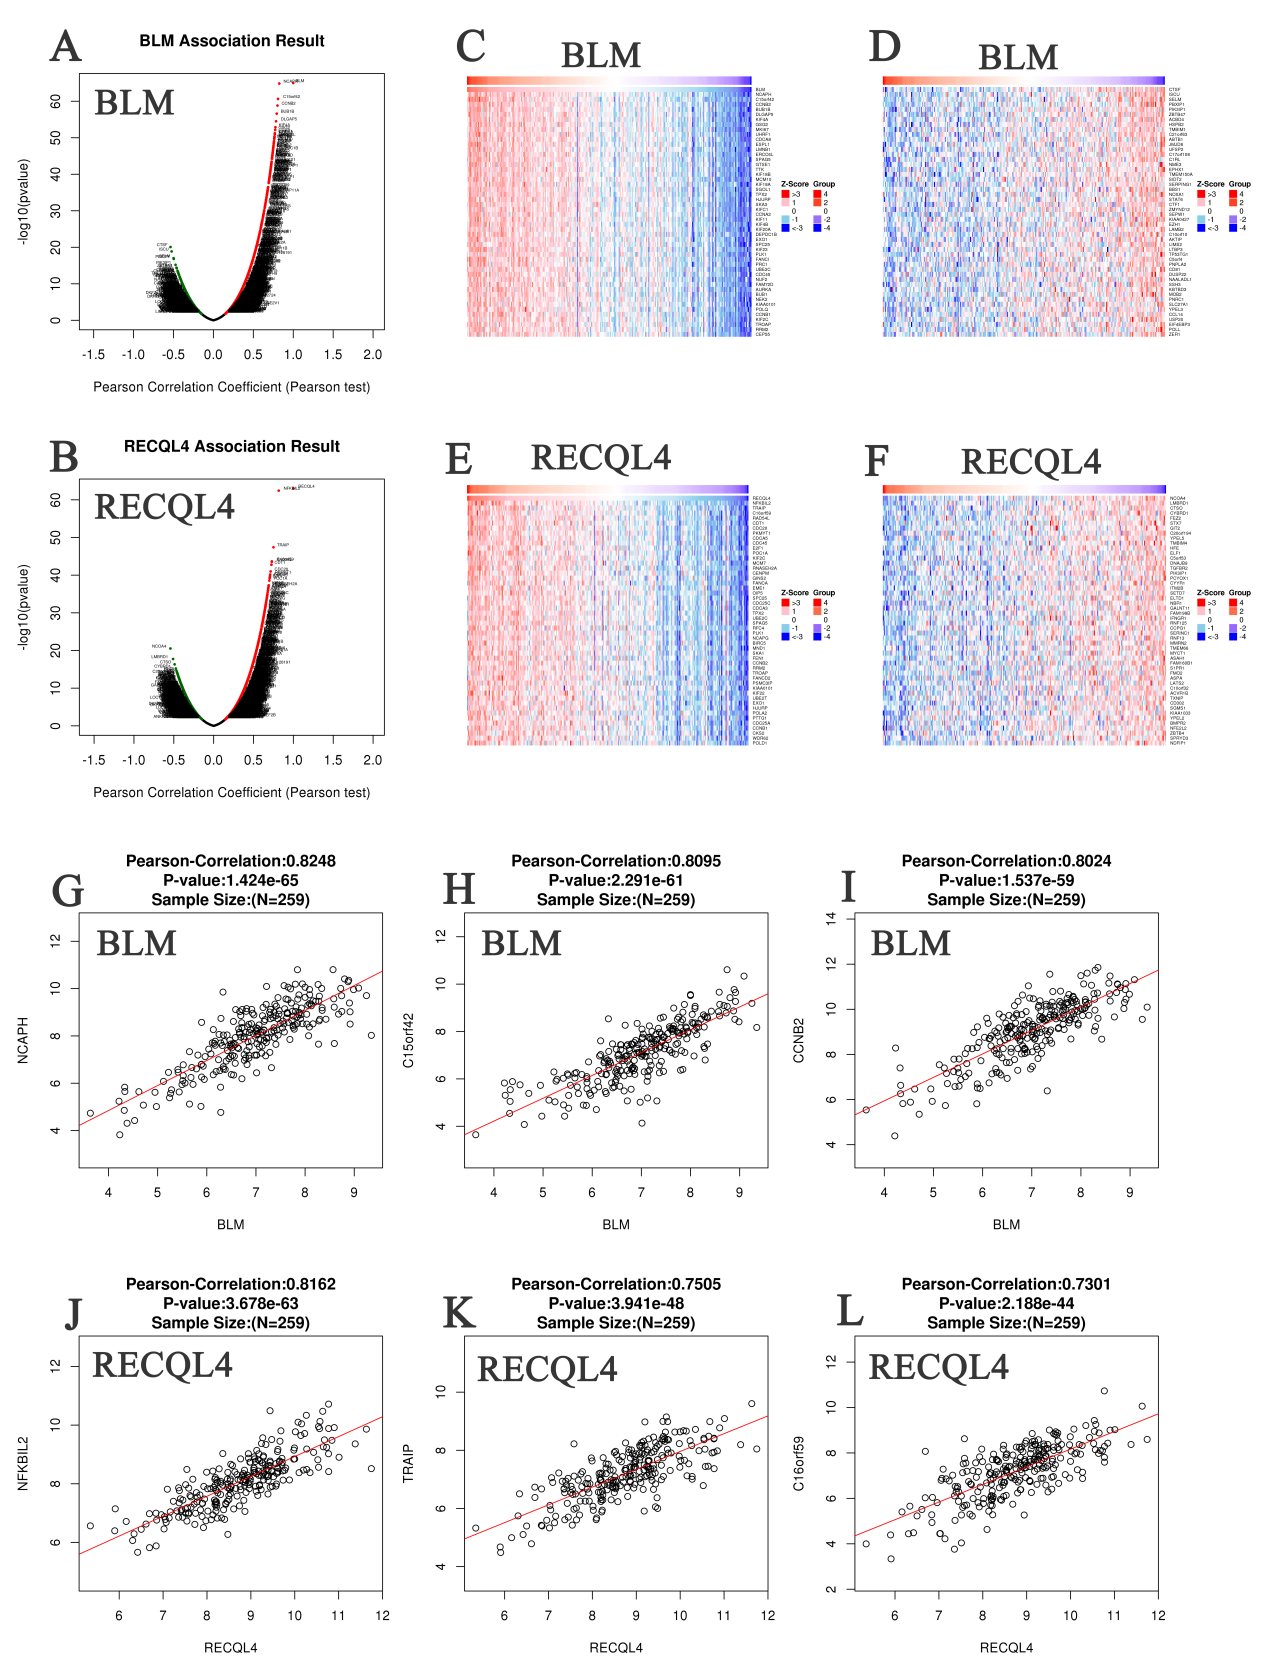


Supplementary Figure 2. Correlations between *BLM*, *RECQL4*, and differentially expressed genes in OS (LinkedOmics). (A and B) Pearson’s test was used to analyze the correlations between *BLM*, *RECQL4*, and the genes that were differentially expressed in OS. (C–F) Heat maps showing the top 50 genes positively and negatively correlated with *BLM* and *RECQL4* in OS. (G–L) Pearson correlation of *BLM* and *RECQL4* expression with the expression of *NCAPH* (G), *C15orf42* (H), *CCNB2* (I), *NFKBIL2* (J), *TRAIP* (K), and *C16orf59* (L) in OS. Red and blue indicate positively and negatively correlated genes, respectively.

Supplementary Table 1. DNA methylation at CpG sites and prognostic value of *BLM* and *RECQL4* in OS

| Gene symbol | CpG name | Hazard Ratio | CI | LR test *p* value | UCSC Ref gene group | Relation to UCSC CpG Island |
| --- | --- | --- | --- | --- | --- | --- |
| *BLM* | cg06034771 | 0.622 | (0.419;0.923) | 0.02 | 5'UTR;1stExon | Island |
|  | cg02756768 | 0.594 | (0.372;0.948) | 0.023 | TSS200 | Island |
|  | cg02984193 | 0.618 | (0.41;0.929) | 0.019 | TSS200 | Island |
|  | cg19818642 | 0.465 | (0.313;0.691) | 0.00017 | TSS200 | Island |
|  | cg13108397 | 1.631 | (1.006;2.642) | 0.038 | 5'UTR | S_Shelf |
| *RECQL4* | cg19996418 | 1.62 | (1.079;2.433) | 0.023 | Body | N_Shore |

Supplementary Table 2. The top 50 of *BLM* neighbor gene alterations in OS (cBioPortal)

| Gene | Altered group | Unaltered group | *p*-Value | |
| --- | --- | --- | --- | --- |
| *CRTC3* | 10 (71.43%) | 0 (0.00%) | < 10-10 | |
| *CRTC3-AS1* | 10 (71.43%) | 0 (0.00%) | < 10-10 | |
| *HSPE1P3* | 10 (71.43%) | 0 (0.00%) | < 10-10 | |
| *IQGAP1* | 10 (71.43%) | 0 (0.00%) | < 10-10 | |
| *LINC01585* | 10 (71.43%) | 0 (0.00%) | < 10-10 | |
| *RN7SL363P* | 10 (71.43%) | 0 (0.00%) | < 10-10 | |
| *NR2F2* | 10 (71.43%) | 3 (2.08%) | 1.33E-10 | |
| *PGAM1P12* | 10 (71.43%) | 3 (2.08%) | 1.33E-10 | |
| *RN7SKP254* | 10 (71.43%) | 3 (2.08%) | 1.33E-10 | |
| *TUBAP12* | 10 (71.43%) | 3 (2.08%) | 1.33E-10 | |
| *DUXAP6* | 9 (64.29%) | 0 (0.00%) | < 10-10 | |
| *FURIN* | 9 (64.29%) | 0 (0.00%) | < 10-10 | |
| *GABARAPL3* | 9 (64.29%) | 0 (0.00%) | < 10-10 | |
| *GDPGP1* | 9 (64.29%) | 0 (0.00%) | < 10-10 | |
| *GOLGA2P8* | 9 (64.29%) | 0 (0.00%) | < 10-10 | |
| *IDH2* | 9 (64.29%) | 0 (0.00%) | < 10-10 | |
| *IDH2-DT* | 9 (64.29%) | 0 (0.00%) | < 10-10 | |
| *NDUFA3P4* | 9 (64.29%) | 0 (0.00%) | < 10-10 | |
| *NGRN* | 9 (64.29%) | 0 (0.00%) | < 10-10 | |
| *NPM1P5* | 9 (64.29%) | 0 (0.00%) | < 10-10 | |
| *PERPP2* | 9 (64.29%) | 0 (0.00%) | < 10-10 | |
| *RN7SL346P* | 9 (64.29%) | 0 (0.00%) | < 10-10 | |
| *RN7SL736P* | 9 (64.29%) | 0 (0.00%) | < 10-10 | |
| *RPS12P26* | 9 (64.29%) | 0 (0.00%) | < 10-10 |
| *SEMA4B* | 9 (64.29%) | 0 (0.00%) | < 10-10 |
| *SLCO3A1* | 9 (64.29%) | 0 (0.00%) | < 10-10 |
| *THRAP3P2* | 9 (64.29%) | 0 (0.00%) | < 10-10 |
| *TTLL13* | 9 (64.29%) | 0 (0.00%) | < 10-10 |
| *ZNF710-AS1* | 9 (64.29%) | 0 (0.00%) | < 10-10 |
| *ZNF774* | 9 (64.29%) | 0 (0.00%) | < 10-10 |
| *ASB9P1* | 9 (64.29%) | 1 (0.69%) | 1.45E-10 |
| *C15ORF32* | 9 (64.29%) | 1 (0.69%) | 1.45E-10 |
| *CHASERR* | 9 (64.29%) | 1 (0.69%) | 1.45E-10 |
| *CHD2* | 9 (64.29%) | 1 (0.69%) | 1.45E-10 |
| *CIB1* | 9 (64.29%) | 1 (0.69%) | 1.45E-10 |
| *ENO1P2* | 9 (64.29%) | 1 (0.69%) | 1.45E-10 |
| *FAM174B* | 9 (64.29%) | 1 (0.69%) | 1.45E-10 |
| *H2AZ2P1* | 9 (64.29%) | 1 (0.69%) | 1.45E-10 |
| *HMGN1P38* | 9 (64.29%) | 1 (0.69%) | 1.45E-10 |
| *LINC00930* | 9 (64.29%) | 1 (0.69%) | 1.45E-10 |
| *RGMA* | 9 (64.29%) | 1 (0.69%) | 1.45E-10 |
| *RPL31P6* | 9 (64.29%) | 1 (0.69%) | 1.45E-10 |
| *YBX2P2* | 9 (64.29%) | 1 (0.69%) | 1.45E-10 |
| *AP3S2* | 8 (57.14%) | 0 (0.00%) | 3.73E-10 |
| *ARPIN* | 8 (57.14%) | 0 (0.00%) | 3.73E-10 |
| *ARPIN-AP3S2* | 8 (57.14%) | 0 (0.00%) | 3.73E-10 |
| *FANCI* | 8 (57.14%) | 0 (0.00%) | 3.73E-10 |
| *FES* | 8 (57.14%) | 0 (0.00%) | 3.73E-10 |
| *HDDC3* | 8 (57.14%) | 0 (0.00%) | 3.73E-10 |
| *HMGB1P8* | 8 (57.14%) | 0 (0.00%) | 3.73E-10 |

Supplementary Table 3. The top 50 of *RECQL4* neighbor gene alterations in OS (cBioPortal)

| Gene | Altered group | Unaltered group | *p*-Value |
| --- | --- | --- | --- |
| *ADCK5* | 6 (54.55%) | 0 (0.00%) | 2.35E-08 |
| *ARHGAP39* | 6 (54.55%) | 0 (0.00%) | 2.35E-08 |
| *C8ORF82* | 6 (54.55%) | 0 (0.00%) | 2.35E-08 |
| *CPSF1* | 6 (54.55%) | 0 (0.00%) | 2.35E-08 |
| *FBXL6* | 6 (54.55%) | 0 (0.00%) | 2.35E-08 |
| *FOXH1* | 6 (54.55%) | 0 (0.00%) | 2.35E-08 |
| *GPT* | 6 (54.55%) | 0 (0.00%) | 2.35E-08 |
| *KIFC2* | 6 (54.55%) | 0 (0.00%) | 2.35E-08 |
| *LRRC14* | 6 (54.55%) | 0 (0.00%) | 2.35E-08 |
| *LRRC24* | 6 (54.55%) | 0 (0.00%) | 2.35E-08 |
| *MFSD3* | 6 (54.55%) | 0 (0.00%) | 2.35E-08 |
| *PPP1R16A* | 6 (54.55%) | 0 (0.00%) | 2.35E-08 |
| *SCRT1* | 6 (54.55%) | 0 (0.00%) | 2.35E-08 |
| *SLC39A4* | 6 (54.55%) | 0 (0.00%) | 2.35E-08 |
| *SLC52A2* | 6 (54.55%) | 0 (0.00%) | 2.35E-08 |
| *TMEM249* | 6 (54.55%) | 0 (0.00%) | 2.35E-08 |
| *TONSL-AS1* | 6 (54.55%) | 0 (0.00%) | 2.35E-08 |
| *VPS28* | 6 (54.55%) | 0 (0.00%) | 2.35E-08 |
| *ZFTRAF1* | 6 (54.55%) | 0 (0.00%) | 2.35E-08 |
| *ASTILCS* | 6 (54.55%) | 1 (0.68%) | 1.60E-07 |
| *BOP1* | 6 (54.55%) | 1 (0.68%) | 1.60E-07 |
| *C8ORF90* | 6 (54.55%) | 1 (0.68%) | 1.60E-07 |
| *CCDC166* | 6 (54.55%) | 1 (0.68%) | 1.60E-07 |
| *COMMD5* | 6 (54.55%) | 1 (0.68%) | 1.60E-07 |
| *CYC1* | 6 (54.55%) | 1 (0.68%) | 1.60E-07 |
| *DGAT1* | 6 (54.55%) | 1 (0.68%) | 1.60E-07 |
| *DNAJC8P3* | 6 (54.55%) | 1 (0.68%) | 1.60E-07 |
| *EEF1D* | 6 (54.55%) | 1 (0.68%) | 1.60E-07 |
| *EPPK1* | 6 (54.55%) | 1 (0.68%) | 1.60E-07 |
| *EXOSC4* | 6 (54.55%) | 1 (0.68%) | 1.60E-07 |
| *FAM83H* | 6 (54.55%) | 1 (0.68%) | 1.60E-07 |
| *GFUS* | 6 (54.55%) | 1 (0.68%) | 1.60E-07 |
| *GPAA1* | 6 (54.55%) | 1 (0.68%) | 1.60E-07 |
| *GPR20* | 6 (54.55%) | 1 (0.68%) | 1.60E-07 |
| *GRINA* | 6 (54.55%) | 1 (0.68%) | 1.60E-07 |
| *GSDMD* | 6 (54.55%) | 1 (0.68%) | 1.60E-07 |
| *HGH1* | 6 (54.55%) | 1 (0.68%) | 1.60E-07 |
| *HNRNPA1P38* | 6 (54.55%) | 1 (0.68%) | 1.60E-07 |
| *HSF1* | 6 (54.55%) | 1 (0.68%) | 1.60E-07 |
| *IQANK1* | 6 (54.55%) | 1 (0.68%) | 1.60E-07 |
| *LINC01300* | 6 (54.55%) | 1 (0.68%) | 1.60E-07 |
| *LINC02878* | 6 (54.55%) | 1 (0.68%) | 1.60E-07 |
| *MAF1* | 6 (54.55%) | 1 (0.68%) | 1.60E-07 |
| *MAPK15* | 6 (54.55%) | 1 (0.68%) | 1.60E-07 |
| *MROH1* | 6 (54.55%) | 1 (0.68%) | 1.60E-07 |
| *MROH5* | 6 (54.55%) | 1 (0.68%) | 1.60E-07 |
| *MROH6* | 6 (54.55%) | 1 (0.68%) | 1.60E-07 |
| *NAPRT* | 6 (54.55%) | 1 (0.68%) | 1.60E-07 |
| *NRBP2* | 6 (54.55%) | 1 (0.68%) | 1.60E-07 |
| *OPLAH* | 6 (54.55%) | 1 (0.68%) | 1.60E-07 |

Supplementary Table 4. The top three miRNA target of *BLM* and *RECQL4* in OS (LinkedOmics).

| Gene | Gene set | Leading Edge Number | *P*-value |
| --- | --- | --- | --- |
| *BLM* | GGATCCG,miR-127 | 4 | <2.2e-16 |
|  | TCCAGAT,miR-516-5P | 21 | <2.2e-16 |
|  | CAGTGTT,MIR-141,miR-200A | 61 | <2.2e-16 |
| *RECQL4* | TTTGCAC,MIR-19A,miR-19B | 178 | <2.2e-16 |
|  | CTTGTAT,miR-381 | 61 | <2.2e-16 |
|  | ACTTTAT,miR-142-5P | 88 | <2.2e-16 |

Supplementary Table 5. The top three kinase target of *BLM* and *RECQL4* in OS (LinkedOmics).

| Gene |  | Kinase target | Description | Leading edge number | *P*-value |
| --- | --- | --- | --- | --- | --- |
| *BLM* |  | Kinase_PLK1 | polo like kinase 1 | 35 | <2.2e-16 |
|  |  | Kinase_CDK1 | cyclin dependent kinase 1 | 83 | <2.2e-16 |
|  |  | Kinase_AURKB | aurora kinase B | 31 | <2.2e-16 |
| *RECQL4* |  | Kinase_CDK1 | cyclin dependent kinase 1 | 80 | <2.2e-16 |
|  |  | Kinase_PLK1 | polo like kinase 1 | 28 | <2.2e-16 |
|  |  | Kinase_CDK2 | cyclin dependent kinase 2 | 87 | <2.2e-16 |

Supplementary Table 6. Pearson’s test was used to analyze the correlations between *BLM* and the genes that were differentially expressed in OS (LinkedOmics).

| Gene | Statistic | *P*-value |
| --- | --- | --- |
| *BLM* | 1.0000000000 | 1E-65 |
| *NCAPH* | 0.824752057745447 | 1.4241E-65 |
| *C15orf42* | 0.809462652014394 | 2.29112E-61 |
| *CCNB2* | 0.802360091750441 | 1.53742E-59 |
| *BUB1B* | 0.793409134943434 | 2.43025E-57 |
| *DLGAP5* | 0.784392149906748 | 3.11442E-55 |
| *KIF4A* | 0.777131414348711 | 1.31281E-53 |
| *GSG2* | 0.773861576461876 | 6.76179E-53 |
| *MKI67* | 0.769634536610149 | 5.40496E-52 |
| *UHRF1* | 0.768996746721257 | 7.36758E-52 |
| *CDCA8* | 0.768175313124665 | 1.09637E-51 |
| *ESPL1* | 0.765305243559459 | 4.34079E-51 |
| *LMNB1* | 0.764747571041466 | 5.65845E-51 |
| *ERCC6L* | 0.76468626947911 | 5.82551E-51 |
| *SPAG5* | 0.763379038321283 | 1.08112E-50 |
| *GTSE1* | 0.762374683256502 | 1.73388E-50 |
| *TTK* | 0.762177794584769 | 1.90159E-50 |
| *KIF18B* | 0.762051267916978 | 2.01773E-50 |
| *MCM10* | 0.758911576845644 | 8.68262E-50 |
| *KIF18A* | 0.757431576218502 | 1.71416E-49 |
| *SGOL1* | 0.757136008724346 | 1.96241E-49 |
| *TPX2* | 0.756338078388662 | 2.82454E-49 |
| *HJURP* | 0.755398519364072 | 4.32908E-49 |
| *SKA3* | 0.752932745842841 | 1.31556E-48 |
| *KIFC1* | 0.752151087967663 | 1.86614E-48 |
| *CCNA2* | 0.750687440206507 | 3.57877E-48 |
| *KIF11* | 0.749874452916374 | 5.12816E-48 |
| *KIF4B* | 0.749118860820497 | 7.15519E-48 |
| *KIF20A* | 0.747892532956016 | 1.22548E-47 |
| *DEPDC1B* | 0.746165526416607 | 2.60087E-47 |
| *EXO1* | 0.743745976049648 | 7.38856E-47 |
| *SPC25* | 0.743182478842071 | 9.40656E-47 |
| *KIF23* | 0.742033301581023 | 1.53622E-46 |
| *PLK1* | 0.740942716000107 | 2.44099E-46 |
| *FANCI* | 0.73910384745748 | 5.30138E-46 |
| *PRC1* | 0.738373663625299 | 7.20025E-46 |
| *UBE2C* | 0.738332431530212 | 7.32558E-46 |
| *CDC45* | 0.736356013672128 | 1.66893E-45 |
| *NUF2* | 0.736269541824533 | 1.72985E-45 |
| *FAM72D* | 0.735396428118161 | 2.48255E-45 |
| *AURKA* | 0.735069268279304 | 2.84135E-45 |
| *BUB1* | 0.73400059282923 | 4.40985E-45 |
| *NEK2* | 0.733354843296451 | 5.74551E-45 |
| *KIAA0101* | 0.728863152141824 | 3.54328E-44 |
| *POLQ* | 0.728117555997668 | 4.77554E-44 |
| *CCNB1* | 0.726911687820114 | 7.72231E-44 |
| *KIF2C* | 0.726712911284649 | 8.35692E-44 |
| *TROAP* | 0.726304286442334 | 9.82788E-44 |
| *RRM2* | 0.725574566326002 | 1.31186E-43 |
| *CEP55* | 0.725357950956407 | 1.42904E-43 |
| *NCAPG* | 0.725289689571704 | 1.46806E-43 |
| *FAM72B* | 0.72500069826057 | 1.64529E-43 |
| *CDC25C* | 0.724655682342315 | 1.88476E-43 |
| *MELK* | 0.723271338501418 | 3.24442E-43 |
| *MAD2L1* | 0.722380590542421 | 4.59364E-43 |
| *KIAA1524* | 0.721655367751946 | 6.09084E-43 |
| *KIF15* | 0.720860440339451 | 8.28949E-43 |
| *CDCA2* | 0.720038853978774 | 1.13862E-42 |
| *RAD51AP1* | 0.719132677074845 | 1.61381E-42 |
| *TRIP13* | 0.717198161117914 | 3.38246E-42 |
| *PLK4* | 0.716284108191946 | 4.78794E-42 |
| *SGOL2* | 0.715331981546311 | 6.86625E-42 |
| *CENPE* | 0.715177850545329 | 7.27788E-42 |
| *ORC1L* | 0.714617086891442 | 8.99203E-42 |
| *CCNF* | 0.712842815084861 | 1.74996E-41 |
| *NUSAP1* | 0.712742745462893 | 1.81666E-41 |
| *TOP2A* | 0.71267100821963 | 1.86601E-41 |
| *SHCBP1* | 0.712223753147353 | 2.20499E-41 |
| *ASPM* | 0.712118507977868 | 2.29322E-41 |
| *CDCA5* | 0.712016424411293 | 2.38213E-41 |
| *FOXM1* | 0.709804925465584 | 5.40853E-41 |
| *ESCO2* | 0.708765070195819 | 7.93178E-41 |
| *CENPF* | 0.70758571993359 | 1.22204E-40 |
| *GINS1* | 0.705071007947457 | 3.04958E-40 |
| *CDK1* | 0.704683637625197 | 3.50789E-40 |
| *C1orf135* | 0.704365921868442 | 3.93408E-40 |
| *ZWILCH* | 0.703637473627762 | 5.1141E-40 |
| *CENPA* | 0.703316257839207 | 5.73978E-40 |
| *ORC6L* | 0.701983454673065 | 9.25047E-40 |
| *EPR1* | 0.700293728144163 | 1.68767E-39 |
| *RACGAP1* | 0.699883959992362 | 1.95135E-39 |
| *PBK* | 0.699760940674884 | 2.03818E-39 |
| *AURKB* | 0.698376099232006 | 3.32215E-39 |
| *CDC20* | 0.695962521678915 | 7.73252E-39 |
| *EME1* | 0.695577147676778 | 8.84234E-39 |
| *FANCD2* | 0.695134507857256 | 1.03123E-38 |
| *C11orf82* | 0.694597525169324 | 1.24226E-38 |
| *HMMR* | 0.693724144766078 | 1.68015E-38 |
| *GINS4* | 0.692556979301273 | 2.5111E-38 |
| *CCDC99* | 0.684868425801754 | 3.38071E-37 |
| *TACC3* | 0.684818242402584 | 3.43766E-37 |
| *STIL* | 0.683981613774134 | 4.53947E-37 |
| *CDC6* | 0.680797561030029 | 1.29673E-36 |
| *KIF20B* | 0.680413395465039 | 1.47048E-36 |
| *KIF14* | 0.679187550994518 | 2.19358E-36 |
| *PKMYT1* | 0.679155775139164 | 2.21638E-36 |
| *CENPN* | 0.678233203120009 | 2.99085E-36 |
| *DEPDC1* | 0.676531072887635 | 5.18412E-36 |
| *CKAP2L* | 0.676515584769808 | 5.21004E-36 |
| *FAM72A* | 0.676489275406883 | 5.25437E-36 |
| *ARHGAP11A* | 0.674647325594368 | 9.4881E-36 |
| *DBF4* | 0.672963437405378 | 1.62252E-35 |
| *OIP5* | 0.672302108932656 | 2.00117E-35 |
| *SMC2* | 0.6716017761339 | 2.49742E-35 |
| *CENPI* | 0.670394015267738 | 3.65419E-35 |
| *CDC25A* | 0.670204534541669 | 3.87841E-35 |
| *RAD51* | 0.669753779333258 | 4.46787E-35 |
| *MYBL2* | 0.668796606001521 | 6.02873E-35 |
| *SKA1* | 0.665134981751166 | 1.87747E-34 |
| *FAM64A* | 0.664175819800491 | 2.52147E-34 |
| *ZWINT* | 0.663722762208712 | 2.89727E-34 |
| *HELLS* | 0.660933306805272 | 6.77882E-34 |
| *RAD54L* | 0.660867511193647 | 6.91535E-34 |
| *C17orf53* | 0.659681883100831 | 9.89673E-34 |
| *CDCA4* | 0.659628729922542 | 1.00567E-33 |
| *BIRC5* | 0.658162101228577 | 1.5632E-33 |
| *E2F8* | 0.654789031399141 | 4.27111E-33 |
| *E2F2* | 0.65172719637982 | 1.05192E-32 |
| *CENPK* | 0.65048713125714 | 1.51089E-32 |
| *CENPO* | 0.647662348843722 | 3.42544E-32 |
| *WDHD1* | 0.647592623936384 | 3.49497E-32 |
| *RAD54B* | 0.647424794552852 | 3.66809E-32 |
| *C15orf23* | 0.644631505723271 | 8.16525E-32 |
| *TIMELESS* | 0.641765765744611 | 1.8398E-31 |
| *CDCA3* | 0.63660055056439 | 7.78522E-31 |
| *C12orf48* | 0.636472560193929 | 8.06574E-31 |
| *FANCB* | 0.634887629330538 | 1.24857E-30 |
| *C14orf145* | 0.634514225564922 | 1.38344E-30 |
| *DNA2* | 0.629953925788741 | 4.78773E-30 |
| *CCDC18* | 0.629952909821713 | 4.78905E-30 |
| *WDR62* | 0.628690984864698 | 6.72772E-30 |
| *ANLN* | 0.628583682262254 | 6.9245E-30 |
| *RCC1* | 0.627434146325829 | 9.42365E-30 |
| *VRK1* | 0.626657395599056 | 1.15967E-29 |
| *XRCC2* | 0.626051349287563 | 1.36291E-29 |
| *CLSPN* | 0.626018893909089 | 1.37473E-29 |
| *CKAP2* | 0.625483797553668 | 1.58492E-29 |
| *RFC3* | 0.623290468102453 | 2.83156E-29 |
| *IQGAP3* | 0.622449620421914 | 3.53275E-29 |
| *CDKN3* | 0.621638113488978 | 4.3709E-29 |
| *PIF1* | 0.620107321105672 | 6.51997E-29 |
| *CASC5* | 0.615625948855831 | 2.07597E-28 |
| *GINS3* | 0.612568928952118 | 4.5262E-28 |
| *E2F7* | 0.611954622741418 | 5.28827E-28 |
| *FAM54A* | 0.611318374920657 | 6.21087E-28 |
| *SPC24* | 0.610789923672725 | 7.0964E-28 |
| *STMN1* | 0.610726537071849 | 7.21064E-28 |
| *CENPM* | 0.610351479917512 | 7.92469E-28 |
| *KPNA2* | 0.607345943657582 | 1.68128E-27 |
| *NDC80* | 0.606988103812042 | 1.83781E-27 |
| *GINS2* | 0.605425178677421 | 2.70762E-27 |
| *RFWD3* | 0.605415911376844 | 2.71383E-27 |
| *LMNB2* | 0.604661346547553 | 3.2696E-27 |
| *FANCA* | 0.603719670561144 | 4.12258E-27 |
| *GEN1* | 0.602927720154911 | 5.00701E-27 |
| *ATAD5* | 0.602355696929353 | 5.75971E-27 |
| *BRCA1* | 0.601729395935475 | 6.71204E-27 |
| *C16orf59* | 0.601162495078963 | 7.7069E-27 |
| *INCENP* | 0.599965349639431 | 1.03097E-26 |
| *CENPH* | 0.597852730957493 | 1.71772E-26 |
| *CHAF1A* | 0.597267613799831 | 1.97728E-26 |
| *MCM4* | 0.596678215794933 | 2.27775E-26 |
| *NEIL3* | 0.595780598588273 | 2.82375E-26 |
| *TMPO* | 0.595280270185566 | 3.18212E-26 |
| *C5orf34* | 0.594523245868882 | 3.81117E-26 |
| *C4orf21* | 0.594071045737967 | 4.2438E-26 |
| *NCAPD2* | 0.59006975896755 | 1.09087E-25 |
| *GMNN* | 0.58474039744605 | 3.75939E-25 |
| *FBXO5* | 0.583385468059858 | 5.13051E-25 |
| *ECT2* | 0.5824993306661 | 6.28262E-25 |
| *PTTG3P* | 0.581475161749914 | 7.93398E-25 |
| *TK1* | 0.57801119179143 | 1.7364E-24 |
| *HNRNPA2B1* | 0.577656132791578 | 1.88056E-24 |
| *DTL* | 0.577647860234138 | 1.88406E-24 |
| *MCM5* | 0.57717275786918 | 2.09593E-24 |
| *CCDC21* | 0.576724411220532 | 2.31731E-24 |
| *RACGAP1P* | 0.576434744444439 | 2.47242E-24 |
| *PTTG1* | 0.57605465880029 | 2.69154E-24 |
| *TDP1* | 0.575803451715829 | 2.84674E-24 |
| *CENPL* | 0.572693545119873 | 5.67603E-24 |
| *CKS2* | 0.571728503867314 | 7.02101E-24 |
| *ASF1B* | 0.570398209317076 | 9.40182E-24 |
| *C1orf112* | 0.568576929289821 | 1.39927E-23 |
| *MND1* | 0.566898787700549 | 2.01406E-23 |
| *TRAIP* | 0.566196235224114 | 2.34436E-23 |
| *WHSC1* | 0.562678188930811 | 4.98801E-23 |
| *RTKN2* | 0.562236061216263 | 5.48101E-23 |
| *PRR11* | 0.558380270416219 | 1.23954E-22 |
| *DCLRE1B* | 0.558078138278169 | 1.3208E-22 |
| *ANKRD32* | 0.55751198154355 | 1.48742E-22 |
| *KIF22* | 0.556982898243898 | 1.66174E-22 |
| *POC1A* | 0.556236237316817 | 1.94241E-22 |
| *CCDC138* | 0.556191893080749 | 1.96048E-22 |
| *SASS6* | 0.553678741028832 | 3.30529E-22 |
| *RAD18* | 0.552787380068561 | 3.97382E-22 |
| *DNMT3B* | 0.55260426042822 | 4.1268E-22 |
| *C6orf167* | 0.551396524583653 | 5.29126E-22 |
| *CDC7* | 0.550471072916994 | 6.39705E-22 |
| *EZH2* | 0.549848937278088 | 7.26513E-22 |
| *CDT1* | 0.549799046450216 | 7.33956E-22 |
| *TOPBP1* | 0.549493824949399 | 7.81152E-22 |
| *TYMS* | 0.549374694025229 | 8.00373E-22 |
| *C20orf72* | 0.545919127526286 | 1.61315E-21 |
| *HMGB3* | 0.54560434584904 | 1.71881E-21 |
| *RNASEH2A* | 0.545508309393325 | 1.75238E-21 |
| *C9orf140* | 0.544973789351033 | 1.95135E-21 |
| *KNTC1* | 0.544346584181137 | 2.21326E-21 |
| *HNRNPR* | 0.543492863732327 | 2.62604E-21 |
| *MCM8* | 0.542180320867731 | 3.41251E-21 |
| *WDR67* | 0.541943077973746 | 3.57754E-21 |
| *C13orf34* | 0.541057799753091 | 4.2656E-21 |
| *NCAPG2* | 0.540287368793612 | 4.96914E-21 |
| *TUBB* | 0.539347465891267 | 5.98325E-21 |
| *SKP2* | 0.538523988012851 | 7.03712E-21 |
| *CTSF* | -0.5374972481 | 8.60943E-21 |
| *DIAPH3* | 0.536123073804254 | 1.12648E-20 |
| *RAET1K* | 0.536091676259901 | 1.1334E-20 |
| *UBE2T* | 0.535959624479142 | 1.16298E-20 |
| *CIT* | 0.535224036793434 | 1.34219E-20 |
| *PRIM1* | 0.534753574982084 | 1.47077E-20 |
| *LIG1* | 0.534135196934874 | 1.65832E-20 |
| *TIPIN* | 0.534126665583865 | 1.66107E-20 |
| *SMC4* | 0.533594752796084 | 1.84136E-20 |
| *DNAJC9* | 0.533394092499805 | 1.91425E-20 |
| *CEP78* | 0.532931516663512 | 2.09327E-20 |
| *RCC2* | 0.532231204234704 | 2.39604E-20 |
| *HIST1H1B* | 0.52992009923273 | 3.73372E-20 |
| *ARHGAP11B* | 0.52673992932919 | 6.83652E-20 |
| *BRCA2* | 0.525334468542622 | 8.91361E-20 |
| *MCM2* | 0.52349602888149 | 1.25882E-19 |
| *ISCU* | -0.5230734394 | 1.36236E-19 |
| *MCM3* | 0.522980916832188 | 1.38612E-19 |
| *HAUS8* | 0.522446361816302 | 1.5316E-19 |
| *CCDC150* | 0.521775456524341 | 1.73555E-19 |
| *GGH* | 0.521262894593136 | 1.90913E-19 |
| *MSH2* | 0.521023343930586 | 1.99599E-19 |
| *MASTL* | 0.520990211483424 | 2.0083E-19 |
| *CENPQ* | 0.520471055934906 | 2.21131E-19 |
| *NFKBIL2* | 0.519370403356536 | 2.71068E-19 |
| *C21orf45* | 0.519240890950475 | 2.77627E-19 |
| *RMI1* | 0.516774981259063 | 4.36848E-19 |
| *POLD1* | 0.516429968653566 | 4.65316E-19 |
| *CHAC2* | 0.516279323027627 | 4.7831E-19 |
| *AURKAPS1* | 0.514892962058422 | 6.15903E-19 |
| *DNMT1* | 0.51455308062269 | 6.55172E-19 |
| *MTBP* | 0.514510755853989 | 6.60231E-19 |
| *TMEM48* | 0.513802866343841 | 7.50756E-19 |
| *LOC100128191* | 0.511197148106642 | 1.20169E-18 |
| *RFC5* | 0.50991298290758 | 1.51298E-18 |
| *SFPQ* | 0.509147486535601 | 1.73487E-18 |
| *FBXO43* | 0.507862106206729 | 2.18138E-18 |
| *RECQL4* | 0.505253683620841 | 3.46167E-18 |
| *UBE2S* | 0.504105476491984 | 4.23669E-18 |
| *BUB3* | 0.503458634954665 | 4.7458E-18 |
| *ACTL6A* | 0.501928978871857 | 6.20069E-18 |
| *XRCC3* | 0.501135752472689 | 7.11922E-18 |
| *SELM* | -0.4994079810 | 9.60655E-18 |
| *PBXIP1* | -0.4965572475 | 1.56921E-17 |
| *C4orf46* | 0.496556204798224 | 1.56949E-17 |
| *ARL6IP1* | 0.496439132887604 | 1.60128E-17 |
| *SUV39H2* | 0.496296109985051 | 1.64098E-17 |
| *SUV39H1* | 0.495839992445479 | 1.77414E-17 |
| *MCM7* | 0.493809321836623 | 2.50746E-17 |
| *FAM40B* | 0.492961663573442 | 2.89505E-17 |
| *G2E3* | 0.492174631874479 | 3.30719E-17 |
| *CSE1L* | 0.491841083380712 | 3.49874E-17 |
| *PCNA* | 0.490858829255653 | 4.12825E-17 |
| *FEN1* | 0.490791165472357 | 4.17549E-17 |
| *TMEM201* | 0.490344363985524 | 4.501E-17 |
| *CHAF1B* | 0.489711059162396 | 5.00538E-17 |
| *POLE2* | 0.488204951228492 | 6.43805E-17 |
| *TTF2* | 0.487531853141221 | 7.20171E-17 |
| *TUBA1B* | 0.486700947595792 | 8.26768E-17 |
| *WDR76* | 0.486469154980145 | 8.59167E-17 |
| *FANCC* | 0.485681105295247 | 9.78904E-17 |
| *CENPJ* | 0.484531272890228 | 1.18346E-16 |
| *SFRS2* | 0.484324231347948 | 1.22451E-16 |
| *SRPK1* | 0.484225802170142 | 1.24451E-16 |
| *TUBA1C* | 0.483441798776574 | 1.41566E-16 |
| *RBL1* | 0.482863347048808 | 1.55652E-16 |
| *FAM96A* | 0.482628780166418 | 1.61748E-16 |
| *CASP2* | 0.482534832254233 | 1.64254E-16 |
| *DDX12* | 0.481722708248766 | 1.87569E-16 |
| *APOBEC3B* | 0.481147280377783 | 2.06022E-16 |
| *LOC729082* | 0.480292793046513 | 2.36749E-16 |
| *CKAP5* | 0.478674598782875 | 3.07725E-16 |
| *SFRS1* | 0.475983924113664 | 4.74441E-16 |
| *TCF19* | 0.475744224109403 | 4.93005E-16 |
| *MTF2* | 0.475138789168032 | 5.43123E-16 |
| *CCNE1* | 0.474746550653742 | 5.78222E-16 |
| *PIK3IP1* | -0.4742029233 | 6.30564E-16 |
| *DDX39* | 0.474072567817534 | 6.4379E-16 |
| *GABPB1* | 0.473808438118567 | 6.71425E-16 |
| *C16orf75* | 0.473654712637671 | 6.88041E-16 |
| *BCL2L12* | 0.472928703255261 | 7.72115E-16 |
| *DBF4B* | 0.472837275652861 | 7.83391E-16 |
| *ELAVL1* | 0.472718995786019 | 7.98219E-16 |
| *CDK2* | 0.4720039161529 | 8.93895E-16 |
| *SCLT1* | 0.470290679794377 | 1.17115E-15 |
| *C18orf54* | 0.469884887098253 | 1.24826E-15 |
| *HIST1H3B* | 0.467491045541162 | 1.81522E-15 |
| *HNRNPL* | 0.464835611549386 | 2.74059E-15 |
| *TAF5* | 0.463527610675126 | 3.35278E-15 |
| *ZBTB47* | -0.4624250014 | 3.97124E-15 |
| *PRPF4* | 0.462143252840898 | 4.14639E-15 |
| *DARS2* | 0.461733423022032 | 4.41473E-15 |
| *CEP152* | 0.460439071611949 | 5.37873E-15 |
| *ACBD4* | -0.4600587416 | 5.69921E-15 |
| *DOT1L* | 0.457768773048443 | 8.06298E-15 |
| *PRIM2* | 0.456694868224523 | 9.47919E-15 |
| *TMEM97* | 0.456442469278714 | 9.84583E-15 |
| *DSN1* | 0.455154796810739 | 1.19433E-14 |
| *CCDC15* | 0.455086949624653 | 1.20651E-14 |
| *H2AFX* | 0.454800274426072 | 1.25937E-14 |
| *MLF1IP* | 0.454732830017676 | 1.27213E-14 |
| *KIF24* | 0.454701646623069 | 1.27807E-14 |
| *EDARADD* | 0.45372785709514 | 1.47793E-14 |
| *CCNE2* | 0.453175245007069 | 1.60462E-14 |
| *E2F1* | 0.453092263913213 | 1.62454E-14 |
| *LRRC59* | 0.452907207665331 | 1.66984E-14 |
| *HIST1H3C* | 0.452419017065061 | 1.79534E-14 |
| *CSTF2* | 0.450549679297717 | 2.367E-14 |
| *ZNF93* | 0.450341051080599 | 2.44091E-14 |
| *NCBP1* | 0.449796554965396 | 2.64459E-14 |
| *HSPB2* | -0.4489720329 | 2.98503E-14 |
| *C14orf143* | 0.448509100562283 | 3.19457E-14 |
| *SMC1A* | 0.448452595243733 | 3.22111E-14 |
| *NCAPD3* | 0.447872470269054 | 3.50639E-14 |
| *NUP62* | 0.447610761487314 | 3.64303E-14 |
| *XPO1* | 0.446881385974576 | 4.0519E-14 |
| *C2orf48* | 0.446625946038503 | 4.20544E-14 |
| *SLC7A5* | 0.446436537133113 | 4.32295E-14 |
| *FAM111B* | 0.446406895810065 | 4.34163E-14 |
| *TMBIM1* | -0.4461459284 | 4.5095E-14 |
| *POLA2* | 0.446001526853487 | 4.60511E-14 |
| *E2F3* | 0.445838477227703 | 4.71544E-14 |
| *PSRC1* | 0.444874029689604 | 5.42288E-14 |
| *SAE1* | 0.444600415958736 | 5.64181E-14 |
| *MED14* | 0.444276782260941 | 5.91192E-14 |
| *C21orf63* | -0.4435320192 | 6.58243E-14 |
| *ITGB3BP* | 0.443247065220957 | 6.85816E-14 |
| *RANBP1* | 0.443151747182659 | 6.95289E-14 |
| *ABTB1* | -0.4427547639 | 7.36136E-14 |
| *JMJD8* | -0.4422213055 | 7.94737E-14 |
| *PPIL5* | 0.442209008435445 | 7.9614E-14 |
| *UFSP2* | -0.4421262663 | 8.05645E-14 |
| *LOC399815* | 0.440866859122686 | 9.64766E-14 |
| *SFRS13A* | 0.440804217621734 | 9.73435E-14 |
| *ZNF131* | 0.439117631559802 | 1.23769E-13 |
| *C17orf108* | -0.4387518399 | 1.30364E-13 |
| *CEP76* | 0.437825984944733 | 1.48628E-13 |
| *ODF2* | 0.437298105227675 | 1.60136E-13 |
| *GPSM2* | 0.434829336013929 | 2.26582E-13 |
| *USP1* | 0.434624451908515 | 2.33174E-13 |
| *DONSON* | 0.434189266315543 | 2.47804E-13 |
| *NUP205* | 0.434021731654797 | 2.53671E-13 |
| *DKC1* | 0.433524822661936 | 2.71884E-13 |
| *ILF2* | 0.433418239622607 | 2.75954E-13 |
| *C1RL* | -0.4330546171 | 2.9029E-13 |
| *NME3* | -0.4318920467 | 3.4118E-13 |
| *EPHX1* | -0.4309149690 | 3.90601E-13 |
| *RHEBL1* | 0.430837499651912 | 3.94806E-13 |
| *MCM6* | 0.430521757009008 | 4.12405E-13 |
| *PSAT1* | 0.430257996554037 | 4.27692E-13 |
| *C9orf100* | 0.429676356721766 | 4.63382E-13 |
| *TMEM150A* | -0.4292541511 | 4.91094E-13 |
| *SNRPA1* | 0.428747125927659 | 5.26516E-13 |
| *MYLK2* | 0.428501932034747 | 5.44528E-13 |
| *MPHOSPH9* | 0.427816697187765 | 5.98116E-13 |
| *FANCM* | 0.427087916713477 | 6.60754E-13 |
| *NASP* | 0.426582860203184 | 7.07873E-13 |
| *CBFB* | 0.426220438379628 | 7.43689E-13 |
| *DHFR* | 0.425180192185141 | 8.56597E-13 |
| *CABLES2* | 0.42453652759977 | 9.34661E-13 |
| *NUP50* | 0.424507286858332 | 9.38368E-13 |
| *GNL2* | 0.423775431523433 | 1.03595E-12 |
| *CEP110* | 0.422404254274777 | 1.24612E-12 |
| *HMGB2* | 0.422199999382679 | 1.28079E-12 |
| *CEP135* | 0.422062634570996 | 1.30463E-12 |
| *KPNB1* | 0.421894395663347 | 1.33443E-12 |
| *RFC2* | 0.421875616776656 | 1.33779E-12 |
| *NRAS* | 0.421351214742929 | 1.43523E-12 |
| *SIDT2* | -0.4212753806 | 1.44988E-12 |
| *HMGN2* | 0.421258389036234 | 1.45318E-12 |
| *NUP155* | 0.4209487001 | 1.51467E-12 |
| *SIPA1L3* | 0.420780974492783 | 1.54903E-12 |
| *SERPING1* | -0.4206551174 | 1.57531E-12 |
| *BBS1* | -0.4203332900 | 1.6445E-12 |
| *NOXA1* | -0.4201997555 | 1.67407E-12 |
| *STAT6* | -0.4200425965 | 1.70953E-12 |
| *CTF1* | -0.4198431764 | 1.75559E-12 |
| *ZMYND12* | -0.4188725642 | 1.99762E-12 |
| *ZNF530* | 0.417995643314784 | 2.24406E-12 |
| *SEPW1* | -0.4172545710 | 2.47522E-12 |
| *ZNF695* | 0.417157530874192 | 2.50716E-12 |
| *PPAT* | 0.417146211691032 | 2.51091E-12 |
| *ATAD2* | 0.416861105077724 | 2.60723E-12 |
| *PDSS1* | 0.416734570071345 | 2.65112E-12 |
| *THAP10* | 0.41670267226898 | 2.6623E-12 |
| *HN1* | 0.416640045809736 | 2.68438E-12 |
| *DDX11* | 0.416515762162397 | 2.72873E-12 |
| *RFC4* | 0.416177495212808 | 2.85308E-12 |
| *KIAA0427* | -0.4155872874 | 3.08341E-12 |
| *MXD3* | 0.414100253241468 | 3.74705E-12 |
| *PASK* | 0.414035686173484 | 3.77881E-12 |
| *KIF2A* | 0.413765407262261 | 3.91467E-12 |
| *DCAF15* | 0.41329650074915 | 4.16173E-12 |
| *EZH1* | -0.4132253322 | 4.20053E-12 |
| *PSMD12* | 0.413168227723955 | 4.23192E-12 |
| *SFXN1* | 0.412715907351796 | 4.48877E-12 |
| *LAMB2* | -0.4126196581 | 4.54535E-12 |
| *CHTF18* | 0.412510341848948 | 4.61045E-12 |
| *HAS2* | 0.41143595512057 | 5.30066E-12 |
| *C10orf10* | -0.4114079819 | 5.31991E-12 |
| *BEND3* | 0.410902329105808 | 5.67991E-12 |
| *AKTIP* | -0.4107420564 | 5.79889E-12 |
| *LIMS2* | -0.4099082923 | 6.45812E-12 |
| *DOLPP1* | 0.409478869620961 | 6.82557E-12 |
| *YRDC* | 0.409408443057942 | 6.88775E-12 |
| *PDE7A* | 0.408187273880827 | 8.05783E-12 |
| *PLAGL2* | 0.407955516837577 | 8.30078E-12 |
| *CDCA7* | 0.40768972344816 | 8.5882E-12 |
| *LTBP3* | -0.4074507598 | 8.85487E-12 |
| *LCORL* | 0.406075234749102 | 1.0554E-11 |
| *TP53TG1* | -0.4057650685 | 1.0979E-11 |
| *NUP188* | 0.405699621579743 | 1.10707E-11 |
| *RRM1* | 0.405638115195265 | 1.11576E-11 |
| *ARL6IP6* | 0.40540375245975 | 1.1495E-11 |
| *C5orf4* | -0.4050593701 | 1.20087E-11 |
| *C13orf37* | 0.404518978535071 | 1.28603E-11 |
| *CKS1B* | 0.404386209799548 | 1.30784E-11 |
| *DIAPH1* | 0.403946627520814 | 1.38263E-11 |
| *ANP32E* | 0.403857207110745 | 1.39835E-11 |
| *HIST1H2BH* | 0.403451240076954 | 1.47192E-11 |
| *ILF3* | 0.403194586170675 | 1.52036E-11 |
| *GMEB1* | 0.403123175673474 | 1.53411E-11 |
| *PNPLA2* | -0.4029841388 | 1.56124E-11 |
| *HIST1H2AL* | 0.402899433012954 | 1.57799E-11 |
| *C14orf80* | 0.401481241475545 | 1.88589E-11 |
| *CD81* | -0.4014658757 | 1.88953E-11 |
| *HAUS2* | 0.401231608174359 | 1.94583E-11 |
| *DUSP22* | -0.4007495612 | 2.06687E-11 |
| *U2AF2* | 0.400321583028043 | 2.18044E-11 |
| *GATAD2A* | 0.400025038091705 | 2.26268E-11 |
| *PARP1* | 0.399768315524348 | 2.3363E-11 |
| *MNS1* | 0.399635712112657 | 2.37524E-11 |
| *THOC3* | 0.399620634887303 | 2.37971E-11 |
| *NAALADL1* | -0.3994152494 | 2.44138E-11 |
| *CDK5R1* | 0.398610123947928 | 2.69848E-11 |
| *HNRNPAB* | 0.398282239468443 | 2.81057E-11 |
| *C19orf40* | 0.398187957061486 | 2.84363E-11 |
| *IPPK* | 0.397988338639061 | 2.91488E-11 |
| *RELT* | 0.397962550817295 | 2.92421E-11 |
| *PARP2* | 0.397229644062222 | 3.20188E-11 |
| *TARDBP* | 0.397142306636868 | 3.23663E-11 |
| *FAM83D* | 0.396769430601231 | 3.38917E-11 |
| *POLE* | 0.395868796755411 | 3.78703E-11 |
| *LIN54* | 0.395159058927196 | 4.13223E-11 |
| *IGF2BP3* | 0.394920697395504 | 4.25489E-11 |
| *SSH3* | -0.3948140307 | 4.31091E-11 |
| *MAD2L2* | 0.394434668312307 | 4.51606E-11 |
| *SSRP1* | 0.39439645078774 | 4.53724E-11 |
| *BRIP1* | 0.394372584273969 | 4.55052E-11 |
| *NUP153* | 0.394292834396998 | 4.59517E-11 |
| *SFRS3* | 0.394285977010172 | 4.59902E-11 |
| *GLMN* | 0.394114980104675 | 4.69627E-11 |
| *SENP1* | 0.393905765466421 | 4.81798E-11 |
| *RAD21* | 0.393870861179746 | 4.83858E-11 |
| *FIGNL1* | 0.39314996870276 | 5.28374E-11 |
| *GPRIN1* | 0.392888053806334 | 5.45514E-11 |
| *DSCC1* | 0.39251370232222 | 5.70953E-11 |
| *CHEK1* | 0.392493607429723 | 5.72351E-11 |
| *TRIM59* | 0.391965042712674 | 6.10334E-11 |
| *MTHFD1* | 0.391958682805071 | 6.10806E-11 |
| *NUP93* | 0.391872191545329 | 6.17255E-11 |
| *TCERG1* | 0.391402079592189 | 6.53484E-11 |
| *KBTBD3* | -0.3910623515 | 6.80943E-11 |
| *MOB2* | -0.3906260339 | 7.17858E-11 |
| *G3BP1* | 0.388849367418057 | 8.89312E-11 |
| *PNRC1* | -0.3879718883 | 9.88072E-11 |
| *LIN9* | 0.387813381139178 | 1.00701E-10 |
| *NONO* | 0.387770335459062 | 1.01222E-10 |
| *CCDC77* | 0.387741443027928 | 1.01573E-10 |
| *SLC27A1* | -0.3876385638 | 1.02831E-10 |
| *DEK* | 0.387635018904676 | 1.02875E-10 |
| *YPEL3* | -0.3869695519 | 1.11395E-10 |
| *TOP3A* | 0.386571780211682 | 1.16811E-10 |
| *TMOD3* | 0.38648428704322 | 1.18036E-10 |
| *RAN* | 0.386287620476334 | 1.20836E-10 |
| *CAPZA1* | 0.386168182866196 | 1.22567E-10 |
| *ULBP1* | 0.386067555222458 | 1.24045E-10 |
| *H2AFV* | 0.386030876608663 | 1.24588E-10 |
| *GAS2L3* | 0.385279120433082 | 1.36237E-10 |
| *CCL14* | -0.3851944403 | 1.37614E-10 |
| *SNRNP40* | 0.384681019533595 | 1.46254E-10 |
| *PHACTR4* | 0.384664445733848 | 1.46542E-10 |
| *WDR4* | 0.384353544750327 | 1.52039E-10 |
| *CDC5L* | 0.383904245013698 | 1.60338E-10 |
| *SLC25A15* | 0.382882153548242 | 1.80889E-10 |
| *H2AFY* | 0.382739313269884 | 1.83958E-10 |
| *CEP72* | 0.382578984362054 | 1.87462E-10 |
| *C15orf21* | 0.382266185703315 | 1.94487E-10 |
| *C14orf106* | 0.382144898524087 | 1.97279E-10 |
| *USP20* | -0.3820216940 | 2.00155E-10 |
| *EIF4EBP3* | -0.3816572490 | 2.08903E-10 |
| *CDK16* | 0.381511346129773 | 2.12508E-10 |
| *C9orf80* | 0.381162986132682 | 2.21362E-10 |
| *POLL* | -0.3811438575 | 2.21859E-10 |
| *ZER1* | -0.3809847167 | 2.26031E-10 |
| *ARNTL2* | 0.380643057427288 | 2.35247E-10 |
| *RANGAP1* | 0.380332150574537 | 2.43949E-10 |
| *PLCD1* | -0.3801059256 | 2.50477E-10 |
| *CALCOCO1* | -0.3800950286 | 2.50796E-10 |
| *NANP* | 0.379869214284893 | 2.5749E-10 |
| *C10orf116* | -0.3793808499 | 2.72564E-10 |
| *FGFR1OP* | 0.378998539490073 | 2.84959E-10 |
| *ZNF643* | 0.378668884337662 | 2.96085E-10 |
| *FAM105B* | 0.378611913554055 | 2.9805E-10 |
| *PFAS* | 0.378369851269801 | 3.06541E-10 |
| *PPIL1* | 0.378255174787254 | 3.10646E-10 |
| *CYBRD1* | -0.3782470454 | 3.10939E-10 |
| *NUPL1* | 0.378224669154256 | 3.11747E-10 |
| *EPT1* | 0.377463699841782 | 3.40463E-10 |
| *HMGCR* | 0.377437287812032 | 3.41505E-10 |
| *HNRNPH1* | 0.377343910303357 | 3.45212E-10 |
| *PDIK1L* | 0.377294842389479 | 3.47175E-10 |
| *C11orf84* | 0.377190965574874 | 3.51368E-10 |
| *VPS11* | -0.3770494912 | 3.57157E-10 |
| *GMPS* | 0.376911111932842 | 3.62909E-10 |
| *CCDC69* | -0.3768753983 | 3.64408E-10 |
| *NIN* | 0.376787989799174 | 3.68102E-10 |
| *PTBP1* | 0.376716378476765 | 3.71156E-10 |
| *C5orf53* | -0.3765769245 | 3.77173E-10 |
| *TBC1D17* | -0.3762212944 | 3.92951E-10 |
| *SPATA5* | 0.375555085510467 | 4.24247E-10 |
| *TFDP1* | 0.375345917440671 | 4.34563E-10 |
| *RCOR1* | 0.375044975024872 | 4.49833E-10 |
| *HIST1H3J* | 0.374929800152278 | 4.55813E-10 |
| *EYA3* | 0.374723187071416 | 4.66736E-10 |
| *APEX2* | 0.374539415595353 | 4.76664E-10 |
| *RPA3* | 0.37406940927106 | 5.02998E-10 |
| *TARS* | 0.37404242304474 | 5.04552E-10 |
| *DR1* | 0.374036958318159 | 5.04867E-10 |
| *MSH6* | 0.373347309319482 | 5.46226E-10 |
| *XPO5* | 0.373258906105251 | 5.51759E-10 |
| *SPRYD3* | -0.3731117381 | 5.61092E-10 |
| *KCTD5* | 0.372724337774805 | 5.86398E-10 |
| *C11orf2* | -0.3726303307 | 5.92703E-10 |
| *ZDHHC18* | 0.372426614415435 | 6.06594E-10 |
| *LEO1* | 0.372171405575702 | 6.24442E-10 |
| *CHSY1* | 0.372085352583961 | 6.30574E-10 |
| *GSTCD* | 0.371738194148774 | 6.55912E-10 |
| *PNPLA7* | -0.3716986213 | 6.58862E-10 |
| *LRRC40* | 0.371657048679866 | 6.61975E-10 |
| *TMSB15A* | 0.371582446305523 | 6.67597E-10 |
| *OTX1* | 0.371555140095684 | 6.69666E-10 |
| *EXOSC10* | 0.371527507108225 | 6.71767E-10 |
| *GTPBP3* | 0.371423772538912 | 6.7971E-10 |
| *C21orf58* | 0.371263053991531 | 6.92195E-10 |
| *CDC25B* | 0.371080765059093 | 7.06626E-10 |
| *PATL1* | 0.37105442607994 | 7.08735E-10 |
| *UNG* | 0.371053050872602 | 7.08846E-10 |
| *CBX3* | 0.370556194496624 | 7.498E-10 |
| *SKA2* | 0.370527031630452 | 7.52274E-10 |
| *PPP1R8* | 0.370472142689191 | 7.56952E-10 |
| *MTOR* | 0.370322804338065 | 7.69822E-10 |
| *LZIC* | 0.370311982689767 | 7.70762E-10 |
| *FAM160B2* | -0.3701488583 | 7.8508E-10 |
| *ZNF714* | 0.370148721269607 | 7.85092E-10 |
| *UBR7* | 0.370000311907988 | 7.98341E-10 |
| *HAUS6* | 0.369985573487738 | 7.99669E-10 |
| *ULBP2* | 0.369755251924401 | 8.20696E-10 |
| *C9orf9* | -0.3697407785 | 8.22035E-10 |
| *SAMD1* | 0.369376834748232 | 8.56412E-10 |
| *CBX7* | -0.3689026611 | 9.03297E-10 |
| *AG2* | -0.3688285577 | 9.10846E-10 |
| *EFTUD2* | 0.36876828021301 | 9.17031E-10 |
| *HNRNPM* | 0.368644158860798 | 9.29896E-10 |
| *RHOB* | -0.3685421175 | 9.40603E-10 |
| *KIAA0406* | 0.368370880457739 | 9.5884E-10 |
| *INPP5A* | -0.3677410236 | 1.02892E-09 |
| *BRPF1* | 0.367727178201295 | 1.03051E-09 |
| *CTDSPL2* | 0.367484080684489 | 1.05891E-09 |
| *RBM15* | 0.367457667179951 | 1.06204E-09 |
| *NRM* | 0.367282544865967 | 1.08302E-09 |
| *LOC341056* | 0.366624521508003 | 1.16552E-09 |
| *GPR19* | 0.366587602836802 | 1.17033E-09 |
| *GHDC* | -0.3663670616 | 1.19943E-09 |
| *ZDHHC13* | 0.36608463584392 | 1.23773E-09 |
| *PAK4* | 0.365994419324278 | 1.25021E-09 |
| *ERI1* | 0.365370641861825 | 1.33991E-09 |
| *ORAI3* | -0.3653023584 | 1.3501E-09 |
| *HAUS3* | 0.36506190992066 | 1.38658E-09 |
| *HIST1H3F* | 0.364955600074971 | 1.40302E-09 |
| *CTDSP1* | -0.3642704999 | 1.51353E-09 |
| *FBXO45* | 0.364043810593144 | 1.55193E-09 |
| *CTSO* | -0.3639154061 | 1.57409E-09 |
| *TPRG1L* | -0.3637221991 | 1.60802E-09 |
| *ZNF326* | 0.363461404202275 | 1.65494E-09 |
| *ALG10* | 0.363312851788018 | 1.68225E-09 |
| *NXT2* | 0.363284637512684 | 1.68749E-09 |
| *SYS1* | -0.3632838483 | 1.68764E-09 |
| *ZNF92* | 0.363137376847832 | 1.71508E-09 |
| *APAF1* | 0.363045937915963 | 1.73244E-09 |
| *CENPP* | 0.362835249105744 | 1.77307E-09 |
| *ZNF184* | 0.362480725167038 | 1.84354E-09 |
| *MYL9* | -0.3624194145 | 1.85599E-09 |
| *CSNK1G1* | 0.362188797151039 | 1.90359E-09 |
| *C13orf23* | 0.361977792769188 | 1.94817E-09 |
| *ZNF138* | 0.361797343928448 | 1.9871E-09 |
| *GAS6* | -0.3616959317 | 2.0093E-09 |
| *GPR3* | 0.361626009886825 | 2.02476E-09 |
| *PDXP* | 0.361448549108394 | 2.06449E-09 |
| *CCDC34* | 0.361294166161276 | 2.09967E-09 |
| *GLO1* | 0.361238579473795 | 2.11247E-09 |
| *CCS* | -0.3611895807 | 2.12383E-09 |
| *CRTAP* | -0.3611881717 | 2.12415E-09 |
| *AMMECR1* | 0.361041172393669 | 2.15857E-09 |
| *MDC1* | 0.361030536906748 | 2.16108E-09 |
| *TNFRSF13C* | 0.360950076758378 | 2.18017E-09 |
| *HPRT1* | 0.360861306938317 | 2.20142E-09 |
| *ZNF688* | -0.3608399271 | 2.20657E-09 |
| *NUP85* | 0.360485703330736 | 2.29358E-09 |
| *ZBTB4* | -0.3604812707 | 2.29469E-09 |
| *C14orf28* | -0.3604183773 | 2.31048E-09 |
| *EXOSC3* | 0.360223646241181 | 2.36007E-09 |
| *FAM98B* | 0.360029321049591 | 2.41058E-09 |
| *TENC1* | -0.3598809544 | 2.44985E-09 |
| *TRA2B* | 0.359604756883208 | 2.52461E-09 |
| *IGFBP7* | -0.3595724517 | 2.53349E-09 |
| *LCN6* | -0.3595105941 | 2.55059E-09 |
| *EML4* | 0.359249998278226 | 2.62387E-09 |
| *MESDC1* | 0.359071051133258 | 2.67537E-09 |
| *SYAP1* | 0.358966503682559 | 2.7059E-09 |
| *KDM1A* | 0.358870645528344 | 2.7342E-09 |
| *FAM63A* | -0.3585349254 | 2.83557E-09 |
| *C19orf48* | 0.35833748143531 | 2.89688E-09 |
| *LYPLA1* | 0.358193248550927 | 2.94248E-09 |
| *LMF1* | -0.3581652456 | 2.95141E-09 |
| *ANKRD28* | 0.358142897625419 | 2.95856E-09 |
| *NIPA2* | 0.358067629666615 | 2.98275E-09 |
| *GPR146* | -0.3580315083 | 2.99443E-09 |
| *CLU* | -0.3578075883 | 3.06783E-09 |
| *NENF* | -0.3577590505 | 3.08397E-09 |
| *LOC728743* | -0.3575445876 | 3.15626E-09 |
| *PELI3* | -0.3575026863 | 3.17058E-09 |
| *ROM1* | -0.3574637149 | 3.18395E-09 |
| *B3GNT1* | -0.3574153068 | 3.20063E-09 |
| *IGF2BP1* | 0.357414065103422 | 3.20106E-09 |
| *THOC4* | 0.357286585641936 | 3.24541E-09 |
| *TMEM65* | 0.357269491884941 | 3.2514E-09 |
| *MRGPRF* | -0.3571291251 | 3.30101E-09 |
| *CMTM1* | 0.356943615688616 | 3.36769E-09 |
| *ENO1* | 0.356863842238512 | 3.39677E-09 |
| *C9orf110* | 0.356728990753512 | 3.44647E-09 |
| *MPHOSPH6* | 0.356709814849086 | 3.4536E-09 |
| *BTG2* | -0.3564992076 | 3.53279E-09 |
| *PEX11G* | -0.3564484775 | 3.55213E-09 |
| *CSAG3* | 0.356016005303072 | 3.72119E-09 |
| *DHRS12* | -0.3559452054 | 3.7496E-09 |
| *DEM1* | 0.355823907154145 | 3.79876E-09 |
| *AVPR2* | -0.3557868794 | 3.81389E-09 |
| *GNL3L* | 0.355621685488398 | 3.88211E-09 |
| *TIAF1* | -0.3552217871 | 4.05217E-09 |
| *SNCG* | -0.3551999555 | 4.06166E-09 |
| *CAMLG* | -0.3551700761 | 4.07468E-09 |
| *POP1* | 0.35516612469309 | 4.0764E-09 |
| *TRIM36* | 0.355062849148323 | 4.12174E-09 |
| *CCDC88A* | 0.354962554994963 | 4.16624E-09 |
| *LGI4* | -0.3549533059 | 4.17036E-09 |
| *SPARCL1* | -0.3547515975 | 4.26135E-09 |
| *MANSC1* | -0.3546966573 | 4.28646E-09 |
| *HIST1H2BL* | 0.354335900798258 | 4.45496E-09 |
| *PAK1IP1* | 0.354108325944166 | 4.56453E-09 |
| *HAUS5* | 0.353804787458612 | 4.71473E-09 |
| *TATDN2* | 0.35377440956437 | 4.73003E-09 |
| *RBM28* | 0.35361898410891 | 4.80902E-09 |
| *PTRF* | -0.3535290199 | 4.85533E-09 |
| *DEPDC7* | 0.353476430393272 | 4.8826E-09 |
| *LRSAM1* | -0.3531846282 | 5.03663E-09 |
| *MAPRE3* | -0.3531831893 | 5.0374E-09 |
| *LOC642846* | 0.353171758663177 | 5.04353E-09 |
| *DHX9* | 0.352920919881263 | 5.17985E-09 |
| *PGCP* | -0.3527576930 | 5.27047E-09 |
| *RBM8A* | 0.352737224069512 | 5.28194E-09 |
| *EIF3J* | 0.352704079896118 | 5.30057E-09 |
| *MAPK6* | 0.352318842862508 | 5.52178E-09 |
| *CPXM2* | -0.3522478144 | 5.56353E-09 |
| *HIST1H2AH* | 0.351960466251215 | 5.73556E-09 |
| *SMC6* | 0.351943184615952 | 5.74607E-09 |
| *R3HDM1* | 0.351921639666953 | 5.7592E-09 |
| *LOC55908* | -0.3516950652 | 5.89902E-09 |
| *ZNF107* | 0.351515754332063 | 6.01199E-09 |
| *PRELP* | -0.3511643345 | 6.23951E-09 |
| *CCNK* | 0.351121076852362 | 6.26808E-09 |
| *SLBP* | 0.35095649147064 | 6.37796E-09 |
| *TUBG2* | -0.3509026831 | 6.41428E-09 |
| *ARHGAP33* | 0.350731797228883 | 6.53098E-09 |
| *POLE3* | 0.350674619075406 | 6.57048E-09 |
| *KAT5* | -0.3503196672 | 6.82092E-09 |
| *DHX15* | 0.350259682775388 | 6.86415E-09 |
| *NPHP4* | 0.349932632631511 | 7.10452E-09 |
| *YTHDF2* | 0.349841872674113 | 7.17265E-09 |
| *ARMC6* | 0.349763181569948 | 7.23224E-09 |
| *HIST2H3C* | 0.349736542251446 | 7.25252E-09 |
| *MSTO1* | 0.349638310361519 | 7.32777E-09 |
| *HNRNPK* | 0.34942021085896 | 7.49757E-09 |
| *CRY2* | -0.3492572902 | 7.62688E-09 |
| *ZNF273* | 0.349043680225168 | 7.7997E-09 |
| *THYN1* | -0.3488000625 | 8.00142E-09 |
| *FXYD1* | -0.3486944418 | 8.09043E-09 |
| *DLX1* | 0.348659334601589 | 8.12023E-09 |
| *PI4K2B* | 0.34789723906266 | 8.79385E-09 |
| *PSMD11* | 0.347769778451303 | 8.91167E-09 |
| *ZNF878* | 0.34755121356799 | 9.11725E-09 |
| *TMEM194A* | 0.347366768695213 | 9.29429E-09 |
| *ANAPC16* | -0.3473116540 | 9.34784E-09 |
| *ZNF367* | 0.34730673774493 | 9.35263E-09 |
| *EIF2AK4* | 0.347271623264002 | 9.38692E-09 |
| *AMH* | 0.346973702699325 | 9.68274E-09 |
| *ACBD7* | 0.346963681917475 | 9.69285E-09 |
| *PANK3* | 0.346864649261047 | 9.79327E-09 |
| *TFRC* | 0.346754063679394 | 9.90659E-09 |
| *ACAT2* | 0.346711585780549 | 9.95045E-09 |
| *ARHGEF37* | -0.3464347951 | 1.02409E-08 |
| *NRD1* | 0.346411921430217 | 1.02653E-08 |
| *YPEL5* | -0.3462046291 | 1.04887E-08 |
| *REEP4* | 0.34612313525124 | 1.05778E-08 |
| *LOC284440* | -0.3458043740 | 1.09334E-08 |
| *SLC31A1* | 0.345744644706969 | 1.10013E-08 |
| *C4orf3* | -0.3457194817 | 1.103E-08 |
| *REM1* | -0.3453404138 | 1.14716E-08 |
| *SFRS4* | 0.345065482365674 | 1.18026E-08 |
| *P4HTM* | -0.3449551379 | 1.1938E-08 |
| *KBTBD8* | 0.344793085913385 | 1.21396E-08 |
| *C1S* | -0.3446653668 | 1.23008E-08 |
| *RNF182* | 0.344499949577075 | 1.25126E-08 |
| *PAQR4* | 0.344365518147933 | 1.26874E-08 |
| *EIF2AK2* | 0.344272903864099 | 1.28091E-08 |
| *SLC25A10* | 0.343992603169245 | 1.31846E-08 |
| *PRKDC* | 0.343887371260785 | 1.33282E-08 |
| *LRP10* | -0.3437352184 | 1.35386E-08 |
| *GPR89A* | 0.3434403254 | 1.39556E-08 |
| *CCT5* | 0.343432610927761 | 1.39667E-08 |
| *MXRA7* | -0.3434134596 | 1.39942E-08 |
| *MURC* | 0.34323967443792 | 1.42464E-08 |
| *POLR2D* | 0.342761753465853 | 1.49627E-08 |
| *GPD2* | 0.341998133437743 | 1.61801E-08 |
| *BRWD3* | 0.341816958643091 | 1.64826E-08 |
| *RASA4P* | -0.3417762183 | 1.65514E-08 |
| *C10orf12* | 0.341541842730708 | 1.69525E-08 |
| *PAICS* | 0.341431663668462 | 1.71443E-08 |
| *FXC1* | -0.3413041181 | 1.73689E-08 |
| *IARS* | 0.341265641909921 | 1.74373E-08 |
| *AVL9* | 0.341116218732408 | 1.7705E-08 |
| *FAM126A* | 0.34094620463912 | 1.80146E-08 |
| *CCT6A* | 0.340933509847085 | 1.80379E-08 |
| *TNFSF12* | -0.3409056532 | 1.80892E-08 |
| *PPIP5K2* | 0.34082807281256 | 1.82327E-08 |
| *HNRNPD* | 0.340585603927394 | 1.86885E-08 |
| *EIF4A3* | 0.340337232003486 | 1.91667E-08 |
| *HSPA14* | 0.340318545474252 | 1.92032E-08 |
| *KIAA1841* | 0.340182825177597 | 1.947E-08 |
| *GPR155* | -0.3401796828 | 1.94762E-08 |
| *PRPF40B* | -0.3401754400 | 1.94846E-08 |
| *PHF19* | 0.340043779058508 | 1.9747E-08 |
| *ZBED4* | 0.34002763258157 | 1.97794E-08 |
| *RAE1* | 0.339603533209868 | 2.06495E-08 |
| *RWDD2A* | -0.3395222292 | 2.08204E-08 |
| *AOC3* | -0.3391179001 | 2.16911E-08 |
| *SMARCA4* | 0.339026631986307 | 2.18925E-08 |
| *PDE1A* | -0.3389747773 | 2.20077E-08 |
| *STAT5A* | -0.3389547378 | 2.20524E-08 |
| *ONECUT2* | 0.338709938467564 | 2.26052E-08 |
| *C1R* | -0.3387040960 | 2.26186E-08 |
| *TSR1* | 0.338697146074668 | 2.26345E-08 |
| *TUBG1* | 0.338437085513156 | 2.32372E-08 |
| *VDAC1* | 0.338319289207915 | 2.35153E-08 |
| *AMZ2P1* | -0.3382205726 | 2.37508E-08 |
| *TACR1* | -0.3381463300 | 2.39294E-08 |
| *GYG1* | -0.3380899411 | 2.4066E-08 |
| *ERO1L* | 0.337984845221288 | 2.43224E-08 |
| *LOC442308* | 0.337759418904998 | 2.48815E-08 |
| *DNAJC30* | -0.3376255337 | 2.52194E-08 |
| *FANCG* | 0.337607948925593 | 2.52641E-08 |
| *SLC46A1* | -0.3375165833 | 2.54976E-08 |
| *CCDC159* | -0.3374689228 | 2.56202E-08 |
| *LOH12CR2* | -0.3373595866 | 2.59037E-08 |
| *GLTSCR2* | -0.3373050624 | 2.60462E-08 |
| *STAT3* | -0.3373042514 | 2.60483E-08 |
| *ZNF318* | 0.337170157473313 | 2.6402E-08 |
| *SNRPD1* | 0.337048921679753 | 2.67258E-08 |
| *LHX2* | 0.337038959476418 | 2.67525E-08 |
| *PGAM5* | 0.336942593826895 | 2.70129E-08 |
| *HS1BP3* | -0.3368375905 | 2.72993E-08 |
| *KIAA0090* | 0.336755220801964 | 2.75261E-08 |
| *PSPH* | 0.336282293079959 | 2.88636E-08 |
| *POLG* | 0.336248149488828 | 2.89625E-08 |
| *RRAS* | -0.3361843478 | 2.91483E-08 |
| *SFRS15* | 0.336166631035485 | 2.92001E-08 |
| *PHF6* | 0.336059518374679 | 2.95151E-08 |
| *RCN2* | 0.336055085425924 | 2.95282E-08 |
| *LOC286467* | 0.335892961423428 | 3.00115E-08 |
| *HIST1H2AM* | 0.33578477330272 | 3.03382E-08 |
| *UBE2D4* | -0.3354794108 | 3.1279E-08 |
| *MEF2D* | -0.3354132917 | 3.14863E-08 |
| *NUDT15* | 0.335279582719207 | 3.19098E-08 |
| *CYB5D2* | -0.3352674075 | 3.19486E-08 |
| *MRVI1* | -0.3351962615 | 3.21764E-08 |
| *PRMT2* | -0.3348740444 | 3.32279E-08 |
| *UCK2* | 0.334635438244281 | 3.40278E-08 |
| *CDIPT* | -0.3344949160 | 3.45075E-08 |
| *CSTF3* | 0.334243451938375 | 3.53824E-08 |
| *C1orf88* | -0.3340801454 | 3.59619E-08 |
| *MORN5* | -0.3339816486 | 3.63159E-08 |
| *PCMTD1* | -0.3334914021 | 3.81282E-08 |
| *PSMD14* | 0.333411936159978 | 3.843E-08 |
| *MEGF10* | 0.333375345325375 | 3.85698E-08 |
| *PHLDA3* | -0.3331393782 | 3.9483E-08 |
| *CYHR1* | -0.3331017756 | 3.96304E-08 |
| *NOL9* | 0.33279387135849 | 4.08578E-08 |
| *TPI1P2* | 0.332724196891779 | 4.11405E-08 |
| *TOMM40* | 0.332665915821174 | 4.13785E-08 |
| *AES* | -0.3326604021 | 4.14011E-08 |
| *GLYATL2* | 0.332574769685202 | 4.17534E-08 |
| *BDH2* | -0.3324987639 | 4.20684E-08 |
| *NUDT21* | 0.332471683688149 | 4.21812E-08 |
| *KHSRP* | 0.332454094641931 | 4.22547E-08 |
| *TBCCD1* | 0.332430660723969 | 4.23527E-08 |
| *ATAD3A* | 0.332406325416141 | 4.24547E-08 |
| *DNAJB6* | -0.3323535620 | 4.26767E-08 |
| *IMMP2L* | -0.3320424934 | 4.40086E-08 |
| *RSPO3* | -0.3318617670 | 4.48007E-08 |
| *GK3P* | 0.331795639032388 | 4.50939E-08 |
| *RANBP9* | 0.331606717324311 | 4.59419E-08 |
| *PGK1* | 0.331557153416734 | 4.61669E-08 |
| *UCHL5* | 0.331539896392416 | 4.62455E-08 |
| *PTTG2* | 0.331469209418503 | 4.65688E-08 |
| *MESP2* | 0.33136097062259 | 4.7068E-08 |
| *C15orf44* | 0.33126168119748 | 4.75305E-08 |
| *TINAGL1* | -0.3311551350 | 4.80317E-08 |
| *LYNX1* | -0.3310556800 | 4.85041E-08 |
| *HP1BP3* | 0.330964789310517 | 4.89397E-08 |
| *TTC25* | -0.3307201987 | 5.01308E-08 |
| *FLJ35776* | -0.3306656712 | 5.04001E-08 |
| *HNRNPA3P1* | 0.330648826129077 | 5.04836E-08 |
| *SNRPB* | 0.330586580581111 | 5.07932E-08 |
| *STAT5B* | -0.3305084547 | 5.11845E-08 |
| *HIST1H2BO* | 0.330430175406663 | 5.15794E-08 |
| *NOSTRIN* | -0.3303872150 | 5.17973E-08 |
| *NAA40* | 0.330335987705789 | 5.20584E-08 |
| *RBBP4* | 0.329949253211509 | 5.40707E-08 |
| *YPEL4* | -0.3298872918 | 5.44E-08 |
| *HDGFRP3* | 0.329819339108272 | 5.47633E-08 |
| *MAP2K1* | 0.329665904945977 | 5.55924E-08 |
| *HIATL1* | 0.329575524930582 | 5.60864E-08 |
| *C1orf83* | 0.329409643583873 | 5.70041E-08 |
| *APITD1* | 0.329364481773079 | 5.72564E-08 |
| *CCDC123* | 0.329264166646075 | 5.78208E-08 |
| *SMARCD1* | 0.329235061828611 | 5.79855E-08 |
| *TCEB3* | 0.329212785860762 | 5.81119E-08 |
| *ABHD14B* | -0.3292008027 | 5.818E-08 |
| *CHRNA5* | 0.329044644828547 | 5.90745E-08 |
| *ZNF473* | 0.328912742777543 | 5.98404E-08 |
| *NGLY1* | 0.328845783698918 | 6.02329E-08 |
| *DEXI* | -0.3286927662 | 6.11391E-08 |
| *RNF24* | 0.328561381391553 | 6.19276E-08 |
| *TXNDC15* | -0.3281906600 | 6.42057E-08 |
| *TCF7* | 0.328157722403342 | 6.44119E-08 |
| *PRRT1* | -0.3280068058 | 6.53652E-08 |
| *VWA5A* | -0.3278962297 | 6.60723E-08 |
| *FLJ23867* | -0.3278841798 | 6.61498E-08 |
| *CLUAP1* | -0.3274756375 | 6.88296E-08 |
| *LYRM1* | -0.3274565360 | 6.89574E-08 |
| *LMOD1* | -0.3273596688 | 6.96091E-08 |
| *ARL6IP5* | -0.3271812349 | 7.08252E-08 |
| *GTF2IRD2P1* | -0.3271323558 | 7.11619E-08 |
| *WDR5* | 0.327125853556701 | 7.12068E-08 |
| *C19orf66* | -0.3270472214 | 7.17519E-08 |
| *EIF2C3* | 0.327013419417778 | 7.19875E-08 |
| *TMOD1* | -0.3269454411 | 7.24636E-08 |
| *BAZ1A* | 0.326670084288754 | 7.44231E-08 |
| *CDC27* | 0.326526903886276 | 7.54621E-08 |
| *RSC1A1* | 0.326493252839575 | 7.57083E-08 |
| *SFRS7* | 0.326432744997982 | 7.61529E-08 |
| *SMC3* | 0.326431232250519 | 7.61641E-08 |
| *CD59* | -0.3258308695 | 8.07149E-08 |
| *KBTBD2* | 0.325816847322473 | 8.08243E-08 |
| *LDLRAD2* | -0.3256715596 | 8.19658E-08 |
| *GPT2* | 0.325618641320907 | 8.23854E-08 |
| *ZNF101* | 0.325595263502332 | 8.25714E-08 |
| *PDE2A* | -0.3255701810 | 8.27715E-08 |
| *PHYHIP* | -0.3249668847 | 8.77261E-08 |
| *DHFRL1* | -0.3248912607 | 8.8367E-08 |
| *SUPT16H* | 0.324859120798055 | 8.86407E-08 |
| *C1orf84* | 0.324811419530326 | 8.90484E-08 |
| *TACR2* | -0.3247646847 | 8.94497E-08 |
| *C11orf66* | -0.3246104324 | 9.07864E-08 |
| *KCNC4* | -0.3244468506 | 9.2225E-08 |
| *HIST1H4C* | 0.32443308043772 | 9.23471E-08 |
| *PEBP1* | -0.3243611345 | 9.29875E-08 |
| *TAGLN* | -0.3241078366 | 9.52765E-08 |
| *LRRC57* | 0.32408884165874 | 9.54503E-08 |
| *MYBL1* | 0.324021286224468 | 9.6071E-08 |
| *MYO19* | 0.324019233904087 | 9.60899E-08 |
| *JAM3* | -0.3236632228 | 9.94261E-08 |
| *VBP1* | 0.323431399835541 | 1.01658E-07 |
| *WFS1* | -0.3233495333 | 1.02458E-07 |
| *TCEAL1* | -0.3233383439 | 1.02568E-07 |
| *RP2* | 0.323283363176976 | 1.03109E-07 |
| *DKFZp779M0652* | -0.3231273262 | 1.04659E-07 |
| *URB2* | 0.32312565362442 | 1.04676E-07 |
| *CBX5* | 0.323085409246039 | 1.05079E-07 |
| *NUP160* | 0.32295579082728 | 1.06389E-07 |
| *UPF3B* | 0.322954252622188 | 1.06405E-07 |
| *DAZAP1* | 0.322745144158525 | 1.08552E-07 |
| *AQP1* | -0.3224632509 | 1.11512E-07 |
| *DOK4* | -0.3223790321 | 1.12411E-07 |
| *GPC2* | 0.322372682632378 | 1.12479E-07 |
| *DPF1* | 0.322344029696871 | 1.12787E-07 |
| *ALG6* | 0.322247900494249 | 1.13825E-07 |
| *LOC344967* | 0.322238290424393 | 1.1393E-07 |
| *CHEK2* | 0.322129040696477 | 1.15122E-07 |
| *VHL* | 0.321926318231098 | 1.17366E-07 |
| *TMX1* | 0.321868953026152 | 1.18009E-07 |
| *NDRG2* | -0.3218464204 | 1.18262E-07 |
| *TOLLIP* | -0.3217760458 | 1.19057E-07 |
| *SCRG1* | -0.3215880736 | 1.21205E-07 |
| *DARC* | -0.3214442673 | 1.22873E-07 |
| *IFT46* | -0.3212153970 | 1.25574E-07 |
| *GNPTG* | -0.3210274322 | 1.27835E-07 |
| *TMEM63A* | -0.3208812328 | 1.29621E-07 |
| *UBIAD1* | 0.320692267693964 | 1.31964E-07 |
| *TRAF3* | 0.320681684051381 | 1.32096E-07 |
| *C14orf159* | -0.3205828640 | 1.33339E-07 |
| *SCML2* | 0.320191746824693 | 1.38369E-07 |
| *LIN28B* | 0.320160126851737 | 1.38784E-07 |
| *RASL11A* | -0.3198377837 | 1.43078E-07 |
| *FLJ35390* | -0.3197302658 | 1.44539E-07 |
| *LIPT1* | -0.3196964431 | 1.45001E-07 |
| *HIST1H3G* | 0.319618390251474 | 1.46074E-07 |
| *SELP* | -0.3194798742 | 1.47996E-07 |
| *OSBPL3* | 0.319445904103905 | 1.48472E-07 |
| *C9orf40* | 0.31921230791252 | 1.51779E-07 |
| *SF3B3* | 0.31920781238087 | 1.51843E-07 |
| *POLA1* | 0.319171394125011 | 1.52365E-07 |
| *COMMD6* | -0.3190813720 | 1.53664E-07 |
| *KHK* | -0.3189321241 | 1.55839E-07 |
| *SUMF1* | -0.3188379969 | 1.57227E-07 |
| *FSD1L* | 0.318672697702772 | 1.59692E-07 |
| *SUB1* | 0.318610653821878 | 1.60627E-07 |
| *PGAP3* | -0.3185617222 | 1.61368E-07 |
| *CEP192* | 0.31848726320531 | 1.62501E-07 |
| *SNX30* | 0.318415369520913 | 1.63603E-07 |
| *GART* | 0.318324988976437 | 1.64999E-07 |
| *ZNF845* | 0.31823607203234 | 1.66383E-07 |
| *C16orf61* | 0.318186126992189 | 1.67166E-07 |
| *MSH5* | 0.3180157865628 | 1.69861E-07 |
| *TAPBPL* | -0.3178349194 | 1.72768E-07 |
| *SLC25A17* | 0.317789014512263 | 1.73514E-07 |
| *SRRT* | 0.317594986318502 | 1.76699E-07 |
| *C8orf39* | 0.317493969218497 | 1.78379E-07 |
| *VPS28* | -0.3174189850 | 1.79637E-07 |
| *ULBP3* | 0.317236436763152 | 1.82733E-07 |
| *ZNF28* | 0.317064352798261 | 1.85699E-07 |
| *SEH1L* | 0.316851696462596 | 1.89429E-07 |
| *TYK2* | 0.316788301311261 | 1.90554E-07 |
| *RASGRP2* | -0.3167243171 | 1.91697E-07 |
| *COCH* | 0.316408135259979 | 1.9744E-07 |
| *C1orf174* | 0.316231387197926 | 2.00723E-07 |
| *MGP* | -0.3162289431 | 2.00768E-07 |
| *RAB42* | 0.315850152889577 | 2.07982E-07 |
| *ISL2* | 0.315676032996748 | 2.11381E-07 |
| *SDF2* | -0.3156335186 | 2.12219E-07 |
| *LOC729176* | 0.315602592556397 | 2.1283E-07 |
| *ZMYND19* | 0.315548931493082 | 2.13895E-07 |
| *ERVFRDE1* | -0.3154594289 | 2.15683E-07 |
| *TFR2* | 0.31535962676201 | 2.17694E-07 |
| *TUBB2C* | 0.315071640098384 | 2.23597E-07 |
| *NLRP11* | 0.315019202395958 | 2.24689E-07 |
| *CACYBP* | 0.314869473864279 | 2.27833E-07 |
| *KIAA1024* | 0.31466306928796 | 2.32237E-07 |
| *HNMT* | -0.3146328038 | 2.32889E-07 |
| *TFAM* | 0.314575751236828 | 2.34124E-07 |
| *GTF2IRD2* | -0.3145069314 | 2.35622E-07 |
| *SLC2A4* | -0.3144960378 | 2.3586E-07 |
| *CBY1* | -0.3144686885 | 2.36459E-07 |
| *HMGCS1* | 0.314252621730289 | 2.41238E-07 |
| *ZSWIM4* | 0.314059961988729 | 2.45578E-07 |
| *KRAS* | 0.313834499558987 | 2.50752E-07 |
| *ZFYVE21* | -0.3137218055 | 2.53378E-07 |
| *ADAM12* | 0.313709191049466 | 2.53673E-07 |
| *ZNF468* | 0.313655060817911 | 2.54945E-07 |
| *MGC12916* | 0.313560526699658 | 2.57181E-07 |
| *ATP1A3* | 0.313523634631253 | 2.58058E-07 |
| *BRI3BP* | 0.313490881139668 | 2.5884E-07 |
| *GGCT* | 0.313318619386623 | 2.62988E-07 |
| *CHD1* | 0.313102786301035 | 2.68275E-07 |
| *RNF138* | 0.313056156446884 | 2.69431E-07 |
| *HIST1H1E* | 0.312897024192019 | 2.73411E-07 |
| *CHN1* | 0.312685747835177 | 2.78783E-07 |
| *SLC20A1* | 0.312652896596828 | 2.79627E-07 |
| *ACSM1* | -0.3126229257 | 2.80399E-07 |
| *SLC25A26* | -0.3126129133 | 2.80658E-07 |
| *HDGF* | 0.312416955140493 | 2.85763E-07 |
| *NFE2L1* | -0.3122532787 | 2.90095E-07 |
| *LRRC29* | -0.3122100565 | 2.9125E-07 |
| *GALT* | -0.3122081404 | 2.91301E-07 |
| *C7* | -0.3121911021 | 2.91757E-07 |
| *RINT1* | 0.312116705443706 | 2.93758E-07 |
| *NBR1* | -0.3120871249 | 2.94558E-07 |
| *PHOSPHO2* | -0.3120760212 | 2.94858E-07 |
| *PROS1* | -0.3120321625 | 2.96048E-07 |
| *DHX58* | -0.3119101072 | 2.99384E-07 |
| *AQR* | 0.311843443153779 | 3.01222E-07 |
| *NUDCD1* | 0.31181775211439 | 3.01933E-07 |
| *PKM2* | 0.311436728126499 | 3.12668E-07 |
| *MCART6* | 0.311303387948752 | 3.1651E-07 |
| *TOP1* | 0.311300545055327 | 3.16593E-07 |
| *ZBTB9* | 0.31126190062529 | 3.17715E-07 |
| *TTC15* | -0.3112111335 | 3.19195E-07 |
| *ZCWPW2* | -0.3110646866 | 3.23502E-07 |
| *SMARCB1* | 0.311052570495704 | 3.23861E-07 |
| *CASP12* | -0.3110126418 | 3.25047E-07 |
| *FBXW4* | -0.3109987908 | 3.25459E-07 |
| *SIP1* | 0.310893417427165 | 3.28611E-07 |
| *TMEFF1* | 0.310717706975535 | 3.33932E-07 |
| *MTFR1* | 0.310616410381122 | 3.37037E-07 |
| *POC5* | 0.310610018951385 | 3.37233E-07 |
| *CSAG2* | 0.310595417922489 | 3.37683E-07 |
| *GTF2IRD2B* | -0.3105928434 | 3.37763E-07 |
| *C2orf40* | -0.3105736564 | 3.38355E-07 |
| *GATC* | 0.310521941183441 | 3.39957E-07 |
| *RQCD1* | 0.310483691920039 | 3.41147E-07 |
| *CDKN2D* | 0.310443585707482 | 3.42398E-07 |
| *LOC90110* | -0.3104071689 | 3.43538E-07 |
| *PIP5K1A* | 0.310176545584815 | 3.50844E-07 |
| *MAP1LC3A* | -0.3100929554 | 3.53528E-07 |
| *ST5* | -0.3100799421 | 3.53948E-07 |
| *DPH2* | 0.309905633656689 | 3.59616E-07 |
| *PSMC3IP* | 0.309812196262806 | 3.6269E-07 |
| *SDPR* | -0.3094629112 | 3.74406E-07 |
| *ADAM10* | 0.309285626970933 | 3.80491E-07 |
| *C7orf11* | 0.30927109232077 | 3.80994E-07 |
| *LOC401010* | 0.309241282501658 | 3.82028E-07 |
| *SFRS2B* | -0.3091679861 | 3.84581E-07 |
| *HAS2AS* | 0.309124287209583 | 3.86111E-07 |
| *MSRB2* | -0.3089665223 | 3.91683E-07 |
| *TMEM219* | -0.3089072557 | 3.93796E-07 |
| *CBX1* | 0.3088857910107 | 3.94565E-07 |
| *NR6A1* | 0.308760413561964 | 3.99079E-07 |
| *MAP3K12* | -0.3087334190 | 4.00058E-07 |
| *OSBPL6* | 0.308503278466723 | 4.08495E-07 |
| *USHBP1* | -0.3084289446 | 4.11256E-07 |
| *GPATCH1* | 0.308408897165712 | 4.12004E-07 |
| *BCO2* | -0.3083835093 | 4.12952E-07 |
| *SET* | 0.308331860562049 | 4.14889E-07 |
| *HIST1H2AJ* | 0.308207940528761 | 4.19572E-07 |
| *MVP* | -0.3081523870 | 4.21687E-07 |
| *NXPH3* | -0.3081454570 | 4.21952E-07 |
| *GCLM* | 0.30810816954248 | 4.23378E-07 |
| *C6orf182* | 0.308051340226124 | 4.25561E-07 |
| *HTR1D* | 0.307933258785945 | 4.30132E-07 |
| *DCAF13* | 0.307932449885329 | 4.30163E-07 |
| *LOC100128239* | -0.3078386072 | 4.3383E-07 |
| *MAGEA2* | 0.307836311157626 | 4.3392E-07 |
| *TCEAL4* | -0.3078180390 | 4.34637E-07 |
| *YY1* | 0.307812057118798 | 4.34872E-07 |
| *MMRN2* | -0.3077718058 | 4.36457E-07 |
| *DPP9* | 0.307757349149552 | 4.37028E-07 |
| *TCF3* | 0.307529141264463 | 4.46133E-07 |
| *LYPLA2P1* | 0.307461921826342 | 4.48849E-07 |
| *CHAC1* | 0.307405609242017 | 4.51137E-07 |
| *PA2G4P4* | 0.307384109933429 | 4.52014E-07 |
| *BRIX1* | 0.307350275701647 | 4.53396E-07 |
| *C11orf68* | -0.3072734064 | 4.56552E-07 |
| *PIPOX* | -0.3072688568 | 4.5674E-07 |
| *PDS5A* | 0.30726175578089 | 4.57032E-07 |
| *MAOB* | -0.3072470150 | 4.57641E-07 |
| *NOL11* | 0.307225219727039 | 4.58541E-07 |
| *SPATA18* | -0.3071936378 | 4.5985E-07 |
| *ANKRD52* | 0.30718138825147 | 4.60358E-07 |
| *CHCHD3* | 0.306910455214088 | 4.71741E-07 |
| *DCP2* | 0.306863849416767 | 4.73726E-07 |
| *ZBTB34* | 0.306847245346677 | 4.74435E-07 |
| *FYCO1* | -0.3068330355 | 4.75043E-07 |
| *PGM5* | -0.3067780537 | 4.77401E-07 |
| *EFTUD1* | 0.306642700748605 | 4.83255E-07 |
| *CASK* | 0.306424660692432 | 4.9283E-07 |
| *FXYD6* | -0.3063674015 | 4.95375E-07 |
| *SLC35A2* | 0.306193251953599 | 5.03191E-07 |
| *FIS1* | -0.3061203430 | 5.06499E-07 |
| *C1orf70* | -0.3061039131 | 5.07247E-07 |
| *MXI1* | -0.3059850797 | 5.1269E-07 |
| *SYCE2* | 0.305876872722203 | 5.17695E-07 |
| *GEMIN8P4* | 0.305875634656945 | 5.17753E-07 |
| *PPEF1* | 0.30582197922047 | 5.20252E-07 |
| *LOC100132724* | 0.305771767114769 | 5.22601E-07 |
| *CAB39L* | -0.3056953489 | 5.26197E-07 |
| *PPP1R12C* | -0.3056456084 | 5.2855E-07 |
| *ATP2B4* | -0.3056189349 | 5.29815E-07 |
| *WBP2* | -0.3053753259 | 5.41512E-07 |
| *PCGF6* | 0.305350134334498 | 5.42735E-07 |
| *HMGN1* | 0.305302981662631 | 5.45033E-07 |
| *EGFL7* | -0.3052837386 | 5.45973E-07 |
| *THTPA* | -0.3052463002 | 5.47807E-07 |
| *TBX15* | 0.305065966387237 | 5.56722E-07 |
| *USP3* | 0.304974219186943 | 5.61312E-07 |
| *ZNF765* | 0.304724768703231 | 5.73973E-07 |
| *NMUR1* | -0.3047064046 | 5.74916E-07 |
| *SHISA4* | -0.3047041166 | 5.75033E-07 |
| *LETM1* | 0.30463639548014 | 5.78524E-07 |
| *ERH* | 0.304575752355742 | 5.81667E-07 |
| *CRYAB* | -0.3044708996 | 5.87139E-07 |
| *TNS1* | -0.3044186448 | 5.89885E-07 |
| *QSER1* | 0.304223487752963 | 6.00249E-07 |
| *LSM5* | 0.304217434074751 | 6.00573E-07 |
| *PTP4A2* | 0.304202418829045 | 6.01378E-07 |
| *H2AFZ* | 0.304169757445324 | 6.03133E-07 |
| *PPAP2A* | -0.3041613003 | 6.03588E-07 |
| *H3F3C* | 0.304154973694694 | 6.03929E-07 |
| *ZNF431* | 0.303885984093191 | 6.18586E-07 |
| *NUP107* | 0.303800294455243 | 6.23326E-07 |
| *SFRS14* | 0.303700657616846 | 6.28882E-07 |
| *CD3EAP* | 0.303645335990518 | 6.31987E-07 |
| *MIS12* | 0.303581080079525 | 6.35612E-07 |
| *RCCD1* | 0.303419675272581 | 6.44805E-07 |
| *ADORA2B* | 0.303332322333178 | 6.49834E-07 |
| *C3orf71* | -0.3032916423 | 6.52189E-07 |
| *CRLF3* | 0.303157032672571 | 6.60038E-07 |
| *SOD3* | -0.3031465420 | 6.60654E-07 |
| *ASB7* | 0.303073841672419 | 6.64935E-07 |
| *PUS7* | 0.303062303531012 | 6.65617E-07 |
| *NT5C3* | 0.302666642287757 | 6.89409E-07 |
| *COX7A1* | -0.3026423349 | 6.90896E-07 |
| *HSD17B14* | -0.3025920245 | 6.93986E-07 |
| *ST6GALNAC6* | -0.3025180327 | 6.98553E-07 |
| *TTL* | 0.30251299111904 | 6.98866E-07 |
| *ACCS* | -0.3025039270 | 6.99427E-07 |
| *TNFRSF1A* | -0.3023634268 | 7.0819E-07 |
| *HIST1H3I* | 0.30231257198019 | 7.11388E-07 |
| *QTRTD1* | 0.302086522032513 | 7.2577E-07 |
| *SEC23B* | 0.302078427823186 | 7.2629E-07 |
| *TRPM8* | 0.3020748125607 | 7.26523E-07 |
| *HIBCH* | -0.3020291612 | 7.29464E-07 |
| *VENTX* | -0.3020211954 | 7.29978E-07 |
| *EML3* | -0.3018799225 | 7.39158E-07 |
| *FTSJ2* | 0.301688696398213 | 7.5176E-07 |
| *RNF103* | -0.3014836399 | 7.65501E-07 |
| *TMEM66* | -0.3014065255 | 7.70731E-07 |
| *PDDC1* | -0.3011853699 | 7.8592E-07 |
| *KLF9* | -0.3010455240 | 7.95672E-07 |
| *C5orf22* | 0.301018342418368 | 7.97581E-07 |
| *HS3ST3B1* | 0.30086072595347 | 8.08737E-07 |
| *SYNGR4* | 0.300588268308789 | 8.28374E-07 |
| *TAF1B* | 0.300570713338785 | 8.29655E-07 |
| *ARHGAP1* | -0.3005481047 | 8.31307E-07 |
| *NUDT1* | 0.300491962591703 | 8.35424E-07 |
| *PHTF1* | 0.300428243529494 | 8.4012E-07 |
| *UBA6* | 0.300395726039598 | 8.42526E-07 |
| *LYRM5* | -0.3003333989 | 8.47157E-07 |
| *DNAJC19* | -0.3003172979 | 8.48357E-07 |
| *CHRNA1* | 0.300278400643314 | 8.51263E-07 |
| *SQLE* | 0.300239994259807 | 8.54141E-07 |
| *MKRN3* | 0.300227979675238 | 8.55044E-07 |
| *FGD1* | 0.300208767304603 | 8.56489E-07 |
| *HMGXB4* | 0.300188134125725 | 8.58043E-07 |
| *HIATL2* | 0.300167445891166 | 8.59605E-07 |
| *SMC5* | 0.300028109130529 | 8.70191E-07 |
| *C19orf55* | 0.300021176403779 | 8.70721E-07 |
| *CEMP1* | -0.2999994054 | 8.72388E-07 |
| *HK2* | 0.299914852378676 | 8.78888E-07 |
| *CHKB* | -0.2997870570 | 8.88802E-07 |
| *UBE2G1* | 0.299771935612703 | 8.89982E-07 |
| *HN1L* | 0.299759712461012 | 8.90937E-07 |
| *SEMA3B* | -0.2997504498 | 8.91661E-07 |
| *FCER1A* | -0.2997353028 | 8.92847E-07 |
| *PGPEP1* | -0.2995976566 | 9.03691E-07 |
| *C19orf57* | 0.299416719751804 | 9.18138E-07 |
| *VEGFB* | -0.2994062171 | 9.18983E-07 |
| *LOC339674* | 0.299286744534922 | 9.28651E-07 |
| *EPHX2* | -0.2992166830 | 9.34366E-07 |
| *CCDC41* | 0.2991835847079 | 9.37078E-07 |
| *LGTN* | -0.2991526308 | 9.39621E-07 |
| *SRFBP1* | 0.29913591966856 | 9.40996E-07 |
| *BTBD12* | 0.299128029427458 | 9.41646E-07 |
| *CTCFL* | 0.299109230865728 | 9.43197E-07 |
| *HBP1* | -0.2991014883 | 9.43836E-07 |
| *GPR137C* | 0.298915347423382 | 9.59333E-07 |
| *KDM5C* | 0.298861049693255 | 9.63899E-07 |
| *UBA2* | 0.298826895374745 | 9.66782E-07 |
| *FLYWCH1* | -0.2987184585 | 9.75989E-07 |
| *ZC3H18* | 0.29861315450173 | 9.85011E-07 |
| *KHDRBS1* | 0.298570931868735 | 9.88651E-07 |
| *C10orf26* | -0.2984866393 | 9.95956E-07 |
| *ZC3H10* | -0.2984643764 | 9.97893E-07 |
| *C2orf74* | -0.2984554510 | 9.98671E-07 |
| *RAPGEF3* | -0.2983987361 | 1.00363E-06 |
| *ITPRIPL1* | 0.298356515158189 | 1.00733E-06 |
| *MAGEA12* | 0.298296950913167 | 1.01258E-06 |
| *PPIH* | 0.298160483797227 | 1.02471E-06 |
| *SGSH* | -0.2980549831 | 1.03418E-06 |
| *MRE11A* | 0.298054669573744 | 1.03421E-06 |
| *LIPG* | 0.29796094738212 | 1.04269E-06 |
| *TTYH3* | 0.29790702106394 | 1.0476E-06 |
| *YPEL2* | -0.2978410405 | 1.05364E-06 |
| *ROD1* | 0.297796564516625 | 1.05773E-06 |
| *LOC442459* | 0.297780552295763 | 1.05921E-06 |
| *PSMA4* | 0.29771003130939 | 1.06573E-06 |
| *CDC23* | 0.29757744512631 | 1.0781E-06 |
| *HSPB6* | -0.2975566841 | 1.08005E-06 |
| *FLJ43663* | -0.2974944869 | 1.08591E-06 |
| *C18orf19* | 0.297455365546715 | 1.08961E-06 |
| *ELK1* | 0.297299453734665 | 1.10449E-06 |
| *ME3* | -0.2972132300 | 1.11279E-06 |
| *SLC25A33* | 0.297106523616242 | 1.12316E-06 |
| *EIF2S1* | 0.297064959849623 | 1.12722E-06 |
| *TOMM7* | -0.2970615734 | 1.12755E-06 |
| *LOC375190* | -0.2970387781 | 1.12979E-06 |
| *HOXD8* | -0.2969865614 | 1.13492E-06 |
| *EXD3* | -0.2969765878 | 1.1359E-06 |
| *EIF2C2* | 0.296971500786549 | 1.13641E-06 |
| *CCDC102A* | -0.2968438468 | 1.14907E-06 |
| *ELF4* | 0.296817729570312 | 1.15168E-06 |
| *ANAPC1* | 0.296656999342785 | 1.16784E-06 |
| *GABRQ* | 0.296593396015401 | 1.1743E-06 |
| *CEBPG* | 0.296555383711103 | 1.17818E-06 |
| *THBS3* | -0.2965096024 | 1.18286E-06 |
| *CCDC90A* | 0.296425115204384 | 1.19156E-06 |
| *DKFZP686I15217* | -0.2963309420 | 1.20132E-06 |
| *HSPH1* | 0.296317710023273 | 1.20269E-06 |
| *ZNF146* | 0.296240526231775 | 1.21076E-06 |
| *GPIHBP1* | -0.2961884394 | 1.21623E-06 |
| *SCML1* | 0.296013614390509 | 1.23477E-06 |
| *UBA1* | 0.295990346262395 | 1.23726E-06 |
| *ING4* | -0.2959618141 | 1.24032E-06 |
| *COL19A1* | 0.29593231418763 | 1.24349E-06 |
| *PLA2G4C* | -0.2958814306 | 1.24897E-06 |
| *GPR180* | 0.295850825200365 | 1.25228E-06 |
| *C6orf225* | -0.2958436864 | 1.25305E-06 |
| *APBB1* | -0.2957815091 | 1.2598E-06 |
| *CCDC75* | 0.295755961486351 | 1.26259E-06 |
| *CAMK4* | 0.29562287178082 | 1.27719E-06 |
| *PRDM13* | 0.295572223690503 | 1.28279E-06 |
| *PIGW* | 0.29554041457339 | 1.28632E-06 |
| *CAMK2G* | -0.2955366903 | 1.28673E-06 |
| *IL1RAPL2* | 0.295460720195448 | 1.2952E-06 |
| *C4A* | -0.2954412693 | 1.29738E-06 |
| *MAOA* | -0.2954376717 | 1.29778E-06 |
| *TLX3* | 0.295377895521153 | 1.30449E-06 |
| *CABC1* | -0.2952915372 | 1.31425E-06 |
| *DHX16* | 0.295282708148743 | 1.31525E-06 |
| *IL17RC* | -0.2952482963 | 1.31916E-06 |
| *MSTO2P* | 0.29519172032367 | 1.32562E-06 |
| *CHRNA9* | 0.295150370336773 | 1.33035E-06 |
| *SSX2IP* | 0.29512569834306 | 1.33318E-06 |
| *ESPNL* | -0.2949975426 | 1.34799E-06 |
| *C2orf24* | -0.2949644632 | 1.35184E-06 |
| *MXD4* | -0.2949337013 | 1.35543E-06 |
| *TCF12* | 0.294873143390876 | 1.36252E-06 |
| *C1orf190* | -0.2948517783 | 1.36503E-06 |
| *CDKAL1* | 0.294791490482554 | 1.37213E-06 |
| *NAGLU* | -0.2947418002 | 1.37802E-06 |
| *XDH* | 0.294645063039725 | 1.38954E-06 |
| *DPP6* | -0.2945943286 | 1.39562E-06 |
| *ABL2* | 0.29449033608827 | 1.40816E-06 |
| *NME5* | -0.2944706283 | 1.41055E-06 |
| *C5orf30* | 0.294433251255896 | 1.41509E-06 |
| *ACACB* | -0.2943298041 | 1.42773E-06 |
| *PITX2* | 0.294275331009006 | 1.43443E-06 |
| *ZNF618* | 0.294164708263088 | 1.44813E-06 |
| *ATP6V0A1* | -0.2940846272 | 1.45813E-06 |
| *NUDT7* | -0.2940454119 | 1.46305E-06 |
| *USP9X* | 0.294019110644579 | 1.46635E-06 |
| *PPP5C* | 0.293872909922601 | 1.48487E-06 |
| *SLC16A11* | -0.2938672010 | 1.4856E-06 |
| *NKX6-1* | 0.293810125842823 | 1.49289E-06 |
| *TNNT1* | 0.293800922803934 | 1.49407E-06 |
| *BTBD1* | 0.293709729497102 | 1.5058E-06 |
| *MRPL3* | 0.293685575670392 | 1.50893E-06 |
| *MAZ* | 0.29360496008421 | 1.51939E-06 |
| *GAN* | 0.293452586660712 | 1.53936E-06 |
| *CRYZL1* | -0.2934510545 | 1.53956E-06 |
| *KCNAB2* | 0.292987585008406 | 1.60187E-06 |
| *USP14* | 0.292786425945817 | 1.62966E-06 |
| *C21orf57* | -0.2927674006 | 1.63231E-06 |
| *HEBP1* | -0.2927572593 | 1.63372E-06 |
| *TMEM140* | -0.2927555960 | 1.63396E-06 |
| *FUBP1* | 0.292742498368412 | 1.63578E-06 |
| *ILK* | -0.2927039596 | 1.64118E-06 |
| *ASMTL* | -0.2925613573 | 1.66129E-06 |
| *RIBC2* | 0.292543369811821 | 1.66384E-06 |
| *IL1F9* | 0.292479701054849 | 1.67291E-06 |
| *NAPRT1* | -0.2924776712 | 1.6732E-06 |
| *DUT* | 0.29243998715361 | 1.67859E-06 |
| *MAGEA6* | 0.292425950436209 | 1.6806E-06 |
| *PFDN5* | -0.2923991624 | 1.68445E-06 |
| *DCAF12* | 0.2923151961 | 1.69656E-06 |
| *ACOT7* | 0.292265244480662 | 1.70381E-06 |
| *SEC62* | -0.2921193307 | 1.72514E-06 |
| *GABARAPL1* | -0.2920517325 | 1.7351E-06 |
| *ATP1A4* | -0.2920360562 | 1.73742E-06 |
| *MALT1* | 0.292008825186557 | 1.74146E-06 |
| *ENTPD1* | -0.2919811323 | 1.74557E-06 |
| *LXN* | -0.2918969000 | 1.75814E-06 |
| *TMEM38B* | 0.291889402884537 | 1.75927E-06 |
| *CYB5R1* | -0.2918691266 | 1.76231E-06 |
| *BAZ1B* | 0.291789998774376 | 1.77422E-06 |
| *LOC388152* | 0.29171701273367 | 1.78528E-06 |
| *UBE2A* | 0.291662193215316 | 1.79363E-06 |
| *NUDT19* | 0.29160221606699 | 1.8028E-06 |
| *VILL* | -0.2915316424 | 1.81366E-06 |
| *SPDYE3* | 0.291430264186678 | 1.82936E-06 |
| *FARSA* | 0.291389249250071 | 1.83575E-06 |
| *CNTF* | 0.291342669238671 | 1.84303E-06 |
| *CA5BP* | 0.291267485412925 | 1.85484E-06 |
| *FAM161A* | 0.291115511628089 | 1.87894E-06 |
| *TLR5* | -0.2909981088 | 1.89776E-06 |
| *C2orf81* | -0.2909275630 | 1.90916E-06 |
| *KCNK7* | -0.2908541041 | 1.9211E-06 |
| *SLC24A3* | -0.2908478394 | 1.92212E-06 |
| *OXNAD1* | 0.29083187851401 | 1.92472E-06 |
| *APOO* | 0.290772912175059 | 1.93437E-06 |
| *EGFL8* | -0.2907146363 | 1.94396E-06 |
| *ZNF200* | 0.290647887590634 | 1.95499E-06 |
| *LOC80154* | 0.290632775095342 | 1.95749E-06 |
| *BZW2* | 0.290595308182119 | 1.96372E-06 |
| *SOAT1* | 0.290563487232099 | 1.96902E-06 |
| *HSD11B1L* | -0.2904725047 | 1.98426E-06 |
| *VAT1* | -0.2904257883 | 1.99212E-06 |
| *HMGB1* | 0.290389961517922 | 1.99818E-06 |
| *EBP* | 0.290379746735585 | 1.99991E-06 |
| *ZSCAN22* | 0.290347924037898 | 2.0053E-06 |
| *CRELD1* | -0.2903039420 | 2.01278E-06 |
| *IGFBP4* | -0.2901121202 | 2.04572E-06 |
| *CBX2* | 0.290091737647913 | 2.04925E-06 |
| *PPM1M* | -0.2900454483 | 2.05729E-06 |
| *NACC1* | 0.289974050265427 | 2.06975E-06 |
| *CCL16* | -0.2899540569 | 2.07325E-06 |
| *PTPN1* | 0.28994855506216 | 2.07422E-06 |
| *NUCB1* | -0.2899232483 | 2.07866E-06 |
| *KIAA0586* | 0.289919980051008 | 2.07923E-06 |
| *XPOT* | 0.289914195319244 | 2.08025E-06 |
| *C5orf13* | 0.289875227413525 | 2.08711E-06 |
| *IL3RA* | -0.2897724981 | 2.10531E-06 |
| *C9orf109* | 0.289753143186728 | 2.10875E-06 |
| *TSPYL1* | -0.2896971722 | 2.11875E-06 |
| *TMEM50B* | -0.2895641532 | 2.14268E-06 |
| *TBC1D7* | 0.289564051984439 | 2.1427E-06 |
| *SUOX* | -0.2895072793 | 2.15299E-06 |
| *ZNF25* | -0.2894862604 | 2.15681E-06 |
| *CXorf38* | 0.289244333057407 | 2.20128E-06 |
| *GARNL3* | -0.2892133991 | 2.20703E-06 |
| *ZYG11A* | 0.289113396390291 | 2.22571E-06 |
| *TRIM34* | -0.2890290982 | 2.24157E-06 |
| *EDEM1* | 0.28897079626868 | 2.25261E-06 |
| *FBXO34* | 0.288942581156669 | 2.25797E-06 |
| *RAI2* | -0.2889121206 | 2.26377E-06 |
| *FLJ33630* | -0.2888225550 | 2.2809E-06 |
| *CLIP3* | -0.2888214438 | 2.28112E-06 |
| *ZNF114* | 0.288784965339138 | 2.28813E-06 |
| *SERHL2* | -0.2886753874 | 2.30933E-06 |
| *ASAH1* | -0.2886072263 | 2.3226E-06 |
| *ATP2B1* | 0.288576428421004 | 2.32863E-06 |
| *TMEM91* | -0.2885212976 | 2.33945E-06 |
| *GALE* | 0.288511772903544 | 2.34132E-06 |
| *DEPDC4* | 0.288504420714923 | 2.34277E-06 |
| *MBNL2* | -0.2882802593 | 2.38732E-06 |
| *PAXIP1* | 0.288194392642871 | 2.4046E-06 |
| *FN3K* | -0.2881681954 | 2.4099E-06 |
| *NOL10* | 0.288162486084511 | 2.41105E-06 |
| *MAGOH* | 0.288119259742438 | 2.41982E-06 |
| *B3GALT4* | -0.2880561822 | 2.43267E-06 |
| *GNPNAT1* | 0.287944628131757 | 2.45554E-06 |
| *PGRMC2* | -0.2879008032 | 2.46459E-06 |
| *C3orf67* | 0.287895541455189 | 2.46568E-06 |
| *NUP37* | 0.287864163947733 | 2.47217E-06 |
| *CDC42SE1* | 0.287644254390364 | 2.51817E-06 |
| *PPP1R14A* | -0.2876311679 | 2.52094E-06 |
| *THRA* | -0.2875853230 | 2.53064E-06 |
| *FBXW5* | -0.2875827156 | 2.53119E-06 |
| *SLC25A13* | 0.287561660312106 | 2.53566E-06 |
| *C21orf34* | -0.2873739381 | 2.57584E-06 |
| *PRLHR* | -0.2873275315 | 2.58586E-06 |
| *ACAT1* | -0.2872979249 | 2.59228E-06 |
| *RNASE4* | -0.2872210315 | 2.60901E-06 |
| *FASTKD3* | 0.287156380829376 | 2.62316E-06 |
| *PMAIP1* | 0.287065094596053 | 2.64326E-06 |
| *CA11* | -0.2869818839 | 2.66171E-06 |
| *SEC24A* | 0.286966133830965 | 2.66522E-06 |
| *RPP40* | 0.286919150799532 | 2.6757E-06 |
| *TTC26* | 0.286859890186917 | 2.68898E-06 |
| *C20orf20* | 0.286808607664121 | 2.70053E-06 |
| *SERBP1* | 0.286808032212674 | 2.70066E-06 |
| *BOC* | -0.2867353789 | 2.71709E-06 |
| *IL33* | -0.2867243012 | 2.71961E-06 |
| *GTF2H2C* | 0.286696335209108 | 2.72597E-06 |
| *FBXL15* | -0.2866342071 | 2.74014E-06 |
| *PSMB2* | 0.286581309504683 | 2.75227E-06 |
| *KIAA1586* | 0.286508469240283 | 2.76905E-06 |
| *CD151* | -0.2863557026 | 2.80456E-06 |
| *TPMT* | 0.286343182762097 | 2.80749E-06 |
| *ZNF280C* | 0.286152766186483 | 2.8524E-06 |
| *TRADD* | -0.2861112181 | 2.86229E-06 |
| *MTA2* | 0.28609219804269 | 2.86683E-06 |
| *DMBX1* | 0.285993891584244 | 2.8904E-06 |
| *STUB1* | -0.2858657806 | 2.92139E-06 |
| *ZNF592* | 0.28578875058783 | 2.94017E-06 |
| *HSPB8* | -0.2857670345 | 2.94549E-06 |
| *PAPOLA* | 0.285756146012152 | 2.94816E-06 |
| *RNF4* | 0.28575044945085 | 2.94956E-06 |
| *TM4SF19* | 0.285673807078534 | 2.96842E-06 |
| *TNS3* | 0.28551449521236 | 3.008E-06 |
| *C12orf49* | 0.285383772057949 | 3.04085E-06 |
| *UBC* | -0.2853381102 | 3.05241E-06 |
| *FOXD1* | 0.285282222368274 | 3.06661E-06 |
| *TH1L* | 0.285275159149297 | 3.06841E-06 |
| *PRPS1L1* | 0.285253796901474 | 3.07386E-06 |
| *C2orf58* | -0.2852434299 | 3.0765E-06 |
| *SIKE1* | 0.2852223034174 | 3.08191E-06 |
| *HAPLN2* | -0.2851237483 | 3.10722E-06 |
| *ITPKA* | 0.285103479696024 | 3.11245E-06 |
| *VPS33B* | 0.285065045406351 | 3.12239E-06 |
| *TRERF1* | 0.28498353351584 | 3.14358E-06 |
| *ASPA* | -0.2849617124 | 3.14927E-06 |
| *TAF4* | 0.284917672524246 | 3.1608E-06 |
| *EXOSC8* | 0.284895855752157 | 3.16652E-06 |
| *ELK4* | 0.28488615532715 | 3.16907E-06 |
| *ADH5* | -0.2848565907 | 3.17685E-06 |
| *LAS1L* | 0.28475174666306 | 3.20457E-06 |
| *KDSR* | -0.2846744754 | 3.22516E-06 |
| *RNASEH1* | 0.284665785748705 | 3.22748E-06 |
| *HSP90AA1* | 0.28465117599977 | 3.23139E-06 |
| *LOC90586* | -0.2846473221 | 3.23242E-06 |
| *PDE1B* | -0.2845964521 | 3.24607E-06 |
| *CSAG1* | 0.284557505641068 | 3.25656E-06 |
| *GMFB* | 0.284528849986234 | 3.26429E-06 |
| *SLC48A1* | -0.2845236864 | 3.26569E-06 |
| *DNAJB2* | -0.2845180868 | 3.2672E-06 |
| *CREBL2* | -0.2844773579 | 3.27824E-06 |
| *ACTR2* | 0.284374562499742 | 3.30625E-06 |
| *NFU1* | -0.2843621976 | 3.30963E-06 |
| *TP53TG5* | -0.2842940487 | 3.32835E-06 |
| *LOC678655* | -0.2842619399 | 3.3372E-06 |
| *PDLIM2* | -0.2842592578 | 3.33794E-06 |
| *PPIAL4C* | 0.284247722565034 | 3.34113E-06 |
| *MAGEA3* | 0.28413824226899 | 3.37151E-06 |
| *RAMP1* | -0.2841325659 | 3.37309E-06 |
| *CNOT6* | 0.283969302473437 | 3.41892E-06 |
| *KLF15* | -0.2838851002 | 3.44278E-06 |
| *CX3CL1* | -0.2836761466 | 3.50269E-06 |
| *ASPHD2* | 0.283663581257592 | 3.50633E-06 |
| *DLEC1* | -0.2836604243 | 3.50724E-06 |
| *TMEM33* | 0.28361020899952 | 3.5218E-06 |
| *C11orf52* | -0.2834399208 | 3.57162E-06 |
| *C2orf67* | -0.2833056329 | 3.61137E-06 |
| *C14orf142* | 0.283068798766131 | 3.68252E-06 |
| *ZNF625* | 0.283029484783019 | 3.69446E-06 |
| *MAPK3* | -0.2830178924 | 3.69798E-06 |
| *LONRF2* | -0.2829346279 | 3.72341E-06 |
| *PDLIM7* | -0.2829130537 | 3.73003E-06 |
| *HLF* | -0.2828506150 | 3.74924E-06 |
| *GSN* | -0.2828225281 | 3.75791E-06 |
| *ZNF124* | 0.282659078761981 | 3.80876E-06 |
| *MAP3K9* | 0.28257885575817 | 3.83396E-06 |
| *TUSC2* | -0.2825258580 | 3.85069E-06 |
| *ZNF85* | 0.282337054674992 | 3.91087E-06 |
| *TCEAL3* | -0.2823128657 | 3.91864E-06 |
| *SLC19A1* | 0.282232729531454 | 3.9445E-06 |
| *ANXA2P2* | 0.282189514107831 | 3.95852E-06 |
| *GPR133* | -0.2820912500 | 3.99056E-06 |
| *DCK* | 0.282078367035021 | 3.99478E-06 |
| *MICB* | 0.282077694679934 | 3.995E-06 |
| *KCND1* | -0.2820252835 | 4.01221E-06 |
| *DNAJC2* | 0.282017679429065 | 4.01471E-06 |
| *MARK3* | 0.2819369317686 | 4.04138E-06 |
| *CDKL5* | 0.281928721117992 | 4.0441E-06 |
| *B3GNT8* | -0.2819155685 | 4.04846E-06 |
| *CMAH* | -0.2818975739 | 4.05444E-06 |
| *SPIN4* | 0.281880362873136 | 4.06016E-06 |
| *SEPHS1* | 0.281817449556374 | 4.08115E-06 |
| *DDX46* | 0.281814052069353 | 4.08228E-06 |
| *RMND5B* | -0.2817892419 | 4.09059E-06 |
| *FRG2B* | 0.281778613070787 | 4.09415E-06 |
| *WRNIP1* | 0.281777911591562 | 4.09439E-06 |
| *TMEM80* | -0.2817211628 | 4.11347E-06 |
| *MYL6* | -0.2815241778 | 4.18035E-06 |
| *SIL1* | -0.2814877332 | 4.19283E-06 |
| *ZSCAN18* | -0.2814264202 | 4.21392E-06 |
| *RNASEH2C* | -0.2812894306 | 4.2614E-06 |
| *C1orf54* | -0.2811826120 | 4.29878E-06 |
| *PUS3* | -0.2811635883 | 4.30547E-06 |
| *CAMK1* | -0.2810836013 | 4.3337E-06 |
| *C10orf119* | 0.280910453794174 | 4.39543E-06 |
| *ALS2CL* | -0.2808448018 | 4.41905E-06 |
| *SCN2B* | -0.2808375153 | 4.42168E-06 |
| *TPM3* | 0.280719552948129 | 4.46445E-06 |
| *SURF1* | -0.2803793768 | 4.59001E-06 |
| *RPL34* | -0.2803666910 | 4.59476E-06 |
| *ANXA2P1* | 0.280217296297839 | 4.65101E-06 |
| *ARL5B* | 0.280204972723907 | 4.65568E-06 |
| *RNASEN* | 0.280186447967298 | 4.66271E-06 |
| *PLIN4* | -0.2801653566 | 4.67072E-06 |
| *FAM111A* | 0.280127230416677 | 4.68524E-06 |
| *UBE2K* | 0.280115416989409 | 4.68975E-06 |
| *XPA* | -0.2800195335 | 4.72649E-06 |
| *CIR1* | -0.2799429616 | 4.75602E-06 |
| *RIPK2* | 0.279907176736812 | 4.76989E-06 |
| *DNASE1L3* | -0.2798605059 | 4.78802E-06 |
| *EAF1* | 0.279851653697032 | 4.79147E-06 |
| *TMBIM4* | -0.2797946735 | 4.81372E-06 |
| *NDFIP1* | -0.2797037628 | 4.84942E-06 |
| *ANKLE1* | 0.279577579006396 | 4.8994E-06 |
| *IREB2* | 0.279386197760183 | 4.97613E-06 |
| *SNRPG* | 0.279302517074391 | 5.01004E-06 |
| *AP4E1* | 0.279164146221612 | 5.06659E-06 |
| *POU5F1* | 0.279155422386109 | 5.07017E-06 |
| *CD300LG* | -0.2790298125 | 5.12207E-06 |
| *QRICH2* | 0.278963543457371 | 5.14965E-06 |
| *KDM2B* | 0.278682082471664 | 5.26839E-06 |
| *UPK3A* | -0.2786502574 | 5.28198E-06 |
| *MOBKL1B* | 0.278633468478952 | 5.28916E-06 |
| *GDE1* | -0.2786194837 | 5.29515E-06 |
| *LSM4* | 0.278598899812168 | 5.30398E-06 |
| *SF3A3* | 0.278588643165146 | 5.30838E-06 |
| *HDHD3* | -0.2785490669 | 5.32541E-06 |
| *ADCY4* | -0.2785298531 | 5.33369E-06 |
| *C1orf96* | 0.278453407637652 | 5.36677E-06 |
| *PHF1* | -0.2784167174 | 5.38272E-06 |
| *POLR3A* | 0.278413110534046 | 5.38429E-06 |
| *C11orf1* | -0.2783949843 | 5.39219E-06 |
| *PGD* | 0.27797710052454 | 5.57734E-06 |
| *HIST1H1D* | 0.277924311992233 | 5.60115E-06 |
| *PDK2* | -0.2778883271 | 5.61744E-06 |
| *PHYHD1* | -0.2778139574 | 5.65125E-06 |
| *SLC35B1* | 0.277812640427914 | 5.65185E-06 |
| *VRK2* | 0.277807657765828 | 5.65412E-06 |
| *U2AF1* | 0.277793450059103 | 5.66061E-06 |
| *TET3* | 0.277773614427989 | 5.66967E-06 |
| *LOC649330* | 0.277749833538702 | 5.68056E-06 |
| *SLMO2* | 0.277554378419639 | 5.77078E-06 |
| *CMTM5* | -0.2775488463 | 5.77335E-06 |
| *LOC388588* | -0.2774967403 | 5.79764E-06 |
| *DNAJC11* | 0.277409242908797 | 5.83865E-06 |
| *HIPK4* | -0.2773996689 | 5.84316E-06 |
| *SGPL1* | 0.277306772037888 | 5.88703E-06 |
| *DYNLRB2* | -0.2772816869 | 5.89893E-06 |
| *RALGPS2* | 0.277254461017588 | 5.91188E-06 |
| *TMIE* | -0.2772389403 | 5.91927E-06 |
| *SELENBP1* | -0.2772181705 | 5.92917E-06 |
| *HEXDC* | -0.2772036515 | 5.9361E-06 |
| *GSPT1* | 0.277187843792001 | 5.94366E-06 |
| *SYNPO* | -0.2771484417 | 5.96253E-06 |
| *ART4* | -0.2771076023 | 5.98216E-06 |
| *STK4* | 0.27705980659229 | 6.0052E-06 |
| *FAM91A1* | 0.277053058924481 | 6.00846E-06 |
| *GPR89B* | 0.276992835648091 | 6.03763E-06 |
| *CPO* | -0.2769739681 | 6.0468E-06 |
| *ISG20L2* | 0.276924882297381 | 6.07071E-06 |
| *BMP6* | -0.2769158062 | 6.07514E-06 |
| *EFEMP2* | -0.2768413691 | 6.1116E-06 |
| *CYP20A1* | -0.2767308084 | 6.16613E-06 |
| *RAMP3* | -0.2766938618 | 6.18446E-06 |
| *ZNF556* | 0.276663195895197 | 6.19971E-06 |
| *TRIM24* | 0.276615780697868 | 6.22336E-06 |
| *MID2* | -0.2765858424 | 6.23834E-06 |
| *TTLL4* | 0.276436895993612 | 6.31336E-06 |
| *TRMT2B* | 0.276434296682809 | 6.31468E-06 |
| *SETD7* | -0.2764321282 | 6.31578E-06 |
| *IFI35* | -0.2763904622 | 6.33693E-06 |
| *DHCR24* | 0.276338387558113 | 6.36345E-06 |
| *BNC1* | 0.276268133476205 | 6.39941E-06 |
| *OPTC* | -0.2762662032 | 6.4004E-06 |
| *SRRM1* | 0.276243232633777 | 6.4122E-06 |
| *DNM2* | 0.27620723608745 | 6.43073E-06 |
| *FAM174A* | -0.2761972783 | 6.43586E-06 |
| *GNAI3* | 0.276027929958424 | 6.5238E-06 |
| *ZBTB7A* | -0.2759957044 | 6.54066E-06 |
| *CGREF1* | -0.2759779620 | 6.54996E-06 |
| *IQCC* | 0.275824974518856 | 6.63069E-06 |
| *PHF5A* | 0.275740024912906 | 6.67593E-06 |
| *FAM134C* | -0.2756588954 | 6.7194E-06 |
| *EPS8L2* | -0.2756539580 | 6.72206E-06 |
| *KLHDC9* | -0.2756434353 | 6.72772E-06 |
| *UBE2V2* | 0.275605560052816 | 6.74813E-06 |
| *DCP1B* | -0.2755785716 | 6.76271E-06 |
| *ZNF486* | 0.275394565086722 | 6.86292E-06 |
| *SLC25A4* | -0.2753156245 | 6.90634E-06 |
| *A2M* | -0.2752676457 | 6.93286E-06 |
| *PALM* | -0.2752657846 | 6.93389E-06 |
| *SERP2* | -0.2751654775 | 6.98966E-06 |
| *CCDC117* | 0.275056003651577 | 7.051E-06 |
| *KANK3* | -0.2750104730 | 7.07667E-06 |
| *UBXN1* | -0.2749569262 | 7.10697E-06 |
| *RSRC1* | 0.274903819245251 | 7.13714E-06 |
| *CCDC43* | 0.274895792159341 | 7.14171E-06 |
| *C5orf45* | -0.2748745393 | 7.15382E-06 |
| *HEATR3* | 0.274862021785546 | 7.16097E-06 |
| *MYOM1* | -0.2747383150 | 7.23194E-06 |
| *PCDH9* | 0.274647522623603 | 7.28446E-06 |
| *VWA1* | -0.2745230708 | 7.35703E-06 |
| *FBXO25* | -0.2745208378 | 7.35834E-06 |
| *D2HGDH* | -0.2744297920 | 7.41188E-06 |
| *RAVER1* | 0.274364489589684 | 7.4505E-06 |
| *STIP1* | 0.27427703917348 | 7.50253E-06 |
| *SRD5A1* | 0.274257038711656 | 7.51448E-06 |
| *SMTN* | -0.2742301311 | 7.53058E-06 |
| *BMX* | -0.2740637623 | 7.63087E-06 |
| *MIOS* | 0.274034715761327 | 7.64851E-06 |
| *HDAC6* | 0.274017586073442 | 7.65893E-06 |
| *SYNCRIP* | 0.274013122449832 | 7.66165E-06 |
| *HNRNPU* | 0.273978264971441 | 7.6829E-06 |
| *PTPLAD1* | 0.27386445042009 | 7.75269E-06 |
| *CABP1* | -0.2738534977 | 7.75944E-06 |
| *PSMG1* | 0.273821374336302 | 7.77926E-06 |
| *TPSG1* | -0.2737377270 | 7.8311E-06 |
| *ARID5A* | -0.2737104415 | 7.84809E-06 |
| *ODF3B* | -0.2736966096 | 7.85671E-06 |
| *FAM122B* | 0.273633218081116 | 7.89634E-06 |
| *KCTD2* | -0.2736084221 | 7.91189E-06 |
| *GNL3* | 0.273582487915517 | 7.92819E-06 |
| *CCDC14* | 0.273577428017279 | 7.93137E-06 |
| *SMARCC1* | 0.273484076704147 | 7.99033E-06 |
| *MYH11* | -0.2734708384 | 7.99872E-06 |
| *FIP1L1* | 0.273286606433143 | 8.11641E-06 |
| *NFXL1* | 0.273259400490526 | 8.13393E-06 |
| *C5orf32* | -0.2732162647 | 8.16177E-06 |
| *TMEM88* | -0.2731456506 | 8.20756E-06 |
| *ADAM17* | 0.273113377876105 | 8.22857E-06 |
| *DCAF8* | -0.2730837974 | 8.24786E-06 |
| *TIMM8A* | 0.273024633983398 | 8.28659E-06 |
| *PDCD4* | -0.2729262574 | 8.35137E-06 |
| *DHRS3* | -0.2728528058 | 8.40005E-06 |
| *RRP1B* | 0.272791257217096 | 8.44105E-06 |
| *LASS4* | -0.2727727648 | 8.45341E-06 |
| *FUK* | -0.2727431704 | 8.47321E-06 |
| *NME1* | 0.272720251472925 | 8.48859E-06 |
| *NR3C2* | -0.2727101022 | 8.4954E-06 |
| *RNF180* | -0.2726510720 | 8.53514E-06 |
| *PTGER3* | -0.2725811360 | 8.58245E-06 |
| *PBX1* | -0.2725456467 | 8.60656E-06 |
| *HSPB1* | -0.2725413050 | 8.60951E-06 |
| *POPDC2* | -0.2724452352 | 8.67511E-06 |
| *GANAB* | 0.272293332123579 | 8.77979E-06 |
| *PREB* | -0.2722870709 | 8.78413E-06 |
| *CLPX* | 0.272239510003444 | 8.81717E-06 |
| *ZNF19* | -0.2721806825 | 8.8582E-06 |
| *NEUROG2* | 0.272149007810932 | 8.88037E-06 |
| *PRR18* | 0.272142504528033 | 8.88492E-06 |
| *NBPF9* | 0.27206957641248 | 8.93618E-06 |
| *KIAA1755* | -0.2720655518 | 8.93902E-06 |
| *YARS* | 0.271871218879076 | 9.07703E-06 |
| *GPRASP1* | -0.2718296914 | 9.10679E-06 |
| *FAM175A* | -0.2717959482 | 9.13103E-06 |
| *TAF2* | 0.271545699524802 | 9.31276E-06 |
| *C16orf88* | 0.271479273021975 | 9.36157E-06 |
| *LOC221710* | 0.271379397493242 | 9.43542E-06 |
| *CDK8* | 0.271375247794803 | 9.4385E-06 |
| *CDCA7L* | 0.27135227727681 | 9.45557E-06 |
| *HIST1H2BN* | 0.271277727479752 | 9.51116E-06 |
| *MLL4* | 0.271263877486886 | 9.52153E-06 |
| *IDUA* | -0.2712581073 | 9.52585E-06 |
| *SNRNP48* | 0.271239138086623 | 9.54006E-06 |
| *CEP97* | 0.271196345456608 | 9.57221E-06 |
| *GPR157* | 0.271187492603815 | 9.57887E-06 |
| *CCDC107* | -0.2711759916 | 9.58753E-06 |
| *ATP13A3* | 0.2711668117039 | 9.59445E-06 |
| *MOBKL2C* | -0.2711394439 | 9.61511E-06 |
| *ATXN2L* | 0.271082986605566 | 9.65786E-06 |
| *ZBTB43* | 0.271036829746541 | 9.69294E-06 |
| *ANKRD9* | 0.271025682431522 | 9.70143E-06 |
| *PLCXD1* | 0.270904925351158 | 9.79387E-06 |
| *MGST2* | -0.2706975497 | 9.95456E-06 |
| *IPMK* | 0.270622801710428 | 1.00131E-05 |
| *RBBP8* | 0.270478952720627 | 1.01267E-05 |
| *ENDOD1* | -0.2704709442 | 1.0133E-05 |
| *TAF12* | 0.270456986248044 | 1.01441E-05 |
| *ZNF507* | 0.270414293346562 | 1.01781E-05 |
| *TGS1* | 0.27029911452938 | 1.02704E-05 |
| *LOC286367* | -0.2702933922 | 1.0275E-05 |
| *ANXA2P3* | 0.270255812800295 | 1.03052E-05 |
| *GNG7* | -0.2702329718 | 1.03237E-05 |
| *C6orf150* | 0.270175023083127 | 1.03706E-05 |
| *NFYA* | 0.270138302106635 | 1.04005E-05 |
| *FUNDC2* | -0.2700447647 | 1.04769E-05 |
| *ZSCAN29* | 0.270013145582142 | 1.05029E-05 |
| *DDX20* | 0.270001896877652 | 1.05121E-05 |
| *CCDC19* | 0.269974313737576 | 1.05348E-05 |
| *ZNF208* | -0.2698482817 | 1.06392E-05 |
| *CRKL* | 0.269670356199615 | 1.07881E-05 |
| *NFASC* | -0.2695687287 | 1.08741E-05 |
| *NRIP2* | -0.2695416343 | 1.08971E-05 |
| *SPPL3* | -0.2694849582 | 1.09455E-05 |
| *PRPF40A* | 0.269483323537289 | 1.09469E-05 |
| *GLDC* | 0.26947981850871 | 1.09499E-05 |
| *ENTPD5* | 0.269370517097426 | 1.10437E-05 |
| *SH3GLB2* | -0.2693467967 | 1.10641E-05 |
| *MAP4K4* | 0.269338484066816 | 1.10713E-05 |
| *EXOSC2* | 0.26929042559485 | 1.11129E-05 |
| *NAA15* | 0.269216673270194 | 1.1177E-05 |
| *FASN* | 0.269212498297817 | 1.11807E-05 |
| *C22orf41* | -0.2691986269 | 1.11928E-05 |
| *LOXL2* | 0.269186014268363 | 1.12038E-05 |
| *CBR4* | -0.2691751361 | 1.12133E-05 |
| *ABCE1* | 0.269129329582923 | 1.12534E-05 |
| *C9orf95* | -0.2690596853 | 1.13147E-05 |
| *TWISTNB* | 0.269018623542247 | 1.13509E-05 |
| *DDOST* | 0.269004600398747 | 1.13633E-05 |
| *PMS2CL* | 0.268953783243209 | 1.14084E-05 |
| *PHLDB1* | -0.2689163826 | 1.14417E-05 |
| *EEF1E1* | 0.268896170953658 | 1.14597E-05 |
| *SEMA3G* | -0.2688752077 | 1.14784E-05 |
| *LYAR* | 0.268862807484856 | 1.14895E-05 |
| *ETV4* | 0.26884623032655 | 1.15044E-05 |
| *SACS* | 0.268827263635153 | 1.15214E-05 |
| *LOC572558* | -0.2687960548 | 1.15494E-05 |
| *AARS2* | 0.268655749547205 | 1.16762E-05 |
| *C20orf194* | -0.2686458440 | 1.16852E-05 |
| *KCNJ14* | 0.268596627828222 | 1.17301E-05 |
| *CLSTN2* | -0.2685786614 | 1.17465E-05 |
| *PIGA* | 0.268576333098514 | 1.17486E-05 |
| *TAF1A* | 0.268512966772898 | 1.18066E-05 |
| *FAM171A2* | 0.26848595982619 | 1.18315E-05 |
| *JMY* | -0.2683084403 | 1.19959E-05 |
| *DMGDH* | -0.2681281553 | 1.2165E-05 |
| *NR1H2* | -0.2679577102 | 1.23271E-05 |
| *HIST1H2BM* | 0.267919314992344 | 1.23638E-05 |
| *PDE8A* | 0.26790710185591 | 1.23756E-05 |
| *PLEKHA8* | 0.267869135408079 | 1.24121E-05 |
| *CHCHD10* | -0.2678442678 | 1.2436E-05 |
| *SERGEF* | -0.2678199928 | 1.24595E-05 |
| *C1orf74* | 0.267784106691724 | 1.24942E-05 |
| *ITPR3* | 0.267780143135041 | 1.2498E-05 |
| *C10orf54* | -0.2676401647 | 1.26344E-05 |
| *CHERP* | 0.267575654966494 | 1.26977E-05 |
| *C14orf180* | -0.2675611659 | 1.2712E-05 |
| *C1GALT1* | 0.267495848905628 | 1.27764E-05 |
| *HLTF* | 0.267450817901433 | 1.28211E-05 |
| *C17orf104* | 0.267409762876513 | 1.28619E-05 |
| *C1QTNF1* | -0.2674012110 | 1.28704E-05 |
| *SLC7A1* | 0.267303235869861 | 1.29684E-05 |
| *PARM1* | -0.2673001804 | 1.29715E-05 |
| *YIF1B* | 0.267251336158834 | 1.30206E-05 |
| *PALB2* | 0.267226259240124 | 1.30459E-05 |
| *AQP7* | -0.2672130047 | 1.30593E-05 |
| *C22orf30* | 0.267179970015489 | 1.30927E-05 |
| *MRPS30* | 0.267175117957258 | 1.30976E-05 |
| *TCOF1* | 0.267152325827739 | 1.31207E-05 |
| *GLIPR1L2* | -0.2671439277 | 1.31292E-05 |
| *TCF25* | -0.2668748944 | 1.34051E-05 |
| *LINS1* | 0.26684501970527 | 1.34361E-05 |
| *KCNK3* | -0.2667761638 | 1.35078E-05 |
| *TOMM5* | 0.266735685934745 | 1.35501E-05 |
| *ACADS* | -0.2667026051 | 1.35847E-05 |
| *TATDN3* | -0.2666947663 | 1.35929E-05 |
| *RTTN* | 0.266690600572314 | 1.35973E-05 |
| *CLN6* | 0.266618451782406 | 1.36733E-05 |
| *CLTB* | -0.2665867173 | 1.37068E-05 |
| *FAM134A* | -0.2665601989 | 1.37349E-05 |
| *SUSD3* | -0.2665570992 | 1.37381E-05 |
| *SNRPC* | 0.26655365376175 | 1.37418E-05 |
| *LRRC70* | -0.2664761317 | 1.38242E-05 |
| *CDH24* | 0.266432331403903 | 1.3871E-05 |
| *USP10* | 0.266371617004696 | 1.39361E-05 |
| *ITPKB* | -0.2660861634 | 1.42461E-05 |
| *MAP3K1* | 0.266056872945901 | 1.42783E-05 |
| *ZNF642* | 0.266044949645696 | 1.42914E-05 |
| *METTL7A* | -0.2660207301 | 1.43181E-05 |
| *FKTN* | 0.265998207343425 | 1.43429E-05 |
| *INMT* | -0.2659377097 | 1.44099E-05 |
| *SPATS2* | 0.265905492114822 | 1.44456E-05 |
| *EHBP1L1* | -0.2657793258 | 1.45866E-05 |
| *HS3ST3A1* | 0.265777297473642 | 1.45888E-05 |
| *CCT8* | 0.265559820418102 | 1.48348E-05 |
| *ZCCHC24* | -0.2655341524 | 1.48641E-05 |
| *MS4A2* | -0.2655263299 | 1.48731E-05 |
| *STK17B* | 0.265518584754562 | 1.48819E-05 |
| *C19orf47* | 0.265495275187348 | 1.49086E-05 |
| *TMEM129* | -0.2654711815 | 1.49362E-05 |
| *CEBPD* | -0.2654004550 | 1.50176E-05 |
| *EIF1* | -0.2653878462 | 1.50321E-05 |
| *GPR35* | -0.2653614016 | 1.50627E-05 |
| *RUVBL2* | 0.265342170929722 | 1.5085E-05 |
| *GCOM1* | -0.2653004317 | 1.51334E-05 |
| *UBN1* | 0.265247663139825 | 1.51948E-05 |
| *RNFT2* | 0.265163404569937 | 1.52934E-05 |
| *DMRTA2* | 0.265037863539665 | 1.54414E-05 |
| *ACR* | -0.2650339709 | 1.5446E-05 |
| *HAUS1* | 0.264969524839918 | 1.55225E-05 |
| *WDR3* | 0.26487668316159 | 1.56334E-05 |
| *PYCR1* | 0.264859059926096 | 1.56545E-05 |
| *RPA2* | 0.264744321093931 | 1.57928E-05 |
| *CSK* | 0.264667036466378 | 1.58866E-05 |
| *BECN1* | -0.2645978826 | 1.59709E-05 |
| *TPP1* | -0.2645311062 | 1.60527E-05 |
| *SLC26A6* | 0.264507831791222 | 1.60814E-05 |
| *C11orf9* | 0.26449494166394 | 1.60972E-05 |
| *ZNF444* | -0.2644418136 | 1.61628E-05 |
| *RLF* | 0.264440884613662 | 1.6164E-05 |
| *ZNF587* | 0.264379136505063 | 1.62405E-05 |
| *CNN1* | -0.2643403560 | 1.62888E-05 |
| *PRR14* | -0.2643129091 | 1.6323E-05 |
| *CDRT15P* | 0.264268061983337 | 1.63791E-05 |
| *KLHL10* | -0.2642445366 | 1.64085E-05 |
| *OTUD6B* | 0.26421534609305 | 1.64452E-05 |
| *AP3B1* | 0.26420601642527 | 1.64569E-05 |
| *CES2* | -0.2640873691 | 1.66068E-05 |
| *PGM3* | 0.264084424664353 | 1.66106E-05 |
| *MYOD1* | 0.264050637519483 | 1.66535E-05 |
| *FTSJ1* | 0.264048723570383 | 1.66559E-05 |
| *PANK2* | 0.263866401935416 | 1.68895E-05 |
| *RGPD1* | 0.263802207405024 | 1.69724E-05 |
| *PLEK2* | 0.263778370091401 | 1.70033E-05 |
| *EZR* | 0.263671373905107 | 1.71427E-05 |
| *LRRC2* | -0.2636655417 | 1.71503E-05 |
| *ITIH5* | -0.2636399454 | 1.71838E-05 |
| *RBPMS* | -0.2634876746 | 1.73845E-05 |
| *KIAA0317* | 0.263472000842587 | 1.74053E-05 |
| *MEIS1* | -0.2634622201 | 1.74183E-05 |
| *ARSJ* | 0.263391543864329 | 1.75123E-05 |
| *SETD5* | 0.263390739667819 | 1.75134E-05 |
| *EIF2AK1* | 0.263388435229508 | 1.75165E-05 |
| *SPATA5L1* | 0.263326147096234 | 1.75998E-05 |
| *RETSAT* | -0.2632300554 | 1.77291E-05 |
| *RNF146* | -0.2631581210 | 1.78264E-05 |
| *DENND2C* | 0.263137283038756 | 1.78547E-05 |
| *HOXB13* | 0.263116592405565 | 1.78829E-05 |
| *RASA4* | -0.2631067426 | 1.78963E-05 |
| *LOC402377* | 0.263088415464844 | 1.79212E-05 |
| *RPA1* | 0.262979682077161 | 1.80701E-05 |
| *DNAJC4* | -0.2629550062 | 1.81041E-05 |
| *NPR1* | -0.2627452397 | 1.83951E-05 |
| *SNORD1C* | 0.262682549806388 | 1.84829E-05 |
| *C17orf96* | 0.262609298859015 | 1.85861E-05 |
| *SOCS4* | 0.262571589405472 | 1.86394E-05 |
| *TNPO3* | 0.262521743263846 | 1.87101E-05 |
| *HDAC2* | 0.262506773059764 | 1.87313E-05 |
| *FAM49B* | 0.262454712225668 | 1.88055E-05 |
| *ACBD5* | 0.262397605053479 | 1.88872E-05 |
| *C11orf46* | -0.2623410794 | 1.89684E-05 |
| *C7orf44* | 0.262290851965248 | 1.90408E-05 |
| *LETM2* | 0.262251140311395 | 1.90982E-05 |
| *KCNAB1* | -0.2622431799 | 1.91098E-05 |
| *TEX10* | 0.262240430078861 | 1.91137E-05 |
| *ZNF749* | 0.262204746447547 | 1.91655E-05 |
| *FHAD1* | 0.262129623036239 | 1.9275E-05 |
| *CACNA1H* | -0.2620609180 | 1.93757E-05 |
| *CISD2* | 0.26204440789275 | 1.93999E-05 |
| *GUSBL2* | 0.262019463924306 | 1.94366E-05 |
| *PTPRN2* | -0.2619925881 | 1.94762E-05 |
| *PPP2CA* | 0.261939993981091 | 1.9554E-05 |
| *NCOA6* | 0.261893521157658 | 1.96229E-05 |
| *HELB* | 0.261777422038258 | 1.97962E-05 |
| *PKIG* | -0.2617319390 | 1.98645E-05 |
| *MPV17L2* | 0.261697086368799 | 1.99169E-05 |
| *XYLB* | 0.261588745757878 | 2.00809E-05 |
| *C14orf174* | 0.261482799777894 | 2.02424E-05 |
| *LOC399959* | -0.2614729967 | 2.02574E-05 |
| *PAGE5* | 0.26134937122637 | 2.04476E-05 |
| *USP49* | 0.261346832447829 | 2.04515E-05 |
| *ZNF675* | 0.261220256219063 | 2.0648E-05 |
| *DCTN6* | -0.2612123987 | 2.06603E-05 |
| *C16orf87* | 0.261173706418109 | 2.07207E-05 |
| *NEDD1* | 0.261167898118881 | 2.07298E-05 |
| *BEST1* | -0.2611407887 | 2.07723E-05 |
| *BTD* | -0.2611235478 | 2.07993E-05 |
| *KLRB1* | -0.2611040381 | 2.083E-05 |
| *EEF1D* | -0.2610878204 | 2.08555E-05 |
| *ELOVL5* | 0.261047761522704 | 2.09187E-05 |
| *LOC92249* | -0.2609514971 | 2.10712E-05 |
| *JOSD1* | 0.260950689956604 | 2.10725E-05 |
| *FAM120AOS* | -0.2608691357 | 2.12025E-05 |
| *NBN* | 0.260760860124457 | 2.13763E-05 |
| *LIMD1* | 0.260665501445801 | 2.15305E-05 |
| *INTS7* | 0.260643226728374 | 2.15667E-05 |
| *CHADL* | -0.2606339514 | 2.15818E-05 |
| *SERPINB6* | -0.2606333131 | 2.15828E-05 |
| *TYRO3* | 0.260587163835167 | 2.1658E-05 |
| *MGC12982* | 0.260572576404956 | 2.16818E-05 |
| *TDG* | 0.260555115445595 | 2.17103E-05 |
| *RPL10A* | -0.2605549358 | 2.17106E-05 |
| *APOBEC3D* | -0.2603765352 | 2.20042E-05 |
| *A4GALT* | -0.2603233869 | 2.20924E-05 |
| *TCEAL6* | -0.2602142562 | 2.22746E-05 |
| *PPP2R5A* | -0.2602091316 | 2.22832E-05 |
| *LOC344595* | -0.2602054752 | 2.22893E-05 |
| *MRPS11* | 0.260173240076383 | 2.23434E-05 |
| *NIP7* | 0.260125559400769 | 2.24237E-05 |
| *GAA* | -0.2599871818 | 2.26581E-05 |
| *FAM138B* | -0.2598508270 | 2.28915E-05 |
| *OTUD3* | 0.259769301002533 | 2.3032E-05 |
| *ZNF823* | 0.259664492639687 | 2.3214E-05 |
| *FAM110A* | 0.259630180895436 | 2.32738E-05 |
| *ZNF207* | 0.259466098405771 | 2.35621E-05 |
| *RECQL* | 0.259367313564174 | 2.37373E-05 |
| *UTP18* | 0.25936258570587 | 2.37457E-05 |
| *COL24A1* | 0.259354652142198 | 2.37598E-05 |
| *MLYCD* | -0.2593095979 | 2.38402E-05 |
| *BRD4* | 0.259260519184483 | 2.3928E-05 |
| *KCND3* | -0.2592099391 | 2.40189E-05 |
| *ZNF215* | 0.259187995510712 | 2.40584E-05 |
| *MAF1* | -0.2591812755 | 2.40705E-05 |
| *VANGL1* | 0.259135785027677 | 2.41526E-05 |
| *TMEM115* | -0.2590620853 | 2.42863E-05 |
| *LRRC34* | -0.2590075925 | 2.43856E-05 |
| *RAD1* | 0.258990386563715 | 2.4417E-05 |
| *LRTOMT* | -0.2589035181 | 2.45763E-05 |
| *MAST1* | 0.2588808443325 | 2.4618E-05 |
| *TFAP4* | 0.258742624739849 | 2.48738E-05 |
| *SPTBN4* | -0.2587385443 | 2.48814E-05 |
| *C12orf62* | -0.2587352040 | 2.48876E-05 |
| *NBPF15* | 0.258726355871536 | 2.49041E-05 |
| *PLXNA1* | 0.25871380305121 | 2.49275E-05 |
| *BOLA1* | -0.2586330371 | 2.50784E-05 |
| *TARS2* | 0.258555559549823 | 2.52241E-05 |
| *POU4F1* | 0.258539856396942 | 2.52537E-05 |
| *RAB5B* | -0.2585105318 | 2.5309E-05 |
| *RAD51C* | 0.258424721133077 | 2.54718E-05 |
| *CYP4V2* | -0.2583276720 | 2.5657E-05 |
| *ZNF761* | 0.258323591876641 | 2.56648E-05 |
| *PSEN2* | -0.2582755962 | 2.57569E-05 |
| *EEF1A1* | -0.2582475800 | 2.58109E-05 |
| *TMEM2* | 0.258232364012304 | 2.58402E-05 |
| *C1orf57* | -0.2581652757 | 2.59698E-05 |
| *ASAP1* | 0.258140926198918 | 2.60171E-05 |
| *MAP3K7* | 0.258140620513341 | 2.60176E-05 |
| *VAMP2* | -0.2580079033 | 2.62764E-05 |
| *CLINT1* | 0.258004979375411 | 2.62821E-05 |
| *CCAR1* | 0.258003968372267 | 2.62841E-05 |
| *PANK1* | 0.257941985594348 | 2.64058E-05 |
| *HIST1H4L* | 0.257927132894517 | 2.64351E-05 |
| *ADPGK* | 0.257919457925688 | 2.64502E-05 |
| *RABL2A* | -0.2578811336 | 2.65259E-05 |
| *ZNF738* | 0.257857505534289 | 2.65726E-05 |
| *SGSM1* | -0.2578446637 | 2.6598E-05 |
| *DIP2B* | 0.257773139645303 | 2.67401E-05 |
| *SGK196* | 0.257728361375276 | 2.68295E-05 |
| *BAK1* | 0.257715870780603 | 2.68544E-05 |
| *RPAP2* | 0.257690684688347 | 2.69048E-05 |
| *KCTD21* | -0.2576767268 | 2.69328E-05 |
| *SESN1* | -0.2576271702 | 2.70323E-05 |
| *YWHAE* | 0.257608277433675 | 2.70704E-05 |
| *LDOC1* | -0.2575984468 | 2.70902E-05 |
| *P2RX4* | -0.2575769376 | 2.71336E-05 |
| *FAM108C1* | 0.257448099431061 | 2.73949E-05 |
| *ZNF524* | -0.2573868684 | 2.752E-05 |
| *MGC45800* | 0.257348704469396 | 2.75982E-05 |
| *HOXD13* | 0.257311680483829 | 2.76743E-05 |
| *FMOD* | -0.2572633259 | 2.77739E-05 |
| *TGFBR3* | -0.2572622839 | 2.77761E-05 |
| *ADAMTS8* | -0.2572436896 | 2.78145E-05 |
| *ACAA1* | -0.2571878437 | 2.79301E-05 |
| *LRRC23* | -0.2571592220 | 2.79896E-05 |
| *PIGQ* | -0.2571291576 | 2.80522E-05 |
| *CSRP1* | -0.2570647618 | 2.81867E-05 |
| *VMA21* | 0.256953744771529 | 2.842E-05 |
| *CDC42* | 0.256868377712172 | 2.86006E-05 |
| *ABCD3* | 0.256809830447786 | 2.87251E-05 |
| *TOP1P1* | 0.256761536572909 | 2.88282E-05 |
| *ARFGAP2* | -0.2567405208 | 2.88732E-05 |
| *TWIST1* | 0.256738111705975 | 2.88784E-05 |
| *NXNL1* | -0.2566761828 | 2.90113E-05 |
| *LOC100302650* | -0.2566256198 | 2.91202E-05 |
| *WBP1* | -0.2565876281 | 2.92024E-05 |
| *SAAL1* | 0.256565618976211 | 2.925E-05 |
| *TPSB2* | -0.2565396670 | 2.93064E-05 |
| *TRRAP* | 0.256534606394248 | 2.93173E-05 |
| *NCRNA00169* | 0.256495476876981 | 2.94025E-05 |
| *LOC284441* | 0.256490506143239 | 2.94133E-05 |
| *MRTO4* | 0.256468120286466 | 2.94621E-05 |
| *C15orf17* | -0.2564520261 | 2.94973E-05 |
| *TRMT6* | 0.256438739295922 | 2.95263E-05 |
| *BYSL* | 0.256412036587151 | 2.95848E-05 |
| *CDK13* | 0.256297042258462 | 2.98378E-05 |
| *FLVCR1* | 0.25628121026821 | 2.98728E-05 |
| *PNPLA3* | 0.256224449259413 | 2.99986E-05 |
| *SHC2* | -0.2560014848 | 3.04975E-05 |
| *MEX3D* | 0.255977509701278 | 3.05516E-05 |
| *TXNIP* | -0.2559546137 | 3.06033E-05 |
| *SHMT1* | 0.255947184222223 | 3.06202E-05 |
| *GOLT1B* | 0.25582106942579 | 3.09069E-05 |
| *ENTPD7* | 0.255809949877417 | 3.09323E-05 |
| *CMA1* | -0.2556086292 | 3.13957E-05 |
| *NEIL2* | -0.2554508424 | 3.17634E-05 |
| *UMPS* | 0.25544210803394 | 3.17839E-05 |
| *GLCCI1* | 0.255422740807566 | 3.18293E-05 |
| *TLX2* | 0.255414754726322 | 3.18481E-05 |
| *WBP11P1* | 0.255403014572861 | 3.18757E-05 |
| *GGTA1* | -0.2554027641 | 3.18763E-05 |
| *ARSA* | -0.2553957624 | 3.18927E-05 |
| *FAM71D* | 0.255340803543785 | 3.20223E-05 |
| *ACYP1* | 0.255311249245353 | 3.20921E-05 |
| *ZMYM1* | 0.255275242722226 | 3.21774E-05 |
| *STRN* | 0.255261590959308 | 3.22098E-05 |
| *2-Mar* | -0.2552605370 | 3.22123E-05 |
| *ZNF121* | 0.255184789335883 | 3.23927E-05 |
| *SALL4* | 0.255132622913457 | 3.25175E-05 |
| *MITF* | -0.2548381445 | 3.32303E-05 |
| *ODC1* | 0.254817690461249 | 3.32803E-05 |
| *SHOX2* | 0.254800693505832 | 3.3322E-05 |
| *RBM14* | 0.254791078656887 | 3.33456E-05 |
| *LZTS2* | -0.2547663353 | 3.34063E-05 |
| *NAA16* | 0.254763288248047 | 3.34138E-05 |
| *PKN3* | 0.254711255804201 | 3.3542E-05 |
| *TSPAN7* | -0.2546976139 | 3.35756E-05 |
| *HNRNPUL1* | 0.254674916501016 | 3.36317E-05 |
| *AMT* | -0.2546479348 | 3.36985E-05 |
| *NPC1L1* | -0.2546265338 | 3.37516E-05 |
| *IQCH* | 0.254619663692002 | 3.37687E-05 |
| *PARP4* | 0.254499495481739 | 3.40683E-05 |
| *VEGFA* | 0.25448052725949 | 3.41158E-05 |
| *MLLT6* | -0.2544798747 | 3.41174E-05 |
| *NAA35* | 0.254475009455495 | 3.41296E-05 |
| *LRP8* | 0.254447274832453 | 3.41993E-05 |
| *RAF1* | 0.254446258194502 | 3.42018E-05 |
| *PAPD7* | 0.254431370895176 | 3.42392E-05 |
| *CCDC17* | -0.2543880735 | 3.43483E-05 |
| *CKMT2* | -0.2542539971 | 3.46882E-05 |
| *TSC22D1* | -0.2542278294 | 3.47549E-05 |
| *SLC40A1* | -0.2542004565 | 3.48248E-05 |
| *DDI2* | 0.25417831529567 | 3.48814E-05 |
| *HMGA2* | 0.254161227858341 | 3.49252E-05 |
| *HSPB11* | 0.25414664829993 | 3.49626E-05 |
| *ADAMTS20* | 0.254137738850169 | 3.49855E-05 |
| *AAGAB* | 0.25413666052507 | 3.49882E-05 |
| *LOC283174* | -0.2539606784 | 3.54428E-05 |
| *PHTF2* | 0.253959840302943 | 3.5445E-05 |
| *SIM1* | 0.253943811609235 | 3.54867E-05 |
| *L2HGDH* | 0.253922875123668 | 3.55412E-05 |
| *HIST1H2BI* | 0.253890317368886 | 3.56261E-05 |
| *TXNDC2* | 0.253883570600625 | 3.56438E-05 |
| *MESDC2* | 0.253852042159034 | 3.57262E-05 |
| *ABHD1* | -0.2538334978 | 3.57748E-05 |
| *HIST1H2BF* | 0.253806337830411 | 3.58461E-05 |
| *PRPSAP1* | 0.253768232549349 | 3.59463E-05 |
| *C1orf106* | 0.253749811565974 | 3.59949E-05 |
| *RFNG* | -0.2536959824 | 3.61371E-05 |
| *LTC4S* | -0.2536683033 | 3.62104E-05 |
| *ESAM* | -0.2536681248 | 3.62109E-05 |
| *SEC13* | 0.25365845685342 | 3.62366E-05 |
| *DCLRE1A* | 0.253634905813178 | 3.62991E-05 |
| *ACOX2* | -0.2535103419 | 3.66317E-05 |
| *EIF5AL1* | 0.253467596611364 | 3.67464E-05 |
| *EPAS1* | -0.2534579399 | 3.67724E-05 |
| *PRPF3* | 0.253443004878408 | 3.68126E-05 |
| *WBP11* | 0.253384281635678 | 3.69711E-05 |
| *RLIM* | 0.253361506668585 | 3.70328E-05 |
| *SCN4B* | -0.2533106129 | 3.71709E-05 |
| *XPO4* | 0.253287235078775 | 3.72345E-05 |
| *SLC6A15* | 0.253233594973885 | 3.73808E-05 |
| *ZNF32* | -0.2532191141 | 3.74204E-05 |
| *RNF8* | 0.253210130116741 | 3.7445E-05 |
| *VWF* | -0.2532088222 | 3.74486E-05 |
| *SLC43A1* | -0.2531606359 | 3.75807E-05 |
| *ADH1B* | -0.2531296165 | 3.7666E-05 |
| *RAB7L1* | -0.2530780143 | 3.78083E-05 |
| *TMUB2* | -0.2528861817 | 3.83417E-05 |
| *PDCD5* | 0.252876882084603 | 3.83678E-05 |
| *APOBEC3F* | -0.2528584172 | 3.84195E-05 |
| *FETUB* | -0.2528387544 | 3.84747E-05 |
| *HIST1H2AB* | 0.252796062624222 | 3.85948E-05 |
| *DSTN* | -0.2526840734 | 3.89114E-05 |
| *DMXL2* | 0.252643890499876 | 3.90256E-05 |
| *ANKRD34B* | 0.252636226689581 | 3.90475E-05 |
| *C15orf52* | -0.2526016977 | 3.91459E-05 |
| *PROKR1* | 0.252585497701699 | 3.91922E-05 |
| *ALDH2* | -0.2525824365 | 3.92009E-05 |
| *SLTM* | 0.252515435078302 | 3.93929E-05 |
| *PDIA3P* | 0.252461256703789 | 3.95487E-05 |
| *SPP1* | 0.252426650171174 | 3.96486E-05 |
| *FUS* | 0.252296151625869 | 4.00273E-05 |
| *LRWD1* | 0.252261828139882 | 4.01275E-05 |
| *EXOSC9* | 0.252243009816698 | 4.01825E-05 |
| *GLYATL1* | 0.252149048686391 | 4.04583E-05 |
| *C21orf2* | -0.2519403086 | 4.10774E-05 |
| *DHX33* | 0.251893138692866 | 4.12186E-05 |
| *PDE5A* | -0.2518905155 | 4.12264E-05 |
| *UTP15* | 0.251711008617044 | 4.17678E-05 |
| *FLJ42875* | -0.2517069454 | 4.17801E-05 |
| *C2orf78* | 0.251669613385084 | 4.18936E-05 |
| *CT45A1* | 0.251599545920085 | 4.21073E-05 |
| *RBCK1* | -0.2515890895 | 4.21393E-05 |
| *WBSCR17* | -0.2515575755 | 4.22359E-05 |
| *GNB4* | 0.251514217848056 | 4.2369E-05 |
| *ZFP2* | -0.2515087037 | 4.2386E-05 |
| *HOXD9* | -0.2515011875 | 4.24091E-05 |
| *CYYR1* | -0.2514160046 | 4.26721E-05 |
| *CMBL* | -0.2514122535 | 4.26837E-05 |
| *FOXE3* | 0.251410040001938 | 4.26906E-05 |
| *OLFML2A* | 0.251407138235974 | 4.26996E-05 |
| *HIC2* | 0.251403046699689 | 4.27123E-05 |
| *NUDT18* | -0.2513477671 | 4.28839E-05 |
| *MAN1C1* | -0.2512976727 | 4.304E-05 |
| *RUNX3* | 0.251287140669234 | 4.30729E-05 |
| *GRRP1* | -0.2512287868 | 4.32556E-05 |
| *SERPINB7* | 0.251219266775767 | 4.32854E-05 |
| *UQCRC2* | -0.2511899494 | 4.33775E-05 |
| *CIRBP* | -0.2511645421 | 4.34575E-05 |
| *GATA5* | -0.2511637983 | 4.34599E-05 |
| *MAGEB6* | 0.251056877576309 | 4.37979E-05 |
| *ENOPH1* | 0.250861140457962 | 4.44233E-05 |
| *LOC441089* | 0.2508418691909 | 4.44853E-05 |
| *PARP10* | -0.2508105639 | 4.45862E-05 |
| *CC2D2B* | -0.2507967532 | 4.46308E-05 |
| *NBPF4* | 0.250784771275722 | 4.46695E-05 |
| *HIST1H2BJ* | 0.250615104419304 | 4.52212E-05 |
| *C16orf5* | -0.2505562098 | 4.54143E-05 |
| *BRCC3* | 0.250512535708318 | 4.55579E-05 |
| *FAM136A* | 0.25047537154008 | 4.56804E-05 |
| *ZFP36* | -0.2503992316 | 4.59325E-05 |
| *CCDC134* | 0.250371196742548 | 4.60256E-05 |
| *C9orf41* | 0.250366794201146 | 4.60403E-05 |
| *CAPN3* | -0.2502808060 | 4.63272E-05 |
| *ARID3B* | 0.250266719205549 | 4.63743E-05 |
| *ARHGAP19* | 0.250232369359052 | 4.64895E-05 |
| *NBPF6* | 0.250113375838411 | 4.68906E-05 |
| *MAN2C1* | -0.2500061255 | 4.72549E-05 |
| *UBXN6* | -0.2499731980 | 4.73673E-05 |
| *SLC35D1* | 0.249957214500945 | 4.74219E-05 |
| *NCRNA00051* | -0.2498664786 | 4.77332E-05 |
| *KDELR3* | 0.249778536159193 | 4.80368E-05 |
| *MARS* | 0.249726906652854 | 4.82159E-05 |
| *ZNF440* | 0.249665873023808 | 4.84284E-05 |
| *USP33* | 0.24964778271922 | 4.84915E-05 |
| *HDAC5* | -0.2496048125 | 4.86418E-05 |
| *PFKFB4* | 0.249586558612593 | 4.87058E-05 |
| *C1orf144* | 0.249585102295484 | 4.87109E-05 |
| *CDK9* | -0.2495680227 | 4.87709E-05 |
| *LHPP* | -0.2494415406 | 4.9217E-05 |
| *WSCD2* | -0.2493423034 | 4.95697E-05 |
| *CD99L2* | -0.2493357107 | 4.95932E-05 |
| *ZCWPW1* | -0.2492127963 | 5.00336E-05 |
| *RPAP3* | 0.249192564319479 | 5.01065E-05 |
| *FAM173A* | -0.2490464950 | 5.06353E-05 |
| *PRKD3* | 0.249043514836745 | 5.06462E-05 |
| *AIP* | -0.2490279122 | 5.0703E-05 |
| *PPP4R2* | 0.248986739207141 | 5.08532E-05 |
| *FAM21C* | -0.2489778026 | 5.08858E-05 |
| *HMGXB3* | 0.248948330894577 | 5.09937E-05 |
| *MUSTN1* | -0.2489224725 | 5.10885E-05 |
| *MAML3* | -0.2488800958 | 5.12442E-05 |
| *UBQLNL* | -0.2488793101 | 5.12471E-05 |
| *HSPA4* | 0.248865303515601 | 5.12986E-05 |
| *FRG2* | 0.248843168237764 | 5.13802E-05 |
| *TCF23* | -0.2487551167 | 5.1706E-05 |
| *TMEM61* | -0.2486951834 | 5.19289E-05 |
| *HIST1H4D* | 0.248642585638009 | 5.21252E-05 |
| *METTL3* | 0.248613009155277 | 5.22359E-05 |
| *SDHD* | -0.2485092910 | 5.26259E-05 |
| *HDAC11* | -0.2484941757 | 5.26829E-05 |
| *PLEKHA6* | -0.2484472537 | 5.28604E-05 |
| *C16orf55* | 0.248393146361238 | 5.30658E-05 |
| *NCRNA00094* | -0.2483584693 | 5.31978E-05 |
| *SNRNP200* | 0.24835705579819 | 5.32032E-05 |
| *GLE1* | 0.248300987597248 | 5.34174E-05 |
| *UBAP2L* | 0.248245366362662 | 5.36306E-05 |
| *ZNF710* | 0.248209823948252 | 5.37673E-05 |
| *C1orf109* | 0.248154040884099 | 5.39825E-05 |
| *NPDC1* | -0.2481386725 | 5.40419E-05 |
| *ZNF81* | 0.248031539483072 | 5.44578E-05 |
| *KRT75* | 0.247945253641059 | 5.47951E-05 |
| *DPH3B* | 0.247925986391886 | 5.48706E-05 |
| *LOC145820* | -0.2478516333 | 5.51631E-05 |
| *ATP6V1E1* | -0.2478296498 | 5.52499E-05 |
| *ELMOD2* | 0.247744103912858 | 5.55888E-05 |
| *ZNF232* | 0.247690951775041 | 5.58003E-05 |
| *MT1G* | 0.247634966146698 | 5.6024E-05 |
| *ZNF217* | 0.247632379418269 | 5.60343E-05 |
| *MYO10* | 0.247631575981514 | 5.60376E-05 |
| *ANG* | -0.2475638733 | 5.63092E-05 |
| *ERI2* | 0.247386361310438 | 5.70273E-05 |
| *C1orf186* | -0.2473675076 | 5.71041E-05 |
| *DOCK10* | 0.247362992047441 | 5.71225E-05 |
| *VGF* | 0.247335348334037 | 5.72353E-05 |
| *NXF1* | -0.2473252823 | 5.72764E-05 |
| *MAPK10* | -0.2472344615 | 5.76486E-05 |
| *ITM2B* | -0.2472186708 | 5.77136E-05 |
| *CLK1* | -0.2472053612 | 5.77684E-05 |
| *MTP18* | 0.247199476624678 | 5.77926E-05 |
| *DBNDD2* | -0.2471689850 | 5.79184E-05 |
| *SERINC1* | -0.2470737980 | 5.83128E-05 |
| *NRN1L* | -0.2470542640 | 5.8394E-05 |
| *ZZZ3* | 0.246961214918991 | 5.87824E-05 |
| *PCYOX1* | -0.2469453715 | 5.88488E-05 |
| *BTNL9* | -0.2468659346 | 5.91827E-05 |
| *ZNF598* | 0.246837812949695 | 5.93013E-05 |
| *PPIEL* | -0.2468249950 | 5.93554E-05 |
| *CTH* | 0.246634519923592 | 6.01655E-05 |
| *DOPEY2* | 0.246606620203133 | 6.0285E-05 |
| *SPHAR* | -0.2465559802 | 6.05026E-05 |
| *GSTP1* | -0.2464951972 | 6.07646E-05 |
| *NFIA* | -0.2464629385 | 6.09041E-05 |
| *MYO5A* | 0.246420174066888 | 6.10895E-05 |
| *KIAA1377* | -0.2464192053 | 6.10938E-05 |
| *MTPAP* | 0.2464041954681 | 6.1159E-05 |
| *HIVEP3* | 0.24632035815261 | 6.15244E-05 |
| *CYP21A2* | -0.2463036511 | 6.15975E-05 |
| *EFCAB10* | 0.246288824502688 | 6.16624E-05 |
| *SYNPO2* | -0.2462825486 | 6.16899E-05 |
| *C1orf95* | -0.2462762957 | 6.17173E-05 |
| *ZNF358* | -0.2462760596 | 6.17183E-05 |
| *CXCL12* | -0.2462703470 | 6.17434E-05 |
| *SPATA7* | -0.2462603054 | 6.17874E-05 |
| *HDHD1A* | 0.246225129798153 | 6.1942E-05 |
| *RNF13* | -0.2461481957 | 6.22813E-05 |
| *EIF4EBP1* | 0.246127265448318 | 6.23739E-05 |
| *LMBRD1* | -0.2460166332 | 6.28656E-05 |
| *ST6GAL1* | -0.2459500959 | 6.3163E-05 |
| *KREMEN2* | 0.245949094066515 | 6.31675E-05 |
| *PRPF8* | 0.245891823727639 | 6.34246E-05 |
| *USP37* | 0.245883544559416 | 6.34619E-05 |
| *HIST1H4E* | 0.245867247117457 | 6.35352E-05 |
| *MT1H* | 0.245853531796532 | 6.35971E-05 |
| *NUP88* | 0.245718900583735 | 6.42069E-05 |
| *NXPH2* | 0.24563680194556 | 6.45815E-05 |
| *SFMBT1* | 0.245551447085122 | 6.49731E-05 |
| *AGFG2* | -0.2454798122 | 6.53035E-05 |
| *C15orf29* | 0.245262116953321 | 6.63173E-05 |
| *CAMK2N2* | 0.245195118689449 | 6.66323E-05 |
| *LRRC8E* | 0.245124808589966 | 6.69643E-05 |
| *ECE2* | 0.245099370685231 | 6.70849E-05 |
| *C3orf31* | 0.245083333875962 | 6.7161E-05 |
| *DLX2* | 0.245011360818239 | 6.75034E-05 |
| *BICC1* | 0.244976291719085 | 6.76709E-05 |
| *RPL23* | -0.2449233146 | 6.79246E-05 |
| *CTTN* | -0.2449168935 | 6.79554E-05 |
| *AZI1* | 0.244893446441788 | 6.8068E-05 |
| *MYL5* | -0.2447775715 | 6.86272E-05 |
| *CPE* | -0.2447569744 | 6.87271E-05 |
| *HSBP1L1* | -0.2447438004 | 6.8791E-05 |
| *NDUFC1* | -0.2447133895 | 6.89388E-05 |
| *USP39* | 0.244712345076834 | 6.89439E-05 |
| *NSUN2* | 0.244683402514072 | 6.90848E-05 |
| *SLC38A10* | -0.2446635882 | 6.91815E-05 |
| *TMEM189-UBE2V1* | 0.244617606997722 | 6.94063E-05 |
| *C10orf41* | -0.2446154974 | 6.94166E-05 |
| *C19orf26* | 0.244574011570782 | 6.962E-05 |
| *PRKCA* | 0.244528467248058 | 6.9844E-05 |
| *RASIP1* | -0.2445233007 | 6.98694E-05 |
| *CLN5* | -0.2445162975 | 6.99039E-05 |
| *AP1M1* | 0.244502332242206 | 6.99728E-05 |
| *NGB* | 0.244477051599693 | 7.00976E-05 |
| *TDRKH* | 0.244462223716972 | 7.01709E-05 |
| *ZDHHC1* | -0.2443704456 | 7.06263E-05 |
| *C1orf203* | -0.2442663177 | 7.11464E-05 |
| *RHOBTB3* | 0.244252109313428 | 7.12176E-05 |
| *NUDT5* | 0.244219128099941 | 7.13832E-05 |
| *PLN* | -0.2442071602 | 7.14434E-05 |
| *NHLRC4* | -0.2441846197 | 7.15569E-05 |
| *LCN10* | -0.2441809459 | 7.15754E-05 |
| *CDKN1C* | -0.2441441014 | 7.17613E-05 |
| *TGFB1I1* | -0.2441009860 | 7.19794E-05 |
| *KIF1B* | 0.244082139875698 | 7.2075E-05 |
| *SPPL2A* | 0.24406390110441 | 7.21676E-05 |
| *SMN2* | 0.244049158948783 | 7.22425E-05 |
| *UHMK1* | 0.244042804644115 | 7.22748E-05 |
| *C17orf85* | 0.244024819063122 | 7.23663E-05 |
| *CCDC58* | 0.243986256111944 | 7.25629E-05 |
| *H2AFJ* | -0.2439806912 | 7.25913E-05 |
| *ATP11B* | 0.243979592795267 | 7.2597E-05 |
| *ZNF670* | 0.243979145044157 | 7.25992E-05 |
| *PPM1J* | -0.2439373962 | 7.28128E-05 |
| *RFC1* | 0.243915391211138 | 7.29256E-05 |
| *SNRPD3* | 0.24388894718423 | 7.30613E-05 |
| *RPL36A* | 0.24379143502862 | 7.3564E-05 |
| *SIRT3* | -0.2436963512 | 7.40572E-05 |
| *RPL24* | -0.2436798964 | 7.41429E-05 |
| *PRPS1* | 0.243658467814512 | 7.42546E-05 |
| *IDI1* | 0.243655484911563 | 7.42702E-05 |
| *POLR3G* | 0.24363905972478 | 7.43559E-05 |
| *USP48* | 0.243626876979982 | 7.44196E-05 |
| *HPN* | -0.2436187343 | 7.44622E-05 |
| *ENPP3* | -0.2436178600 | 7.44667E-05 |
| *LRP5* | -0.2435937720 | 7.45928E-05 |
| *HAAO* | -0.2435767246 | 7.46822E-05 |
| *MTMR7* | -0.2435739920 | 7.46965E-05 |
| *C5orf43* | 0.243498138717439 | 7.50955E-05 |
| *RAB8A* | 0.243475090421211 | 7.52171E-05 |
| *RPL19* | -0.2434541756 | 7.53276E-05 |
| *CEP250* | 0.243422344427482 | 7.54961E-05 |
| *AGMAT* | 0.243391430204403 | 7.56601E-05 |
| *GABARAPL2* | -0.2433590656 | 7.58321E-05 |
| *NSF* | 0.243322661538555 | 7.60261E-05 |
| *ZC3H8* | 0.243310265413037 | 7.60922E-05 |
| *SUSD2* | -0.2433102096 | 7.60925E-05 |
| *SAMD4B* | 0.24327498292038 | 7.62808E-05 |
| *ZC3HAV1L* | 0.24326347373308 | 7.63424E-05 |
| *POLR3K* | 0.243232179651628 | 7.65101E-05 |
| *CTSG* | -0.2432279632 | 7.65327E-05 |
| *NR2F2* | -0.2432181969 | 7.65852E-05 |
| *RASL12* | -0.2430968444 | 7.72395E-05 |
| *NHEDC1* | -0.2430715452 | 7.73766E-05 |
| *RWDD4A* | -0.2430304994 | 7.75995E-05 |
| *CCRN4L* | 0.243017529898735 | 7.76701E-05 |
| *ADH4* | -0.2430168879 | 7.76736E-05 |
| *HIST1H3A* | 0.24299429647169 | 7.77966E-05 |
| *C3orf39* | -0.2429539637 | 7.80167E-05 |
| *ORMDL3* | -0.2429270120 | 7.81642E-05 |
| *PEG10* | 0.24276587479103 | 7.9051E-05 |
| *C15orf32* | 0.242751814723199 | 7.91289E-05 |
| *GLRX3* | 0.242722314412294 | 7.92924E-05 |
| *CX3CR1* | -0.2426836275 | 7.95074E-05 |
| *NMNAT3* | -0.2425711052 | 8.01356E-05 |
| *C9orf7* | -0.2425643174 | 8.01737E-05 |
| *PHF15* | -0.2424375685 | 8.08873E-05 |
| *RAD21L1* | 0.242420011264929 | 8.09867E-05 |
| *FAM89B* | -0.2423925190 | 8.11424E-05 |
| *C2orf28* | -0.2423547663 | 8.13568E-05 |
| *PRICKLE2* | -0.2423414819 | 8.14323E-05 |
| *VPS26B* | -0.2422565233 | 8.1917E-05 |
| *KIAA0430* | -0.2421659115 | 8.2437E-05 |
| *C16orf45* | -0.2421357125 | 8.2611E-05 |
| *ENY2* | 0.242115190920389 | 8.27294E-05 |
| *PTPRM* | -0.2419005733 | 8.39775E-05 |
| *CST3* | -0.2418962001 | 8.40032E-05 |
| *CCDC13* | -0.2418902943 | 8.40378E-05 |
| *C20orf160* | -0.2417885979 | 8.46357E-05 |
| *IER3IP1* | 0.241762738818528 | 8.47884E-05 |
| *RBM12B* | 0.241746795454087 | 8.48827E-05 |
| *TRIM26* | 0.241744297536126 | 8.48975E-05 |
| *CLEC14A* | -0.2416189692 | 8.56421E-05 |
| *MAS1L* | -0.2415789059 | 8.58814E-05 |
| *C17orf28* | -0.2415774762 | 8.58899E-05 |
| *COL11A1* | 0.241516932310357 | 8.62528E-05 |
| *SLC25A24* | 0.241503401437812 | 8.63341E-05 |
| *GGPS1* | -0.2414855215 | 8.64416E-05 |
| *PFKFB1* | 0.241480974278209 | 8.6469E-05 |
| *SDCCAG8* | -0.2414644682 | 8.65684E-05 |
| *ITFG3* | -0.2414593900 | 8.6599E-05 |
| *C7orf63* | -0.2414572007 | 8.66122E-05 |
| *SCRN2* | -0.2414420757 | 8.67035E-05 |
| *TBX18* | 0.24133623398392 | 8.73444E-05 |
| *ITGA4* | 0.241321609618645 | 8.74333E-05 |
| *LSM14B* | 0.241312031202094 | 8.74916E-05 |
| *FRMD5* | 0.24130863402653 | 8.75123E-05 |
| *CAD* | 0.241193323607159 | 8.82169E-05 |
| *FOXP1* | -0.2410130108 | 8.93295E-05 |
| *TGM4* | 0.240927753108214 | 8.98601E-05 |
| *PPP4R1L* | 0.24092208125202 | 8.98955E-05 |
| *LOC728643* | 0.240918228432086 | 8.99196E-05 |
| *WAPAL* | 0.240916127009548 | 8.99327E-05 |
| *PARK2* | -0.2409038202 | 9.00096E-05 |
| *RPL23P8* | -0.2408781550 | 9.01702E-05 |
| *C17orf93* | 0.240848433114587 | 9.03564E-05 |
| *TAF8* | 0.240731468345478 | 9.1093E-05 |
| *CNTNAP1* | -0.2404602452 | 9.28228E-05 |
| *MCCC2* | 0.240440129260716 | 9.29523E-05 |
| *AFG3L2* | 0.240438506878991 | 9.29627E-05 |
| *MGAT5B* | 0.240316139632466 | 9.37543E-05 |
| *HCFC1* | 0.240199603218211 | 9.45141E-05 |
| *SOX11* | 0.240180469854433 | 9.46394E-05 |
| *GJC2* | -0.2401588433 | 9.47812E-05 |
| *SP100* | -0.2401406848 | 9.49004E-05 |
| *FEZ2* | -0.2400828613 | 9.52809E-05 |
| *AMN1* | -0.2400228130 | 9.56777E-05 |
| *ZNF678* | 0.240015064699986 | 9.5729E-05 |
| *SELS* | 0.23992519640685 | 9.63259E-05 |
| *WRN* | 0.239898792797755 | 9.6502E-05 |
| *LUZP1* | 0.239848486783681 | 9.68382E-05 |
| *DHRS1* | -0.2397552430 | 9.74644E-05 |
| *GSTM3* | -0.2397292279 | 9.76398E-05 |
| *TMEM206* | 0.239691361021586 | 9.78956E-05 |
| *UBE2NL* | 0.239677390953539 | 9.79901E-05 |
| *MYH8* | 0.239670233121135 | 9.80386E-05 |
| *LIMS1* | 0.239662092173719 | 9.80937E-05 |
| *WNT16* | 0.239624483183802 | 9.83489E-05 |
| *EFCAB4B* | 0.239567475217112 | 9.87368E-05 |
| *C16orf62* | -0.2395652189 | 9.87522E-05 |
| *CCNJ* | 0.239558990858622 | 9.87947E-05 |
| *UBE2B* | -0.2394374051 | 9.96274E-05 |
| *SH3D19* | -0.2393807957 | 0.000100017 |
| *UBTD2* | 0.239365953982938 | 0.00010012 |
| *MYRIP* | -0.2393290360 | 0.000100375 |
| *C7orf52* | 0.239299242996787 | 0.000100582 |
| *PAGE2B* | 0.239204565198664 | 0.000101241 |
| *RPL35A* | -0.2391788507 | 0.00010142 |
| *RNH1* | -0.2391634429 | 0.000101528 |
| *HIGD1B* | -0.2391353924 | 0.000101724 |
| *CYP4F12* | -0.2391337914 | 0.000101736 |
| *RPL37A* | -0.2391305973 | 0.000101758 |
| *SOCS2* | -0.2391274115 | 0.00010178 |
| *CXorf36* | -0.2390856879 | 0.000102074 |
| *GLT25D1* | 0.239079319005454 | 0.000102118 |
| *TTLL5* | 0.23895364916375 | 0.000103006 |
| *MME* | 0.238949897283083 | 0.000103033 |
| *TPSAB1* | -0.2389399058 | 0.000103104 |
| *UBQLN1* | 0.238939894847934 | 0.000103104 |
| *PIGP* | -0.2389277657 | 0.00010319 |
| *PTGDS* | -0.2389049547 | 0.000103352 |
| *POP4* | 0.238859462555541 | 0.000103677 |
| *C14orf118* | 0.238801629719068 | 0.00010409 |
| *SMEK1* | 0.238780834774382 | 0.000104239 |
| *AMY2B* | -0.2387579702 | 0.000104403 |
| *KIAA1984* | -0.2384992225 | 0.000106278 |
| *C2CD3* | 0.238448968235327 | 0.000106646 |
| *ICAM2* | -0.2384318156 | 0.000106772 |
| *CNOT10* | 0.238370306745478 | 0.000107224 |
| *UFD1L* | 0.238354856316073 | 0.000107338 |
| *SGCA* | -0.2383444489 | 0.000107414 |
| *CYP24A1* | 0.238341433188011 | 0.000107437 |
| *EWSR1* | 0.238329492937723 | 0.000107525 |
| *MMP13* | 0.238320349772258 | 0.000107592 |
| *TMEM171* | 0.238316860412604 | 0.000107618 |
| *SLC20A2* | -0.2382537427 | 0.000108086 |
| *GPR176* | 0.238214166683301 | 0.00010838 |
| *C6orf186* | -0.2382047235 | 0.00010845 |
| *STRN4* | 0.238141554848784 | 0.000108921 |
| *RNFT1* | 0.238132777851995 | 0.000108987 |
| *MYO15B* | -0.2381317934 | 0.000108994 |
| *LOC442454* | -0.2380973399 | 0.000109252 |
| *ETFA* | 0.238053667905074 | 0.00010958 |
| *HIST1H3H* | 0.238050805632803 | 0.000109602 |
| *SNX21* | -0.2380365741 | 0.000109709 |
| *C16orf86* | -0.2379832289 | 0.000110111 |
| *PCBD1* | -0.2379568585 | 0.00011031 |
| *EXD1* | 0.237953291878893 | 0.000110337 |
| *C4orf10* | -0.2379041943 | 0.000110709 |
| *FAM160A2* | -0.2378762880 | 0.000110922 |
| *EDC3* | 0.237788599270436 | 0.00011159 |
| *FOXO1* | -0.2377493634 | 0.000111891 |
| *TOMM34* | 0.237639728535212 | 0.000112734 |
| *C7orf59* | -0.2376104922 | 0.00011296 |
| *ZSWIM2* | 0.237606261380344 | 0.000112993 |
| *N4BP2* | 0.237569971255006 | 0.000113274 |
| *CYP2U1* | -0.2374996786 | 0.00011382 |
| *NOLC1* | 0.237478163312609 | 0.000113988 |
| *RNASEL* | -0.2374743733 | 0.000114018 |
| *ANXA6* | -0.2374664413 | 0.00011408 |
| *CREG2* | 0.237448080963941 | 0.000114223 |
| *GNA14* | -0.2373590497 | 0.000114921 |
| *GNG5* | 0.23732014483421 | 0.000115227 |
| *FBRSL1* | -0.2373046501 | 0.000115349 |
| *NFKBIL1* | -0.2373003899 | 0.000115383 |
| *C7orf49* | 0.237287560519843 | 0.000115484 |
| *ACADVL* | -0.2372610138 | 0.000115694 |
| *SPNS2* | -0.2372371199 | 0.000115883 |
| *DPM1* | 0.237218100431188 | 0.000116034 |
| *RALY* | 0.237164899486765 | 0.000116457 |
| *STOM* | -0.2371086739 | 0.000116905 |
| *TPT1* | -0.2370448052 | 0.000117417 |
| *SLC25A20* | -0.2370246965 | 0.000117578 |
| *SUZ12* | 0.236956641157092 | 0.000118126 |
| *RNF216L* | 0.236941103499886 | 0.000118251 |
| *MRPL43* | -0.2369121076 | 0.000118485 |
| *ZNF492* | 0.236877202886278 | 0.000118768 |
| *LSM12* | 0.236845379164889 | 0.000119026 |
| *SSX4* | 0.236822792824613 | 0.00011921 |
| *SSX5* | 0.236820542913213 | 0.000119228 |
| *NSMCE1* | -0.2367810728 | 0.00011955 |
| *CCDC86* | 0.236778701989344 | 0.000119569 |
| *GTF2E1* | 0.236745354320739 | 0.000119842 |
| *ANO1* | -0.2367024186 | 0.000120193 |
| *KCNMB1* | -0.2366328494 | 0.000120765 |
| *LOC723972* | 0.23644061623983 | 0.000122358 |
| *C14orf34* | 0.23639902455683 | 0.000122705 |
| *ANK2* | -0.2363917587 | 0.000122766 |
| *FAM149A* | -0.2363816502 | 0.00012285 |
| *HECW2* | 0.236363334168387 | 0.000123004 |
| *VAPB* | 0.23631631082581 | 0.000123398 |
| *SEPX1* | -0.2362790909 | 0.000123712 |
| *NOC3L* | 0.236164183244718 | 0.000124683 |
| *TTC5* | 0.236146981906791 | 0.000124829 |
| *TRIB3* | 0.236146627174944 | 0.000124832 |
| *ENAM* | -0.2361347213 | 0.000124933 |
| *ABCF1* | 0.236038224500913 | 0.000125756 |
| *ATG2A* | -0.2360129875 | 0.000125972 |
| *TCP1* | 0.236002678467781 | 0.000126061 |
| *CLYBL* | -0.2359649019 | 0.000126385 |
| *TIGD2* | 0.235959608679472 | 0.00012643 |
| *LOC144571* | -0.2359458137 | 0.000126549 |
| *PBLD* | -0.2359098802 | 0.000126859 |
| *KLHDC2* | -0.2359013158 | 0.000126933 |
| *B3GNT5* | 0.235859367977132 | 0.000127295 |
| *ATOH8* | -0.2358122693 | 0.000127703 |
| *TAF13* | 0.235791310248165 | 0.000127885 |
| *LOC728758* | 0.235768348042561 | 0.000128085 |
| *FLJ36777* | -0.2357328345 | 0.000128394 |
| *LMBR1L* | -0.2357072334 | 0.000128618 |
| *FMO2* | -0.2355646913 | 0.000129869 |
| *TRAF4* | 0.235536618754971 | 0.000130116 |
| *NCRNA00028* | -0.2354457795 | 0.000130921 |
| *ZNF609* | 0.235443741969656 | 0.000130939 |
| *RNF111* | 0.235387183563996 | 0.000131443 |
| *SAP130* | 0.235368035207044 | 0.000131613 |
| *C11orf74* | -0.2353474409 | 0.000131797 |
| *HNRNPH3* | 0.235347341964361 | 0.000131798 |
| *COPS4* | -0.2352806241 | 0.000132396 |
| *KIAA0913* | -0.2352805264 | 0.000132397 |
| *HAT1* | 0.235190752799708 | 0.000133205 |
| *DMRT1* | 0.235127237542193 | 0.000133779 |
| *GALNTL4* | -0.2351183418 | 0.00013386 |
| *IFITM2* | -0.2350973705 | 0.00013405 |
| *FABP4* | -0.2350628189 | 0.000134365 |
| *ARRB1* | -0.2350213610 | 0.000134742 |
| *CLOCK* | 0.235007479604912 | 0.000134869 |
| *SCARNA12* | 0.234925213839218 | 0.000135623 |
| *LTF* | -0.2348910752 | 0.000135936 |
| *FURIN* | 0.234883936575849 | 0.000136002 |
| *P2RX1* | -0.2348366015 | 0.000136438 |
| *FAM157A* | 0.234820820252899 | 0.000136584 |
| *DIXDC1* | -0.2348135462 | 0.000136651 |
| *C9orf98* | -0.2347761364 | 0.000136998 |
| *ZNF394* | -0.2347594313 | 0.000137153 |
| *CASP8AP2* | 0.234714346292104 | 0.000137572 |
| *FAM103A1* | 0.234618751097361 | 0.000138464 |
| *SSX1* | 0.234592897003736 | 0.000138706 |
| *PGR* | -0.2345702338 | 0.000138919 |
| *PINK1* | -0.2345572664 | 0.000139041 |
| *DHODH* | 0.23454395846286 | 0.000139166 |
| *HIST1H4B* | 0.234463180431335 | 0.000139927 |
| *USP13* | 0.234443675951192 | 0.000140112 |
| *CSPP1* | 0.234328874731196 | 0.000141203 |
| *ATP13A2* | 0.234304593517034 | 0.000141434 |
| *ZNF560* | 0.234299479170558 | 0.000141483 |
| *BAG1* | -0.2342413910 | 0.000142039 |
| *SMOC2* | -0.2342216737 | 0.000142228 |
| *SLC16A10* | 0.234186562415418 | 0.000142566 |
| *MGAT1* | -0.2341285609 | 0.000143125 |
| *FBXO8* | -0.2340039295 | 0.000144333 |
| *TG* | 0.23396764944954 | 0.000144686 |
| *ESR1* | -0.2339666555 | 0.000144696 |
| *NCRNA00219* | -0.2339141408 | 0.000145209 |
| *SPAG8* | -0.2338504067 | 0.000145834 |
| *ANKRD13C* | 0.233846897817423 | 0.000145869 |
| *DTYMK* | 0.233815133783337 | 0.000146181 |
| *ATAD3B* | 0.233749032927106 | 0.000146834 |
| *CYP1B1* | -0.2337471647 | 0.000146852 |
| *MED26* | 0.233682278252825 | 0.000147495 |
| *HSF4* | -0.2336669733 | 0.000147647 |
| *C20orf24* | 0.233656357049977 | 0.000147753 |
| *ECSCR* | -0.2336546441 | 0.00014777 |
| *RND2* | -0.2335491827 | 0.000148823 |
| *BSCL2* | -0.2335395320 | 0.000148919 |
| *MARS2* | 0.233529066500716 | 0.000149024 |
| *PIP5K1P1* | 0.233366594049698 | 0.000150662 |
| *C2orf44* | 0.233344894006608 | 0.000150882 |
| *SHD* | 0.23334003984516 | 0.000150931 |
| *ZNRF2* | 0.233277297895989 | 0.000151569 |
| *HIST1H2AD* | 0.233270528863871 | 0.000151638 |
| *USP42* | 0.233203243288956 | 0.000152326 |
| *SORBS3* | -0.2331928992 | 0.000152432 |
| *PHF11* | -0.2331015220 | 0.00015337 |
| *RPL13AP3* | -0.2330763056 | 0.00015363 |
| *CBWD5* | 0.233050167311455 | 0.0001539 |
| *BHMT2* | -0.2329408274 | 0.000155034 |
| *CPSF3* | 0.232933818644936 | 0.000155107 |
| *SMC1B* | 0.232932084616796 | 0.000155125 |
| *RAB11A* | 0.232917908451898 | 0.000155273 |
| *UQCRB* | -0.2328994648 | 0.000155465 |
| *NKX2-8* | 0.232878014087473 | 0.000155689 |
| *ZHX2* | -0.2328570586 | 0.000155908 |
| *ANKLE2* | 0.232852121611604 | 0.00015596 |
| *DNAJA1* | 0.232829001035812 | 0.000156202 |
| *FLOT2* | -0.2328019469 | 0.000156486 |
| *NAA50* | 0.232754287661799 | 0.000156987 |
| *HIST2H2AC* | 0.232680294791783 | 0.000157768 |
| *SSX6* | 0.232674344067532 | 0.000157831 |
| *PAOX* | -0.2326629242 | 0.000157951 |
| *C12orf11* | 0.232641505817899 | 0.000158178 |
| *KLHDC8B* | -0.2326300233 | 0.0001583 |
| *PPP2R5C* | 0.232610252827275 | 0.00015851 |
| *NHLH1* | 0.232587270835477 | 0.000158754 |
| *FAM181B* | -0.2325871841 | 0.000158755 |
| *MFSD10* | -0.2325705298 | 0.000158933 |
| *CT45A5* | 0.232532964316617 | 0.000159333 |
| *PLEKHA3* | -0.2324760923 | 0.000159941 |
| *IFT20* | -0.2324706198 | 0.00016 |
| *C13orf27* | 0.232449098283272 | 0.000160231 |
| *AARSD1* | -0.2324221885 | 0.00016052 |
| *SLC45A4* | -0.2323153310 | 0.000161673 |
| *OSGIN1* | -0.2323095995 | 0.000161735 |
| *MYH4* | 0.232292465080981 | 0.00016192 |
| *ZNF788* | 0.232290750719264 | 0.000161939 |
| *PAFAH1B3* | 0.232288775476737 | 0.00016196 |
| *CBLN1* | -0.2322812089 | 0.000162042 |
| *ZC3H14* | 0.232259026091506 | 0.000162283 |
| *PPP4R1* | 0.232194435194253 | 0.000162986 |
| *GNAT2* | 0.232125906245601 | 0.000163735 |
| *DDHD1* | 0.232117601189551 | 0.000163826 |
| *ATP6V0E1* | -0.2320131766 | 0.000164974 |
| *DDX58* | -0.2319338301 | 0.000165851 |
| *OLFM3* | 0.231933404375414 | 0.000165856 |
| *ATP1A2* | -0.2318926761 | 0.000166308 |
| *STK35* | 0.231854579505258 | 0.000166732 |
| *BRAF* | 0.231822589217508 | 0.000167088 |
| *PLA2G7* | 0.23177899967928 | 0.000167576 |
| *REXO2* | -0.2317585875 | 0.000167804 |
| *SQSTM1* | -0.2317553800 | 0.00016784 |
| *IFITM3* | -0.2317485722 | 0.000167917 |
| *PTPRG* | 0.231700633256426 | 0.000168455 |
| *DDX27* | 0.23168819951284 | 0.000168595 |
| *PPP2R5D* | 0.231605827060652 | 0.000169524 |
| *CIRH1A* | 0.2315985419233 | 0.000169607 |
| *S100A5* | 0.231543672854562 | 0.000170229 |
| *UBE2N* | 0.231541572645603 | 0.000170253 |
| *EPM2A* | -0.2314933092 | 0.000170802 |
| *PPP3CB* | -0.2314367578 | 0.000171447 |
| *MED12L* | 0.231403302781776 | 0.00017183 |
| *HIST2H2AB* | 0.231334254665603 | 0.000172623 |
| *TSHB* | -0.2313321166 | 0.000172648 |
| *PPIF* | 0.23124891989008 | 0.000173607 |
| *DES* | -0.2312119818 | 0.000174035 |
| *NME4* | -0.2312085003 | 0.000174076 |
| *C3orf74* | 0.231150617845613 | 0.000174748 |
| *SLC25A12* | -0.2310438051 | 0.000175995 |
| *DPP7* | -0.2310420648 | 0.000176016 |
| *WISP1* | 0.231041010750779 | 0.000176028 |
| *ZNF770* | 0.230997392693108 | 0.00017654 |
| *TBX20* | 0.230990044910755 | 0.000176626 |
| *FAM92A1* | 0.230950446754877 | 0.000177093 |
| *C9orf170* | 0.230928564250969 | 0.000177351 |
| *MAPK8* | 0.230890017878429 | 0.000177806 |
| *YY2* | 0.230855528886228 | 0.000178214 |
| *DNAJC8* | 0.230845804703241 | 0.00017833 |
| *GJA4* | -0.2308223011 | 0.000178609 |
| *TSNAX* | -0.2307891158 | 0.000179003 |
| *PRKX* | 0.230702538132317 | 0.000180037 |
| *IDH3A* | 0.230686332034688 | 0.000180231 |
| *CREG1* | -0.2306810983 | 0.000180294 |
| *GATA1* | -0.2306317515 | 0.000180886 |
| *MAPK4* | -0.2306236713 | 0.000180983 |
| *NEK4* | 0.230565289723128 | 0.000181686 |
| *DTWD1* | -0.2305214094 | 0.000182217 |
| *UFM1* | 0.230506568392806 | 0.000182397 |
| *ALDH1A1* | -0.2305061073 | 0.000182402 |
| *STT3B* | 0.230491855012687 | 0.000182575 |
| *SLC12A4* | -0.2304905035 | 0.000182591 |
| *RUNX2* | 0.230428723313546 | 0.000183342 |
| *TEX15* | 0.230422991761804 | 0.000183412 |
| *GAS8* | -0.2303996123 | 0.000183697 |
| *ARHGEF17* | -0.2303754221 | 0.000183992 |
| *SLC7A11* | 0.23037225586785 | 0.00018403 |
| *POLH* | 0.230361199460992 | 0.000184166 |
| *HECW1* | 0.230311205239585 | 0.000184778 |
| *F10* | -0.2302868144 | 0.000185077 |
| *GAGE2D* | 0.230279649269907 | 0.000185165 |
| *TANC2* | 0.230267642807114 | 0.000185313 |
| *HUS1* | 0.230262738917342 | 0.000185373 |
| *MAP6* | -0.2300880233 | 0.000187533 |
| *HIGD2A* | -0.2300859144 | 0.00018756 |
| *ITPR2* | 0.23008080063893 | 0.000187623 |
| *LOC401588* | 0.23002984489808 | 0.000188258 |
| *HIVEP1* | 0.230026595505557 | 0.000188299 |
| *RAP2A* | 0.22998002854712 | 0.000188881 |
| *COBLL1* | -0.2299692001 | 0.000189016 |
| *LOC100130331* | 0.22996652301385 | 0.00018905 |
| *TFDP3* | 0.2299252312266 | 0.000189568 |
| *ABHD3* | 0.229922819554233 | 0.000189598 |
| *TSNAXIP1* | -0.2298818333 | 0.000190114 |
| *ARHGEF15* | -0.2298540240 | 0.000190464 |
| *ZNF460* | 0.229814083570599 | 0.000190968 |
| *SLC30A7* | 0.229808846910696 | 0.000191035 |
| *TRPM7* | 0.229806079967734 | 0.00019107 |
| *FUT8* | 0.229783675507059 | 0.000191353 |
| *LTBP4* | -0.2295890078 | 0.000193835 |
| *SPNS3* | -0.2295544927 | 0.000194278 |
| *C5orf51* | 0.229513000083161 | 0.000194812 |
| *GPR26* | -0.2294881250 | 0.000195132 |
| *DDB2* | -0.2294532507 | 0.000195583 |
| *PTPDC1* | 0.229433821832137 | 0.000195834 |
| *SUPT6H* | -0.2294034117 | 0.000196228 |
| *ALMS1* | 0.229374592036607 | 0.000196602 |
| *CRY1* | 0.229339188859089 | 0.000197063 |
| *FAM38B* | 0.229287775657554 | 0.000197734 |
| *DPY19L3* | 0.22925760831508 | 0.000198128 |
| *SMARCD3* | -0.2292262701 | 0.000198539 |
| *RAB33A* | -0.2292175191 | 0.000198653 |
| *NEXN* | -0.2292062613 | 0.000198801 |
| *BTN1A1* | 0.229188266424807 | 0.000199038 |
| *MAGOHB* | 0.229174939956041 | 0.000199213 |
| *FAM36A* | -0.2291724049 | 0.000199246 |
| *SMARCA5* | 0.229139134069896 | 0.000199684 |
| *ZNF589* | -0.2291103922 | 0.000200064 |
| *FHL5* | -0.2290565263 | 0.000200776 |
| *AIG1* | -0.2290513955 | 0.000200844 |
| *RASD2* | -0.2290444719 | 0.000200936 |
| *ICMT* | 0.229037117245038 | 0.000201034 |
| *C21orf49* | -0.2289890994 | 0.000201672 |
| *PPP2R5E* | 0.228976877560771 | 0.000201834 |
| *DKFZP434L187* | 0.228957629019856 | 0.000202091 |
| *EED* | 0.228925393423401 | 0.000202521 |
| *ARL4D* | -0.2289125034 | 0.000202693 |
| *RERG* | -0.2288561445 | 0.000203448 |
| *FBN2* | 0.228839517309947 | 0.000203671 |
| *RALA* | 0.228836015523489 | 0.000203718 |
| *TMEM17* | -0.2288145622 | 0.000204007 |
| *COL18A1* | -0.2287527284 | 0.00020484 |
| *CDKN2C* | 0.228745020638221 | 0.000204944 |
| *TSPAN15* | -0.2287425725 | 0.000204977 |
| *ZNF599* | 0.228623745415223 | 0.000206588 |
| *SNHG10* | 0.228525727650995 | 0.000207926 |
| *SMYD2* | 0.228502808777341 | 0.000208241 |
| *MIF4GD* | -0.2284436302 | 0.000209053 |
| *SH3BGRL* | -0.2284150698 | 0.000209447 |
| *PPARGC1A* | -0.2284040195 | 0.000209599 |
| *SPTLC2* | 0.228346198695033 | 0.000210398 |
| *SLC2A1* | 0.228328932355608 | 0.000210637 |
| *EXOC5* | 0.228297094394222 | 0.000211079 |
| *LOC100130581* | -0.2282871837 | 0.000211217 |
| *COPS3* | 0.22826423870815 | 0.000211536 |
| *EFEMP1* | -0.2280769249 | 0.000214157 |
| *SKIL* | 0.228061214516009 | 0.000214378 |
| *N6AMT2* | -0.2280572273 | 0.000214434 |
| *PSMC4* | 0.22798583283964 | 0.000215443 |
| *FEZ1* | -0.2279257556 | 0.000216294 |
| *TOR1AIP1* | -0.2279237963 | 0.000216322 |
| *CSRP3* | 0.227910751478247 | 0.000216508 |
| *KDM4A* | 0.227866058488581 | 0.000217144 |
| *C2CD2* | -0.2278544844 | 0.000217309 |
| *ACAD11* | -0.2278050496 | 0.000218016 |
| *AMDHD2* | -0.2277665508 | 0.000218567 |
| *KLC3* | 0.227758029552164 | 0.000218689 |
| *COX7C* | -0.2276252431 | 0.000220603 |
| *SLC36A1* | 0.227588513773864 | 0.000221135 |
| *ARL6IP4* | -0.2275374040 | 0.000221877 |
| *TM7SF2* | -0.2275164652 | 0.000222182 |
| *GK* | 0.227514154443241 | 0.000222216 |
| *ARID5B* | -0.2274893905 | 0.000222577 |
| *PID1* | -0.2274734792 | 0.000222809 |
| *C1orf187* | 0.227437920431424 | 0.000223329 |
| *SLC38A9* | 0.227383331888836 | 0.000224129 |
| *POM121* | 0.227361936555252 | 0.000224444 |
| *CRYL1* | -0.2273437853 | 0.000224711 |
| *PAIP1* | 0.227284299620133 | 0.000225588 |
| *PSMA3* | 0.227243888242902 | 0.000226186 |
| *TNFRSF14* | -0.2271778273 | 0.000227166 |
| *TBX3* | 0.227112465574783 | 0.00022814 |
| *SLC8A1* | -0.2270864160 | 0.000228529 |
| *CPOX* | 0.227061851210425 | 0.000228897 |
| *C20orf203* | -0.2270468111 | 0.000229122 |
| *NAA25* | 0.226831243481834 | 0.000232375 |
| *CUL2* | 0.226738451268875 | 0.000233789 |
| *DNAH8* | 0.226685024885527 | 0.000234606 |
| *PABPC1L* | 0.226583389901582 | 0.000236168 |
| *KCNMA1* | -0.2265566139 | 0.000236582 |
| *TMEM218* | -0.2265351910 | 0.000236913 |
| *C1orf175* | -0.2264923282 | 0.000237576 |
| *NIPSNAP3B* | -0.2264635540 | 0.000238023 |
| *SPSB2* | -0.2264122105 | 0.000238822 |
| *SCNN1B* | -0.2263534257 | 0.000239739 |
| *RAD23B* | 0.226298034025238 | 0.000240607 |
| *FAM18A* | -0.2262926473 | 0.000240691 |
| *FBXL2* | -0.2262212047 | 0.000241815 |
| *BAT2* | 0.226180285924543 | 0.000242461 |
| *CBS* | 0.226129840742842 | 0.000243259 |
| *FRMPD4* | 0.226069825655763 | 0.000244212 |
| *PPM1K* | -0.2260587788 | 0.000244388 |
| *DMPK* | -0.2260486386 | 0.00024455 |
| *NOC2L* | 0.226044579554666 | 0.000244614 |
| *SVIL* | -0.2260200548 | 0.000245006 |
| *PRDM15* | 0.226012501297035 | 0.000245126 |
| *AKR1C3* | -0.2259586376 | 0.000245987 |
| *CEP68* | -0.2258613649 | 0.00024755 |
| *NKX2-4* | 0.225859353137845 | 0.000247582 |
| *TOP2B* | 0.225798816876062 | 0.00024856 |
| *LOC152225* | 0.225779696595675 | 0.000248869 |
| *GAMT* | -0.2257555026 | 0.000249261 |
| *RPL36AL* | -0.2257473825 | 0.000249393 |
| *GPN2* | 0.225724975861054 | 0.000249757 |
| *TTC4* | 0.225672954649617 | 0.000250603 |
| *COPA* | 0.225669957971539 | 0.000250652 |
| *SIGLEC15* | 0.22558802676534 | 0.000251991 |
| *GAGE4* | 0.225519374792955 | 0.000253118 |
| *SEC61A2* | 0.225494126370136 | 0.000253533 |
| *INHBC* | 0.225464608382656 | 0.00025402 |
| *SOLH* | 0.225464320541269 | 0.000254025 |
| *RELA* | -0.2253600964 | 0.00025575 |
| *INE1* | 0.225345083836804 | 0.000256 |
| *DND1* | 0.225270319040902 | 0.000257246 |
| *IL31RA* | 0.225180290649617 | 0.000258753 |
| *C19orf70* | -0.2251503983 | 0.000259255 |
| *CA2* | 0.225118202391851 | 0.000259798 |
| *CWF19L2* | -0.2250689852 | 0.000260628 |
| *ENOX1* | 0.225031252945196 | 0.000261267 |
| *SS18L1* | 0.225025073429652 | 0.000261372 |
| *C14orf135* | 0.224995419098875 | 0.000261875 |
| *SLC39A13* | -0.2249657105 | 0.00026238 |
| *ABHD14A* | -0.2249346623 | 0.000262908 |
| *MAGEB1* | 0.224882947525283 | 0.000263791 |
| *DDX21* | 0.224855534216206 | 0.00026426 |
| *FLJ30679* | 0.224835141844646 | 0.000264609 |
| *LOC100271831* | -0.2248289252 | 0.000264716 |
| *HYLS1* | 0.224713658751336 | 0.0002667 |
| *CKM* | 0.224705800643205 | 0.000266835 |
| *ILDR1* | 0.224687406657577 | 0.000267153 |
| *USP24* | 0.224658177604174 | 0.00026766 |
| *ALX1* | 0.224606690279815 | 0.000268553 |
| *ZNF347* | 0.224537389193634 | 0.00026976 |
| *CCNDBP1* | -0.2245343413 | 0.000269813 |
| *CACNA2D3* | -0.2244898336 | 0.000270592 |
| *MRPL45* | -0.2244723192 | 0.000270898 |
| *FAM57A* | 0.224443840648274 | 0.000271398 |
| *IRAK1* | 0.224440776626708 | 0.000271452 |
| *LRGUK* | 0.224383302088658 | 0.000272462 |
| *SLC16A13* | 0.224362394763164 | 0.000272831 |
| *PPM1G* | 0.224291742217537 | 0.00027408 |
| *GTPBP2* | 0.224165758596257 | 0.00027632 |
| *GADD45G* | -0.2241605077 | 0.000276414 |
| *AMAC1L3* | 0.224138023861918 | 0.000276816 |
| *CECR2* | 0.224089670100583 | 0.000277682 |
| *NPHP1* | -0.2240751343 | 0.000277943 |
| *CLDN5* | -0.2240411305 | 0.000278553 |
| *PL-5283* | 0.224005769751036 | 0.00027919 |
| *LOC643677* | 0.223998008142897 | 0.00027933 |
| *GFI1B* | -0.2239596147 | 0.000280023 |
| *NOL3* | -0.2239411751 | 0.000280357 |
| *MTMR11* | -0.2238924908 | 0.000281239 |
| *CLEC10A* | -0.2238883327 | 0.000281314 |
| *PRMT3* | 0.223887380833289 | 0.000281332 |
| *MRGPRD* | -0.2238664785 | 0.000281711 |
| *PRRC1* | 0.223853200134214 | 0.000281953 |
| *WNT7B* | 0.223730096876471 | 0.0002842 |
| *RNF168* | 0.223723601824043 | 0.000284319 |
| *CCDC115* | -0.2237011416 | 0.000284731 |
| *COPG* | 0.223693933589476 | 0.000284863 |
| *HAPLN1* | 0.223675970556132 | 0.000285194 |
| *TLE2* | -0.2236749446 | 0.000285212 |
| *SCD* | 0.223663018189382 | 0.000285432 |
| *AMACR* | 0.223653058712346 | 0.000285615 |
| *SAR1B* | 0.22345396405271 | 0.000289302 |
| *DFFB* | 0.223437838770819 | 0.000289603 |
| *P2RY13* | -0.2234371219 | 0.000289616 |
| *ZNF503* | -0.2234171919 | 0.000289988 |
| *HPGDS* | -0.2233855077 | 0.00029058 |
| *DCAF7* | 0.223322762183324 | 0.000291756 |
| *ARID3A* | 0.223314814268863 | 0.000291905 |
| *HDC* | -0.2232996450 | 0.000292191 |
| *NKX3-1* | 0.223264241383997 | 0.000292857 |
| *UBASH3B* | 0.223205308745006 | 0.000293969 |
| *SERINC2* | 0.223116773874144 | 0.000295648 |
| *ZSWIM6* | 0.22308405609913 | 0.000296271 |
| *TCEA2* | -0.2230825668 | 0.000296299 |
| *FKBP8* | -0.2230764355 | 0.000296416 |
| *MAGEC2* | 0.223061815963201 | 0.000296695 |
| *STK31* | 0.222925100305484 | 0.000299313 |
| *FAM190B* | -0.2228956557 | 0.00029988 |
| *SLC4A8* | 0.222886508479302 | 0.000300056 |
| *TSPYL2* | -0.2228663078 | 0.000300446 |
| *STX10* | 0.222852715409217 | 0.000300708 |
| *PDK4* | -0.2228112037 | 0.000301511 |
| *TMEM145* | 0.222748594363629 | 0.000302725 |
| *STAMBPL1* | 0.222702547834067 | 0.000303621 |
| *RPS3A* | -0.2226987310 | 0.000303696 |
| *RPL3* | -0.2226845321 | 0.000303973 |
| *SLC22A17* | -0.2226801014 | 0.000304059 |
| *PLCXD3* | -0.2226109328 | 0.000305412 |
| *MALL* | -0.2225931998 | 0.000305759 |
| *PECAM1* | -0.2225851872 | 0.000305916 |
| *LOC645323* | 0.222551684708142 | 0.000306575 |
| *ATP2C1* | 0.222550357005163 | 0.000306601 |
| *MTERFD1* | 0.222459679949656 | 0.000308389 |
| *NICN1* | -0.2224562668 | 0.000308456 |
| *FBRS* | -0.2224172389 | 0.000309229 |
| *SLC22A15* | 0.222404840581654 | 0.000309475 |
| *C1orf123* | -0.2223955053 | 0.00030966 |
| *HLCS* | 0.222342994065044 | 0.000310704 |
| *XAGE1D* | 0.222328216414232 | 0.000310998 |
| *NAALADL2* | -0.2223255043 | 0.000311052 |
| *RAB24* | -0.2223163550 | 0.000311235 |
| *FAM195A* | -0.2222828700 | 0.000311903 |
| *TPPP* | -0.2222382240 | 0.000312797 |
| *NTN5* | -0.2222364938 | 0.000312831 |
| *STARD5* | -0.2221564703 | 0.000314439 |
| *KCNS2* | -0.2220686660 | 0.000316211 |
| *C14orf169* | 0.222060324771527 | 0.00031638 |
| *TEX9* | 0.221992221941164 | 0.000317762 |
| *LASS2* | 0.221957271881368 | 0.000318473 |
| *ITPKC* | -0.2219486468 | 0.000318649 |
| *GTF3C4* | 0.221919309488406 | 0.000319247 |
| *DNM1* | 0.221833961826211 | 0.000320994 |
| *CACNB2* | -0.2218224842 | 0.00032123 |
| *C15orf50* | 0.221820496215189 | 0.000321271 |
| *ASNSD1* | -0.2218092287 | 0.000321502 |
| *PLIN2* | -0.2217683392 | 0.000322344 |
| *PSIMCT-1* | 0.221749051590939 | 0.000322742 |
| *RTN2* | -0.2217009355 | 0.000323735 |
| *GCM1* | 0.221661854825967 | 0.000324545 |
| *MYBBP1A* | 0.221592125664428 | 0.000325994 |
| *ARMC1* | 0.221550736682749 | 0.000326856 |
| *DHX34* | 0.221549335572832 | 0.000326886 |
| *C20orf200* | -0.2214870749 | 0.000328188 |
| *ATP6V1C2* | 0.221471332773886 | 0.000328518 |
| *PAQR3* | 0.221446015443699 | 0.000329049 |
| *TP63* | 0.221442491816848 | 0.000329123 |
| *ROBO4* | -0.2214017455 | 0.00032998 |
| *TMEM30B* | -0.2213453163 | 0.00033117 |
| *FAM189A2* | -0.2213341300 | 0.000331407 |
| *TSSC4* | -0.2213314077 | 0.000331464 |
| *N4BP2L1* | -0.2213303624 | 0.000331486 |
| *HADHB* | -0.2213232407 | 0.000331637 |
| *SGK2* | -0.2212989747 | 0.000332151 |
| *PTGIR* | -0.2212963732 | 0.000332206 |
| *MORC4* | 0.221274868169954 | 0.000332662 |
| *IPO4* | 0.221271067818762 | 0.000332742 |
| *BAG4* | 0.221183916777489 | 0.000334597 |
| *NCRNA00116* | -0.2211756593 | 0.000334773 |
| *ARFGAP3* | 0.221155752773666 | 0.000335198 |
| *PSME4* | 0.22113724688096 | 0.000335594 |
| *CHRDL2* | -0.2210804708 | 0.00033681 |
| *ADAMTSL4* | -0.2210745942 | 0.000336936 |
| *MAGEB2* | 0.221043629886093 | 0.000337602 |
| *RTN1* | -0.2210139157 | 0.000338241 |
| *NLN* | 0.220986472604492 | 0.000338833 |
| *USP6* | 0.220961541608413 | 0.000339372 |
| *MSN* | 0.220929417520416 | 0.000340067 |
| *PSMC2* | 0.220900301727049 | 0.000340698 |
| *SP2* | 0.220897683755264 | 0.000340755 |
| *MYCBP* | 0.220870722250102 | 0.00034134 |
| *ATP8B4* | -0.2208695348 | 0.000341366 |
| *SIK3* | -0.2207506761 | 0.000343958 |
| *BAZ2B* | -0.2206570540 | 0.000346013 |
| *BACH1* | 0.220645980880637 | 0.000346257 |
| *ODZ3* | 0.220591690019557 | 0.000347454 |
| *FAM24B* | 0.220577979989286 | 0.000347757 |
| *GYPC* | -0.2205728351 | 0.000347871 |
| *DPY19L1* | 0.22056760390433 | 0.000347987 |
| *TPCN2* | -0.2205439258 | 0.000348511 |
| *SPEN* | 0.220543734305832 | 0.000348515 |
| *XRN2* | 0.220517803494025 | 0.00034909 |
| *SEPP1* | -0.2205046909 | 0.000349381 |
| *CARD14* | 0.220486817946832 | 0.000349778 |
| *TNPO1* | 0.220480037404361 | 0.000349929 |
| *SKP1* | -0.2203762329 | 0.000352245 |
| *C17orf68* | -0.2203679529 | 0.00035243 |
| *DPP8* | 0.22034432633659 | 0.000352959 |
| *ZNF33B* | -0.2202533900 | 0.000355003 |
| *GIMAP1* | -0.2202316621 | 0.000355493 |
| *C11orf71* | -0.2201962484 | 0.000356293 |
| *CYCS* | 0.2201920540418 | 0.000356388 |
| *DIO3OS* | -0.2201755853 | 0.000356761 |
| *TMEM209* | 0.220153816111765 | 0.000357254 |
| *HOPX* | -0.2201466433 | 0.000357417 |
| *LYPLAL1* | -0.2201432620 | 0.000357494 |
| *GXYLT1* | 0.220115350471812 | 0.000358127 |
| *MYST1* | -0.2200915779 | 0.000358668 |
| *S100PBP* | 0.220077531344559 | 0.000358988 |
| *LRP11* | 0.220023334077603 | 0.000360224 |
| *PPCS* | -0.2200098003 | 0.000360533 |
| *C17orf73* | -0.2199461589 | 0.000361991 |
| *YES1* | 0.219943989718807 | 0.000362041 |
| *DHRS7* | -0.2198698171 | 0.000363747 |
| *GIMAP8* | -0.2198290851 | 0.000364687 |
| *RBM25* | 0.21978015023066 | 0.00036582 |
| *FAM167B* | -0.2197697868 | 0.00036606 |
| *HEMK1* | -0.2196601440 | 0.000368611 |
| *TPR* | 0.219602678856119 | 0.000369955 |
| *PIK3C2B* | -0.2195224124 | 0.000371839 |
| *ANKRD26* | 0.219516127700577 | 0.000371987 |
| *GMDS* | 0.219508008790935 | 0.000372178 |
| *SLC25A5* | 0.219507552234257 | 0.000372189 |
| *CENPW* | 0.219480072163283 | 0.000372836 |
| *STAG3* | 0.219467445690355 | 0.000373134 |
| *PAGE1* | 0.219443118347184 | 0.000373709 |
| *IL11* | 0.219433968653116 | 0.000373926 |
| *SLC10A4* | 0.219431854305938 | 0.000373976 |
| *LASP1* | 0.21939087161501 | 0.000374946 |
| *SNX4* | 0.219381737141635 | 0.000375163 |
| *FDXR* | -0.2193768848 | 0.000375278 |
| *RBBP7* | 0.219364287944779 | 0.000375577 |
| *MEMO1* | 0.219338422966469 | 0.000376192 |
| *ADAMTS4* | 0.219335277235293 | 0.000376267 |
| *HIST1H2AG* | 0.219328159794668 | 0.000376436 |
| *MSL3* | 0.219312646348986 | 0.000376805 |
| *ARL8A* | -0.2192975781 | 0.000377165 |
| *ABCC6P2* | -0.2192741681 | 0.000377723 |
| *CHID1* | -0.2192709108 | 0.000377801 |
| *FNBP1* | -0.2192629507 | 0.000377991 |
| *NUP43* | 0.219252477035233 | 0.000378241 |
| *GTF2A1* | 0.219246582115641 | 0.000378382 |
| *HEPH* | -0.2192399204 | 0.000378542 |
| *RNPS1* | 0.219212691272764 | 0.000379194 |
| *AK2* | 0.219169891883669 | 0.000380221 |
| *CPT1A* | -0.2191502764 | 0.000380692 |
| *NISCH* | -0.2191090843 | 0.000381684 |
| *ARMCX1* | -0.2190920195 | 0.000382096 |
| *INSRR* | 0.219078296944956 | 0.000382427 |
| *EIF3C* | 0.219060825485853 | 0.000382849 |
| *PPP1R12B* | -0.2190485015 | 0.000383147 |
| *CD70* | 0.219023866846513 | 0.000383744 |
| *REEP5* | -0.2189921482 | 0.000384513 |
| *CHMP4A* | -0.2189723802 | 0.000384993 |
| *RDH14* | -0.2189551935 | 0.000385411 |
| *GPR112* | -0.2189325780 | 0.000385962 |
| *CNOT3* | 0.218912366304246 | 0.000386454 |
| *DRD4* | -0.2189053293 | 0.000386626 |
| *MAPRE1* | 0.218862853774284 | 0.000387664 |
| *PDIA6* | 0.218806684156719 | 0.00038904 |
| *KDM1B* | 0.218781980176487 | 0.000389646 |
| *ESRP1* | 0.218720820016385 | 0.000391152 |
| *ZMYND11* | -0.2186793589 | 0.000392176 |
| *ANKMY1* | -0.2186655173 | 0.000392518 |
| *SMPX* | 0.218565845219596 | 0.000394992 |
| *SLC2A11* | -0.2185147772 | 0.000396265 |
| *SLC30A5* | 0.218500769853466 | 0.000396615 |
| *TEX264* | -0.2184897250 | 0.000396891 |
| *CBFA2T2* | 0.218439598933389 | 0.000398146 |
| *SLAMF9* | 0.218395246590531 | 0.000399259 |
| *TCTN1* | -0.2183824286 | 0.000399582 |
| *ZNF430* | 0.218382173489465 | 0.000399588 |
| *OXSR1* | 0.218374518472789 | 0.000399781 |
| *SOX13* | -0.2183564483 | 0.000400236 |
| *UBOX5* | -0.2183543133 | 0.00040029 |
| *PYGM* | -0.2183235297 | 0.000401066 |
| *DDX3X* | 0.218267111991653 | 0.000402493 |
| *ZNF281* | 0.218240636283311 | 0.000403164 |
| *PRRT3* | -0.2182067117 | 0.000404025 |
| *SBDS* | -0.2182033375 | 0.000404111 |
| *GAGE12D* | 0.218162200115696 | 0.000405158 |
| *GLRX5* | 0.21808458519021 | 0.00040714 |
| *ARHGEF3* | -0.2180694180 | 0.000407529 |
| *STARD10* | -0.2180366132 | 0.00040837 |
| *RPL19P12* | -0.2179955505 | 0.000409425 |
| *SEL1L2* | -0.2179943581 | 0.000409456 |
| *PANK4* | 0.217983257021913 | 0.000409742 |
| *FRY* | -0.2179519332 | 0.000410549 |
| *C12orf32* | 0.217940285138555 | 0.00041085 |
| *C9orf68* | -0.2179022038 | 0.000411834 |
| *INHBE* | 0.217843121210316 | 0.000413365 |
| *PARVA* | -0.2178269825 | 0.000413785 |
| *HIPK2* | 0.217816816179437 | 0.000414049 |
| *LOC222699* | 0.217767359491257 | 0.000415337 |
| *APOB* | -0.2177554156 | 0.000415648 |
| *SLC9A9* | -0.2177512607 | 0.000415757 |
| *SFRS9* | 0.217727745642964 | 0.000416371 |
| *GRIN2A* | -0.2177243621 | 0.000416459 |
| *GEFT* | -0.2176933895 | 0.00041727 |
| *LOC645332* | -0.2176823167 | 0.00041756 |
| *RPS13* | -0.2176594727 | 0.000418159 |
| *FBLIM1* | -0.2176490675 | 0.000418432 |
| *RPL27A* | -0.2176147655 | 0.000419334 |
| *SEPT11* | 0.217573942617541 | 0.000420409 |
| *SLC6A7* | 0.217529464634671 | 0.000421584 |
| *PEBP4* | -0.2174776143 | 0.000422957 |
| *FSIP1* | 0.217463141412262 | 0.000423341 |
| *SRM* | 0.217439168939131 | 0.000423977 |
| *ARHGEF4* | -0.2174315319 | 0.000424181 |
| *LOC727896* | 0.217402387153824 | 0.000424956 |
| *TBRG1* | -0.2174017810 | 0.000424972 |
| *CT45A6* | 0.217385440094262 | 0.000425408 |
| *SLC5A3* | 0.217368637451388 | 0.000425856 |
| *ALOXE3* | 0.217361374304203 | 0.00042605 |
| *NFKBID* | 0.217323401915475 | 0.000427065 |
| *MGMT* | -0.2172993495 | 0.000427709 |
| *RPIA* | 0.217249036851957 | 0.000429059 |
| *KCNK6* | -0.2172360330 | 0.000429409 |
| *PLA2R1* | -0.2172300031 | 0.000429571 |
| *ZNF771* | -0.2171791434 | 0.000430942 |
| *ACLY* | 0.21716167838386 | 0.000431413 |
| *SRR* | 0.217158500269901 | 0.000431499 |
| *OR1F1* | 0.217139830256676 | 0.000432004 |
| *YBX1* | 0.217034171765559 | 0.00043487 |
| *SLC32A1* | 0.21696881040728 | 0.000436653 |
| *INSR* | -0.2169675733 | 0.000436686 |
| *CARM1* | 0.216963733266477 | 0.000436791 |
| *LOC647946* | 0.216856891796047 | 0.00043972 |
| *ADNP* | 0.216856404839777 | 0.000439733 |
| *PHF13* | 0.216736570758633 | 0.00044304 |
| *GATA6* | -0.2167152989 | 0.000443629 |
| *DDN* | 0.216683515712292 | 0.000444511 |
| *ABLIM2* | -0.2166643864 | 0.000445043 |
| *C1orf52* | 0.216625651899103 | 0.000446121 |
| *SNIP1* | 0.216421994980941 | 0.00045183 |
| *NBAS* | -0.2164104760 | 0.000452155 |
| *TIAM1* | 0.216380536543139 | 0.000453 |
| *ARF6* | 0.216353503452384 | 0.000453765 |
| *CISD3* | -0.2163241974 | 0.000454595 |
| *ASPRV1* | -0.2163067307 | 0.000455091 |
| *LARP1* | 0.216303769752129 | 0.000455175 |
| *VAMP5* | -0.2163005766 | 0.000455266 |
| *CLCN5* | 0.216272294840187 | 0.000456069 |
| *SORCS3* | -0.2162617161 | 0.00045637 |
| *CASQ1* | -0.2162555951 | 0.000456545 |
| *THOP1* | 0.216253164621596 | 0.000456614 |
| *ZFP64* | 0.216233216418262 | 0.000457182 |
| *ARSG* | -0.2162161219 | 0.00045767 |
| *MYADM* | -0.2161960479 | 0.000458243 |
| *CPSF2* | 0.216190014053879 | 0.000458415 |
| *NXPH4* | 0.216126320174938 | 0.000460239 |
| *NANS* | 0.216094818813814 | 0.000461143 |
| *ASAH2B* | 0.216060222849078 | 0.000462138 |
| *C9orf30* | 0.215969808026102 | 0.000464749 |
| *KLF8* | -0.2159315056 | 0.000465858 |
| *BCL10* | 0.215865023732159 | 0.000467791 |
| *RIF1* | 0.21583550603823 | 0.000468651 |
| *C20orf94* | 0.215825745685639 | 0.000468936 |
| *RUNX1* | 0.215810600879661 | 0.000469378 |
| *ST8SIA2* | 0.215802989422893 | 0.0004696 |
| *PRDM6* | -0.2157914842 | 0.000469937 |
| *MED7* | -0.2157630936 | 0.000470768 |
| *NHLRC2* | 0.215716593420833 | 0.000472132 |
| *MRPL42* | 0.215691037740909 | 0.000472883 |
| *SDK1* | -0.2156683772 | 0.00047355 |
| *ZBTB33* | 0.215638446738143 | 0.000474432 |
| *SLC45A1* | -0.2156160223 | 0.000475094 |
| *TRAPPC6A* | -0.2156067914 | 0.000475367 |
| *ATN1* | -0.2155936332 | 0.000475756 |
| *GAGE12J* | 0.215554873675018 | 0.000476904 |
| *ZNF828* | 0.21554427824257 | 0.000477218 |
| *P2RX2* | -0.2155404085 | 0.000477333 |
| *CHST14* | 0.2154929704 | 0.000478742 |
| *SEC23IP* | 0.215477030155608 | 0.000479217 |
| *JMJD4* | -0.2154439630 | 0.000480202 |
| *SFTPD* | -0.2154388964 | 0.000480354 |
| *C4orf12* | -0.2154386883 | 0.00048036 |
| *SHMT2* | 0.2154344909787 | 0.000480485 |
| *RFPL2* | 0.215420312741632 | 0.000480909 |
| *TULP2* | -0.2153839366 | 0.000481996 |
| *KCNE1L* | 0.215381712460875 | 0.000482063 |
| *SLC25A40* | 0.215360029382174 | 0.000482713 |
| *NIPBL* | 0.215356678639303 | 0.000482813 |
| *ADAT1* | 0.215316136072054 | 0.00048403 |
| *ATXN7L2* | 0.215313279579206 | 0.000484116 |
| *TNNI3K* | -0.2152973415 | 0.000484596 |
| *CD1E* | -0.2152422294 | 0.000486256 |
| *GPX3* | -0.2152055875 | 0.000487364 |
| *ERCC8* | 0.215171747936493 | 0.000488388 |
| *VPS24* | -0.2151553339 | 0.000488886 |
| *LEFTY2* | -0.2151447958 | 0.000489206 |
| *SCT* | -0.2150773621 | 0.000491257 |
| *VPS18* | -0.2150565677 | 0.000491891 |
| *POLD2* | 0.215033910029687 | 0.000492582 |
| *NCRNA00204B* | -0.2150294003 | 0.00049272 |
| *GMCL1* | 0.215022290712982 | 0.000492938 |
| *BAD* | -0.2150194792 | 0.000493023 |
| *RNF6* | 0.214995004235232 | 0.000493772 |
| *CXCL5* | 0.214971946257775 | 0.000494479 |
| *PIAS4* | 0.214969371732965 | 0.000494558 |
| *C10orf111* | 0.214941024700924 | 0.000495428 |
| *GPBAR1* | -0.2149250581 | 0.000495918 |
| *ARHGEF1* | 0.214888795330103 | 0.000497034 |
| *CRADD* | -0.2148312247 | 0.00049881 |
| *LRRFIP1* | -0.2148134627 | 0.00049936 |
| *ZNF205* | -0.2148086414 | 0.000499509 |
| *PPP2R3B* | 0.214793457300642 | 0.000499979 |
| *C1QBP* | 0.214761923499438 | 0.000500957 |
| *NKRF* | 0.214721976528518 | 0.000502198 |
| *SSC5D* | -0.2146963710 | 0.000502994 |
| *DIS3L2* | -0.2146624811 | 0.000504051 |
| *CHCHD5* | -0.2146537065 | 0.000504325 |
| *EPB41L1* | -0.2146531061 | 0.000504344 |
| *TPCN1* | -0.2145483629 | 0.000507624 |
| *GAGE13* | 0.214534018668305 | 0.000508075 |
| *IPO9* | 0.214512469508099 | 0.000508753 |
| *GLCE* | 0.21448698961641 | 0.000509555 |
| *SLC30A6* | 0.214460384014879 | 0.000510395 |
| *DDX55* | 0.214458208828865 | 0.000510463 |
| *TTLL12* | 0.214427314584927 | 0.00051144 |
| *EIF3F* | -0.2144170720 | 0.000511764 |
| *RNF135* | -0.2144067103 | 0.000512092 |
| *CNNM4* | 0.214404388797511 | 0.000512165 |
| *RNF130* | -0.2143918904 | 0.000512561 |
| *DFNB59* | -0.2143820526 | 0.000512873 |
| *ACTA2* | -0.2143798377 | 0.000512944 |
| *TCHH* | 0.214371402876666 | 0.000513211 |
| *THAP4* | -0.2143196729 | 0.000514855 |
| *RPS28* | -0.2143097784 | 0.00051517 |
| *TLR9* | -0.2142828408 | 0.000516029 |
| *SP4* | 0.214266162502093 | 0.000516561 |
| *CAND1* | 0.214256896437211 | 0.000516857 |
| *DLX4* | 0.214232361652078 | 0.000517641 |
| *NOG* | 0.214185265858378 | 0.000519149 |
| *RPS27A* | -0.2141482052 | 0.000520339 |
| *ANXA11* | -0.2141117013 | 0.000521514 |
| *ABHD2* | 0.214106913477265 | 0.000521668 |
| *SIX1* | 0.214100859091277 | 0.000521863 |
| *LRRIQ3* | 0.213994166647972 | 0.000525312 |
| *C14orf49* | 0.21398605718849 | 0.000525575 |
| *PDC* | 0.213981581094254 | 0.00052572 |
| *ASB2* | -0.2139765081 | 0.000525885 |
| *POU6F1* | -0.2139713170 | 0.000526054 |
| *NHLH2* | 0.213970075790761 | 0.000526094 |
| *SNHG5* | -0.2139601817 | 0.000526415 |
| *4-Mar* | 0.213946788911363 | 0.00052685 |
| *TRIO* | 0.213920579164538 | 0.000527703 |
| *KCNE1* | 0.213908370359327 | 0.000528101 |
| *COX7B2* | 0.213822587933637 | 0.000530903 |
| *ZNF575* | -0.2137716753 | 0.000532573 |
| *SPANXE* | 0.213764666806012 | 0.000532803 |
| *DNAJC16* | 0.21376117349262 | 0.000532918 |
| *EIF4B* | -0.2137499796 | 0.000533286 |
| *ZNF699* | 0.213743655451075 | 0.000533494 |
| *GPR89C* | 0.213737377252085 | 0.0005337 |
| *C16orf48* | -0.2137208390 | 0.000534245 |
| *DBI* | 0.213720331695283 | 0.000534261 |
| *C3orf18* | -0.2137112460 | 0.000534561 |
| *ELOVL6* | 0.21369703691912 | 0.000535029 |
| *AQP8* | -0.2136744948 | 0.000535773 |
| *ZBTB7C* | -0.2136177578 | 0.00053765 |
| *C18orf1* | -0.2136010478 | 0.000538203 |
| *KIAA1244* | 0.213590961548815 | 0.000538538 |
| *C8orf73* | -0.2135638439 | 0.000539439 |
| *AMIGO3* | 0.213548641690414 | 0.000539944 |
| *CCDC61* | -0.2135367650 | 0.000540339 |
| *DENR* | 0.213483033285924 | 0.00054213 |
| *SOD2* | -0.2134708826 | 0.000542536 |
| *LRIG2* | 0.21344523925273 | 0.000543393 |
| *GCSH* | 0.213444810532994 | 0.000543408 |
| *TSEN15* | 0.213432783052223 | 0.00054381 |
| *PLK1S1* | -0.2134274997 | 0.000543987 |
| *AGPAT1* | -0.2134230093 | 0.000544138 |
| *ZBTB7B* | -0.2134154095 | 0.000544392 |
| *PBX4* | 0.213399796066162 | 0.000544916 |
| *RPS14* | -0.2133181564 | 0.000547661 |
| *LTA4H* | -0.2132696857 | 0.000549297 |
| *GRIK5* | -0.2132537962 | 0.000549834 |
| *RWDD2B* | -0.2131819193 | 0.00055227 |
| *NMU* | 0.213161447282667 | 0.000552966 |
| *TTLL3* | -0.2131447192 | 0.000553535 |
| *ATP13A1* | 0.213097271767526 | 0.000555152 |
| *LOC100240734* | -0.2130506133 | 0.000556746 |
| *SPTY2D1* | 0.213035123326823 | 0.000557277 |
| *USP32* | 0.21302120991431 | 0.000557753 |
| *CALU* | 0.212993745476485 | 0.000558696 |
| *FAM165B* | -0.2129670190 | 0.000559614 |
| *ZNF569* | 0.212956288538738 | 0.000559983 |
| *NLRX1* | -0.2128901802 | 0.000562261 |
| *RRP8* | -0.2128867048 | 0.000562381 |
| *RAB36* | -0.2128840509 | 0.000562473 |
| *LMAN1* | 0.212865676505657 | 0.000563108 |
| *DENND4C* | -0.2128353739 | 0.000564157 |
| *ANP32B* | 0.212773935391668 | 0.000566289 |
| *MGC27382* | 0.212753450280962 | 0.000567001 |
| *SOX17* | -0.2127325176 | 0.00056773 |
| *C19orf34* | 0.212712517846514 | 0.000568428 |
| *MED6* | 0.212704440012947 | 0.000568709 |
| *PTGIS* | -0.2126809730 | 0.000569529 |
| *THNSL2* | -0.2126736727 | 0.000569784 |
| *PKDREJ* | 0.212660510433704 | 0.000570244 |
| *ZC3H12B* | -0.2125920722 | 0.000572643 |
| *TMEM151B* | 0.212578081571496 | 0.000573135 |
| *AIMP2* | 0.212557760780397 | 0.00057385 |
| *HOMER1* | 0.212548663034453 | 0.00057417 |
| *NNT* | 0.212534755440583 | 0.00057466 |
| *UBA7* | -0.2124851622 | 0.00057641 |
| *GRINA* | -0.2124326156 | 0.000578269 |
| *LOC388789* | -0.2124299786 | 0.000578363 |
| *ANKFN1* | 0.21239607440704 | 0.000579566 |
| *THUMPD3* | 0.212379446057879 | 0.000580157 |
| *TRPM6* | -0.2123631766 | 0.000580735 |
| *MZF1* | -0.2123506200 | 0.000581182 |
| *RILPL2* | -0.2123503482 | 0.000581192 |
| *NACC2* | -0.2123023663 | 0.000582903 |
| *C10orf72* | -0.2123015738 | 0.000582931 |
| *CEP170* | 0.212270099789571 | 0.000584056 |
| *ATP5D* | -0.2122452121 | 0.000584947 |
| *LOC728264* | -0.2122384561 | 0.000585189 |
| *PRDM16* | -0.2122347738 | 0.000585321 |
| *PGM5P2* | -0.2122119089 | 0.000586141 |
| *OPN3* | 0.212208821155721 | 0.000586252 |
| *CCDC80* | -0.2121141998 | 0.000589657 |
| *BSPRY* | -0.2120920634 | 0.000590456 |
| *C17orf51* | 0.212067147959433 | 0.000591357 |
| *SCN5A* | 0.212054432385121 | 0.000591818 |
| *KY* | -0.2120267772 | 0.00059282 |
| *ULK3* | 0.212023260042383 | 0.000592947 |
| *WDR36* | 0.211926360056395 | 0.000596472 |
| *TAGLN2* | 0.211835240977751 | 0.000599804 |
| *GJA5* | -0.2118156067 | 0.000600524 |
| *HOXB9* | 0.211784533687496 | 0.000601665 |
| *C17orf75* | 0.211758857185416 | 0.00060261 |
| *CXorf48* | 0.211746139286084 | 0.000603079 |
| *KIF27* | 0.211713183440389 | 0.000604294 |
| *COPB2* | 0.211706688545742 | 0.000604534 |
| *TPSD1* | -0.2116963516 | 0.000604916 |
| *CYB5R3* | -0.2116327044 | 0.000607272 |
| *PRX* | -0.2115926559 | 0.000608759 |
| *ACSS2* | -0.2114507433 | 0.000614054 |
| *RAI1* | 0.211448901219944 | 0.000614123 |
| *WEE1* | 0.21141441706292 | 0.000615417 |
| *SH2B1* | -0.2113864286 | 0.000616468 |
| *CLEC4F* | -0.2113715284 | 0.000617029 |
| *CXorf57* | 0.211364951110312 | 0.000617276 |
| *ATP2A1* | 0.21130440727579 | 0.00061956 |
| *JUND* | -0.2112962446 | 0.000619868 |
| *NUDT9* | -0.2112845635 | 0.00062031 |
| *BDNFOS* | -0.2112756072 | 0.000620649 |
| *CSNK2A1P* | 0.211084985173598 | 0.0006279 |
| *NT5DC2* | 0.211048816820392 | 0.000629285 |
| *CCDC24* | -0.2110344172 | 0.000629837 |
| *ACTBL2* | 0.210969238275117 | 0.000632342 |
| *OR2B6* | 0.210889117258391 | 0.000635433 |
| *HPDL* | 0.210869800203402 | 0.000636181 |
| *MKRN2* | 0.210857774301489 | 0.000636646 |
| *BCL6* | -0.2108399344 | 0.000637338 |
| *APOBEC3A* | 0.210808041710321 | 0.000638576 |
| *ARID1A* | 0.210806171894753 | 0.000638648 |
| *POM121C* | 0.210804576799483 | 0.00063871 |
| *SNHG1* | 0.210785474167774 | 0.000639453 |
| *NAT6* | -0.2107738196 | 0.000639906 |
| *LHFP* | -0.2107640708 | 0.000640286 |
| *NOM1* | 0.210764067692265 | 0.000640286 |
| *LOC284900* | -0.2107625239 | 0.000640346 |
| *TEKT3* | -0.2107548643 | 0.000640645 |
| *FBXL8* | -0.2107144876 | 0.00064222 |
| *DENND4B* | 0.210675556972582 | 0.000643742 |
| *TCHP* | 0.210650122812854 | 0.000644738 |
| *KDM6A* | 0.21063801321853 | 0.000645213 |
| *KIAA1715* | 0.210630987690293 | 0.000645488 |
| *RARS* | 0.210603556052831 | 0.000646566 |
| *HES7* | 0.210578667649641 | 0.000647544 |
| *ZNF483* | -0.2105626298 | 0.000648176 |
| *HRNBP3* | -0.2105508945 | 0.000648638 |
| *C9orf103* | -0.2105374434 | 0.000649168 |
| *TUBGCP4* | 0.210534427798453 | 0.000649287 |
| *ZNF833* | 0.210476493794505 | 0.000651577 |
| *TAF9* | 0.210473120797887 | 0.00065171 |
| *PHKB* | -0.2104554158 | 0.000652411 |
| *MYCT1* | -0.2104470771 | 0.000652742 |
| *KLRG2* | 0.210437821860498 | 0.000653109 |
| *CCDC81* | -0.2104309132 | 0.000653383 |
| *TUBGCP5* | 0.210329260806519 | 0.000657428 |
| *CCDC76* | 0.21031032969904 | 0.000658184 |
| *CASKIN2* | -0.2103097193 | 0.000658208 |
| *QSOX2* | 0.210304699547791 | 0.000658409 |
| *GRK5* | -0.2102324473 | 0.000661302 |
| *NEDD4* | 0.210086648545351 | 0.000667176 |
| *CD302* | -0.2100774306 | 0.000667549 |
| *PDZRN3* | -0.2100743085 | 0.000667676 |
| *DCAF6* | -0.2100567064 | 0.000668389 |
| *FLJ25758* | 0.210056437222157 | 0.0006684 |
| *SMURF2* | 0.210047647962495 | 0.000668756 |
| *DUSP4* | 0.210042365360874 | 0.00066897 |
| *C2orf69* | 0.209918489004149 | 0.000674011 |
| *6-Mar* | 0.209827740393269 | 0.000677727 |
| *LHX8* | 0.209825107562991 | 0.000677835 |
| *SPSB3* | -0.2098113457 | 0.0006784 |
| *GPR17* | -0.2097964619 | 0.000679012 |
| *OBSL1* | -0.2097708842 | 0.000680064 |
| *TBCK* | -0.2097606803 | 0.000680484 |
| *TEF* | -0.2097292992 | 0.000681778 |
| *SAPS1* | 0.20972705190458 | 0.000681871 |
| *ZNF813* | 0.209637506390144 | 0.000685577 |
| *EEF1A1P9* | -0.2096006799 | 0.000687106 |
| *IGSF9* | 0.209595984951927 | 0.000687301 |
| *ARHGEF9* | -0.2095800266 | 0.000687965 |
| *DPP3* | 0.209574356032808 | 0.000688201 |
| *NBPF1* | 0.209504463756409 | 0.000691116 |
| *FAM21B* | -0.2094934122 | 0.000691578 |
| *RPL41* | -0.2094920435 | 0.000691636 |
| *C1orf159* | 0.20942347099577 | 0.000694509 |
| *KLHDC1* | -0.2094079383 | 0.000695161 |
| *BMP2K* | 0.209348696870572 | 0.000697655 |
| *RHBDL1* | -0.2093486436 | 0.000697657 |
| *RBM12* | 0.209345392988791 | 0.000697794 |
| *ARPC5L* | 0.209335964141139 | 0.000698192 |
| *IGBP1* | -0.2093160821 | 0.000699031 |
| *BCAM* | -0.2093101996 | 0.00069928 |
| *C20orf108* | -0.2092349471 | 0.000702466 |
| *MUC20* | -0.2092306072 | 0.00070265 |
| *AMICA1* | -0.2092149005 | 0.000703317 |
| *CLCN4* | 0.209180250976916 | 0.00070479 |
| *C12orf57* | -0.2091766465 | 0.000704943 |
| *TRIM42* | -0.2091610608 | 0.000705607 |
| *SPINT2* | -0.2091406899 | 0.000706475 |
| *FKBP15* | 0.209102974904403 | 0.000708086 |
| *TECR* | 0.209083314171404 | 0.000708926 |
| *TRIM13* | -0.2090728727 | 0.000709373 |
| *DECR2* | -0.2090699967 | 0.000709496 |
| *C1orf89* | -0.2090682402 | 0.000709572 |
| *HIRA* | 0.208941373252582 | 0.000715024 |
| *TMED8* | 0.208857173251503 | 0.000718664 |
| *ADCY2* | -0.2088020342 | 0.000721057 |
| *C18orf32* | -0.2087843274 | 0.000721827 |
| *C11orf54* | -0.2087679930 | 0.000722538 |
| *EMCN* | -0.2086925838 | 0.000725828 |
| *SNX19* | -0.2086799887 | 0.000726379 |
| *CKMT1A* | 0.208660353433601 | 0.000727239 |
| *UTP20* | 0.208656930926394 | 0.000727389 |
| *MED22* | -0.2086548622 | 0.00072748 |
| *SLC18A2* | -0.2086517438 | 0.000727616 |
| *FAM81A* | 0.20858591360588 | 0.000730507 |
| *MAPKSP1* | -0.2085571145 | 0.000731775 |
| *KIAA1731* | 0.208549442239375 | 0.000732113 |
| *PFDN2* | 0.208538180024912 | 0.000732609 |
| *CHMP7* | -0.2085166709 | 0.000733559 |
| *DHRS2* | 0.208497471538657 | 0.000734407 |
| *TACR3* | 0.208495811456099 | 0.00073448 |
| *C10orf110* | 0.208470009148808 | 0.000735622 |
| *LOC283867* | 0.208447011148891 | 0.000736641 |
| *BCAS3* | -0.2084198648 | 0.000737845 |
| *NCRNA00159* | -0.2083929280 | 0.000739042 |
| *MGAT2* | 0.208339778622704 | 0.000741409 |
| *FBXO36* | -0.2083293559 | 0.000741873 |
| *LDHA* | 0.208322696699869 | 0.000742171 |
| *GADD45B* | -0.2083122449 | 0.000742637 |
| *NUP62CL* | 0.208294474293428 | 0.000743431 |
| *MAP3K13* | 0.20827064445039 | 0.000744498 |
| *RAP2B* | 0.208233590153317 | 0.000746158 |
| *TTC1* | -0.2081262664 | 0.000750987 |
| *RAB3B* | 0.20812205467607 | 0.000751177 |
| *TIAM2* | 0.208117899619023 | 0.000751365 |
| *PRNP* | -0.2080313479 | 0.000755282 |
| *ITGA9* | -0.2080218824 | 0.000755711 |
| *METTL6* | 0.20801032852208 | 0.000756236 |
| *FAM66D* | -0.2078676645 | 0.000762741 |
| *HOXD4* | -0.2078625933 | 0.000762973 |
| *METT11D1* | 0.207858464790537 | 0.000763162 |
| *MPP6* | 0.207839647550574 | 0.000764025 |
| *SLC25A19* | 0.207793163797179 | 0.000766159 |
| *SLC1A5* | 0.207780687539854 | 0.000766732 |
| *RPL7L1* | 0.207750763125541 | 0.00076811 |
| *ISCA1* | -0.2077440545 | 0.000768419 |
| *FAM160B1* | -0.2077141962 | 0.000769796 |
| *CASQ2* | -0.2077075175 | 0.000770105 |
| *DAK* | -0.2076799814 | 0.000771378 |
| *BOK* | -0.2076563842 | 0.00077247 |
| *GABARAP* | -0.2076537177 | 0.000772593 |
| *ZNF295* | 0.207556407634092 | 0.000777113 |
| *PLCH1* | 0.207549647652129 | 0.000777428 |
| *LOC100133545* | -0.2073784456 | 0.000785443 |
| *ACE2* | -0.2073753941 | 0.000785586 |
| *CALD1* | -0.2073579784 | 0.000786406 |
| *NUPR1* | -0.2073336219 | 0.000787554 |
| *HADHA* | -0.2072985426 | 0.000789209 |
| *HSF2BP* | 0.207292739490021 | 0.000789483 |
| *FNDC8* | 0.207251020635758 | 0.000791457 |
| *TPTE2P1* | -0.2071504020 | 0.000796237 |
| *PFKM* | -0.2071100882 | 0.000798159 |
| *CRYBA2* | 0.207080311719614 | 0.000799582 |
| *TWF1* | 0.207073127581774 | 0.000799925 |
| *TPBG* | 0.20701257072442 | 0.000802827 |
| *OPTN* | -0.2070058173 | 0.000803151 |
| *COPB1* | 0.206988307375367 | 0.000803992 |
| *HSN2* | 0.206984773605007 | 0.000804162 |
| *RAMP2* | -0.2069665382 | 0.000805039 |
| *RC3H2* | 0.206957180753898 | 0.000805489 |
| *CDNF* | -0.2069552824 | 0.000805581 |
| *NOP58* | 0.206932735948086 | 0.000806667 |
| *QKI* | 0.206884139811683 | 0.000809012 |
| *PODN* | -0.2068146263 | 0.000812379 |
| *TMEM176B* | -0.2068086189 | 0.00081267 |
| *ZIC2* | 0.206691068391267 | 0.000818395 |
| *PGM2* | 0.206675642896934 | 0.000819148 |
| *TNKS1BP1* | -0.2066533999 | 0.000820237 |
| *SMCR7L* | 0.206630557328307 | 0.000821356 |
| *CA9* | 0.206616346788593 | 0.000822052 |
| *LDB3* | -0.2065827173 | 0.000823704 |
| *CASP7* | 0.206582032074326 | 0.000823737 |
| *LOC646999* | 0.206574227022783 | 0.000824121 |
| *WWC1* | 0.206506974725542 | 0.000827434 |
| *STK25* | -0.2065062311 | 0.00082747 |
| *WDR34* | 0.206499089671994 | 0.000827823 |
| *C9orf23* | -0.2062980319 | 0.000837804 |
| *PAGE2* | 0.206297414057914 | 0.000837835 |
| *CHORDC1* | 0.206260102150098 | 0.0008397 |
| *EEF1B2* | -0.2062578793 | 0.000839811 |
| *PQLC3* | -0.2062037634 | 0.000842522 |
| *TMEM90B* | -0.2061578378 | 0.00084483 |
| *SHQ1* | 0.20614871799819 | 0.000845289 |
| *WHAMML1* | -0.2061402066 | 0.000845717 |
| *NKX2-6* | 0.206120827553446 | 0.000846694 |
| *APLP1* | 0.20609774307276 | 0.000847858 |
| *CYP4X1* | -0.2060886138 | 0.000848319 |
| *PDE6B* | -0.2060748073 | 0.000849016 |
| *LOC100133331* | 0.206067693691023 | 0.000849376 |
| *MMP9* | 0.206012088046873 | 0.000852191 |
| *ZNF233* | -0.2059365013 | 0.000856032 |
| *UBE2I* | 0.205918218347526 | 0.000856964 |
| *PLOD2* | 0.205899267480366 | 0.00085793 |
| *VIPR2* | -0.2058840610 | 0.000858706 |
| *OSBPL5* | -0.2057983190 | 0.000863095 |
| *TCF20* | 0.205791174248187 | 0.000863462 |
| *PAK1* | 0.205763142749497 | 0.000864902 |
| *CAMKV* | 0.205732400552783 | 0.000866484 |
| *PLSCR3* | -0.2056930194 | 0.000868514 |
| *FAM48A* | 0.205657988855952 | 0.000870323 |
| *CASP3* | 0.205620784913839 | 0.000872249 |
| *INPP5J* | -0.2055890608 | 0.000873894 |
| *PAX9* | 0.205563450156804 | 0.000875224 |
| *FBXO44* | -0.2055525958 | 0.000875788 |
| *STARD4* | 0.205548447924708 | 0.000876004 |
| *RPRD1B* | 0.205503377186831 | 0.000878351 |
| *FAM129B* | 0.205486905983492 | 0.00087921 |
| *SLC5A6* | 0.205475190774154 | 0.000879822 |
| *GTPBP4* | 0.205474589113855 | 0.000879853 |
| *YEATS2* | 0.205447580397271 | 0.000881265 |
| *FER1L6* | 0.205365330101137 | 0.000885576 |
| *TMEM159* | -0.2053570005 | 0.000886014 |
| *ADRA2C* | -0.2053206518 | 0.000887927 |
| *GPER* | -0.2052901395 | 0.000889535 |
| *OCEL1* | -0.2052761470 | 0.000890273 |
| *LCMT2* | 0.205210293725821 | 0.000893756 |
| *LOC729678* | -0.2052057997 | 0.000893995 |
| *RARRES1* | -0.2052040928 | 0.000894085 |
| *KIAA0907* | 0.20517761914432 | 0.000895489 |
| *TMEM104* | 0.205176612296466 | 0.000895543 |
| *PRMT6* | 0.205157096062622 | 0.000896579 |
| *VIPR1* | -0.2051529879 | 0.000896798 |
| *TIMM50* | 0.205124100010192 | 0.000898334 |
| *C9orf43* | 0.205103794858301 | 0.000899416 |
| *FILIP1* | -0.2050360526 | 0.000903033 |
| *FAM3A* | -0.2050352158 | 0.000903077 |
| *SPAG16* | -0.2050296071 | 0.000903377 |
| *CCDC48* | -0.2050271573 | 0.000903509 |
| *RWDD1* | -0.2050245735 | 0.000903647 |
| *DLEU7* | 0.205015737758028 | 0.00090412 |
| *DHX37* | 0.204987233039718 | 0.000905648 |
| *RIOK1* | 0.204942608688566 | 0.000908044 |
| *HSD17B6* | -0.2049419460 | 0.00090808 |
| *CNOT1* | 0.204899088799684 | 0.000910387 |
| *AQP9* | 0.204880889427332 | 0.000911368 |
| *BEX4* | -0.2048533434 | 0.000912855 |
| *C14orf129* | 0.20484552156699 | 0.000913278 |
| *ZBTB39* | 0.204841785184881 | 0.00091348 |
| *PPP2R2B* | -0.2048402372 | 0.000913563 |
| *SNAI2* | 0.204827790916935 | 0.000914236 |
| *WDR43* | 0.204763178386133 | 0.000917738 |
| *APLP2* | -0.2047611453 | 0.000917849 |
| *C22orf39* | -0.2047325543 | 0.000919402 |
| *CPA3* | -0.2047207695 | 0.000920044 |
| *PSMD8* | 0.204609922776447 | 0.000926094 |
| *PLLP* | -0.2045521109 | 0.000929264 |
| *PHLPP2* | 0.204538914997056 | 0.000929989 |
| *TMEM164* | 0.204530229792526 | 0.000930467 |
| *MOBKL2B* | -0.2045269949 | 0.000930645 |
| *PZP* | -0.2044834651 | 0.000933041 |
| *NUDT13* | -0.2044722473 | 0.00093366 |
| *SLC45A2* | 0.204457614344828 | 0.000934467 |
| *PDCL2* | 0.204437182449043 | 0.000935596 |
| *C11orf67* | -0.2044311294 | 0.000935931 |
| *UBR2* | 0.204380432628192 | 0.000938737 |
| *RTBDN* | 0.204366919475741 | 0.000939487 |
| *WHAMML2* | -0.2043581314 | 0.000939974 |
| *BARD1* | 0.204354484442892 | 0.000940177 |
| *CCDC7* | 0.204309546037977 | 0.000942675 |
| *TMEM192* | -0.2042752801 | 0.000944583 |
| *GNB1* | 0.204232846027101 | 0.000946952 |
| *GGT8P* | 0.204196757806846 | 0.000948971 |
| *RPS6KA3* | 0.204158515691035 | 0.000951114 |
| *SCYL2* | 0.204157116368661 | 0.000951193 |
| *RPL17* | -0.2041031117 | 0.000954228 |
| *LSG1* | 0.204064461353598 | 0.000956405 |
| *RPS6* | -0.2040628029 | 0.000956499 |
| *XRRA1* | -0.2039621429 | 0.000962192 |
| *NIT1* | -0.2039269109 | 0.000964192 |
| *RFX8* | 0.203891823375856 | 0.000966187 |
| *ZMAT1* | -0.2038428343 | 0.00096898 |
| *LOC152024* | 0.203817211376827 | 0.000970443 |
| *DBP* | -0.2038151145 | 0.000970563 |
| *ANXA2* | 0.203793581379918 | 0.000971795 |
| *OAS3* | 0.203766266700239 | 0.000973359 |
| *ITGB4* | -0.2037596827 | 0.000973737 |
| *SCUBE2* | -0.2037481528 | 0.000974398 |
| *SERTAD3* | -0.2037171541 | 0.000976178 |
| *TMSB4Y* | -0.2036743375 | 0.000978641 |
| *MAGEA11* | 0.203643626923195 | 0.000980412 |
| *LAMP2* | 0.203632724978076 | 0.000981041 |
| *CASC1* | -0.2036297107 | 0.000981215 |
| *RREB1* | 0.203624625714679 | 0.000981509 |
| *PLA2G12A* | -0.2036139325 | 0.000982127 |
| *LOC80054* | -0.2035888054 | 0.00098358 |
| *C10orf137* | 0.203579423670317 | 0.000984123 |
| *SF3B4* | 0.203555237498068 | 0.000985524 |
| *MAGT1* | 0.203533706946242 | 0.000986773 |
| *MYH7B* | -0.2035250554 | 0.000987275 |
| *C21orf96* | 0.203465567887572 | 0.000990736 |
| *CT45A2* | 0.203439072358826 | 0.00099228 |
| *RPS25* | -0.2034378160 | 0.000992353 |
| *HNRNPA1L2* | 0.203414257809545 | 0.000993729 |
| *FBXO31* | -0.2034047825 | 0.000994283 |
| *HMGB3L1* | 0.203401497277443 | 0.000994475 |
| *LPPR5* | 0.20339705195469 | 0.000994735 |
| *TMEM127* | -0.2033854880 | 0.000995411 |
| *APOD* | -0.2033680743 | 0.00099643 |
| *FAM107A* | -0.2033056711 | 0.001000091 |
| *RGN* | -0.2033030523 | 0.001000245 |
| *SAPS2* | -0.2032857170 | 0.001001264 |
| *PRKCDBP* | -0.2032831433 | 0.001001416 |
| *PSMD2* | 0.203214730242806 | 0.001005448 |
| *FGL2* | -0.2031935214 | 0.001006702 |
| *UBE2MP1* | 0.203162455719323 | 0.00100854 |
| *ZNF611* | 0.203157396124284 | 0.00100884 |
| *XRCC1* | 0.203112280669967 | 0.001011515 |
| *KRT81* | 0.203104876932875 | 0.001011955 |
| *CC2D2A* | -0.2030512230 | 0.001015147 |
| *C11orf92* | -0.2030509531 | 0.001015163 |
| *HSPD1* | 0.203040618695174 | 0.001015779 |
| *KRTAP5-10* | -0.2030158186 | 0.001017258 |
| *ZNF438* | -0.2029904991 | 0.001018771 |
| *FTSJD2* | 0.20298766997229 | 0.00101894 |
| *TSPAN4* | -0.2029850926 | 0.001019094 |
| *EEF2K* | -0.2029767142 | 0.001019595 |
| *PIGY* | -0.2029623027 | 0.001020457 |
| *DBR1* | 0.202950401108642 | 0.00102117 |
| *NPTN* | -0.2029458423 | 0.001021443 |
| *ZNHIT2* | -0.2029426748 | 0.001021633 |
| *PLD4* | -0.2029108557 | 0.001023542 |
| *PIP5K1C* | -0.2029098509 | 0.001023602 |
| *LOC285033* | 0.202885286366797 | 0.001025078 |
| *SCN1B* | -0.2028830155 | 0.001025214 |
| *NUB1* | -0.2028815951 | 0.0010253 |
| *ATP5O* | -0.2028681841 | 0.001026106 |
| *TLE1* | -0.2028237816 | 0.001028781 |
| *AGA* | -0.2028164401 | 0.001029224 |
| *C17orf91* | -0.2028161526 | 0.001029241 |
| *PAQR9* | 0.202810419962211 | 0.001029587 |
| *ASXL1* | 0.202810057970852 | 0.001029609 |
| *MPG* | -0.2027996873 | 0.001030235 |
| *FBXL22* | -0.2027804365 | 0.001031398 |
| *TPM2* | -0.2027656391 | 0.001032293 |
| *HIST1H4A* | 0.202724440643984 | 0.001034789 |
| *CHMP2A* | -0.2027207696 | 0.001035011 |
| *FAU* | -0.2026838347 | 0.001037254 |
| *HEATR1* | 0.202672950592853 | 0.001037915 |
| *DNTTIP2* | 0.202614832431279 | 0.001041455 |
| *KCNH2* | -0.2026037333 | 0.001042132 |
| *RFX3* | 0.202584476849311 | 0.001043308 |
| *IL1F7* | 0.202574050383036 | 0.001043945 |
| *ALPK1* | -0.2025219151 | 0.001047137 |
| *MCAM* | -0.2025209039 | 0.001047199 |
| *PRPF38B* | 0.202439391965723 | 0.001052207 |
| *FGF7* | -0.2023973969 | 0.001054796 |
| *TMEM176A* | -0.2023970581 | 0.001054817 |
| *EID2* | 0.202378500992253 | 0.001055963 |
| *IQCF1* | 0.202375492392069 | 0.001056148 |
| *CCNB3* | 0.202370266288765 | 0.001056471 |
| *CD276* | 0.202342797224435 | 0.00105817 |
| *EHMT1* | 0.20231068727474 | 0.00106016 |
| *GLI3* | 0.202280247007113 | 0.001062049 |
| *SMAD3* | 0.202262702799439 | 0.001063139 |
| *ZAR1* | 0.20225016285304 | 0.001063918 |
| *NAE1* | 0.202245931985713 | 0.001064182 |
| *ELOVL4* | 0.202242114075903 | 0.001064419 |
| *HMX2* | 0.202235140477384 | 0.001064853 |
| *SEC1* | -0.2022279930 | 0.001065298 |
| *PRSS23* | -0.2021325953 | 0.001071255 |
| *CLPTM1L* | 0.202055650948077 | 0.001076082 |
| *ALDH1L1* | -0.2020513338 | 0.001076353 |
| *FAM47E* | -0.2020195824 | 0.001078351 |
| *KCTD20* | 0.20195576004271 | 0.001082378 |
| *FAM116B* | -0.2019233487 | 0.001084428 |
| *ZNF701* | 0.201915494422432 | 0.001084925 |
| *AGPS* | 0.201888929259486 | 0.001086609 |
| *SERPINA3* | -0.2018803541 | 0.001087153 |
| *PRRG2* | -0.2018097862 | 0.001091639 |
| *TESC* | -0.2017481552 | 0.001095571 |
| *FAM117A* | -0.2017201524 | 0.001097362 |
| *C2CD4A* | 0.201701232655642 | 0.001098574 |
| *ZCCHC11* | 0.201679132432681 | 0.001099991 |
| *MANBA* | -0.2016185672 | 0.001103882 |
| *PPP1R7* | -0.2016001007 | 0.001105071 |
| *NOP14* | 0.20158777558727 | 0.001105865 |
| *IDH2* | 0.201541034799455 | 0.001108881 |
| *CYB5R4* | 0.201490454866477 | 0.001112154 |
| *ZNF286A* | 0.201490048605632 | 0.001112181 |
| *LOX* | 0.201474221779456 | 0.001113207 |
| *CCDC101* | -0.2014648066 | 0.001113817 |
| *VAX1* | 0.201462441180896 | 0.001113971 |
| *RNASEK* | -0.2014030760 | 0.001117829 |
| *LOC348840* | 0.201351019519874 | 0.001121223 |
| *TXLNA* | 0.201339641579236 | 0.001121966 |
| *SPATS1* | 0.201336118626331 | 0.001122196 |
| *ZNF691* | -0.2013213241 | 0.001123163 |
| *PUS7L* | 0.201298471735069 | 0.001124658 |
| *MATN2* | -0.2012922331 | 0.001125066 |
| *SFRS11* | 0.201256213633564 | 0.001127427 |
| *TRIM22* | -0.2012268584 | 0.001129355 |
| *HSPB9* | -0.2012250611 | 0.001129473 |
| *CDC20B* | 0.201165712771055 | 0.00113338 |
| *SLC1A3* | 0.201149275535747 | 0.001134464 |
| *TRAPPC10* | 0.201149235368075 | 0.001134467 |
| *ABCA3* | -0.2010812259 | 0.001138963 |
| *PMFBP1* | 0.201072173269405 | 0.001139562 |
| *C9orf44* | -0.2010642621 | 0.001140087 |
| *OLFM1* | -0.2010603702 | 0.001140345 |
| *MRPL39* | 0.201023693867589 | 0.001142779 |
| *DUSP3* | -0.2010041770 | 0.001144076 |
| *SNX32* | -0.2009644592 | 0.00114672 |
| *LOC400794* | 0.200939028284168 | 0.001148416 |
| *DNAJB12* | -0.2009026449 | 0.001150847 |
| *TCFL5* | 0.200896557134759 | 0.001151254 |
| *UHRF1BP1* | 0.200871992931159 | 0.001152898 |
| *PDP1* | 0.200871826057536 | 0.001152909 |
| *PLEKHA4* | -0.2008383129 | 0.001155155 |
| *TMEM59* | -0.2008016267 | 0.001157619 |
| *SAGE1* | 0.200801296060928 | 0.001157641 |
| *APOM* | -0.2006714126 | 0.001166403 |
| *METTL2B* | 0.200651477842354 | 0.001167753 |
| *BCL2L2* | -0.2006438511 | 0.00116827 |
| *PGBD1* | 0.200636045703148 | 0.0011688 |
| *LOC100132707* | -0.2006009433 | 0.001171183 |
| *CDH11* | 0.200545168115169 | 0.001174978 |
| *CETN2* | -0.2005367323 | 0.001175553 |
| *SNHG8* | -0.2005205640 | 0.001176656 |
| *GBP2* | -0.2005110732 | 0.001177304 |
| *RGPD3* | 0.200455434711866 | 0.001181108 |
| *LAMB2L* | -0.2003978482 | 0.001185058 |
| *SDSL* | -0.2003728522 | 0.001186776 |
| *RGS10* | -0.2003683461 | 0.001187086 |
| *TMEM90A* | -0.2003595616 | 0.00118769 |
| *RPS15A* | -0.2003502160 | 0.001188333 |
| *KCNK13* | 0.200303020648618 | 0.001191587 |
| *LOC100009676* | -0.2002719874 | 0.001193732 |
| *TUBB2A* | 0.200266747384093 | 0.001194094 |
| *C2orf84* | -0.2002249885 | 0.001196986 |
| *BTC* | -0.2000489321 | 0.001209248 |
| *ZNF10* | -0.2000141822 | 0.001211681 |
| *C1QTNF7* | -0.2000115915 | 0.001211863 |
| *HPS1* | -0.1999945554 | 0.001213058 |
| *OXTR* | 0.199954148706889 | 0.001215897 |
| *DISC2* | 0.199948361088139 | 0.001216304 |
| *FUNDC1* | 0.199946523629124 | 0.001216433 |
| *LMBRD2* | 0.199945286803328 | 0.00121652 |
| *GARS* | 0.199908983766356 | 0.001219077 |
| *ABCC6* | -0.1998975873 | 0.00121988 |
| *GAGE2C* | 0.199825218819976 | 0.001224995 |
| *SYNGR1* | -0.1997546061 | 0.001230005 |
| *MTMR4* | 0.199715379438292 | 0.001232796 |
| *RBM18* | 0.199715105518943 | 0.001232815 |
| *BRD2* | 0.199628785183874 | 0.001238977 |
| *RBP7* | -0.1995952238 | 0.001241381 |
| *OTUD4* | 0.199524753756025 | 0.001246442 |
| *UBE2O* | 0.199505959974475 | 0.001247794 |
| *FAM106C* | 0.19948629454855 | 0.001249211 |
| *CARKD* | -0.1994588829 | 0.001251189 |
| *CAT* | -0.1994147903 | 0.001254376 |
| *RTP1* | -0.1994080183 | 0.001254866 |
| *ANKRD29* | -0.1993715131 | 0.001257512 |
| *RPLP2* | -0.1993666977 | 0.001257861 |
| *CCNO* | 0.199310610087934 | 0.001261936 |
| *CPSF6* | 0.19929296570114 | 0.001263221 |
| *ProSAPiP1* | -0.1992636551 | 0.001265357 |
| *NOP2* | 0.199263482706582 | 0.00126537 |
| *POPDC3* | 0.199237054567905 | 0.001267299 |
| *PARD6A* | -0.1992296850 | 0.001267838 |
| *KCTD10* | -0.1992060963 | 0.001269563 |
| *CCDC153* | -0.1991401650 | 0.001274395 |
| *FMN1* | 0.199090418867891 | 0.001278053 |
| *ACSL3* | 0.19907608974954 | 0.001279108 |
| *SNRPB2* | 0.199063197360727 | 0.001280059 |
| *TACC2* | -0.1990324171 | 0.00128233 |
| *FAM108B1* | 0.19901642833737 | 0.001283511 |
| *ECM2* | -0.1990045473 | 0.001284389 |
| *HCFC1R1* | -0.1990042960 | 0.001284408 |
| *ZNF410* | 0.198996032544282 | 0.001285019 |
| *RPN2* | 0.198929631470703 | 0.001289941 |
| *PRR24* | -0.1989266675 | 0.001290161 |
| *DDRGK1* | -0.1989233869 | 0.001290404 |
| *TMEM39B* | 0.198918876908526 | 0.00129074 |
| *CDH7* | 0.198902444284576 | 0.001291961 |
| *AGK* | 0.198884191533193 | 0.001293319 |
| *MET* | 0.198862903171513 | 0.001294904 |
| *LLGL1* | 0.198847851654928 | 0.001296026 |
| *IGDCC4* | 0.198829833291338 | 0.00129737 |
| *PLCG1* | 0.198815983362288 | 0.001298404 |
| *TRIM28* | 0.198790574982446 | 0.001300304 |
| *GAL3ST1* | -0.1987876890 | 0.001300519 |
| *KIF21B* | 0.198724827805303 | 0.00130523 |
| *COQ2* | 0.198692468109367 | 0.001307661 |
| *MRAS* | -0.1986872430 | 0.001308053 |
| *TRANK1* | -0.1986826572 | 0.001308398 |
| *ZNF697* | 0.198669519418064 | 0.001309387 |
| *ALG1L* | -0.1986543653 | 0.001310528 |
| *DLK2* | 0.198639925451697 | 0.001311616 |
| *ZNF425* | -0.1986196850 | 0.001313143 |
| *PMP22* | -0.1986187684 | 0.001313212 |
| *USP40* | -0.1986108745 | 0.001313808 |
| *CNTROB* | 0.198600017396506 | 0.001314628 |
| *C10orf32* | -0.1985855727 | 0.00131572 |
| *ZNF781* | -0.1985627248 | 0.001317449 |
| *CTSK* | -0.1985436467 | 0.001318894 |
| *C3orf26* | 0.198542649121192 | 0.001318969 |
| *SULT1A1* | -0.1984603241 | 0.001325221 |
| *TNFRSF9* | 0.198449309860053 | 0.00132606 |
| *ZNHIT6* | 0.198434764128894 | 0.001327168 |
| *GDAP2* | 0.198408459664275 | 0.001329174 |
| *POMT1* | -0.1983525268 | 0.001333449 |
| *MORF4* | 0.198345911449924 | 0.001333956 |
| *ZFX* | 0.198344268403152 | 0.001334081 |
| *FRYL* | 0.198335664313452 | 0.00133474 |
| *MYOCD* | -0.1982842262 | 0.001338687 |
| *FANCL* | 0.198254318728709 | 0.001340986 |
| *BCMO1* | -0.1982511780 | 0.001341228 |
| *NTN1* | -0.1982510263 | 0.001341239 |
| *NUMA1* | -0.1981447192 | 0.001349443 |
| *LDHD* | -0.1981378002 | 0.001349978 |
| *GATSL3* | -0.1981099978 | 0.001352132 |
| *KCNT1* | -0.1980314347 | 0.001358235 |
| *RNF185* | -0.1980044548 | 0.001360337 |
| *DNAJB9* | -0.1979858188 | 0.001361791 |
| *TLR3* | -0.1979619454 | 0.001363655 |
| *RAB33B* | -0.1979608627 | 0.001363739 |
| *RAB3D* | -0.1979064044 | 0.001368001 |
| *DNAJB11* | 0.197896057285058 | 0.001368812 |
| *RGL3* | -0.1978942965 | 0.00136895 |
| *GTF2H3* | 0.197868921969785 | 0.001370941 |
| *DFFA* | 0.197848895404322 | 0.001372514 |
| *MGC16275* | -0.1978307206 | 0.001373943 |
| *BBS2* | -0.1978291825 | 0.001374064 |
| *ING3* | 0.197818100051362 | 0.001374936 |
| *PYGO1* | 0.197816226455634 | 0.001375084 |
| *VSX2* | 0.197709532944918 | 0.001383508 |
| *HSP90B3P* | 0.197690090724684 | 0.001385048 |
| *TXNDC17* | 0.19766125574157 | 0.001387335 |
| *PEX19* | -0.1976336034 | 0.001389531 |
| *SUV420H2* | 0.197631741550743 | 0.001389679 |
| *ETNK2* | -0.1976309049 | 0.001389746 |
| *ASS1* | -0.1976301370 | 0.001389807 |
| *DPRX* | -0.1975711301 | 0.001394505 |
| *DOCK7* | 0.197513516327995 | 0.001399107 |
| *FLJ36031* | -0.1974963233 | 0.001400483 |
| *PKN2* | 0.197452030804608 | 0.001404033 |
| *TRDMT1* | 0.197423972580193 | 0.001406287 |
| *TUFT1* | 0.197401065102436 | 0.001408129 |
| *TRIM71* | 0.197380266738357 | 0.001409803 |
| *PHF8* | 0.197372683259246 | 0.001410414 |
| *VTN* | -0.1973424091 | 0.001412856 |
| *GPR173* | 0.197324515691686 | 0.001414301 |
| *PCCA* | -0.1973107038 | 0.001415417 |
| *GABRA3* | 0.197294139721333 | 0.001416757 |
| *CCDC56* | -0.1972888729 | 0.001417183 |
| *NOTCH4* | -0.1972880106 | 0.001417253 |
| *KIAA1683* | -0.1972610858 | 0.001419434 |
| *DBC1* | -0.1972523882 | 0.001420139 |
| *INTS2* | 0.197165892023276 | 0.001427169 |
| *CACNB3* | -0.1970708474 | 0.001434931 |
| *LCLAT1* | 0.197055044267515 | 0.001436225 |
| *IQSEC3* | -0.1970364860 | 0.001437747 |
| *STRAP* | 0.19703422169763 | 0.001437932 |
| *RPL27* | -0.1970154348 | 0.001439474 |
| *ZCCHC8* | 0.196966252116611 | 0.001443517 |
| *FAM122C* | 0.196944786702904 | 0.001445285 |
| *PEX11B* | -0.1969181222 | 0.001447484 |
| *CBWD6* | 0.196914203760329 | 0.001447808 |
| *SLC19A3* | -0.1969112362 | 0.001448053 |
| *ZNF669* | 0.19690892222786 | 0.001448244 |
| *CD40LG* | -0.1968976014 | 0.001449179 |
| *WNT3* | 0.196882563828737 | 0.001450421 |
| *EIF2AK3* | 0.196881018068936 | 0.001450549 |
| *LCTL* | 0.196880227145977 | 0.001450615 |
| *RNF34* | 0.196876395483945 | 0.001450931 |
| *TMEM120A* | -0.1968026653 | 0.001457041 |
| *HSPB7* | -0.1967432964 | 0.001461978 |
| *FOXG1* | 0.196743044529249 | 0.001461999 |
| *ARL1* | -0.1967310174 | 0.001463 |
| *LOC641367* | 0.196718971093571 | 0.001464005 |
| *JOSD2* | -0.1967108322 | 0.001464683 |
| *CCNG1* | -0.1967061466 | 0.001465074 |
| *CLEC2D* | 0.196629990843692 | 0.001471442 |
| *SUMF2* | -0.1965969338 | 0.001474213 |
| *DCBLD1* | 0.196589106983229 | 0.00147487 |
| *FSCN1* | 0.196587166841618 | 0.001475033 |
| *LRRC58* | 0.196569056127957 | 0.001476554 |
| *RNF14* | -0.1965312063 | 0.001479739 |
| *ACADM* | 0.196524412634309 | 0.001480311 |
| *MEX3B* | 0.196439635341412 | 0.001487468 |
| *TRIM72* | 0.196405169645497 | 0.001490387 |
| *DACT3* | -0.1963847261 | 0.00149212 |
| *MEX3A* | 0.196376274309947 | 0.001492838 |
| *CLEC3B* | -0.1963629497 | 0.001493969 |
| *CCDC154* | -0.1963107307 | 0.001498411 |
| *MIP* | 0.196269614025161 | 0.001501917 |
| *MDFIC* | 0.196260137203192 | 0.001502726 |
| *NARS2* | 0.196238112289681 | 0.001504608 |
| *SOAT2* | -0.1961962203 | 0.001508194 |
| *OAZ2* | -0.1961795554 | 0.001509623 |
| *MMP1* | 0.196166110144205 | 0.001510776 |
| *USP8* | 0.196161665554321 | 0.001511158 |
| *RIC3* | -0.1961138994 | 0.001515263 |
| *COMTD1* | -0.1961079459 | 0.001515776 |
| *NAV1* | 0.196072999830005 | 0.001518787 |
| *TBRG4* | 0.196002987118808 | 0.001524836 |
| *PTH1R* | -0.1959817069 | 0.001526679 |
| *ADRA1A* | -0.1959817044 | 0.001526679 |
| *NDST3* | 0.195970981624783 | 0.001527608 |
| *GUCA2B* | -0.1959162081 | 0.001532364 |
| *GDPD3* | -0.1959141918 | 0.001532539 |
| *CRIP2* | -0.1959027738 | 0.001533532 |
| *RPS6KA1* | 0.195893615843218 | 0.001534329 |
| *DAGLA* | 0.195885329001082 | 0.001535051 |
| *DHH* | -0.1958335929 | 0.001539562 |
| *TAL2* | 0.195828320350031 | 0.001540023 |
| *SOCS7* | 0.195825679808196 | 0.001540253 |
| *CTCF* | 0.195818807097694 | 0.001540854 |
| *HAO1* | 0.195780365298909 | 0.001544216 |
| *CSTF1* | 0.19572948884461 | 0.001548677 |
| *KCNA7* | 0.195716414860663 | 0.001549825 |
| *DHX36* | 0.195697464450744 | 0.001551491 |
| *PLA2G16* | -0.1956357833 | 0.001556924 |
| *PIP4K2B* | -0.1956265863 | 0.001557735 |
| *TPRA1* | -0.1956252064 | 0.001557857 |
| *MAPT* | -0.1956112151 | 0.001559093 |
| *GGT5* | -0.1956035015 | 0.001559774 |
| *COPZ2* | -0.1955720995 | 0.001562551 |
| *WDR88* | 0.195545424371465 | 0.001564914 |
| *MAPK9* | 0.195507846797488 | 0.001568248 |
| *GPAA1* | -0.1954916997 | 0.001569682 |
| *SSPN* | -0.1954643751 | 0.001572113 |
| *DDX24* | -0.1954607812 | 0.001572433 |
| *C6orf218* | 0.195459911214098 | 0.00157251 |
| *ITCH* | 0.195453426559604 | 0.001573088 |
| *COPS7A* | -0.1954511842 | 0.001573287 |
| *C2orf29* | 0.195393653890198 | 0.001578419 |
| *PHF20L1* | 0.195392385177833 | 0.001578532 |
| *ZNF350* | -0.1953275092 | 0.001584338 |
| *KRT19* | -0.1953149268 | 0.001585467 |
| *RNPEPL1* | -0.1953091900 | 0.001585981 |
| *PRDXDD1P* | -0.1952725108 | 0.001589275 |
| *PLEKHG5* | -0.1952705915 | 0.001589448 |
| *RAD51AP2* | 0.195263177996451 | 0.001590115 |
| *HTR2C* | 0.195249134976374 | 0.001591378 |
| *CA4* | -0.1952316027 | 0.001592957 |
| *FZD5* | 0.19523117455893 | 0.001592995 |
| *TOB2* | -0.1951895677 | 0.001596748 |
| *TULP4* | 0.195157912456176 | 0.001599608 |
| *C10orf76* | -0.1951572171 | 0.001599671 |
| *PAX3* | 0.195137346642894 | 0.001601469 |
| *RASA1* | 0.195122771692262 | 0.001602789 |
| *RTP4* | -0.1951102412 | 0.001603924 |
| *LETMD1* | -0.1951062289 | 0.001604288 |
| *C1orf220* | 0.195105246133857 | 0.001604377 |
| *CTPS* | 0.195098874533763 | 0.001604955 |
| *PYGB* | -0.1950301295 | 0.001611202 |
| *C3orf24* | 0.195015988556512 | 0.00161249 |
| *PRIMA1* | -0.1950080632 | 0.001613212 |
| *SCARNA17* | -0.1949929183 | 0.001614593 |
| *PRKAR2A* | 0.194952762818089 | 0.001618259 |
| *EID1* | -0.1949000457 | 0.001623084 |
| *ABCG2* | -0.1948807091 | 0.001624857 |
| *CCDC137* | 0.194870069402925 | 0.001625833 |
| *MAPK1* | 0.194869845876337 | 0.001625853 |
| *STBD1* | -0.1948149449 | 0.0016309 |
| *RNF160* | 0.194790973894934 | 0.001633108 |
| *MXRA5* | 0.194780823022438 | 0.001634043 |
| *PSMA7* | 0.194773455508863 | 0.001634723 |
| *TMED6* | 0.194766086254468 | 0.001635403 |
| *GPR172A* | 0.194766059336706 | 0.001635405 |
| *ANO10* | -0.1947548027 | 0.001636444 |
| *EPS15L1* | 0.194730172527237 | 0.00163872 |
| *LOC339535* | 0.19472824003809 | 0.001638899 |
| *PICK1* | -0.1947163929 | 0.001639995 |
| *LOC100190939* | -0.1946991071 | 0.001641595 |
| *CADPS2* | -0.1946821876 | 0.001643162 |
| *RPL22L1* | -0.1946712408 | 0.001644177 |
| *IL34* | -0.1946510868 | 0.001646047 |
| *MLLT11* | 0.194579569584409 | 0.001652698 |
| *ZFYVE1* | -0.1945791106 | 0.001652741 |
| *CSDA* | -0.1945124799 | 0.00165896 |
| *DMBT1* | 0.194502354026495 | 0.001659907 |
| *CD34* | -0.1944953744 | 0.00166056 |
| *SPOP* | -0.1944845078 | 0.001661577 |
| *ERLIN1* | 0.194466086724884 | 0.001663303 |
| *CES8* | -0.1944179712 | 0.001667818 |
| *C1orf131* | 0.194413022982195 | 0.001668283 |
| *ATG9A* | -0.1944117406 | 0.001668403 |
| *MUC15* | 0.19437252342136 | 0.001672093 |
| *IRGM* | 0.19436726300027 | 0.001672588 |
| *TBCB* | 0.194358455345174 | 0.001673418 |
| *EI24* | -0.1943561322 | 0.001673637 |
| *RAP2C* | 0.194301124737272 | 0.001678829 |
| *CYP3A7* | -0.1942520393 | 0.001683474 |
| *C3orf15* | -0.1942330957 | 0.00168527 |
| *IKBIP* | 0.194214648061606 | 0.001687021 |
| *RPL13A* | -0.1942119147 | 0.00168728 |
| *CCND3* | 0.1941859471 | 0.001689748 |
| *TRPM1* | 0.194157444783552 | 0.00169246 |
| *GLOD4* | 0.194079571163018 | 0.00169989 |
| *RUVBL1* | 0.194051618827737 | 0.001702564 |
| *MMP14* | 0.194043528291071 | 0.001703339 |
| *CEACAM16* | 0.193991211115162 | 0.001708357 |
| *C12orf70* | 0.193977149682059 | 0.001709708 |
| *GTF2H2* | 0.193943707505006 | 0.001712925 |
| *GSK3B* | 0.193935999556455 | 0.001713667 |
| *C10orf18* | 0.19393308882565 | 0.001713947 |
| *DLEU2L* | 0.193909522781783 | 0.001716219 |
| *CFB* | -0.1938345772 | 0.001723461 |
| *SEPT4* | -0.1938121605 | 0.001725632 |
| *ZNF512* | -0.1938096771 | 0.001725873 |
| *DYNC1LI1* | 0.193757474313491 | 0.00173094 |
| *KLHDC10* | 0.193739885095716 | 0.001732651 |
| *NUP35* | 0.193726852458525 | 0.001733919 |
| *SHISA5* | -0.1937053493 | 0.001736013 |
| *FAM199X* | 0.193700604729293 | 0.001736476 |
| *PPPDE1* | 0.193700260559977 | 0.001736509 |
| *CAPZA2* | -0.1936805527 | 0.001738432 |
| *LOC440563* | 0.193600554706378 | 0.001746254 |
| *MLLT4* | 0.193570666518998 | 0.001749185 |
| *C18orf34* | -0.1935354780 | 0.001752641 |
| *ESYT2* | -0.1935353371 | 0.001752655 |
| *UQCR11* | -0.1935346563 | 0.001752722 |
| *FOXD3* | 0.193511223171902 | 0.001755028 |
| *APOA1BP* | -0.1935025214 | 0.001755884 |
| *NUDT2* | -0.1934554861 | 0.001760522 |
| *OLFML1* | -0.1934454485 | 0.001761513 |
| *SMNDC1* | 0.193381782739322 | 0.001767811 |
| *C19orf76* | -0.1933635391 | 0.00176962 |
| *HIST1H2AE* | 0.193346032048099 | 0.001771357 |
| *CCDC3* | -0.1933252613 | 0.00177342 |
| *BEST2* | 0.193305445227071 | 0.001775391 |
| *PDRG1* | 0.193288642923903 | 0.001777063 |
| *VKORC1L1* | 0.193235647847129 | 0.001782346 |
| *RAB3IP* | 0.193191652908613 | 0.001786743 |
| *LOC148696* | -0.1931835496 | 0.001787554 |
| *SLC35A3* | 0.193174781782563 | 0.001788432 |
| *ANAPC10* | 0.19316561926288 | 0.00178935 |
| *ZFP30* | 0.193153735362948 | 0.001790541 |
| *DIS3L* | 0.193116556888389 | 0.001794272 |
| *PNMA1* | -0.1930961373 | 0.001796324 |
| *MTRF1* | 0.193073754848536 | 0.001798576 |
| *PTPN9* | 0.193052907976946 | 0.001800676 |
| *C1orf124* | 0.193050400634404 | 0.001800928 |
| *RFX7* | 0.193046773878793 | 0.001801294 |
| *GRK6* | 0.193020838965365 | 0.00180391 |
| *HIST2H3D* | 0.192993215503315 | 0.0018067 |
| *NUFIP1* | 0.192975760131775 | 0.001808465 |
| *LOC145837* | 0.192972110486746 | 0.001808835 |
| *CHM* | 0.192963077411026 | 0.001809749 |
| *HTR2B* | -0.1929254878 | 0.001813558 |
| *FLJ35220* | -0.1928912146 | 0.001817037 |
| *C11orf70* | -0.1928714014 | 0.001819052 |
| *ATP6V0D2* | 0.192864744193551 | 0.001819729 |
| *SPEF2* | -0.1928197112 | 0.001824316 |
| *RGAG1* | 0.192806123415061 | 0.001825702 |
| *CANT1* | 0.192771859157159 | 0.001829202 |
| *SERPINE3* | 0.192759635404738 | 0.001830452 |
| *DQX1* | 0.192712856245358 | 0.001835243 |
| *ARFGEF1* | 0.192637245652133 | 0.001843011 |
| *C7orf41* | -0.1926283887 | 0.001843923 |
| *FAM50B* | -0.1926119911 | 0.001845612 |
| *C10orf108* | -0.1925995218 | 0.001846898 |
| *RAB15* | 0.19258556381426 | 0.001848338 |
| *AOX1* | -0.1925405905 | 0.001852985 |
| *TUBGCP3* | 0.192522018324078 | 0.001854907 |
| *GIN1* | -0.1924897949 | 0.001858246 |
| *KIAA0391* | 0.192484833104599 | 0.001858761 |
| *ELAVL2* | 0.192419411263594 | 0.001865559 |
| *DISP1* | -0.1923943708 | 0.001868167 |
| *KANK1* | -0.1923761210 | 0.001870069 |
| *SLC25A28* | -0.1923759544 | 0.001870087 |
| *RAB3C* | -0.1923727171 | 0.001870425 |
| *SNTB1* | 0.19235249930117 | 0.001872535 |
| *KLHL18* | 0.192328419369744 | 0.001875051 |
| *NAA20* | 0.19232024149333 | 0.001875907 |
| *ZNF324B* | 0.192315294413252 | 0.001876424 |
| *PDZK1IP1* | -0.1923000267 | 0.001878023 |
| *RHOQ* | -0.1922581289 | 0.001882415 |
| *CRHBP* | -0.1922134259 | 0.001887111 |
| *ADD1* | -0.1921995533 | 0.001888571 |
| *PLAC1* | 0.192177967773459 | 0.001890844 |
| *N4BP2L2* | -0.1921776314 | 0.00189088 |
| *ARMC10* | -0.1921594527 | 0.001892796 |
| *ELAC1* | -0.1921338294 | 0.0018955 |
| *BBS5* | -0.1921184515 | 0.001897125 |
| *C16orf89* | -0.1921057020 | 0.001898473 |
| *NINJ1* | -0.1920919270 | 0.00189993 |
| *HPS4* | 0.192085605593483 | 0.001900599 |
| *ASB3* | 0.192050947169349 | 0.001904272 |
| *LOC388387* | -0.1920358112 | 0.001905878 |
| *ZYX* | -0.1919952585 | 0.001910186 |
| *RCBTB2* | -0.1919708077 | 0.001912788 |
| *RTL1* | 0.191866456523931 | 0.00192393 |
| *CKMT1B* | 0.191849243756003 | 0.001925774 |
| *ACTG2* | -0.1918473780 | 0.001925974 |
| *MFNG* | -0.1918102539 | 0.001929955 |
| *CHKA* | 0.191796995788119 | 0.001931379 |
| *CELSR3* | 0.19171017007892 | 0.001940728 |
| *ATP5L* | -0.1917091753 | 0.001940835 |
| *POFUT1* | 0.191657986612721 | 0.001946366 |
| *SGMS1* | -0.1916169240 | 0.001950813 |
| *SRP54* | 0.191605960785205 | 0.001952002 |
| *C11orf41* | 0.191604984489091 | 0.001952108 |
| *LSM3* | 0.191586911941687 | 0.00195407 |
| *ADHFE1* | -0.1915773622 | 0.001955107 |
| *C5orf56* | -0.1915192590 | 0.001961428 |
| *ATAD2B* | 0.191516642960282 | 0.001961713 |
| *SMS* | 0.191457126761372 | 0.001968209 |
| *DMP1* | 0.191450585830935 | 0.001968924 |
| *DDX31* | 0.191432163471151 | 0.001970939 |
| *HIST1H2BG* | 0.191406979592512 | 0.001973697 |
| *ADPRH* | -0.1913785857 | 0.00197681 |
| *STIM2* | 0.191269465616424 | 0.001988818 |
| *MTIF2* | 0.191233138934863 | 0.00199283 |
| *RBM27* | 0.191232657630458 | 0.001992883 |
| *PA2G4* | 0.191200424002402 | 0.00199645 |
| *NCOA4* | -0.1911949780 | 0.001997053 |
| *FRG1* | -0.1911606495 | 0.002000858 |
| *UBXN2A* | 0.191156283447365 | 0.002001343 |
| *ZNF100* | 0.191135619321256 | 0.002003637 |
| *MAGEA8* | 0.191096914318938 | 0.002007941 |
| *HDAC8* | 0.191053458873008 | 0.002012784 |
| *SBNO1* | 0.191035958460364 | 0.002014737 |
| *EBF4* | -0.1910253342 | 0.002015924 |
| *PPHLN1* | 0.190998615713646 | 0.002018911 |
| *SNX8* | 0.190957882943754 | 0.002023472 |
| *SORBS1* | -0.1909101178 | 0.002028833 |
| *C7orf57* | 0.19088026310537 | 0.00203219 |
| *ZNF267* | 0.190810232633199 | 0.002040085 |
| *HSPA9* | 0.190761993812407 | 0.00204554 |
| *TMEM141* | -0.1907468397 | 0.002047256 |
| *VCPIP1* | 0.190690993312237 | 0.002053592 |
| *NPTXR* | -0.1906857763 | 0.002054185 |
| *ZNF135* | -0.1906785039 | 0.002055012 |
| *FAM27A* | -0.1906721990 | 0.002055728 |
| *TAF1* | 0.190663251910062 | 0.002056746 |
| *HIST1H3D* | 0.190652967903155 | 0.002057917 |
| *CNTN4* | -0.1906364708 | 0.002059795 |
| *PLXNB2* | -0.1906125566 | 0.002062522 |
| *RHOD* | -0.1906076255 | 0.002063084 |
| *HDHD2* | -0.1905940127 | 0.002064638 |
| *ZNF69* | 0.190547524953172 | 0.002069952 |
| *EDEM3* | 0.190486697854036 | 0.002076924 |
| *C6orf203* | -0.1904420074 | 0.00208206 |
| *CD2BP2* | -0.1904111427 | 0.002085614 |
| *ZNF219* | -0.1903824253 | 0.002088925 |
| *RPL29* | -0.1903783763 | 0.002089393 |
| *ARG2* | 0.190314850905857 | 0.002096737 |
| *KIAA0141* | -0.1902714871 | 0.002101763 |
| *FAM198A* | -0.1902237723 | 0.002107307 |
| *C6orf129* | 0.190215559922872 | 0.002108263 |
| *POLD4* | -0.1902112355 | 0.002108766 |
| *SCN3A* | -0.1902069491 | 0.002109265 |
| *SAFB* | 0.190184730089197 | 0.002111853 |
| *CBLN3* | -0.1901760756 | 0.002112862 |
| *PMM2* | 0.190171014803643 | 0.002113452 |
| *NUDT16* | -0.1901697494 | 0.0021136 |
| *FAM169B* | -0.1901514543 | 0.002115735 |
| *ATP7A* | 0.190011529195902 | 0.002132129 |
| *C16orf58* | -0.1900078291 | 0.002132564 |
| *MFN2* | 0.189998025198944 | 0.002133717 |
| *ETV1* | 0.189982897088497 | 0.002135497 |
| *STX1A* | 0.189935845297372 | 0.002141044 |
| *CTNNBIP1* | 0.189930110281611 | 0.002141721 |
| *LOC100128076* | -0.1899236074 | 0.002142489 |
| *RNF138P1* | 0.189916387751984 | 0.002143341 |
| *MKRN1* | -0.1899040165 | 0.002144803 |
| *ZFYVE28* | -0.1898994907 | 0.002145338 |
| *SIGLEC6* | -0.1898971873 | 0.002145611 |
| *LYL1* | -0.1898829345 | 0.002147297 |
| *SLC44A4* | -0.1897916885 | 0.002158119 |
| *PEG3* | -0.1897665090 | 0.002161114 |
| *FCGRT* | -0.1897483835 | 0.002163273 |
| *ZBED5* | -0.1897473404 | 0.002163397 |
| *PDZD9* | -0.1897069366 | 0.002168216 |
| *ERBB2* | -0.1897061856 | 0.002168306 |
| *CCNG2* | -0.1897061610 | 0.002168309 |
| *MGC87042* | 0.189567629708966 | 0.002184906 |
| *C20orf132* | -0.1895613631 | 0.002185659 |
| *SNRPN* | -0.1895258649 | 0.002189932 |
| *HTR3A* | 0.18943774363581 | 0.002200572 |
| *CLEC16A* | 0.189416927979906 | 0.002203092 |
| *C2orf49* | 0.189388043633893 | 0.002206593 |
| *ANKAR* | -0.1893740733 | 0.002208289 |
| *CAMTA1* | 0.189316719761205 | 0.002215261 |
| *SBK2* | 0.189281862241179 | 0.002219509 |
| *DLGAP1* | 0.189251064898843 | 0.002223267 |
| *C3orf20* | 0.189245483535708 | 0.002223949 |
| *TEX19* | 0.189231925289272 | 0.002225606 |
| *SHF* | -0.1891930175 | 0.002230368 |
| *AGGF1* | 0.189185413377427 | 0.0022313 |
| *ADI1* | -0.1891846986 | 0.002231387 |
| *CELF6* | -0.1891743416 | 0.002232657 |
| *C3orf52* | 0.189172102331473 | 0.002232931 |
| *FSCN2* | -0.1891514366 | 0.002235467 |
| *ZNF174* | -0.1891361522 | 0.002237344 |
| *ADCY5* | -0.1891340488 | 0.002237602 |
| *SLC35A1* | -0.1890950635 | 0.002242397 |
| *IMPAD1* | 0.189092693165187 | 0.002242689 |
| *RDH8* | 0.189087287486448 | 0.002243354 |
| *PSPC1* | 0.189071889995331 | 0.002245251 |
| *PSD3* | 0.188955891466361 | 0.002259589 |
| *CHRNB2* | 0.18894273556289 | 0.00226122 |
| *ZDHHC20* | 0.188812228387293 | 0.002277462 |
| *TSPAN31* | -0.1887427397 | 0.002286153 |
| *SALL3* | 0.188724281010889 | 0.002288466 |
| *MED8* | 0.188702128812505 | 0.002291246 |
| *TRAF5* | -0.1887007117 | 0.002291424 |
| *TUBB3* | 0.188665170196491 | 0.00229589 |
| *XPO6* | 0.188585071913903 | 0.002305985 |
| *PACSIN3* | -0.1885815945 | 0.002306424 |
| *SIGLECP3* | -0.1885610768 | 0.002309016 |
| *C8orf76* | 0.188559037513999 | 0.002309274 |
| *C19orf54* | 0.188546919496133 | 0.002310807 |
| *AIM2* | 0.188535152925751 | 0.002312296 |
| *ASB8* | -0.1885262546 | 0.002313423 |
| *SH2D4A* | 0.188517211764563 | 0.002314568 |
| *DPF3* | 0.188508690282195 | 0.002315648 |
| *TIFA* | 0.188493132016055 | 0.002317621 |
| *SQRDL* | -0.1884539660 | 0.002322594 |
| *SH3BP5* | -0.1884460364 | 0.002323603 |
| *TM9SF4* | 0.188416032252992 | 0.002327421 |
| *C19orf52* | 0.188414729133078 | 0.002327587 |
| *PSMD3* | 0.188400606683394 | 0.002329386 |
| *DPY19L4* | 0.188382883064804 | 0.002331645 |
| *ZNF835* | -0.1883802244 | 0.002331985 |
| *FAM82A2* | 0.188358272900025 | 0.002334787 |
| *PREP* | 0.18835494020908 | 0.002335212 |
| *ZNF585A* | 0.188303518178597 | 0.002341789 |
| *OTUB2* | 0.18829999701961 | 0.00234224 |
| *TRPM4* | -0.1882138965 | 0.002353292 |
| *SAG* | -0.1881649653 | 0.002359594 |
| *C9orf71* | -0.1881517789 | 0.002361294 |
| *CER1* | 0.188125148460076 | 0.002364733 |
| *UQCRHL* | 0.188120509127834 | 0.002365332 |
| *RAB1B* | -0.1881057207 | 0.002367244 |
| *DICER1* | 0.188049497751435 | 0.002374526 |
| *WFDC1* | -0.1880453055 | 0.002375069 |
| *GRID2* | 0.187998113489189 | 0.002381198 |
| *LOC284551* | 0.187974513207976 | 0.002384268 |
| *SLC6A16* | -0.1879392982 | 0.002388857 |
| *FAM156A* | 0.187936310744787 | 0.002389246 |
| *TLN2* | 0.187912972188288 | 0.002392292 |
| *EMX1* | 0.187903093727994 | 0.002393582 |
| *PELO* | -0.1878881726 | 0.002395532 |
| *NUDCD3* | -0.1878875707 | 0.002395611 |
| *LECT2* | 0.187877582869853 | 0.002396917 |
| *POLR1B* | 0.187860107084832 | 0.002399204 |
| *UBAP2* | 0.1878328037705 | 0.00240278 |
| *PRO1768* | 0.187794422418511 | 0.002407817 |
| *MAPK1IP1L* | 0.187743878867133 | 0.002414464 |
| *LOC729234* | -0.1877095433 | 0.002418989 |
| *SNX5* | 0.187686429388072 | 0.002422039 |
| *SR140* | 0.187668603308069 | 0.002424394 |
| *C7orf46* | 0.187665418311128 | 0.002424815 |
| *GAGE2E* | 0.18759375847225 | 0.002434304 |
| *CDH3* | -0.1874671171 | 0.002451157 |
| *CRIP3* | -0.1874497923 | 0.002453471 |
| *CLCA3P* | 0.187434295928305 | 0.002455542 |
| *DUSP7* | 0.187374149362061 | 0.002463596 |
| *C7orf70* | 0.187365108161238 | 0.002464809 |
| *LOC100130015* | -0.1873413833 | 0.002467994 |
| *FGF13* | -0.1873409197 | 0.002468056 |
| *ZNF260* | 0.187328920564397 | 0.002469669 |
| *LOC100133957* | 0.187326171584737 | 0.002470038 |
| *ST3GAL1* | -0.1872903007 | 0.002474864 |
| *INSM2* | 0.187225441153441 | 0.002483613 |
| *FOXF1* | -0.1872031893 | 0.002486621 |
| *MR1* | -0.1871983225 | 0.002487279 |
| *ZBTB16* | -0.1871965514 | 0.002487519 |
| *RBP1* | -0.1871804883 | 0.002489693 |
| *DGKH* | 0.187170511248434 | 0.002491044 |
| *NOL12* | 0.187156688445234 | 0.002492917 |
| *AGPAT2* | -0.1871385184 | 0.002495381 |
| *SYNGR2* | -0.1870429845 | 0.002508374 |
| *FRZB* | -0.1870186086 | 0.002511699 |
| *PXDN* | 0.187016722572211 | 0.002511957 |
| *WNT5A* | 0.187007949074705 | 0.002513155 |
| *RTEL1* | 0.18700732472626 | 0.00251324 |
| *ELTD1* | -0.1870039601 | 0.002513699 |
| *PSMG3* | 0.186993711139255 | 0.0025151 |
| *LTBR* | -0.1869834036 | 0.002516509 |
| *LOC441869* | -0.1869777604 | 0.00251728 |
| *MRPL53* | -0.1869203047 | 0.002525149 |
| *STARD7* | 0.186913396817016 | 0.002526097 |
| *SRD5A2* | 0.186910449662379 | 0.002526501 |
| *SHARPIN* | -0.1868992834 | 0.002528034 |
| *OR2T4* | 0.186874883835192 | 0.002531386 |
| *ESF1* | 0.186870667656731 | 0.002531966 |
| *ERBB2IP* | 0.186860476373954 | 0.002533367 |
| *RPS9* | -0.1868289902 | 0.002537702 |
| *CIB4* | -0.1867954405 | 0.002542328 |
| *NPBWR1* | 0.186789302466308 | 0.002543175 |
| *SNW1* | 0.186768134059308 | 0.002546099 |
| *IRS2* | -0.1867549428 | 0.002547922 |
| *HOXA1* | 0.186751889408909 | 0.002548344 |
| *RBM43* | -0.1867404845 | 0.002549922 |
| *MOSC2* | -0.1867262464 | 0.002551893 |
| *RNF208* | -0.1866690402 | 0.002559826 |
| *FOXP3* | 0.186642450512461 | 0.00256352 |
| *ZAR1L* | 0.186598545818653 | 0.002569632 |
| *RPN1* | 0.186587345681251 | 0.002571193 |
| *SNHG4* | 0.186563589140051 | 0.002574507 |
| *FOXE1* | 0.186549290940758 | 0.002576504 |
| *WASH2P* | -0.1864412214 | 0.00259164 |
| *NBL1* | -0.1864389379 | 0.002591961 |
| *ADSL* | 0.186429022485666 | 0.002593353 |
| *PXMP2* | 0.186374060185944 | 0.002601087 |
| *TXLNG* | 0.186371906158349 | 0.002601391 |
| *BTBD6* | 0.186352335645284 | 0.00260415 |
| *ZBTB2* | 0.186335035043748 | 0.002606591 |
| *KIAA1949* | 0.18632952998254 | 0.002607368 |
| *CHCHD4* | 0.186299858480419 | 0.002611561 |
| *LRFN4* | 0.186298482450185 | 0.002611756 |
| *MFSD2A* | 0.186268328138451 | 0.002616023 |
| *MTVR2* | 0.18624938777542 | 0.002618707 |
| *FARSB* | 0.186228303310135 | 0.002621698 |
| *TXNDC12* | 0.186204241763869 | 0.002625114 |
| *MOAP1* | -0.1861928827 | 0.002626729 |
| *PARP16* | 0.186182318263713 | 0.002628231 |
| *DNAJC21* | 0.186177934527755 | 0.002628855 |
| *SLC35B4* | 0.186169665397659 | 0.002630031 |
| *CDK5R2* | 0.186168316389893 | 0.002630223 |
| *PACS1* | -0.1861669708 | 0.002630415 |
| *FBXL18* | 0.18616188125911 | 0.002631139 |
| *PALLD* | -0.1861408665 | 0.002634133 |
| *ESCO1* | 0.186072817487035 | 0.002643848 |
| *TAF7L* | 0.186054062632968 | 0.002646531 |
| *RGS20* | 0.186028943003589 | 0.002650128 |
| *MED10* | 0.186025107617344 | 0.002650678 |
| *LEFTY1* | -0.1860118746 | 0.002652576 |
| *OR7C1* | 0.186007937885755 | 0.00265314 |
| *KIAA0947* | 0.186005733462332 | 0.002653457 |
| *RGS11* | -0.1859944892 | 0.00265507 |
| *TTC24* | 0.185944995177696 | 0.002662184 |
| *LOC100192378* | 0.185942541691954 | 0.002662537 |
| *C10orf4* | -0.1859261288 | 0.0026649 |
| *B3GALT2* | -0.1858519284 | 0.002675607 |
| *EMILIN1* | -0.1858474255 | 0.002676258 |
| *AP2A2* | -0.1858250059 | 0.002679502 |
| *EIF5A* | 0.185790586439784 | 0.002684488 |
| *TCEB3C* | 0.185790295983466 | 0.00268453 |
| *LOC100130932* | 0.185749588581883 | 0.002690439 |
| *MFSD5* | -0.1857215411 | 0.002694516 |
| *STIM1* | -0.1857166449 | 0.002695229 |
| *C6orf153* | 0.185700787677497 | 0.002697537 |
| *KRTAP19-8* | 0.185684422465692 | 0.002699922 |
| *RPL15* | -0.1856787606 | 0.002700747 |
| *EIF4E3* | -0.1856564141 | 0.002704007 |
| *NKAPL* | -0.1856277127 | 0.002708199 |
| *SLC16A5* | -0.1856165669 | 0.002709828 |
| *H3F3B* | 0.185592943719253 | 0.002713285 |
| *PTDSS2* | -0.1855825174 | 0.002714812 |
| *SEC11A* | 0.185522816034488 | 0.00272357 |
| *PGPEP1L* | -0.1855174620 | 0.002724357 |
| *PIAS1* | 0.18548840660497 | 0.00272863 |
| *CT45A4* | 0.185464642532141 | 0.002732129 |
| *HEXIM2* | -0.1854511491 | 0.002734117 |
| *CPLX1* | -0.1854189052 | 0.002738875 |
| *LARS2* | 0.185399949659083 | 0.002741675 |
| *PRKRIR* | 0.185392578628503 | 0.002742765 |
| *HEATR2* | 0.185388991534255 | 0.002743295 |
| *ASXL3* | -0.1853579125 | 0.002747895 |
| *ARAP1* | -0.1853436896 | 0.002750002 |
| *XPR1* | 0.185343388029926 | 0.002750047 |
| *MRRF* | 0.18531646312496 | 0.00275404 |
| *ZNF829* | 0.18527742702932 | 0.002759838 |
| *TMEM187* | -0.1852772304 | 0.002759868 |
| *CFHR4* | 0.185180579067892 | 0.002774273 |
| *KIAA1539* | -0.1851746887 | 0.002775153 |
| *SNHG3* | 0.18514496782565 | 0.002779598 |
| *CYorf15B* | -0.1851133369 | 0.002784335 |
| *KLF2* | -0.1851029443 | 0.002785893 |
| *PARP3* | -0.1849800517 | 0.002804378 |
| *MMP28* | -0.1848847752 | 0.002818785 |
| *WDR60* | -0.1848634568 | 0.002822018 |
| *C21orf71* | -0.1848569514 | 0.002823006 |
| *NDUFA10* | -0.1848520215 | 0.002823754 |
| *CAPN11* | -0.1848237385 | 0.002828051 |
| *HIST1H2BA* | 0.184813783121377 | 0.002829564 |
| *HUWE1* | 0.184812527733248 | 0.002829755 |
| *ANTXR2* | -0.1847921015 | 0.002832864 |
| *ZNF41* | 0.184770934505857 | 0.002836088 |
| *RBP5* | -0.1847643474 | 0.002837092 |
| *NME1-NME2* | 0.184753203854736 | 0.002838792 |
| *PCNT* | 0.184699516499787 | 0.002846992 |
| *UHRF2* | 0.184696697692358 | 0.002847423 |
| *ATL3* | 0.184673853555453 | 0.00285092 |
| *PON1* | 0.184664614815624 | 0.002852335 |
| *MTUS1* | -0.1846552970 | 0.002853763 |
| *MT1DP* | -0.1846533937 | 0.002854055 |
| *MTMR9L* | -0.1846438817 | 0.002855513 |
| *MRPL33* | -0.1846378099 | 0.002856444 |
| *CNKSR3* | 0.184632672087274 | 0.002857233 |
| *PURB* | 0.184628863299998 | 0.002857817 |
| *FAM70A* | 0.184615217443079 | 0.002859912 |
| *HOXB3* | -0.1845448054 | 0.002870744 |
| *DYRK1B* | -0.1845432154 | 0.002870989 |
| *PLEKHG4* | 0.184534190934143 | 0.00287238 |
| *NCRNA00173* | -0.1845293344 | 0.002873129 |
| *MRPL55* | -0.1845049001 | 0.0028769 |
| *MAN2A2* | 0.184469060498332 | 0.002882438 |
| *LMO7* | 0.184463784469154 | 0.002883254 |
| *MPP4* | 0.184453144677134 | 0.002884901 |
| *EIF3L* | -0.1844467264 | 0.002885895 |
| *CMPK1* | 0.184414162544703 | 0.002890941 |
| *FABP5* | 0.184301923948258 | 0.002908395 |
| *PDIA4* | 0.184280555540066 | 0.002911729 |
| *MRPL13* | 0.184250197025513 | 0.002916472 |
| *MLF1* | 0.184216442965391 | 0.002921753 |
| *EIF5* | 0.184175798491386 | 0.002928123 |
| *SOX2* | 0.18417148668083 | 0.0029288 |
| *FANK1* | -0.1841352705 | 0.002934488 |
| *EPHA3* | 0.18412899217681 | 0.002935475 |
| *HACE1* | 0.184121029118867 | 0.002936728 |
| *DUSP9* | 0.184090551151432 | 0.002941526 |
| *QPRT* | -0.1840829923 | 0.002942717 |
| *MED20* | 0.184012123359442 | 0.002953906 |
| *LOC100240735* | -0.1839934978 | 0.002956853 |
| *AIDA* | -0.1839716185 | 0.002960318 |
| *C19orf23* | 0.183930877902005 | 0.00296678 |
| *SLC41A3* | -0.1839186145 | 0.002968728 |
| *EXOC3L* | -0.1838981798 | 0.002971976 |
| *DNALI1* | -0.1838866469 | 0.00297381 |
| *ZC3H6* | -0.1838791110 | 0.00297501 |
| *EDA2R* | -0.1838303936 | 0.002982773 |
| *STXBP5* | 0.183825752690931 | 0.002983514 |
| *DEPDC6* | -0.1837631700 | 0.002993516 |
| *CD79B* | -0.1837035729 | 0.00300307 |
| *LNPEP* | 0.183703108917945 | 0.003003144 |
| *KCNIP4* | -0.1836959076 | 0.003004301 |
| *ITGAE* | 0.183666105924886 | 0.00300909 |
| *RPL13* | -0.1836495781 | 0.003011749 |
| *SSX8* | 0.183618896621539 | 0.003016691 |
| *ST8SIA4* | 0.183618765456923 | 0.003016712 |
| *DLEU2* | 0.18356539512575 | 0.003025327 |
| *LOC729156* | -0.1835624443 | 0.003025803 |
| *ESD* | -0.1835303488 | 0.003030995 |
| *KLHL30* | -0.1834776036 | 0.003039545 |
| *GRIN3A* | 0.183453268399784 | 0.003043497 |
| *TPK1* | -0.1834507152 | 0.003043912 |
| *BET1L* | -0.1834503471 | 0.003043972 |
| *TBX4* | 0.183425826200556 | 0.003047959 |
| *FOXI3* | 0.18338992651971 | 0.003053805 |
| *CSGALNACT1* | -0.1833676620 | 0.003057436 |
| *MGC70857* | -0.1833670932 | 0.003057529 |
| *OTP* | 0.183357313967451 | 0.003059125 |
| *PRDM4* | 0.183280632865953 | 0.003071667 |
| *PYCR2* | -0.1832798060 | 0.003071802 |
| *MMP23B* | -0.1832752416 | 0.00307255 |
| *CDH9* | 0.183250113455419 | 0.003076671 |
| *ARGFXP2* | 0.18322588760348 | 0.003080649 |
| *SLC27A5* | -0.1832175167 | 0.003082024 |
| *FCF1* | 0.183214374907055 | 0.003082541 |
| *C21orf33* | -0.1832044374 | 0.003084175 |
| *ALKBH7* | -0.1831653253 | 0.003090613 |
| *EN1* | 0.183155617789385 | 0.003092213 |
| *PRKAB1* | -0.1831505839 | 0.003093043 |
| *GPR158* | 0.183144536418865 | 0.00309404 |
| *MYH1* | 0.183139093502662 | 0.003094938 |
| *PSORS1C3* | 0.183126915174396 | 0.003096948 |
| *SLIT2* | 0.183109504060136 | 0.003099823 |
| *ANKRD42* | -0.1831084107 | 0.003100004 |
| *EPHB2* | 0.183073640950179 | 0.003105754 |
| *STRBP* | 0.183063347432335 | 0.003107458 |
| *MSRB3* | -0.1830628070 | 0.003107547 |
| *PHGR1* | -0.1830356184 | 0.003112052 |
| *STRA13* | 0.183021875100422 | 0.003114332 |
| *KRT4* | 0.183019820328551 | 0.003114673 |
| *SERPINF2* | -0.1829942468 | 0.003118919 |
| *DEFB123* | 0.182991043587669 | 0.003119451 |
| *MMRN1* | -0.1829476637 | 0.003126667 |
| *TRPC7* | 0.182943642887028 | 0.003127336 |
| *PTPRQ* | 0.182907310612883 | 0.003133393 |
| *SHKBP1* | 0.182890865250776 | 0.003136137 |
| *NR1H3* | -0.1828568304 | 0.003141825 |
| *MMAA* | -0.1828340586 | 0.003145636 |
| *ZMYND15* | -0.1828332456 | 0.003145772 |
| *ACTL6B* | 0.182805991267811 | 0.003150338 |
| *ACSM5* | -0.1827977842 | 0.003151714 |
| *CCKAR* | 0.182795230212556 | 0.003152143 |
| *IL23R* | 0.182763229354787 | 0.003157515 |
| *TRIM62* | 0.18276154037423 | 0.003157798 |
| *CNIH2* | 0.182743710190398 | 0.003160795 |
| *IL1RAP* | 0.182732180544996 | 0.003162735 |
| *SMURF1* | 0.182690777388575 | 0.003169708 |
| *CDKN1B* | -0.1826777333 | 0.003171908 |
| *ATG4C* | 0.182670468374181 | 0.003173133 |
| *KIAA0513* | -0.1826679687 | 0.003173555 |
| *CXorf56* | 0.182653668685375 | 0.00317597 |
| *C16orf63* | 0.182637872457516 | 0.003178639 |
| *PPIAL4G* | 0.182591040147021 | 0.003186563 |
| *AAAS* | 0.182569978822202 | 0.003190133 |
| *PACSIN2* | 0.182567875134454 | 0.003190489 |
| *ARFRP1* | -0.1825670248 | 0.003190634 |
| *LSM6* | 0.18255822744373 | 0.003192126 |
| *PPRC1* | 0.182552719648257 | 0.003193061 |
| *MYEOV2* | -0.1825212621 | 0.003198403 |
| *JAKMIP3* | -0.1825113880 | 0.003200082 |
| *MYPN* | 0.182493693645496 | 0.003203092 |
| *VARS2* | 0.182453651888596 | 0.003209914 |
| *ARL4A* | 0.182449509341384 | 0.00321062 |
| *ELP2* | -0.1824082689 | 0.003217661 |
| *LOC146880* | 0.182397298693601 | 0.003219537 |
| *RNF25* | -0.1823865076 | 0.003221382 |
| *TMEM37* | -0.1823842078 | 0.003221776 |
| *CDADC1* | -0.1823187579 | 0.003232992 |
| *OSCP1* | -0.1822789494 | 0.003239831 |
| *RASA2* | 0.182270807414049 | 0.003241231 |
| *TPM4* | 0.182206104712113 | 0.003252379 |
| *EDNRA* | -0.1821797611 | 0.003256928 |
| *AGXT2L2* | -0.1821490830 | 0.003262233 |
| *KLK15* | 0.182075612790779 | 0.003274969 |
| *HPGD* | -0.1820666667 | 0.003276523 |
| *C12orf47* | -0.1819646410 | 0.003294291 |
| *LOC100170939* | 0.18194361449782 | 0.003297963 |
| *MAGIX* | -0.1819199014 | 0.00330211 |
| *TPM1* | -0.1819115639 | 0.003303569 |
| *STON2* | 0.181904990944454 | 0.003304719 |
| *TNFSF9* | 0.181873808074182 | 0.003310183 |
| *FLJ44054* | 0.181868515139011 | 0.003311111 |
| *ZNF195* | 0.181823266642796 | 0.003319056 |
| *CD1C* | -0.1818064396 | 0.003322015 |
| *HSD17B10* | 0.181799387855751 | 0.003323255 |
| *CCDC144B* | 0.181797975671847 | 0.003323504 |
| *INO80B* | -0.1817690342 | 0.003328601 |
| *FGF5* | 0.181746798683126 | 0.003332521 |
| *CAMKK2* | -0.1817371777 | 0.003334219 |
| *MOCOS* | 0.181662414868683 | 0.003347438 |
| *C1orf163* | 0.181649177436754 | 0.003349783 |
| *HCCS* | 0.181643798763079 | 0.003350737 |
| *SYCP2* | 0.181638517497685 | 0.003351673 |
| *DLL3* | 0.181638029832069 | 0.00335176 |
| *NDN* | -0.1816339420 | 0.003352485 |
| *C18orf10* | 0.181630398303207 | 0.003353113 |
| *C19orf44* | -0.1816244047 | 0.003354177 |
| *APOBEC1* | -0.1816101889 | 0.0033567 |
| *CNNM2* | -0.1815490490 | 0.003367573 |
| *PEX16* | -0.1815351738 | 0.003370045 |
| *GUCY1A3* | -0.1815311046 | 0.00337077 |
| *FMNL3* | 0.181530402200335 | 0.003370895 |
| *RALGAPB* | 0.18151661664056 | 0.003373353 |
| *VPS54* | 0.181498759472261 | 0.00337654 |
| *RBMX2* | -0.1814463151 | 0.003385914 |
| *USP16* | 0.181428100516163 | 0.003389175 |
| *TSPAN2* | -0.1814066198 | 0.003393025 |
| *KCTD18* | -0.1813815941 | 0.003397515 |
| *PLA2G6* | -0.1813766212 | 0.003398408 |
| *THOC6* | 0.181373327791383 | 0.003398999 |
| *ICAM5* | 0.181358760988977 | 0.003401616 |
| *PRDX2* | -0.1813542799 | 0.003402422 |
| *TUBB4* | 0.181352557918981 | 0.003402731 |
| *LRRN2* | -0.1813505942 | 0.003403085 |
| *ZNF22* | 0.181317001983629 | 0.003409129 |
| *ACAD8* | -0.1812961818 | 0.00341288 |
| *TCF21* | -0.1812823803 | 0.003415369 |
| *ASCC3* | 0.181244958483294 | 0.003422125 |
| *PTAR1* | 0.18120904328931 | 0.003428621 |
| *MEF2C* | -0.1811212490 | 0.003444546 |
| *CDK5RAP1* | 0.181117557248131 | 0.003445217 |
| *ANKRD27* | 0.18111299679953 | 0.003446046 |
| *CYP2B7P1* | -0.1811093992 | 0.0034467 |
| *KCNK15* | -0.1810310398 | 0.003460979 |
| *RNF2* | 0.181014214667642 | 0.003464052 |
| *AHCY* | 0.181010029748121 | 0.003464816 |
| *ZNF474* | 0.181001478416201 | 0.003466379 |
| *SPANXA2* | 0.180994366189033 | 0.00346768 |
| *GHR* | -0.1809536443 | 0.003475134 |
| *MSLNL* | -0.1809524177 | 0.003475359 |
| *SPRY4* | 0.180943046971794 | 0.003477076 |
| *TBC1D23* | 0.180928519669473 | 0.00347974 |
| *ARMC9* | -0.1809033268 | 0.003484365 |
| *NLRP14* | 0.180900855815065 | 0.003484819 |
| *GAGE1* | 0.18089090486953 | 0.003486647 |
| *SYT11* | -0.1808888242 | 0.00348703 |
| *C8orf38* | 0.18085643586561 | 0.003492987 |
| *ADAMTS10* | -0.1808391587 | 0.003496169 |
| *STMN4* | -0.1807997412 | 0.003503438 |
| *RGS9* | -0.1807921528 | 0.003504839 |
| *TRIM5* | -0.1807737655 | 0.003508236 |
| *IGFBP6* | -0.1807707339 | 0.003508796 |
| *KIAA0652* | -0.1807291179 | 0.003516496 |
| *CLRN3* | -0.1807203780 | 0.003518115 |
| *RNF112* | -0.1806876341 | 0.003524186 |
| *MDP1* | -0.1806685708 | 0.003527726 |
| *LARP1B* | 0.180651766742883 | 0.003530848 |
| *RAB39* | 0.180600432174456 | 0.003540402 |
| *MSRA* | -0.1805884991 | 0.003542626 |
| *CIZ1* | 0.180584261822224 | 0.003543417 |
| *C19orf33* | -0.1805783945 | 0.003544511 |
| *PDHA1* | 0.180547818502757 | 0.003550219 |
| *COX4I2* | -0.1805306558 | 0.003553426 |
| *HHIP* | 0.180488056884038 | 0.003561399 |
| *LCOR* | 0.180473542875946 | 0.003564119 |
| *LOC389634* | 0.180453847048509 | 0.003567813 |
| *S1PR1* | -0.1804300842 | 0.003572274 |
| *PDZRN4* | -0.1804209136 | 0.003573998 |
| *PTER* | 0.18042089092792 | 0.003574002 |
| *SFXN4* | -0.1804196257 | 0.00357424 |
| *COX5A* | 0.180402274063852 | 0.003577502 |
| *OR2B2* | 0.180388444290218 | 0.003580105 |
| *MAS1* | -0.1803832220 | 0.003581088 |
| *PLCB3* | -0.1803629993 | 0.003584897 |
| *ETFDH* | -0.1803202827 | 0.003592956 |
| *NOL8* | 0.18028832615494 | 0.003598995 |
| *SUCLG2* | -0.1802648541 | 0.003603437 |
| *PABPC1L2A* | 0.180200732103268 | 0.003615596 |
| *HSPG2* | -0.1801756383 | 0.003620365 |
| *SDHB* | 0.180144677782673 | 0.003626256 |
| *TMC4* | -0.1800944311 | 0.003635836 |
| *PPP1R3B* | -0.1800677005 | 0.003640941 |
| *ADCY6* | -0.1800049177 | 0.003652959 |
| *CHRM4* | 0.179962320799253 | 0.003661132 |
| *PDCD11* | 0.179915104889747 | 0.003670212 |
| *SH3BGRL2* | -0.1799147689 | 0.003670276 |
| *RPA4* | 0.179888482496768 | 0.00367534 |
| *NKX2-1* | 0.179872134988997 | 0.003678492 |
| *C10orf122* | 0.17983440899426 | 0.003685776 |
| *MYADML2* | 0.179787077613624 | 0.003694933 |
| *TP53INP1* | -0.1797771839 | 0.00369685 |
| *GTF2A2* | 0.179753099180757 | 0.00370152 |
| *FAF1* | 0.179739830286596 | 0.003704094 |
| *C1orf216* | -0.1797137605 | 0.003709158 |
| *INTS4L2* | 0.179688017350853 | 0.003714165 |
| *PLXNB1* | -0.1796218384 | 0.003727063 |
| *FLJ37201* | 0.179610295506036 | 0.003729317 |
| *CCNT1* | 0.179606348369888 | 0.003730088 |
| *NCRNA00115* | 0.179583898385361 | 0.003734475 |
| *SENP3* | 0.179565489480917 | 0.003738077 |
| *FAM153C* | 0.179553243415196 | 0.003740475 |
| *DUSP1* | -0.1795376117 | 0.003743537 |
| *HINT3* | -0.1795161733 | 0.003747741 |
| *ZW10* | 0.179502772601665 | 0.00375037 |
| *FAM9A* | 0.179456357825529 | 0.003759492 |
| *FAM124B* | -0.1793997086 | 0.003770652 |
| *EGFL6* | 0.179388331635762 | 0.003772897 |
| *CDAN1* | 0.179383801019134 | 0.003773791 |
| *PDLIM3* | -0.1792202435 | 0.003806205 |
| *HMG20A* | 0.179182652489347 | 0.00381369 |
| *RBBP5* | 0.179156338552013 | 0.003818938 |
| *LSM14A* | 0.179155474194004 | 0.00381911 |
| *C2orf42* | -0.1791299612 | 0.003824204 |
| *TBXA2R* | -0.1791285088 | 0.003824495 |
| *DTNB* | 0.179108348907363 | 0.003828525 |
| *C3orf55* | -0.1790907375 | 0.003832048 |
| *CHRNG* | 0.179087125971723 | 0.003832771 |
| *RPL23AP82* | -0.1790819757 | 0.003833802 |
| *SLC7A2* | -0.1790110689 | 0.003848025 |
| *ELP2P* | 0.178940886726897 | 0.003862149 |
| *ZNF74* | 0.178923470701805 | 0.003865662 |
| *CHSY3* | 0.178910991859435 | 0.00386818 |
| *C6orf89* | -0.1788327041 | 0.003884013 |
| *EXOC3* | -0.1788193993 | 0.00388671 |
| *HCG18* | 0.178801244682824 | 0.003890392 |
| *ZNF154* | -0.1787498302 | 0.003900837 |
| *TAF11* | 0.178704160846878 | 0.003910137 |
| *ROBO1* | 0.17868681359762 | 0.003913674 |
| *PAX6* | 0.17866597372629 | 0.003917928 |
| *SBK1* | 0.178660648067593 | 0.003919016 |
| *RPL31* | -0.1786562533 | 0.003919914 |
| *LMCD1* | -0.1786367780 | 0.003923894 |
| *CIAPIN1* | 0.178617843777485 | 0.003927768 |
| *EFCAB6* | -0.1785811767 | 0.003935279 |
| *FAM154B* | 0.178563553631333 | 0.003938894 |
| *5-Mar* | 0.178553622880541 | 0.003940932 |
| *CAPG* | 0.178551478831629 | 0.003941372 |
| *C6orf211* | 0.178536846891352 | 0.003944378 |
| *CDYL* | 0.17851368089369 | 0.00394914 |
| *BTBD16* | -0.1784910336 | 0.0039538 |
| *CLGN* | 0.178446151252715 | 0.003963051 |
| *FOXL2* | 0.178436735709451 | 0.003964994 |
| *CYP2E1* | -0.1784319431 | 0.003965984 |
| *TMEM47* | -0.1784130558 | 0.003969885 |
| *SCAMP1* | -0.1784052792 | 0.003971493 |
| *TCTA* | -0.1784020837 | 0.003972153 |
| *COL4A5* | -0.1783831140 | 0.003976077 |
| *TMEM175* | -0.1783693882 | 0.003978919 |
| *ROGDI* | -0.1783672144 | 0.003979369 |
| *HELQ* | -0.1783643384 | 0.003979965 |
| *DUSP8* | -0.1783604731 | 0.003980765 |
| *PLCD3* | -0.1783405771 | 0.003984889 |
| *HPSE* | 0.178340290808325 | 0.003984948 |
| *ZG16* | -0.1783245989 | 0.003988203 |
| *NCRNA00189* | 0.178285950232168 | 0.003996231 |
| *PPP1R1A* | -0.1782220528 | 0.004009535 |
| *PLOD3* | 0.17816561187501 | 0.004021319 |
| *R3HCC1* | -0.1781607466 | 0.004022337 |
| *LCA5L* | -0.1781360524 | 0.004027503 |
| *CP* | -0.1781342327 | 0.004027884 |
| *SLC9A7* | 0.17813343919916 | 0.004028051 |
| *YKT6* | 0.178131757994622 | 0.004028403 |
| *BCAR3* | 0.178119430826342 | 0.004030985 |
| *STK16* | -0.1780659446 | 0.004042205 |
| *RAB19* | 0.178059447043967 | 0.00404357 |
| *NDUFB8* | -0.1779454605 | 0.004067585 |
| *WDR72* | 0.17791558726417 | 0.0040739 |
| *PSMA5* | 0.177900796790226 | 0.004077029 |
| *PNPLA4* | -0.1778564406 | 0.004086429 |
| *TAS2R20* | -0.1778541008 | 0.004086925 |
| *UGT2B4* | 0.177854074773762 | 0.00408693 |
| *IRF2* | -0.1778257564 | 0.004092942 |
| *CD80* | 0.177824264708211 | 0.004093259 |
| *STAG1* | 0.177803221574986 | 0.004097732 |
| *MYH13* | 0.177751482959971 | 0.004108747 |
| *KDELR2* | 0.177738833423262 | 0.004111444 |
| *NEK1* | -0.1777345090 | 0.004112367 |
| *DENND1B* | 0.177718253336229 | 0.004115836 |
| *ERO1LB* | -0.1777159248 | 0.004116333 |
| *CPA4* | 0.177672673394137 | 0.004125578 |
| *TRIM44* | 0.177659250718074 | 0.004128451 |
| *NCRNA00171* | 0.177602745041548 | 0.004140564 |
| *ANKRD19* | -0.1775894493 | 0.004143419 |
| *GPRASP2* | -0.1775736999 | 0.004146803 |
| *NUDT22* | -0.1775147513 | 0.004159491 |
| *DSCAML1* | -0.1775133495 | 0.004159793 |
| *KLHL13* | -0.1774684339 | 0.004169485 |
| *KIAA1407* | -0.1774407502 | 0.004175469 |
| *ZDHHC14* | -0.1774149013 | 0.004181063 |
| *VENTXP1* | 0.177359361728419 | 0.004193106 |
| *LOC115110* | -0.1773388719 | 0.004197557 |
| *UTP11L* | 0.177320987178966 | 0.004201445 |
| *YIPF6* | 0.177318490273774 | 0.004201988 |
| *ZNF180* | 0.177310199673077 | 0.004203792 |
| *NR2E1* | 0.177289964437024 | 0.004208197 |
| *GRPEL1* | 0.177284829610255 | 0.004209316 |
| *KRT86* | 0.177238055375591 | 0.004219518 |
| *C8G* | -0.1772137092 | 0.004224836 |
| *RPL7A* | -0.1771638289 | 0.004235753 |
| *CTHRC1* | 0.17711051481383 | 0.004247448 |
| *ANGPTL1* | -0.1770914364 | 0.004251641 |
| *ABRA* | -0.1770899088 | 0.004251977 |
| *TP53INP2* | -0.1770839708 | 0.004253282 |
| *MTMR1* | 0.177075618018198 | 0.00425512 |
| *C6orf138* | -0.1770662193 | 0.004257188 |
| *RRAGA* | -0.1770302753 | 0.004265106 |
| *YTHDF1* | 0.176973474024171 | 0.004277645 |
| *FBXL3* | -0.1769712656 | 0.004278133 |
| *DSCR4* | 0.17695621437926 | 0.004281462 |
| *ZFHX4* | 0.176942859385959 | 0.004284418 |
| *FAR1* | 0.176937038382595 | 0.004285706 |
| *ZCCHC4* | 0.176871615201816 | 0.004300215 |
| *SLC39A5* | -0.1768654548 | 0.004301584 |
| *LOC100286844* | -0.1768552347 | 0.004303855 |
| *EIF4G1* | 0.176849897030677 | 0.004305041 |
| *CECR1* | -0.1768427345 | 0.004306634 |
| *PRSS50* | -0.1767861738 | 0.00431923 |
| *NSUN6* | 0.17678407786427 | 0.004319697 |
| *USP11* | 0.176780924035327 | 0.004320401 |
| *NCRNA00185* | -0.1767705114 | 0.004322724 |
| *COMMD8* | 0.176768972295529 | 0.004323067 |
| *ATHL1* | -0.1767688388 | 0.004323097 |
| *C16orf93* | 0.176758313939848 | 0.004325446 |
| *VPRBP* | 0.176739921456764 | 0.004329555 |
| *SMPD4* | 0.176736284610258 | 0.004330368 |
| *CCBP2* | -0.1767252413 | 0.004332836 |
| *TTF1* | 0.176707804231899 | 0.004336737 |
| *MTA3* | -0.1766412363 | 0.004351659 |
| *C22orf40* | -0.1765354922 | 0.004375457 |
| *MRPL9* | 0.176507615145841 | 0.00438175 |
| *BLVRB* | -0.1765039226 | 0.004382584 |
| *IMMP1L* | 0.176446851489015 | 0.004395496 |
| *ACP6* | -0.1764355625 | 0.004398054 |
| *NAP1L5* | -0.1764227183 | 0.004400966 |
| *PTEN* | -0.1763878237 | 0.004408886 |
| *IGSF11* | 0.176352451715321 | 0.004416927 |
| *OSR2* | -0.1762718731 | 0.004435296 |
| *C19orf18* | -0.1762558538 | 0.004438956 |
| *SNRNP35* | -0.1762443451 | 0.004441587 |
| *LPCAT1* | 0.176241268864847 | 0.00444229 |
| *SLC16A8* | -0.1762375378 | 0.004443144 |
| *DDX49* | 0.176234286405591 | 0.004443888 |
| *PDCL* | 0.176208313324327 | 0.004449833 |
| *RYR3* | -0.1761945567 | 0.004452985 |
| *MAGEC1* | 0.176177976795363 | 0.004456787 |
| *AUTS2* | 0.176166741772445 | 0.004459365 |
| *PHF21A* | -0.1761587015 | 0.00446121 |
| *NFATC4* | -0.1761479229 | 0.004463686 |
| *TNXB* | -0.1761021625 | 0.004474208 |
| *EXOG* | 0.176088139037091 | 0.004477437 |
| *RPS4Y1* | -0.1760752447 | 0.004480408 |
| *LRRC27* | -0.1760529284 | 0.004485554 |
| *GTF3C2* | 0.176028862660838 | 0.004491109 |
| *WBSCR16* | -0.1760235283 | 0.004492342 |
| *VTA1* | 0.175994966791887 | 0.004498944 |
| *ZIC1* | 0.175954913444289 | 0.004508219 |
| *UBE2F* | -0.1759494020 | 0.004509496 |
| *CHURC1* | -0.1758192104 | 0.004539769 |
| *COG2* | -0.1758119139 | 0.004541471 |
| *SLC35F1* | -0.1757995262 | 0.004544361 |
| *ZNF580* | -0.1757796461 | 0.004549004 |
| *SPR* | -0.1757689940 | 0.004551494 |
| *BTN2A3* | 0.175765993917247 | 0.004552195 |
| *EIF4G3* | 0.175709098468236 | 0.004565515 |
| *PLAUR* | 0.175701667438549 | 0.004567257 |
| *C21orf62* | -0.1756684468 | 0.004575053 |
| *FAM151B* | 0.175657829626748 | 0.004577547 |
| *GJA3* | 0.175654712615781 | 0.00457828 |
| *B3GNT4* | 0.175651309047847 | 0.00457908 |
| *PPIC* | -0.1756509493 | 0.004579164 |
| *LRRK2* | -0.1756390092 | 0.004581971 |
| *DDX53* | 0.175620538954923 | 0.004586317 |
| *UBE2D3* | -0.1756062882 | 0.004589672 |
| *AWAT2* | 0.175540755417593 | 0.004605131 |
| *C6orf192* | -0.1755365951 | 0.004606114 |
| *LRRCC1* | 0.175525522276306 | 0.004608731 |
| *PCP4* | -0.1754965108 | 0.004615594 |
| *SNAI3* | -0.1754762547 | 0.004620391 |
| *NUP54* | 0.175452060113711 | 0.004626127 |
| *TRIM29* | -0.1754507287 | 0.004626443 |
| *PLCXD2* | 0.175362069007471 | 0.004647519 |
| *NRN1* | 0.175311153959332 | 0.004659661 |
| *KIAA1324L* | -0.1752896512 | 0.004664798 |
| *ADAD2* | -0.1752738056 | 0.004668586 |
| *DUS4L* | 0.175272572006236 | 0.004668881 |
| *SULT1A2* | -0.1752674679 | 0.004670102 |
| *CDYL2* | 0.175255176520946 | 0.004673044 |
| *SLC7A6OS* | 0.175222570282827 | 0.004680855 |
| *SETMAR* | -0.1752165527 | 0.004682298 |
| *CRCP* | 0.175183227725923 | 0.004690295 |
| *NOTO* | 0.17517295836982 | 0.004692762 |
| *SLC10A7* | 0.175162576671507 | 0.004695257 |
| *CUL4A* | 0.175084262120764 | 0.004714118 |
| *BCOR* | 0.175076378697396 | 0.004716021 |
| *HYI* | -0.1750666226 | 0.004718376 |
| *BCDIN3D* | -0.1750626558 | 0.004719334 |
| *USP53* | -0.1750611007 | 0.00471971 |
| *LRRC8D* | 0.175055568764552 | 0.004721046 |
| *ACIN1* | 0.175035222938365 | 0.004725964 |
| *MYH15* | 0.175000508119759 | 0.004734365 |
| *OSTalpha* | -0.1749960190 | 0.004735452 |
| *MTA1* | 0.174955253114808 | 0.004745337 |
| *ZNF77* | 0.17495146539687 | 0.004746257 |
| *PTPRK* | 0.174856296963577 | 0.00476941 |
| *SLMAP* | -0.1748273973 | 0.00477646 |
| *C9orf129* | 0.17479759500139 | 0.004783741 |
| *LOC440354* | 0.174797238929592 | 0.004783828 |
| *PNN* | 0.174789679131646 | 0.004785677 |
| *KIAA0754* | 0.174767160875865 | 0.004791187 |
| *EPHB3* | 0.174764632341846 | 0.004791806 |
| *RPUSD1* | 0.174731886177174 | 0.00479983 |
| *USP28* | 0.17472228171629 | 0.004802185 |
| *NSMAF* | 0.174717050547917 | 0.004803469 |
| *PGS1* | 0.174677452037079 | 0.004813195 |
| *PITX3* | 0.174655092671794 | 0.004818694 |
| *ALX3* | 0.174629518194182 | 0.004824991 |
| *ADAMTS12* | 0.174579943016345 | 0.004837219 |
| *DYRK4* | -0.1745698374 | 0.004839715 |
| *TCP10L* | -0.1745072825 | 0.004855191 |
| *FOXN2* | 0.174439665157953 | 0.00487197 |
| *SMG7* | 0.174434184498976 | 0.004873332 |
| *LPHN3* | -0.1744254547 | 0.004875503 |
| *PGBD3* | -0.1744109411 | 0.004879113 |
| *CACNA1C* | -0.1743699568 | 0.004889322 |
| *LIMA1* | 0.174361207067174 | 0.004891504 |
| *GIPC3* | -0.1743560655 | 0.004892786 |
| *FUT9* | -0.1743429002 | 0.004896072 |
| *COL27A1* | 0.174324834572833 | 0.004900584 |
| *FOSL1* | 0.174275874325528 | 0.00491283 |
| *TRIM21* | -0.1742530679 | 0.004918543 |
| *C7orf28B* | 0.174243862998284 | 0.004920851 |
| *XAGE2* | 0.174241444552786 | 0.004921458 |
| *POTEH* | 0.174240947184223 | 0.004921582 |
| *SEPT8* | 0.174220919608579 | 0.004926608 |
| *DYSF* | -0.1742208291 | 0.00492663 |
| *MECP2* | -0.1742054451 | 0.004930494 |
| *ODZ2* | 0.174197979527647 | 0.004932369 |
| *RPL23A* | -0.1741737842 | 0.004938453 |
| *RCAN3* | 0.174158872689954 | 0.004942206 |
| *PLK2* | 0.174154612124566 | 0.004943278 |
| *SULT1C4* | -0.1741209227 | 0.004951768 |
| *SEC61G* | 0.174086108519318 | 0.004960554 |
| *MOCS1* | -0.1740856517 | 0.00496067 |
| *OR2M3* | 0.174048616267933 | 0.004970032 |
| *TC2N* | -0.1740229477 | 0.004976531 |
| *C11orf59* | -0.1740160624 | 0.004978275 |
| *PCP4L1* | -0.1740034394 | 0.004981475 |
| *ITGA7* | -0.1739859554 | 0.00498591 |
| *FMNL2* | 0.173949909697753 | 0.004995064 |
| *IGSF21* | -0.1739486171 | 0.004995392 |
| *CT45A3* | 0.173933195361292 | 0.004999314 |
| *OPLAH* | -0.1739168429 | 0.005003475 |
| *ZNF45* | 0.173865345859676 | 0.005016599 |
| *PRCP* | -0.1737851135 | 0.005037108 |
| *C1orf180* | 0.173778159216968 | 0.005038889 |
| *NXT1* | 0.173765687299042 | 0.005042085 |
| *HOMER2* | 0.173756753388794 | 0.005044375 |
| *NADSYN1* | -0.1737532081 | 0.005045284 |
| *AGBL2* | -0.1737402372 | 0.005048612 |
| *PSORS1C1* | -0.1737255751 | 0.005052375 |
| *RAC3* | 0.173711616709788 | 0.005055961 |
| *FOXA1* | 0.173694549902672 | 0.005060348 |
| *GIMAP7* | -0.1736927699 | 0.005060806 |
| *FAM57B* | 0.173633328647267 | 0.005076113 |
| *CALHM2* | -0.1736315795 | 0.005076564 |
| *EFHA2* | -0.1735895115 | 0.005087423 |
| *LEPRE1* | 0.173559394968554 | 0.00509521 |
| *NPW* | 0.173520007632549 | 0.005105411 |
| *GSTM5* | -0.1734793502 | 0.005115959 |
| *GDF3* | -0.1734730094 | 0.005117606 |
| *PDS5B* | 0.173471137260477 | 0.005118092 |
| *SCFD2* | 0.173450381735731 | 0.005123487 |
| *WFIKKN2* | -0.1734464828 | 0.005124501 |
| *DNAJC24* | -0.1733850550 | 0.005140499 |
| *SLC17A8* | 0.173373171409288 | 0.005143599 |
| *MBNL3* | 0.17333177160943 | 0.005154413 |
| *FABP1* | -0.1733235766 | 0.005156556 |
| *SNCB* | 0.173272571762488 | 0.005169911 |
| *GTF2IRD1* | 0.173265909682404 | 0.005171658 |
| *SYNJ2* | 0.173256658641239 | 0.005174084 |
| *KIAA1429* | 0.17324661979274 | 0.005176718 |
| *TET1* | 0.17323377159922 | 0.005180091 |
| *PC* | 0.173181306751519 | 0.005193886 |
| *RBM17* | 0.173159973827108 | 0.005199504 |
| *CEBPZ* | 0.173150565893174 | 0.005201984 |
| *FBXO32* | -0.1731295531 | 0.005207525 |
| *DPY19L2P2* | 0.173125556798095 | 0.00520858 |
| *PPP1R9B* | 0.173114581621776 | 0.005211477 |
| *MGAT4B* | 0.173093289432561 | 0.005217102 |
| *FOXJ3* | 0.173091162358592 | 0.005217664 |
| *NXF4* | 0.173080902858314 | 0.005220376 |
| *SLC25A46* | 0.173079328613181 | 0.005220793 |
| *HBA2* | -0.1730727875 | 0.005222523 |
| *C10orf107* | -0.1730557354 | 0.005227036 |
| *TRAPPC9* | -0.1730380554 | 0.005231718 |
| *CBFA2T3* | -0.1730362884 | 0.005232186 |
| *HSD17B1* | -0.1730335839 | 0.005232903 |
| *HCN3* | 0.173024491212481 | 0.005235313 |
| *ELOVL3* | 0.173007878123168 | 0.00523972 |
| *BDP1* | 0.172985535496482 | 0.005245651 |
| *SIAE* | -0.1729781915 | 0.005247601 |
| *HMGA1* | 0.172973707868374 | 0.005248793 |
| *CHIC2* | 0.17296960573382 | 0.005249883 |
| *PLXNB3* | -0.1729353017 | 0.005259008 |
| *RGS22* | -0.1729172829 | 0.005263806 |
| *AQP2* | -0.1729128491 | 0.005264988 |
| *C18orf62* | 0.172906671458961 | 0.005266634 |
| *TNNI1* | 0.172870957064119 | 0.005276161 |
| *GM2A* | -0.1728507179 | 0.005281567 |
| *SLC29A3* | -0.1728326772 | 0.00528639 |
| *ATP9B* | -0.1728176268 | 0.005290417 |
| *POLR1A* | 0.17281391376746 | 0.005291411 |
| *DAPK3* | -0.1727720577 | 0.005302625 |
| *SLC10A1* | 0.172747783855265 | 0.005309138 |
| *ACTR3* | 0.172719985331775 | 0.005316607 |
| *NXF2* | 0.172680325179649 | 0.005327277 |
| *BTNL3* | -0.1726464323 | 0.005336412 |
| *C13orf29* | 0.172623544315068 | 0.005342588 |
| *BAG5* | 0.172615946787863 | 0.00534464 |
| *UBAC2* | -0.1725988371 | 0.005349263 |
| *FZD7* | -0.1725934365 | 0.005350723 |
| *TMEM126B* | -0.1725871976 | 0.00535241 |
| *C1orf161* | 0.172572880363807 | 0.005356283 |
| *NGF* | -0.1725666874 | 0.005357959 |
| *NOP56* | 0.172563106001058 | 0.005358929 |
| *SMN1* | 0.17256195560497 | 0.00535924 |
| *DOCK4* | 0.172561248255984 | 0.005359432 |
| *WASF2* | 0.172557690250742 | 0.005360395 |
| *VWCE* | -0.1725527384 | 0.005361737 |
| *CHRND* | 0.172547725289926 | 0.005363095 |
| *FAM73B* | -0.1725308004 | 0.005367682 |
| *TTC37* | 0.172512876778761 | 0.005372544 |
| *NADK* | 0.1725052686 | 0.005374608 |
| *TMTC2* | 0.172482760829964 | 0.005380721 |
| *TXNDC11* | -0.1724758354 | 0.005382603 |
| *PTPRR* | 0.172463195025872 | 0.00538604 |
| *KPNA6* | 0.17244014214216 | 0.005392313 |
| *FAM27C* | -0.1723802494 | 0.005408641 |
| *INTS8* | 0.172357677305747 | 0.005414806 |
| *ZNF644* | 0.172338104009822 | 0.005420157 |
| *ABHD6* | -0.1723025208 | 0.005429898 |
| *OR52N4* | -0.1722965662 | 0.005431529 |
| *BTF3L4* | 0.172282531681346 | 0.005435376 |
| *EEF2* | -0.1722797674 | 0.005436134 |
| *MUC17* | -0.1722787923 | 0.005436402 |
| *POLI* | -0.1722729294 | 0.00543801 |
| *TMEM107* | 0.172270732609054 | 0.005438613 |
| *FBXO22* | 0.172253644405052 | 0.005443303 |
| *NAP1L3* | -0.1722290664 | 0.005450055 |
| *TXNDC5* | 0.172226597870426 | 0.005450733 |
| *RPL12* | -0.1721641874 | 0.005467914 |
| *LOC145783* | 0.17212961815241 | 0.005477451 |
| *LMO2* | -0.1721052346 | 0.005484187 |
| *LOC652276* | 0.17208410189897 | 0.005490031 |
| *RLBP1* | 0.172031631762806 | 0.005504566 |
| *FAF2* | 0.17202206824203 | 0.005507219 |
| *CCRL1* | -0.1720063271 | 0.005511588 |
| *SYNE1* | -0.1719666087 | 0.005522626 |
| *CASZ1* | -0.1719518115 | 0.005526743 |
| *C3orf33* | -0.1719454350 | 0.005528518 |
| *APOBEC3C* | -0.1719398370 | 0.005530077 |
| *TAB1* | -0.1718926927 | 0.00554322 |
| *RBM42* | 0.171859554238733 | 0.005552475 |
| *HPD* | -0.1717990078 | 0.005569421 |
| *ADH1A* | -0.1717911503 | 0.005571623 |
| *TAP2* | 0.171720238138787 | 0.005591536 |
| *ATP6V0A2* | 0.171654655494968 | 0.005610009 |
| *C2orf16* | -0.1716544979 | 0.005610054 |
| *CPD* | 0.171651123476815 | 0.005611006 |
| *BMPR2* | -0.1716424288 | 0.005613459 |
| *BBC3* | -0.1716293476 | 0.005617152 |
| *C19orf41* | 0.171628770594391 | 0.005617315 |
| *MTERFD2* | -0.1716146850 | 0.005621295 |
| *C3orf72* | 0.17161073557368 | 0.005622411 |
| *DGCR8* | 0.171605266112875 | 0.005623957 |
| *DUSP13* | 0.17160124332385 | 0.005625095 |
| *DCTN1* | -0.1715864238 | 0.005629287 |
| *WBP5* | 0.171549462297013 | 0.005639754 |
| *HSP90AB2P* | 0.171518854884427 | 0.005648435 |
| *ANP32A* | 0.17148473756382 | 0.005658126 |
| *TMEM170A* | 0.171477847148424 | 0.005660085 |
| *C3orf57* | 0.171477724122799 | 0.00566012 |
| *HMGCL* | -0.1714755978 | 0.005660725 |
| *CECR6* | 0.171446414534123 | 0.005669029 |
| *PDZK1* | 0.171446338800298 | 0.005669051 |
| *SRP72* | 0.171428765309204 | 0.005674057 |
| *DYDC2* | 0.171363304240331 | 0.00569274 |
| *RAB17* | -0.1713076980 | 0.005708653 |
| *HESX1* | 0.171307388365378 | 0.005708742 |
| *POLR3C* | 0.171303136980383 | 0.00570996 |
| *CALB2* | -0.1712982573 | 0.005711359 |
| *PHRF1* | 0.171296542762822 | 0.00571185 |
| *HOXB5* | -0.1712922761 | 0.005713074 |
| *SYP* | -0.1712909797 | 0.005713445 |
| *C4orf52* | -0.1712831655 | 0.005715686 |
| *SLC35E1* | 0.171278810846428 | 0.005716936 |
| *UCN* | -0.1712636967 | 0.005721274 |
| *LOXL1* | 0.17124085415885 | 0.005727835 |
| *SEC22B* | 0.171239407053491 | 0.005728251 |
| *C15orf59* | -0.1712346535 | 0.005729618 |
| *NHEG1* | 0.171208736875109 | 0.005737072 |
| *NCRNA00052* | 0.171204457220102 | 0.005738304 |
| *SLC2A14* | 0.171167334863936 | 0.005749 |
| *CNPY4* | -0.1711378378 | 0.005757511 |
| *LOC283050* | -0.1711372666 | 0.005757676 |
| *C16orf13* | -0.1711366669 | 0.005757849 |
| *BCKDK* | -0.1710543887 | 0.005781651 |
| *GPX6* | 0.171021122231038 | 0.005791299 |
| *PMS2L1* | 0.171002015812361 | 0.005796848 |
| *SPG20* | -0.1709909584 | 0.005800061 |
| *ARFIP1* | -0.1709820962 | 0.005802637 |
| *RILP* | -0.1709672986 | 0.005806941 |
| *SCNN1A* | -0.1709624261 | 0.005808359 |
| *CDC42EP5* | -0.1709494931 | 0.005812124 |
| *SH3KBP1* | 0.170943400964124 | 0.005813898 |
| *CASP9* | 0.170932259635212 | 0.005817144 |
| *NIPA1* | 0.170931572650255 | 0.005817344 |
| *MPL* | -0.1709047142 | 0.005825176 |
| *MAP7D2* | 0.170897517258999 | 0.005827276 |
| *CDK6* | 0.170803517464703 | 0.00585477 |
| *AAMP* | -0.1707822497 | 0.005861006 |
| *COQ10B* | -0.1707613234 | 0.005867149 |
| *MAGEB3* | 0.17075491176626 | 0.005869032 |
| *NCRNA00093* | -0.1707503014 | 0.005870386 |
| *ADAMTS13* | -0.1707026840 | 0.005884391 |
| *MKI67IP* | 0.170701526283503 | 0.005884732 |
| *OR2S2* | 0.170686757526337 | 0.005889082 |
| *LAPTM4A* | -0.1706784266 | 0.005891537 |
| *DCTPP1* | 0.170654164670507 | 0.005898693 |
| *COPS5* | 0.170653387381847 | 0.005898922 |
| *MEN1* | 0.170622350085773 | 0.005908087 |
| *BCL2A1* | 0.170622145890867 | 0.005908147 |
| *C15orf27* | 0.170614542897333 | 0.005910394 |
| *SETDB1* | 0.17060376682633 | 0.005913581 |
| *CBARA1* | -0.1705925648 | 0.005916894 |
| *C8orf48* | 0.1705821927024 | 0.005919964 |
| *COL4A3BP* | -0.1705701773 | 0.005923522 |
| *GAGE2A* | 0.170537413710707 | 0.005933233 |
| *NCRNA00161* | 0.170522171573654 | 0.005937756 |
| *LOC168474* | 0.170507397990991 | 0.005942142 |
| *MTNR1A* | 0.170494766952957 | 0.005945895 |
| *HSD11B1* | -0.1704795387 | 0.005950422 |
| *RPL8* | -0.1704515785 | 0.005958743 |
| *NBR2* | -0.1704514717 | 0.005958774 |
| *AGPAT5* | 0.170446473206891 | 0.005960263 |
| *GRAMD1B* | 0.170443354673811 | 0.005961192 |
| *URGCP* | -0.1704425817 | 0.005961422 |
| *FOXO4* | -0.1704339289 | 0.005964 |
| *TBKBP1* | -0.1703782361 | 0.005980617 |
| *SPRED1* | 0.170374203294153 | 0.005981822 |
| *ADAM33* | -0.1703732435 | 0.005982109 |
| *OR1L8* | -0.1703569406 | 0.005986982 |
| *LACTB2* | 0.170339457863896 | 0.005992212 |
| *GPR150* | 0.170331891842986 | 0.005994476 |
| *SNX17* | -0.1703289128 | 0.005995368 |
| *C17orf103* | -0.1702860167 | 0.006008224 |
| *MYO1B* | 0.170258856637065 | 0.006016376 |
| *KIAA0649* | -0.1702458363 | 0.006020288 |
| *F8A1* | 0.170240812347245 | 0.006021798 |
| *PEX12* | -0.1702383230 | 0.006022546 |
| *H2BFXP* | 0.170225505180896 | 0.006026401 |
| *NF2* | 0.170164254030163 | 0.00604485 |
| *LOC100270710* | -0.1701471154 | 0.006050021 |
| *RHCE* | 0.17014202243097 | 0.006051558 |
| *DIRAS1* | -0.1701100470 | 0.006061219 |
| *RPGR* | 0.170107542312826 | 0.006061976 |
| *BACH2* | 0.170089428410451 | 0.006067456 |
| *HYOU1* | 0.170088383325399 | 0.006067772 |
| *LOC440944* | 0.170017019659002 | 0.006089404 |
| *TOM1* | -0.1700005033 | 0.00609442 |
| *LOC158696* | -0.1699880884 | 0.006098193 |
| *CITED4* | -0.1699861212 | 0.006098791 |
| *PVRL4* | 0.16994434854998 | 0.006111503 |
| *MAP3K8* | -0.1699363184 | 0.006113949 |
| *C10orf67* | 0.169927479080519 | 0.006116643 |
| *OSR1* | -0.1699207295 | 0.006118701 |
| *IQCF2* | 0.169919173947974 | 0.006119175 |
| *HFE* | -0.1699102955 | 0.006121883 |
| *CTDSPL* | -0.1699046721 | 0.006123599 |
| *PMCH* | 0.169885675940427 | 0.006129398 |
| *LOC100129387* | 0.169826478463134 | 0.0061475 |
| *MCF2L2* | 0.16981350446789 | 0.006151473 |
| *LRRC10B* | -0.1698096909 | 0.006152642 |
| *NPIPL3* | -0.1697747270 | 0.006163364 |
| *ASTN1* | -0.1697644933 | 0.006166506 |
| *C10orf128* | -0.1697471628 | 0.006171829 |
| *APCDD1L* | 0.169745131267655 | 0.006172453 |
| *GAGE2B* | 0.169720861074306 | 0.006179916 |
| *B3GALNT2* | -0.1697125550 | 0.006182471 |
| *KLHL33* | -0.1696737135 | 0.006194435 |
| *CCHCR1* | 0.169644599591275 | 0.006203417 |
| *HOXB4* | -0.1695726563 | 0.006225661 |
| *NDUFB5* | -0.1695508975 | 0.006232402 |
| *SMAGP* | 0.169519491522814 | 0.006242144 |
| *GZF1* | 0.169500425831052 | 0.006248065 |
| *POU6F2* | 0.169488124198712 | 0.006251888 |
| *MYLK3* | -0.1694615719 | 0.006260146 |
| *ZBTB12* | 0.169450331202592 | 0.006263645 |
| *CEBPB* | -0.1694298796 | 0.006270016 |
| *NFE2L2* | -0.1694271777 | 0.006270858 |
| *C2orf15* | -0.1694159543 | 0.006274357 |
| *AKAP4* | -0.1693988717 | 0.006279687 |
| *SH3YL1* | -0.1693927658 | 0.006281592 |
| *EFNB2* | 0.16937233983637 | 0.006287972 |
| *GOLIM4* | 0.169370140748078 | 0.006288659 |
| *RPS15AP10* | 0.169283716102251 | 0.006315717 |
| *LEPROTL1* | -0.1692716681 | 0.006319497 |
| *TCN2* | -0.1692646950 | 0.006321686 |
| *CUZD1* | 0.169245911739012 | 0.006327586 |
| *INTS5* | -0.1692313459 | 0.006332164 |
| *EXTL1* | -0.1692260017 | 0.006333844 |
| *IPO7* | 0.169223194558027 | 0.006334727 |
| *RGS7BP* | -0.1692046246 | 0.00634057 |
| *HNRNPUL2* | 0.169204007117072 | 0.006340765 |
| *BAAT* | 0.169197787766402 | 0.006342723 |
| *TICAM2* | 0.169177400058693 | 0.006349146 |
| *BEST3* | 0.169152621232081 | 0.006356959 |
| *OR8K1* | -0.1691460855 | 0.006359022 |
| *KCTD11* | -0.1691107142 | 0.006370194 |
| *TIE1* | -0.1690991270 | 0.006373858 |
| *GAR1* | 0.169051457688172 | 0.00638895 |
| *PRPF38A* | 0.169027938303185 | 0.006396408 |
| *SLCO2A1* | -0.1690143587 | 0.006400718 |
| *CLK4* | -0.1690142426 | 0.006400755 |
| *MRPS10* | 0.169002439345486 | 0.006404503 |
| *RPSAP52* | 0.168947486223186 | 0.006421979 |
| *MAGED4B* | 0.168945963600911 | 0.006422463 |
| *MGST3* | -0.1689325406 | 0.006426739 |
| *TRAF3IP2* | -0.1689261642 | 0.006428771 |
| *PIGO* | 0.16892430162187 | 0.006429364 |
| *SDHAF2* | -0.1689224234 | 0.006429963 |
| *HIST1H4F* | 0.168911245100303 | 0.006433527 |
| *ZNF582* | -0.1689101821 | 0.006433866 |
| *GDEP* | -0.1688903099 | 0.006440207 |
| *TMEM25* | -0.1688676589 | 0.006447441 |
| *FSTL5* | 0.168854236719831 | 0.006451731 |
| *NGEF* | 0.168827850254515 | 0.006460172 |
| *KLF1* | 0.168808975023083 | 0.006466217 |
| *MAPK8IP1* | -0.1687876277 | 0.006473059 |
| *MGC4473* | 0.168765142317912 | 0.006480273 |
| *ASB12* | -0.1687577140 | 0.006482657 |
| *RSPH9* | -0.1687462608 | 0.006486336 |
| *KIAA0284* | 0.168730305685323 | 0.006491463 |
| *ARSE* | 0.168724809515642 | 0.006493231 |
| *FAM48B2* | -0.1687181406 | 0.006495375 |
| *TMEM41B* | 0.168700109822263 | 0.006501177 |
| *C14orf128* | -0.1686986444 | 0.006501649 |
| *RAPGEF6* | 0.16868491688405 | 0.00650607 |
| *NEK5* | -0.1686588680 | 0.006514466 |
| *HERPUD1* | -0.1686003578 | 0.00653336 |
| *S1PR4* | -0.1685594772 | 0.00654659 |
| *HTR3E* | 0.168515478261564 | 0.006560856 |
| *FOXD2* | 0.168506443350202 | 0.006563789 |
| *KCNK10* | 0.16846642580395 | 0.006576793 |
| *KCNJ10* | 0.168446517037085 | 0.006583272 |
| *SNORA49* | 0.16844283093978 | 0.006584472 |
| *ZDHHC15* | -0.1684062097 | 0.006596405 |
| *GSTK1* | -0.1683995322 | 0.006598583 |
| *ATG12* | 0.168398462606067 | 0.006598932 |
| *LOC441455* | -0.1683787801 | 0.006605356 |
| *SYTL5* | 0.168373210556797 | 0.006607175 |
| *SF3A2* | 0.168321599697683 | 0.00662405 |
| *CPNE5* | -0.1682971169 | 0.006632069 |
| *KRTAP5-9* | -0.1682933261 | 0.006633311 |
| *TM7SF4* | 0.168292314318576 | 0.006633643 |
| *CRAT* | -0.1682886040 | 0.006634859 |
| *NKX3-2* | 0.168281903388202 | 0.006637056 |
| *ARID3C* | 0.168232537885188 | 0.006653262 |
| *TTC17* | 0.168223353426406 | 0.006656281 |
| *RPS23* | -0.1682218637 | 0.00665677 |
| *C17orf97* | -0.1682189178 | 0.006657739 |
| *C10orf90* | 0.168209094924008 | 0.00666097 |
| *LCE3A* | 0.168184560896202 | 0.006669045 |
| *UGT2B10* | 0.168158086761427 | 0.006677769 |
| *C12orf34* | 0.168156817618253 | 0.006678188 |
| *MGLL* | -0.1681565218 | 0.006678285 |
| *MANBAL* | -0.1681091152 | 0.006693934 |
| *ZNF484* | 0.168048956960419 | 0.006713838 |
| *NRG2* | -0.1680156331 | 0.006724887 |
| *CUTC* | -0.1679792600 | 0.006736965 |
| *STK32A* | -0.1679722103 | 0.006739308 |
| *C20orf96* | -0.1679715374 | 0.006739532 |
| *YLPM1* | 0.167931276289095 | 0.006752928 |
| *OR6W1P* | 0.167914063214418 | 0.006758663 |
| *RP9* | 0.167868219543288 | 0.006773957 |
| *DNPEP* | -0.1678572300 | 0.006777628 |
| *KDM4D* | 0.167845916415845 | 0.006781409 |
| *TMEM136* | -0.1678339033 | 0.006785426 |
| *SPRED2* | 0.167777649223948 | 0.006804264 |
| *SERINC5* | 0.167773137323921 | 0.006805777 |
| *SNHG3-RCC1* | 0.167772211434476 | 0.006806088 |
| *ZPBP2* | 0.167747859227416 | 0.006814259 |
| *MAP3K10* | 0.167742155937487 | 0.006816174 |
| *SHISA7* | 0.167718983800978 | 0.00682396 |
| *UNKL* | -0.1677177101 | 0.006824388 |
| *SETD2* | 0.167712708323141 | 0.00682607 |
| *CACNB4* | -0.1676811728 | 0.006836681 |
| *ANP32C* | 0.167680037967474 | 0.006837063 |
| *TINAG* | 0.167671772072834 | 0.006839847 |
| *BOLL* | 0.167623497400883 | 0.006856126 |
| *SLC26A3* | -0.1676231308 | 0.00685625 |
| *PTPN14* | 0.167606959440963 | 0.006861711 |
| *ZFP36L2* | -0.1675996153 | 0.006864192 |
| *ZNF684* | 0.167531953949717 | 0.006887091 |
| *LENG9* | -0.1675308463 | 0.006887467 |
| *PSAP* | -0.1675051825 | 0.00689617 |
| *GOLGA4* | 0.167487856918397 | 0.006902052 |
| *IL1RL2* | 0.167487031368172 | 0.006902332 |
| *SCG5* | -0.1674833699 | 0.006903576 |
| *PROC* | 0.167472672864361 | 0.00690721 |
| *ZSCAN5B* | 0.167461842596183 | 0.006910891 |
| *JPH4* | -0.1674224610 | 0.006924292 |
| *RGS14* | -0.1673936818 | 0.006934099 |
| *PSME3* | 0.167393582378435 | 0.006934133 |
| *GJB3* | 0.167384327563226 | 0.00693729 |
| *KCNJ8* | -0.1673759453 | 0.00694015 |
| *FARP2* | -0.1673755842 | 0.006940273 |
| *EVPL* | -0.1673706946 | 0.006941942 |
| *TIPRL* | 0.167365265789843 | 0.006943795 |
| *FAM82A1* | -0.1673380198 | 0.006953103 |
| *IL23A* | 0.167290852974111 | 0.006969243 |
| *PVRL1* | 0.167289749916489 | 0.006969621 |
| *PROCR* | -0.1672766860 | 0.006974098 |
| *C18orf55* | 0.167252642136189 | 0.006982343 |
| *KIAA1737* | -0.1672373230 | 0.006987601 |
| *SUN3* | 0.167234389357016 | 0.006988609 |
| *EPB49* | -0.1671857664 | 0.007005323 |
| *CSAD* | -0.1671626931 | 0.007013268 |
| *FAM132A* | -0.1671571186 | 0.007015188 |
| *PDCD7* | 0.167108857425744 | 0.007031835 |
| *UTY* | -0.1670937112 | 0.007037066 |
| *ACADSB* | -0.1670917732 | 0.007037736 |
| *C13orf26* | -0.1670891780 | 0.007038633 |
| *PLEKHG4B* | 0.16704115840811 | 0.007055245 |
| *AKR1C1* | -0.1670332415 | 0.007057987 |
| *KRI1* | 0.167030345202483 | 0.007058991 |
| *TSPAN17* | 0.166968328907003 | 0.007080507 |
| *C4orf41* | -0.1669431802 | 0.00708925 |
| *SNX12* | 0.166930496158168 | 0.007093662 |
| *C22orf26* | -0.1668480216 | 0.007122415 |
| *ZFP91* | 0.166840637890792 | 0.007124994 |
| *ALPI* | -0.1668363707 | 0.007126485 |
| *RARG* | -0.1668130567 | 0.007134636 |
| *ZSWIM1* | -0.1668104198 | 0.007135559 |
| *PTDSS1* | 0.16679914427365 | 0.007139504 |
| *LOC653653* | 0.166797872247634 | 0.00713995 |
| *PRMT5* | 0.166782520141436 | 0.007145325 |
| *HSBP1* | 0.166778192133352 | 0.007146841 |
| *PKP4* | 0.166773539692226 | 0.007148471 |
| *GPR85* | 0.166759072031495 | 0.007153542 |
| *THAP6* | -0.1667563247 | 0.007154505 |
| *BCAN* | -0.1667328703 | 0.007162734 |
| *BCL7C* | -0.1667091225 | 0.007171075 |
| *C12orf41* | 0.166708626314671 | 0.007171249 |
| *SLC3A2* | 0.166700701569312 | 0.007174034 |
| *RPUSD4* | -0.1666658112 | 0.007186308 |
| *TCL6* | 0.166659305365296 | 0.007188599 |
| *HIST1H2BB* | 0.166641131879554 | 0.007195001 |
| *PTGFRN* | -0.1666401291 | 0.007195354 |
| *FADS1* | 0.166610156898993 | 0.007205925 |
| *ATP6V0D1* | -0.1666060784 | 0.007207365 |
| *C17orf71* | 0.166587093055588 | 0.007214069 |
| *RNF157* | 0.166564176984987 | 0.007222168 |
| *FCN2* | -0.1665633618 | 0.007222456 |
| *C3orf30* | 0.166558975576007 | 0.007224008 |
| *MFAP4* | -0.1665364260 | 0.007231987 |
| *SIX2* | 0.166527921982777 | 0.007234999 |
| *NPFF* | -0.1665270449 | 0.007235309 |
| *MTERF* | 0.16652554536575 | 0.007235841 |
| *RPS27* | -0.1665007230 | 0.007244638 |
| *ZNF554* | -0.1665003311 | 0.007244777 |
| *KRT79* | 0.166460681018078 | 0.007258849 |
| *BCL2* | -0.1664382702 | 0.007266814 |
| *LUZP6* | 0.166430025510974 | 0.007269746 |
| *IGF1R* | 0.166389686177406 | 0.007284107 |
| *TUB* | -0.1663393703 | 0.007302056 |
| *PLIN1* | -0.1662892945 | 0.007319958 |
| *RPS11* | -0.1661913647 | 0.00735508 |
| *PGAM4* | 0.166175522900861 | 0.007360776 |
| *OSBPL1A* | -0.1661743846 | 0.007361186 |
| *UROD* | -0.1661537191 | 0.007368622 |
| *ETFB* | -0.1661484151 | 0.007370532 |
| *ST6GALNAC1* | -0.1661284993 | 0.007377706 |
| *NANOS1* | -0.1660935973 | 0.007390295 |
| *PDZD8* | 0.166088865131642 | 0.007392003 |
| *HPS5* | 0.166083059642315 | 0.007394099 |
| *ZNF16* | -0.1660798517 | 0.007395258 |
| *GTF2A1L* | -0.1660694864 | 0.007399002 |
| *CDC42EP4* | -0.1660436131 | 0.007408356 |
| *SGPP1* | 0.166012757351241 | 0.007419526 |
| *PLEKHA7* | -0.1660081304 | 0.007421202 |
| *MYLK* | -0.1660050219 | 0.007422328 |
| *GIPC2* | -0.1660019019 | 0.007423459 |
| *TPPP2* | -0.1659924143 | 0.007426898 |
| *MINPP1* | 0.165949973822281 | 0.007442299 |
| *AEN* | 0.165932053091664 | 0.00744881 |
| *SH2D5* | 0.165919131363723 | 0.007453509 |
| *LOC349196* | -0.1658882164 | 0.00746476 |
| *PRG4* | 0.165879053174902 | 0.007468098 |
| *LARP4* | 0.165862090888296 | 0.00747428 |
| *TMEM167A* | 0.165838438675873 | 0.007482908 |
| *APOC4* | 0.165829578082935 | 0.007486143 |
| *NBPF14* | 0.165802196919321 | 0.007496147 |
| *FAM22G* | 0.165799173361622 | 0.007497252 |
| *OBFC2B* | 0.165794172728972 | 0.00749908 |
| *TUBB2B* | 0.165779009729839 | 0.007504627 |
| *PIWIL4* | -0.1657369932 | 0.007520016 |
| *GUF1* | 0.165692664255467 | 0.007536283 |
| *TMCC3* | -0.1656756165 | 0.007542547 |
| *MFGE8* | -0.1656149856 | 0.007564863 |
| *ATF7IP* | 0.165610389062413 | 0.007566557 |
| *PKD1* | -0.1655912634 | 0.00757361 |
| *PNPT1* | 0.16558975891355 | 0.007574165 |
| *NTN3* | 0.165550564033716 | 0.007588638 |
| *STC2* | 0.165493540253978 | 0.007609739 |
| *CD2AP* | 0.165487502510581 | 0.007611976 |
| *SIX3* | 0.165485835120183 | 0.007612594 |
| *ZAK* | -0.1654499154 | 0.007625917 |
| *FAM8A1* | -0.1654461611 | 0.00762731 |
| *C9orf163* | 0.165402920661848 | 0.007643379 |
| *MOSPD2* | 0.165376276486982 | 0.007653295 |
| *ANKDD1A* | -0.1653757532 | 0.00765349 |
| *DEFB126* | 0.165369947001811 | 0.007655652 |
| *RARRES3* | -0.1653523429 | 0.007662212 |
| *ZCCHC17* | 0.165350193581193 | 0.007663013 |
| *MRPS28* | 0.165334483718538 | 0.007668872 |
| *RGPD4* | 0.165315314006123 | 0.007676026 |
| *NBPF16* | 0.165283408054752 | 0.007687947 |
| *STARD3NL* | 0.165247826286059 | 0.007701261 |
| *ATP8A1* | -0.1652441292 | 0.007702645 |
| *C16orf42* | -0.1651957295 | 0.007720791 |
| *SNRPF* | 0.165163237133553 | 0.007732994 |
| *ACOT1* | -0.1651065571 | 0.007754323 |
| *ST7OT4* | 0.165100739313858 | 0.007756515 |
| *MFF* | -0.1651000504 | 0.007756775 |
| *POGK* | 0.165097776485449 | 0.007757631 |
| *ACSS1* | -0.1650875124 | 0.007761501 |
| *LOC100128292* | -0.1650598639 | 0.007771933 |
| *C22orf32* | -0.1650082674 | 0.007791433 |
| *TMEM79* | 0.16496516884417 | 0.007807755 |
| *TRIM25* | 0.164948121192906 | 0.00781422 |
| *NACAD* | -0.1648555487 | 0.007849408 |
| *PROZ* | 0.164776730335963 | 0.007879478 |
| *ZNF671* | -0.1647635567 | 0.007884514 |
| *EIF3E* | -0.1647540898 | 0.007888135 |
| *MRPL54* | -0.1647183531 | 0.007901816 |
| *SCRT1* | 0.16471447637436 | 0.007903302 |
| *TMEM134* | -0.1646975092 | 0.007909806 |
| *C9orf3* | -0.1646963276 | 0.007910259 |
| *AMY2A* | -0.1646840589 | 0.007914965 |
| *COX17* | -0.1646759338 | 0.007918084 |
| *NFKBIA* | -0.1646479241 | 0.007928841 |
| *PTK2B* | -0.1646437909 | 0.00793043 |
| *RILPL1* | -0.1646319772 | 0.007934972 |
| *C17orf105* | 0.16463077741176 | 0.007935433 |
| *PDE9A* | -0.1646155273 | 0.0079413 |
| *OR4E2* | -0.1646114987 | 0.007942851 |
| *GIMAP5* | -0.1645956529 | 0.007948952 |
| *ALOX12B* | 0.164553326804993 | 0.007965269 |
| *LRRC42* | 0.164546762818895 | 0.007967803 |
| *ONECUT1* | 0.164528518357049 | 0.007974847 |
| *GALNT11* | -0.1644979831 | 0.007986651 |
| *DLG4* | -0.1644172010 | 0.008017951 |
| *CCDC52* | 0.164402765460612 | 0.008023556 |
| *OLFML2B* | 0.164369382633098 | 0.008036531 |
| *ZNF623* | 0.164363508951882 | 0.008038815 |
| *IGDCC3* | 0.16428926532232 | 0.008067746 |
| *NEURL2* | -0.1642823674 | 0.008070438 |
| *PGP* | 0.164273472791672 | 0.008073911 |
| *CUEDC2* | -0.1642717286 | 0.008074593 |
| *LGALS2* | -0.1642460556 | 0.008084625 |
| *TPRKB* | 0.164230280064453 | 0.008090796 |
| *PPP3R1* | 0.16422121352903 | 0.008094344 |
| *CNST* | -0.1642167299 | 0.0080961 |
| *DCUN1D1* | 0.164185251678498 | 0.008108432 |
| *PXK* | 0.164175242790515 | 0.008112357 |
| *RRP9* | 0.164154763905243 | 0.008120392 |
| *TCEB3B* | 0.164145038951342 | 0.00812421 |
| *RTN4R* | 0.164076652195788 | 0.008151107 |
| *FAM98C* | -0.1640420709 | 0.008164738 |
| *EAPP* | -0.1640167588 | 0.008174728 |
| *PMVK* | -0.1639204288 | 0.008212846 |
| *EIF3A* | 0.163909053801363 | 0.008217358 |
| *MTIF3* | -0.1638913130 | 0.008224399 |
| *KIAA0020* | 0.163871835768587 | 0.008232135 |
| *NAB2* | -0.1638637927 | 0.008235331 |
| *KHDC1L* | 0.163837484846631 | 0.008245795 |
| *TOMM40L* | -0.1638353252 | 0.008246654 |
| *CCDC106* | -0.1638311011 | 0.008248335 |
| *PCNP* | -0.1638293960 | 0.008249014 |
| *RNGTT* | 0.163827660303246 | 0.008249705 |
| *TSPAN6* | 0.163814705633221 | 0.008254864 |
| *PTPRJ* | 0.163811511569237 | 0.008256136 |
| *LOC220429* | 0.163802702831036 | 0.008259646 |
| *FKBP3* | 0.163795375316208 | 0.008262567 |
| *ADIPOR2* | 0.163780383606452 | 0.008268546 |
| *REL* | 0.163762465900772 | 0.008275696 |
| *SOCS1* | 0.163730459623008 | 0.008288483 |
| *RHPN1* | -0.1637229934 | 0.008291468 |
| *CASP10* | -0.1636960064 | 0.008302266 |
| *PTGDR* | -0.1636898356 | 0.008304737 |
| *CCNC* | 0.163656339726549 | 0.008318161 |
| *SEMA4G* | -0.1636556029 | 0.008318457 |
| *ACOXL* | 0.163614565847276 | 0.008334929 |
| *GPX8* | 0.163604810883051 | 0.008338849 |
| *TMEM106C* | 0.163604603486095 | 0.008338933 |
| *SNX33* | -0.1635933496 | 0.008343457 |
| *C17orf78* | -0.1635886157 | 0.008345361 |
| *ANKRD43* | 0.163573087045802 | 0.008351609 |
| *MOSC1* | -0.1635695532 | 0.008353031 |
| *CHIC1* | -0.1635485160 | 0.008361504 |
| *MAMDC2* | -0.1635410652 | 0.008364506 |
| *MAGEE1* | -0.1635285176 | 0.008369565 |
| *ANO8* | 0.163489261668685 | 0.008385408 |
| *PCDHGB1* | 0.163482109929621 | 0.008388297 |
| *C10orf2* | 0.163465728833958 | 0.008394918 |
| *NYX* | 0.163433656300372 | 0.008407895 |
| *ZBTB8B* | 0.163433181163973 | 0.008408088 |
| *CNP* | -0.1634175591 | 0.008414415 |
| *GRASP* | -0.1634040686 | 0.008419883 |
| *CAGE1* | 0.163387487735923 | 0.008426607 |
| *FAM138D* | -0.1633177624 | 0.008454937 |
| *TSHR* | 0.163305297697116 | 0.00846001 |
| *SLC5A9* | -0.1632712878 | 0.008473866 |
| *FAM65A* | -0.1632157510 | 0.008496536 |
| *C2orf56* | -0.1631915093 | 0.008506449 |
| *MRPL15* | 0.163163711652085 | 0.008517828 |
| *TBR1* | 0.163155747384996 | 0.008521091 |
| *HBA1* | -0.1631538949 | 0.00852185 |
| *PTPLB* | 0.163151447367416 | 0.008522853 |
| *OR2H1* | 0.163138564968227 | 0.008528133 |
| *ALKBH1* | 0.163135391916702 | 0.008529435 |
| *HOXA13* | 0.163104952125209 | 0.008541926 |
| *CLPB* | 0.16306591496041 | 0.008557969 |
| *PDGFB* | -0.1630129959 | 0.00857976 |
| *GTF2H4* | 0.16300782496317 | 0.008581892 |
| *EIF2S2* | 0.162956404915568 | 0.008603117 |
| *P2RX5* | 0.162943549352069 | 0.008608431 |
| *TTC21A* | -0.1629337373 | 0.008612489 |
| *GHRL* | -0.1629144221 | 0.008620482 |
| *SLC12A6* | 0.16289853021556 | 0.008627063 |
| *RNF150* | -0.1628976818 | 0.008627414 |
| *CXorf27* | 0.162849574006945 | 0.008647365 |
| *KRTAP21-1* | 0.162823841996304 | 0.008658053 |
| *GLUD2* | 0.162818380228953 | 0.008660323 |
| *AQP10* | -0.1628094926 | 0.008664018 |
| *LOC285548* | 0.162806122733639 | 0.008665419 |
| *PAR1* | -0.1627941537 | 0.008670398 |
| *DMRT2* | 0.162785104630946 | 0.008674165 |
| *PTPMT1* | -0.1627595925 | 0.00868479 |
| *TSPAN5* | 0.162680686713617 | 0.008717728 |
| *FLJ43390* | 0.162671549736911 | 0.008721549 |
| *ZBTB1* | 0.162658421575014 | 0.008727042 |
| *PCSK9* | 0.162638786681091 | 0.008735263 |
| *DOLK* | -0.1626383441 | 0.008735448 |
| *SH2D7* | 0.162633972520459 | 0.00873728 |
| *MAGEA1* | 0.162616356208589 | 0.008744663 |
| *CYP27A1* | -0.1625930155 | 0.008754454 |
| *GPR156* | 0.162500394434561 | 0.008793403 |
| *CCDC28A* | -0.1624930317 | 0.008796506 |
| *TK2* | -0.1624733569 | 0.008804802 |
| *LOC134466* | -0.1623931080 | 0.008838711 |
| *CYP26B1* | 0.162388652961826 | 0.008840597 |
| *YWHAG* | 0.162357440957112 | 0.00885382 |
| *MFAP1* | 0.162338790329296 | 0.00886173 |
| *HOXD3* | -0.1623367686 | 0.008862587 |
| *GTF3C1* | 0.162288207091049 | 0.008883213 |
| *PHAX* | 0.162284361498651 | 0.008884848 |
| *LOH3CR2A* | -0.1622722086 | 0.008890017 |
| *DUSP19* | -0.1622427629 | 0.008902553 |
| *RSPRY1* | 0.162239776279468 | 0.008903825 |
| *RAB34* | -0.1622377481 | 0.00890469 |
| *CES4* | -0.1622044853 | 0.008918872 |
| *METTL2A* | 0.162189875064668 | 0.008925108 |
| *CCKBR* | -0.1621688202 | 0.008934102 |
| *PABPC3* | 0.162168326781393 | 0.008934313 |
| *USP9Y* | -0.1621543678 | 0.00894028 |
| *AK7* | -0.1621026366 | 0.008962424 |
| *OR2B11* | -0.1620778220 | 0.008973063 |
| *GLI4* | -0.1620410931 | 0.008988832 |
| *IL17RE* | -0.1619732622 | 0.009018018 |
| *GPR64* | 0.16196342374383 | 0.009022258 |
| *FAIM2* | -0.1619450154 | 0.009030196 |
| *GJB2* | 0.161934428550388 | 0.009034765 |
| *HNRPLL* | 0.161912480945728 | 0.009044242 |
| *ECHDC2* | -0.1619079680 | 0.009046192 |
| *C12orf24* | 0.161853857349991 | 0.009069599 |
| *PIK3R1* | -0.1618372256 | 0.009076805 |
| *OTX2* | 0.161805040501994 | 0.009090763 |
| *C1orf115* | -0.1617803719 | 0.009101474 |
| *OFD1* | 0.161743977710201 | 0.009117297 |
| *CHRM5* | 0.161736544116389 | 0.009120532 |
| *TOR2A* | 0.161731342206385 | 0.009122796 |
| *FAM26E* | -0.1617273835 | 0.00912452 |
| *LOC284578* | -0.1616649612 | 0.009151735 |
| *BICD1* | 0.161642670712311 | 0.00916147 |
| *MAL* | -0.1616394974 | 0.009162857 |
| *FAM162A* | -0.1616188182 | 0.009171898 |
| *LOC81691* | 0.161615899461095 | 0.009173175 |
| *KRT80* | 0.161593547274123 | 0.009182958 |
| *SRGAP2* | 0.161558034929274 | 0.00919852 |
| *SIX5* | -0.1615155066 | 0.009217187 |
| *CLDN14* | 0.161501340122351 | 0.009223413 |
| *MAN2B2* | -0.1614970848 | 0.009225284 |
| *BTAF1* | 0.16146646343497 | 0.009238756 |
| *STX18* | 0.161401952430692 | 0.009267195 |
| *AEBP1* | -0.1613958513 | 0.009269889 |
| *C7orf71* | 0.161367957223201 | 0.009282213 |
| *DTNA* | -0.1613668660 | 0.009282695 |
| *PPY2* | 0.161327263836338 | 0.009300218 |
| *C6orf204* | 0.161308465792301 | 0.009308546 |
| *ACOX1* | -0.1612866999 | 0.009318196 |
| *MAGEA10* | 0.161274161713842 | 0.00932376 |
| *KDM5D* | -0.1612567047 | 0.009331511 |
| *PPP1CA* | 0.161256046399276 | 0.009331803 |
| *RGPD5* | 0.161202512803526 | 0.009355608 |
| *FDPS* | 0.161193951172181 | 0.00935942 |
| *IL17B* | -0.1611778447 | 0.009366596 |
| *ACER3* | 0.161173424732359 | 0.009368565 |
| *CDK14* | 0.161150434025636 | 0.009378818 |
| *GDAP1L1* | -0.1611307353 | 0.00938761 |
| *NCOA7* | -0.1611116977 | 0.009396114 |
| *CMTM6* | 0.161109301566451 | 0.009397185 |
| *LOC400891* | 0.161053099123642 | 0.009422334 |
| *FYN* | 0.161049273441119 | 0.009424048 |
| *SH3BP4* | 0.161045400501097 | 0.009425783 |
| *PGK2* | 0.161006194022132 | 0.009443368 |
| *RAD54L2* | 0.16098638062205 | 0.009452265 |
| *ZMAT2* | -0.1609743809 | 0.009457657 |
| *SPATA20* | -0.1609681293 | 0.009460468 |
| *LOC285501* | 0.160962703950807 | 0.009462907 |
| *C5orf49* | -0.1609507044 | 0.009468305 |
| *MRPL50* | 0.160947257426274 | 0.009469856 |
| *METTL12* | -0.1609361334 | 0.009474863 |
| *ANK1* | 0.160926136382223 | 0.009479364 |
| *ZDHHC6* | 0.16092389786034 | 0.009480373 |
| *C14orf104* | 0.160909942538223 | 0.009486661 |
| *KIAA1826* | -0.1608848872 | 0.009497959 |
| *XAGE5* | 0.160879046382829 | 0.009500595 |
| *F13B* | 0.16085826823493 | 0.009509976 |
| *MDH1B* | -0.1608228585 | 0.009525982 |
| *LOC400804* | -0.1608014658 | 0.009535663 |
| *C1orf103* | 0.160795178949209 | 0.00953851 |
| *SLC1A1* | -0.1607681204 | 0.009550771 |
| *ZNF784* | -0.1607425831 | 0.009562356 |
| *ABLIM1* | -0.1607032646 | 0.009580217 |
| *OR7A5* | 0.160701226781481 | 0.009581144 |
| *DNASE1L2* | 0.160694419957591 | 0.009584239 |
| *BZW1* | 0.160665110546522 | 0.009597578 |
| *INTS4* | 0.160616845677276 | 0.009619578 |
| *DSCR9* | 0.160607324213798 | 0.009623924 |
| *FAM167A* | 0.16060721271813 | 0.009623975 |
| *NUP98* | 0.160593128032866 | 0.009630406 |
| *OMA1* | -0.1605895222 | 0.009632053 |
| *KLF11* | -0.1605888900 | 0.009632342 |
| *ITGB1BP2* | -0.1605875094 | 0.009632973 |
| *B4GALT5* | 0.160583440548969 | 0.009634832 |
| *SLC38A7* | 0.160535814455023 | 0.009656616 |
| *SDF2L1* | 0.160493426657096 | 0.00967604 |
| *AKT1* | 0.160484927391088 | 0.009679939 |
| *HHLA1* | 0.160456603753533 | 0.009692943 |
| *HMX3* | 0.160431484424811 | 0.009704488 |
| *LOC338799* | -0.1604246336 | 0.009707639 |
| *GZMM* | -0.1602861081 | 0.009771546 |
| *GTF2H5* | -0.1602798442 | 0.009774445 |
| *LOC728554* | 0.160277201415642 | 0.009775668 |
| *ST6GALNAC4* | -0.1602696228 | 0.009779176 |
| *ATF4* | -0.1602629642 | 0.009782259 |
| *EIF3G* | -0.1602607669 | 0.009783277 |
| *OR13J1* | -0.1602360725 | 0.009794721 |
| *SPDYE6* | 0.160200237649858 | 0.009811348 |
| *COG7* | -0.1601996175 | 0.009811636 |
| *SGK269* | 0.16019667467467 | 0.009813003 |
| *CPSF4* | 0.160172618949038 | 0.00982418 |
| *CEACAM20* | -0.1601477655 | 0.00983574 |
| *APH1A* | 0.160138775837803 | 0.009839925 |
| *DOCK6* | -0.1601216827 | 0.009847885 |
| *VPS39* | -0.1600656324 | 0.009874028 |
| *CYorf15A* | -0.1600584936 | 0.009877362 |
| *SPHK1* | 0.16002593609528 | 0.009892581 |
| *ABCA2* | -0.1600141470 | 0.009898097 |
| *GRM2* | 0.160013570309354 | 0.009898367 |
| *NDUFS4* | -0.1599959057 | 0.009906636 |
| *UACA* | 0.159991880537356 | 0.009908522 |
| *TOE1* | 0.159963437924664 | 0.009921853 |
| *OR2M4* | 0.159959000479218 | 0.009923934 |
| *SEC22C* | -0.1599511019 | 0.00992764 |
| *MAP3K6* | -0.1599486373 | 0.009928796 |
| *ANKRD24* | -0.1599188686 | 0.009942774 |
| *RAD9A* | 0.159893070316822 | 0.009954902 |
| *C6orf162* | -0.1598829742 | 0.009959652 |
| *C11orf53* | 0.159875072392344 | 0.009963371 |
| *C20orf11* | 0.159870981338984 | 0.009965297 |
| *ZNF689* | 0.159866697873488 | 0.009967314 |
| *PSTPIP2* | 0.159851703203631 | 0.009974377 |
| *RAB22A* | 0.159830400352824 | 0.009984418 |
| *LOC144486* | 0.159824066574267 | 0.009987406 |
| *SLC4A3* | -0.1598098157 | 0.00999413 |
| *CHI3L2* | -0.1597769683 | 0.010009645 |
| *ESRRA* | -0.1597673279 | 0.010014202 |
| *VPS37C* | -0.1597632873 | 0.010016113 |
| *OPRD1* | 0.159752045073148 | 0.010021431 |
| *HMCN1* | 0.159713714334509 | 0.010039581 |
| *ZNF713* | 0.159699113294116 | 0.010046503 |
| *COL5A2* | 0.159686466126446 | 0.010052502 |
| *ACRBP* | -0.1596447124 | 0.010072329 |
| *DDX3Y* | -0.1595846223 | 0.010100924 |
| *PUSL1* | 0.159582159141849 | 0.010102097 |
| *ADAM20* | -0.1595502817 | 0.010117297 |
| *NCRNA00158* | 0.159526153573324 | 0.010128816 |
| *FLAD1* | 0.159510760227898 | 0.01013617 |
| *PYROXD1* | -0.1595044660 | 0.010139179 |
| *DIP2C* | -0.1594961203 | 0.01014317 |
| *CREB3* | -0.1594852457 | 0.010148371 |
| *GOLGA5* | 0.159481392924694 | 0.010150215 |
| *DNAJC27* | -0.1594812585 | 0.010150279 |
| *LLGL2* | -0.1594685474 | 0.010156363 |
| *PDCD2L* | 0.159460980692584 | 0.010159987 |
| *HLX* | -0.1594381634 | 0.01017092 |
| *PHLDA1* | 0.159435508130608 | 0.010172193 |
| *SBDSP1* | -0.1594126570 | 0.010183154 |
| *GALNT10* | 0.159371694049776 | 0.010202828 |
| *SMPD1* | -0.1593594775 | 0.010208703 |
| *PHKG2* | -0.1593450994 | 0.01021562 |
| *IQCG* | 0.159330913245934 | 0.010222449 |
| *REXO1* | 0.159311726128083 | 0.010231692 |
| *APOC1* | 0.159311151596512 | 0.010231969 |
| *TMED5* | 0.159281052570666 | 0.010246484 |
| *SHPK* | 0.159251271021585 | 0.010260863 |
| *PHOX2B* | 0.159213967624641 | 0.0102789 |
| *SNORA26* | -0.1591876502 | 0.010291641 |
| *DAP* | 0.15916127850889 | 0.010304423 |
| *MBOAT2* | 0.159154874166218 | 0.01030753 |
| *BRI3* | -0.1591481851 | 0.010310775 |
| *C14orf109* | 0.159135758592623 | 0.010316806 |
| *APCDD1* | -0.1591245058 | 0.01032227 |
| *ENHO* | 0.159108515369843 | 0.010330039 |
| *MYH2* | 0.159082655103666 | 0.010342614 |
| *MRPS9* | -0.1590772645 | 0.010345237 |
| *DUOX2* | -0.1590690871 | 0.010349217 |
| *C19orf36* | -0.1590688185 | 0.010349348 |
| *TRIM37* | 0.159067099623076 | 0.010350185 |
| *KIAA0664* | 0.159065169797406 | 0.010351125 |
| *BCL7B* | -0.1590619188 | 0.010352708 |
| *POLR2B* | 0.159019256665121 | 0.010373501 |
| *TM4SF18* | -0.1590180740 | 0.010374078 |
| *SSR1* | 0.159003200937688 | 0.010381336 |
| *LRRC52* | 0.158961967221045 | 0.010401481 |
| *CCDC158* | -0.1589336923 | 0.010415316 |
| *MEIG1* | 0.158912005896892 | 0.010425937 |
| *IDE* | 0.158910503178611 | 0.010426674 |
| *PGBD5* | 0.158909430543863 | 0.010427199 |
| *AMIGO2* | -0.1588906635 | 0.0104364 |
| *HIF1A* | 0.15887441334567 | 0.010444372 |
| *WRB* | -0.1588536440 | 0.01045457 |
| *SUGT1L1* | -0.1588388732 | 0.010461827 |
| *LRRC28* | 0.158835386547758 | 0.010463541 |
| *SNPH* | -0.1588213908 | 0.010470423 |
| *UBE3B* | -0.1588197704 | 0.01047122 |
| *WNT9B* | -0.1587718022 | 0.010494838 |
| *LOC285401* | 0.158718278941142 | 0.010521248 |
| *CAPN1* | -0.1587132053 | 0.010523754 |
| *C6orf191* | 0.15870122385777 | 0.010529675 |
| *TCIRG1* | -0.1586774875 | 0.010541414 |
| *MASP1* | -0.1586764308 | 0.010541937 |
| *PREPL* | -0.1586420417 | 0.010558966 |
| *ZFAND2B* | -0.1586155080 | 0.010572121 |
| *TMEM9* | -0.1585933900 | 0.010583099 |
| *C10orf68* | -0.1585896995 | 0.010584931 |
| *RTCD1* | 0.158586492082295 | 0.010586524 |
| *PALMD* | -0.1585568628 | 0.010601249 |
| *PCDH20* | -0.1585182422 | 0.01062047 |
| *BAT3* | 0.158485832441779 | 0.010636624 |
| *IGSF9B* | -0.1584801158 | 0.010639475 |
| *FASTK* | -0.1584641184 | 0.010647458 |
| *EEF1G* | -0.1584620102 | 0.010648511 |
| *MBD5* | -0.1584361598 | 0.010661423 |
| *VASH2* | 0.158434678546528 | 0.010662164 |
| *YEATS4* | 0.15842283506838 | 0.010668085 |
| *C12orf10* | -0.1583953363 | 0.010681843 |
| *NPC1* | 0.158370199201186 | 0.010694434 |
| *JMJD7-PLA2G4B* | -0.1583681965 | 0.010695438 |
| *MYOC* | -0.1583646864 | 0.010697197 |
| *FAM185A* | -0.1583402696 | 0.010709443 |
| *FABP6* | 0.158334698047837 | 0.010712239 |
| *ZNF567* | 0.158324528927422 | 0.010717343 |
| *RPL36* | -0.1583221461 | 0.01071854 |
| *C6orf64* | 0.158318984479682 | 0.010720128 |
| *SLC31A2* | 0.158306350838648 | 0.010726474 |
| *USP12* | 0.158301000244137 | 0.010729163 |
| *C2orf61* | 0.158258429159151 | 0.010750577 |
| *ANKRD33* | 0.158234105373837 | 0.01076283 |
| *TAF10* | -0.1581725156 | 0.010793909 |
| *GFM2* | 0.158169067033501 | 0.010795652 |
| *MYEOV* | 0.158161120461087 | 0.010799668 |
| *HOXB2* | -0.1581547183 | 0.010802905 |
| *TMEM19* | 0.158146035057146 | 0.010807296 |
| *CNRIP1* | -0.1581325757 | 0.010814106 |
| *POLR3GL* | -0.1581031086 | 0.010829029 |
| *LEPREL2* | -0.1580848797 | 0.010838269 |
| *C20orf54* | -0.1580770977 | 0.010842216 |
| *CCDC144A* | 0.158066255259493 | 0.010847717 |
| *PF4* | 0.158058043093354 | 0.010851886 |
| *IGF2BP2* | 0.158016922896669 | 0.010872779 |
| *ABCC8* | -0.1580150703 | 0.010873721 |
| *GLB1L2* | -0.1580131769 | 0.010874684 |
| *ERP29* | -0.1580097236 | 0.01087644 |
| *SLC22A3* | -0.1580085255 | 0.01087705 |
| *GSR* | 0.15800543287926 | 0.010878623 |
| *SLC35F5* | 0.157990535713555 | 0.010886204 |
| *AFAP1L1* | -0.1579517857 | 0.010905947 |
| *CEP350* | 0.157923395009798 | 0.010920432 |
| *SRPK2* | 0.157920481487829 | 0.010921919 |
| *SVOP* | -0.1578696141 | 0.010947917 |
| *SRI* | -0.1578694141 | 0.01094802 |
| *MARVELD3* | 0.157867483823313 | 0.010949007 |
| *C22orf36* | -0.1578534852 | 0.010956172 |
| *C6orf155* | -0.1578480096 | 0.010958976 |
| *RSPH1* | -0.1578378442 | 0.010964182 |
| *LRRC4B* | -0.1578254233 | 0.010970547 |
| *HIPK1* | 0.157788602984876 | 0.010989434 |
| *EIF1AY* | -0.1577843064 | 0.01099164 |
| *ANKRD36BP1* | 0.157763461332144 | 0.011002347 |
| *LOC729668* | -0.1577432280 | 0.011012749 |
| *SI* | -0.1577388452 | 0.011015003 |
| *SFRS2IP* | 0.157683008564513 | 0.011043759 |
| *NDUFA5* | -0.1576518731 | 0.011059822 |
| *FBL* | 0.157631801328002 | 0.011070188 |
| *RPS27L* | -0.1576052799 | 0.011083899 |
| *PPA2* | -0.1575997692 | 0.01108675 |
| *ARF3* | -0.1575500508 | 0.011112498 |
| *C20orf12* | 0.157516579787423 | 0.011129862 |
| *C3orf54* | -0.1575096140 | 0.011133479 |
| *EIF2B4* | -0.1574976788 | 0.011139678 |
| *ECH1* | -0.1574925288 | 0.011142354 |
| *ZNF682* | 0.157467349116472 | 0.011155445 |
| *C12orf72* | -0.1574492619 | 0.011164857 |
| *FAM100A* | -0.1574230151 | 0.011178528 |
| *FLT3LG* | -0.1574200204 | 0.011180089 |
| *IFFO1* | -0.1574172550 | 0.01118153 |
| *ANKRD36B* | 0.15741076129859 | 0.011184916 |
| *ANKRD1* | 0.157390207050697 | 0.011195637 |
| *MRPL30* | 0.157349026488435 | 0.011217145 |
| *APOBEC3G* | -0.1573248175 | 0.011229806 |
| *ZFPM2* | -0.1572823243 | 0.01125206 |
| *C2orf47* | -0.1572773987 | 0.011254642 |
| *NR2C2AP* | 0.157246811459323 | 0.011270688 |
| *LOC646471* | 0.157216007789766 | 0.011286868 |
| *ATG4B* | -0.1572127579 | 0.011288576 |
| *RNF139* | -0.1571858251 | 0.011302742 |
| *PCDHB4* | -0.1571766476 | 0.011307572 |
| *C6orf105* | 0.157165959771657 | 0.0113132 |
| *STOML1* | -0.1571559047 | 0.011318497 |
| *NOX4* | -0.1571532217 | 0.011319911 |
| *SIX4* | 0.157141868955123 | 0.011325894 |
| *COQ4* | -0.1571363871 | 0.011328785 |
| *MIXL1* | 0.157129388741386 | 0.011332476 |
| *WNK4* | 0.157126270340811 | 0.01133412 |
| *HSD17B8* | -0.1571223546 | 0.011336186 |
| *CLTC* | 0.157116644089727 | 0.0113392 |
| *ZIC5* | 0.157115270888011 | 0.011339924 |
| *OBSCN* | -0.1571018365 | 0.011347017 |
| *SNRPA* | 0.157095725656225 | 0.011350244 |
| *ABCA13* | 0.157075395414542 | 0.011360987 |
| *C21orf91* | 0.157067680223855 | 0.011365066 |
| *BMS1* | 0.15706249999686 | 0.011367806 |
| *SLC44A3* | -0.1570597544 | 0.011369258 |
| *CDC37L1* | -0.1570448141 | 0.011377163 |
| *C1orf51* | -0.1570434234 | 0.0113779 |
| *STON1* | -0.1570379254 | 0.01138081 |
| *SECTM1* | -0.1570357555 | 0.011381959 |
| *SLC10A5* | -0.1570295565 | 0.011385242 |
| *ANKRD6* | -0.1570080912 | 0.011396616 |
| *DCAF4L2* | 0.15700621681901 | 0.011397609 |
| *NUDT11* | 0.156988804715492 | 0.011406843 |
| *LOC729020* | 0.156978780413435 | 0.011412163 |
| *PDE4DIP* | 0.156977467426242 | 0.01141286 |
| *GPX5* | 0.156970177221533 | 0.01141673 |
| *ACBD3* | 0.156963777154264 | 0.011420128 |
| *ZNF415* | -0.1568666648 | 0.011471804 |
| *RGS5* | -0.1568570832 | 0.011476914 |
| *ZNF613* | -0.1568544185 | 0.011478335 |
| *HEATR7A* | -0.1568449622 | 0.011483381 |
| *ART5* | -0.1568410017 | 0.011485494 |
| *METT5D1* | -0.1568260436 | 0.011493481 |
| *GTSF1* | 0.156812695738329 | 0.011500611 |
| *FAM181A* | -0.1567982702 | 0.011508322 |
| *NBPF10* | 0.156790394644446 | 0.011512534 |
| *SCRIB* | 0.156787675612104 | 0.011513988 |
| *IGFBP5* | -0.1567778490 | 0.011519246 |
| *AP4S1* | -0.1567613863 | 0.011528058 |
| *NSA2* | -0.1567468136 | 0.011535864 |
| *HARBI1* | 0.156744366440599 | 0.011537176 |
| *PSMD10* | 0.156735258809083 | 0.011542057 |
| *LOC440461* | -0.1567210125 | 0.011549696 |
| *SUN1* | 0.15670427737283 | 0.011558676 |
| *GPR1* | 0.156698411703865 | 0.011561824 |
| *SHC1* | -0.1566983745 | 0.011561844 |
| *UTF1* | -0.1566921763 | 0.011565172 |
| *ZNF687* | 0.156691000720187 | 0.011565804 |
| *RBM38* | -0.1566400415 | 0.011593199 |
| *P2RY8* | -0.1566293154 | 0.011598973 |
| *ABT1* | 0.156618656275327 | 0.011604713 |
| *SAT2* | -0.1565953235 | 0.011617287 |
| *IL22RA2* | 0.156593823136254 | 0.011618096 |
| *FGF21* | 0.156592425481292 | 0.011618849 |
| *GAL3ST4* | -0.1565369833 | 0.011648778 |
| *RBM10* | 0.15653373752529 | 0.011650533 |
| *RNF125* | -0.1565077011 | 0.011664613 |
| *BSPH1* | 0.156503535781753 | 0.011666867 |
| *ZNF8* | 0.156501153723732 | 0.011668156 |
| *ANPEP* | 0.156491573098943 | 0.011673343 |
| *LOC100130093* | -0.1564873270 | 0.011675642 |
| *MYO9A* | 0.15645313121309 | 0.011694173 |
| *MOS* | 0.156451730707455 | 0.011694932 |
| *COL14A1* | -0.1564514974 | 0.011695059 |
| *BOP1* | 0.156420360137721 | 0.011711956 |
| *AGAP11* | -0.1564159465 | 0.011714353 |
| *UGP2* | -0.1564155404 | 0.011714574 |
| *CCDC85B* | -0.1563890102 | 0.011728991 |
| *TFPI2* | 0.156388907521384 | 0.011729047 |
| *ZBTB22* | -0.1563763481 | 0.011735877 |
| *KCNB1* | -0.1563590603 | 0.011745285 |
| *NSD1* | 0.156321364658354 | 0.011765822 |
| *RANBP6* | 0.156304252046687 | 0.011775155 |
| *CCDC110* | -0.1563027254 | 0.011775988 |
| *SCRT2* | -0.1562763925 | 0.011790364 |
| *SPANXC* | 0.156267128788547 | 0.011795425 |
| *RAI14* | 0.156260104250344 | 0.011799264 |
| *C8orf4* | -0.1562342050 | 0.011813428 |
| *STOX1* | 0.156233261569461 | 0.011813944 |
| *CLDN22* | -0.1562245453 | 0.011818714 |
| *CCDC149* | -0.1561830219 | 0.011841463 |
| *ZBTB24* | 0.156182882484942 | 0.011841539 |
| *HIST1H4I* | 0.156182135309303 | 0.011841949 |
| *PLEKHG6* | -0.1561070469 | 0.011883185 |
| *ZNF454* | -0.1561025015 | 0.011885686 |
| *CORO1B* | -0.1561016737 | 0.011886141 |
| *MYO15A* | -0.1560881024 | 0.011893609 |
| *STAU1* | 0.156078652131614 | 0.011898812 |
| *PQLC2* | 0.15604968182138 | 0.011914774 |
| *RPL5* | -0.1560026412 | 0.011940733 |
| *STK39* | 0.156002033418162 | 0.011941068 |
| *TRAPPC2L* | -0.1559934155 | 0.011945829 |
| *MTHFD2* | 0.155973031628249 | 0.011957098 |
| *SPSB4* | 0.155964722717101 | 0.011961693 |
| *NOVA2* | -0.1558798471 | 0.012008729 |
| *MYO1A* | -0.1558675841 | 0.012015539 |
| *POP7* | 0.15586465049305 | 0.012017168 |
| *HTA* | 0.155863405622553 | 0.01201786 |
| *MAGED1* | 0.155855590240957 | 0.012022202 |
| *KIAA1462* | -0.1558271601 | 0.012038009 |
| *WWC2* | 0.155825442995034 | 0.012038964 |
| *FAHD2B* | -0.1558181981 | 0.012042996 |
| *ZNF626* | -0.1558171026 | 0.012043605 |
| *FANCE* | 0.155797563636175 | 0.012054484 |
| *ZNF271* | -0.1557866073 | 0.012060588 |
| *ARHGEF10L* | -0.1557797402 | 0.012064415 |
| *THOC2* | 0.155755663347069 | 0.012077842 |
| *CD9* | -0.1557518948 | 0.012079945 |
| *GPLD1* | -0.1557208672 | 0.01209727 |
| *PSG7* | 0.155695762111098 | 0.012111305 |
| *NT5C* | -0.1556881040 | 0.012115589 |
| *FAM70B* | -0.1556754671 | 0.012122661 |
| *ZNF570* | 0.155672485748452 | 0.01212433 |
| *ZBTB5* | 0.155640789453786 | 0.012142086 |
| *MAGEA9B* | 0.155632858580318 | 0.012146532 |
| *CAPN10* | -0.1556160227 | 0.012155976 |
| *TAF15* | 0.155592553041138 | 0.012169152 |
| *SDCBP2* | -0.1555808745 | 0.012175713 |
| *TNFAIP6* | 0.155549115127163 | 0.012193571 |
| *ABO* | -0.1555447203 | 0.012196044 |
| *CORT* | 0.15553789302543 | 0.012199886 |
| *PCLO* | 0.155503642326298 | 0.01221918 |
| *TMEM202* | 0.155471655017258 | 0.012237223 |
| *SEMA3A* | 0.155447312381191 | 0.012250969 |
| *FMR1* | 0.155443734955762 | 0.012252991 |
| *C11orf30* | 0.155434941838763 | 0.01225796 |
| *COL5A1* | 0.155414115402339 | 0.012269738 |
| *SDS* | 0.15539218768136 | 0.012282149 |
| *SPERT* | 0.155380135432662 | 0.012288975 |
| *C19orf20* | -0.1553736429 | 0.012292654 |
| *CP110* | 0.155360782740771 | 0.012299943 |
| *PAFAH2* | -0.1553552292 | 0.012303093 |
| *CCNI2* | 0.155344283305689 | 0.012309301 |
| *MAST2* | 0.155341930575727 | 0.012310636 |
| *C1orf133* | -0.1553232661 | 0.012321231 |
| *ST13* | -0.1553106069 | 0.012328421 |
| *GPR116* | -0.1552797861 | 0.012345942 |
| *RAB2A* | 0.155264849466097 | 0.012354441 |
| *INE2* | -0.1552617022 | 0.012356233 |
| *TNNI3* | 0.155244231836649 | 0.012366181 |
| *OR5K1* | -0.1552319734 | 0.012373166 |
| *VMAC* | -0.1552294483 | 0.012374606 |
| *ECT2L* | -0.1552043545 | 0.012388916 |
| *PDCD6IP* | 0.155186842920493 | 0.012398912 |
| *MARCKS* | 0.155168834351421 | 0.012409198 |
| *VARS* | 0.155141441310248 | 0.01242486 |
| *UBE2E3* | 0.155124824316568 | 0.012434369 |
| *ARL5C* | -0.1551096476 | 0.012443059 |
| *TRIM33* | 0.155102949327584 | 0.012446896 |
| *AMPH* | 0.155102558939503 | 0.01244712 |
| *LOC100216001* | 0.155068568918368 | 0.012466607 |
| *ZMAT3* | -0.1550627315 | 0.012469957 |
| *SLC1A7* | -0.1550576524 | 0.012472872 |
| *ZNF157* | 0.155044787957659 | 0.012480258 |
| *NKAP* | 0.155028701363144 | 0.012489499 |
| *RAB10* | 0.155016477643196 | 0.012496526 |
| *LOC100271836* | 0.15499046707293 | 0.012511488 |
| *VDAC2* | -0.1549552143 | 0.012531792 |
| *MYL3* | -0.1549171540 | 0.012553746 |
| *TSC22D2* | 0.154905280602079 | 0.012560602 |
| *MPEG1* | -0.1549032723 | 0.012561762 |
| *TMEM186* | -0.1548898668 | 0.012569507 |
| *BRD7P3* | 0.154830171380345 | 0.012604047 |
| *GORAB* | 0.154827145043231 | 0.0126058 |
| *UGT3A2* | 0.154805387500176 | 0.012618411 |
| *ZNF662* | -0.1548050067 | 0.012618632 |
| *RPGRIP1L* | 0.154767416316939 | 0.012640447 |
| *GBGT1* | -0.1547564307 | 0.012646828 |
| *TSN* | 0.154752096626565 | 0.012649347 |
| *FAM22A* | -0.1547458224 | 0.012652994 |
| *CHUK* | 0.15473974324471 | 0.012656528 |
| *MAP1LC3B* | -0.1546917438 | 0.012684463 |
| *FAM19A1* | -0.1546869872 | 0.012687234 |
| *CAMK1D* | 0.1546636147947 | 0.012700858 |
| *FCHO1* | 0.154658726893678 | 0.012703709 |
| *SLU7* | -0.1546463974 | 0.012710903 |
| *UCKL1AS* | 0.154630815470206 | 0.01272 |
| *GDNF* | 0.154619342327418 | 0.012726702 |
| *LY6G5C* | -0.1546138044 | 0.012729938 |
| *CSH2* | 0.154600670111572 | 0.012737615 |
| *ADAL* | 0.154578300974651 | 0.0127507 |
| *LYPLA2* | 0.154572349498006 | 0.012754184 |
| *SLC25A37* | 0.154568446876556 | 0.012756468 |
| *KCNE4* | -0.1545538310 | 0.012765028 |
| *MAP3K2* | 0.154511349856993 | 0.012789935 |
| *PTPN2* | 0.154481147126647 | 0.012807669 |
| *SELV* | 0.154468530024085 | 0.012815084 |
| *AHCTF1* | 0.154459225487139 | 0.012820554 |
| *C1orf56* | -0.1544512524 | 0.012825244 |
| *C1orf230* | -0.1544262806 | 0.01283994 |
| *SLC14A2* | 0.154353743208427 | 0.012882715 |
| *PCCB* | -0.1543523689 | 0.012883527 |
| *FHL1* | -0.1542929841 | 0.01291864 |
| *RPL10* | -0.1542823373 | 0.012924945 |
| *FKBP2* | -0.1542618777 | 0.012937067 |
| *FBXO24* | 0.154251911263349 | 0.012942976 |
| *PKNOX2* | -0.1542496250 | 0.012944331 |
| *WHSC1L1* | 0.154188577166855 | 0.01298058 |
| *LOC200030* | 0.154159274906017 | 0.01299801 |
| *PPIL4* | 0.154133280807738 | 0.01301349 |
| *GPT* | -0.1541008168 | 0.013032845 |
| *PGLYRP3* | -0.1540961864 | 0.013035608 |
| *DERA* | 0.154088868748846 | 0.013039975 |
| *WDR13* | -0.1540602026 | 0.013057096 |
| *IFNA2* | 0.154059382816739 | 0.013057585 |
| *EP400NL* | 0.154029904624123 | 0.013075212 |
| *ARFGEF2* | 0.154022390796828 | 0.013079708 |
| *GATA2* | -0.1540116248 | 0.013086153 |
| *SF3A1* | 0.153950502960114 | 0.013122794 |
| *IRX4* | 0.153941921455428 | 0.013127946 |
| *B9D1* | -0.1539225621 | 0.013139575 |
| *PTPRB* | -0.1538808638 | 0.013164652 |
| *SLC26A11* | -0.1538790796 | 0.013165726 |
| *TOMM20* | -0.1538673034 | 0.013172816 |
| *TMPRSS15* | 0.153840574716379 | 0.013188922 |
| *HBB* | -0.1538301744 | 0.013195193 |
| *EFHA1* | 0.153794514512066 | 0.013216716 |
| *NTRK1* | 0.153786209777099 | 0.013221733 |
| *MFAP2* | 0.15378452726012 | 0.013222749 |
| *PPIA* | 0.153760762002857 | 0.013237116 |
| *FZR1* | 0.153740529242769 | 0.013249358 |
| *ZNF34* | -0.1537127580 | 0.013266178 |
| *TADA2A* | 0.153695899230213 | 0.013276397 |
| *PRPF4B* | 0.153649816172627 | 0.013304367 |
| *FAM120C* | 0.153644556176627 | 0.013307563 |
| *FAM104A* | 0.153614446855307 | 0.01332587 |
| *TTYH1* | -0.1535723785 | 0.013351485 |
| *DGCR11* | 0.153569563191016 | 0.013353201 |
| *DHX8* | 0.153531109782356 | 0.013376655 |
| *FAM149B1* | -0.1535293206 | 0.013377747 |
| *TMEM59L* | -0.1535207468 | 0.013382982 |
| *CKB* | -0.1534958481 | 0.013398195 |
| *PTPN12* | 0.153486142977946 | 0.013404128 |
| *HRC* | -0.1534664405 | 0.013416181 |
| *PPP1R3G* | 0.153447410008713 | 0.013427832 |
| *SETD8* | 0.153440386008081 | 0.013432135 |
| *EDN1* | -0.1534080115 | 0.013451982 |
| *C12orf61* | -0.1533987746 | 0.013457649 |
| *BCAS2* | 0.153377904309034 | 0.013470462 |
| *NPRL3* | -0.1533565255 | 0.013483598 |
| *CCDC83* | 0.153338602597309 | 0.013494619 |
| *FBXO3* | -0.1532844677 | 0.013527955 |
| *DRG2* | -0.1532693001 | 0.013537309 |
| *FLJ42393* | -0.1532616195 | 0.013542047 |
| *ABCB11* | 0.153233478963925 | 0.013559421 |
| *C9orf78* | -0.1532327411 | 0.013559876 |
| *KRTAP5-8* | -0.1532245687 | 0.013564926 |
| *MYOG* | 0.153224495229967 | 0.013564971 |
| *ZNF182* | 0.153210561249872 | 0.013573584 |
| *DEGS1* | -0.1531870581 | 0.013588123 |
| *FOS* | -0.1531869527 | 0.013588188 |
| *FGF2* | -0.1531788196 | 0.013593223 |
| *FAM110C* | -0.1531339344 | 0.013621035 |
| *WSCD1* | -0.1531214288 | 0.013628793 |
| *UXS1* | 0.153079258852225 | 0.013654982 |
| *NLGN4Y* | -0.1530670769 | 0.013662556 |
| *AASDHPPT* | 0.153061370202936 | 0.013666105 |
| *NEIL1* | -0.1530595618 | 0.01366723 |
| *UGCG* | 0.153021584801071 | 0.013690871 |
| *CTSA* | -0.1530063713 | 0.013700352 |
| *GLG1* | -0.1529932807 | 0.013708514 |
| *PNMAL2* | -0.1529923608 | 0.013709088 |
| *TOR1AIP2* | 0.152982228080833 | 0.013715409 |
| *LRRC1* | 0.152973657165917 | 0.013720758 |
| *SGSM3* | -0.1529733602 | 0.013720943 |
| *C17orf46* | 0.152954257262212 | 0.013732872 |
| *PSMA6* | 0.152945560639604 | 0.013738305 |
| *MOV10* | 0.152907408101297 | 0.013762164 |
| *OLIG3* | 0.152907070028764 | 0.013762376 |
| *ELP3* | -0.1529006433 | 0.013766399 |
| *IL1RN* | 0.15289469141303 | 0.013770125 |
| *C21orf82* | -0.1528931027 | 0.01377112 |
| *WDR49* | -0.1528888092 | 0.013773809 |
| *GPR98* | 0.152863403344838 | 0.013789729 |
| *RASGEF1B* | 0.152855122144802 | 0.013794921 |
| *PDZD11* | 0.152849398467999 | 0.013798511 |
| *ASPN* | -0.1528371806 | 0.013806177 |
| *PLS1* | 0.152813865451414 | 0.013820816 |
| *POU5F1B* | 0.152803031096697 | 0.013827624 |
| *ODF2L* | 0.152788270199695 | 0.013836903 |
| *PRDM14* | 0.152773986523592 | 0.013845887 |
| *FLJ33360* | -0.1527713942 | 0.013847519 |
| *EPHB6* | -0.1527692397 | 0.013848874 |
| *DNAJC28* | -0.1527376010 | 0.013868797 |
| *TBPL1* | 0.152708684291691 | 0.013887028 |
| *CSNK1G2* | 0.152699358916273 | 0.013892911 |
| *TRPC2* | -0.1526973250 | 0.013894195 |
| *GRIA3* | -0.1526939952 | 0.013896297 |
| *STRADA* | -0.1526707646 | 0.013910966 |
| *KRT78* | 0.152666906350586 | 0.013913404 |
| *ACAD10* | -0.1526462712 | 0.013926448 |
| *TP53BP1* | 0.152632792186846 | 0.013934974 |
| *HNRNPCL1* | -0.1526229804 | 0.013941184 |
| *GABRR3* | 0.152599265760595 | 0.013956202 |
| *MLPH* | -0.1525916545 | 0.013961025 |
| *THAP11* | -0.1525678110 | 0.013976143 |
| *OTUD7A* | -0.1525653385 | 0.013977712 |
| *GSDMD* | -0.1525510633 | 0.013986771 |
| *RBX1* | 0.152510099346839 | 0.014012796 |
| *C21orf125* | 0.152503749830928 | 0.014016834 |
| *XKR8* | 0.152464476848026 | 0.014041831 |
| *OR5C1* | -0.1524600389 | 0.014044658 |
| *C8ORFK29* | 0.15245225359502 | 0.014049618 |
| *C11orf17* | -0.1524202733 | 0.014070012 |
| *SLIT3* | -0.1524108240 | 0.014076043 |
| *PAMR1* | -0.1524101966 | 0.014076444 |
| *RSPH3* | 0.15240314097777 | 0.014080948 |
| *GBAP1* | -0.1523727795 | 0.014100347 |
| *IL25* | -0.1523651289 | 0.014105239 |
| *OGFOD2* | -0.1523305152 | 0.01412739 |
| *SLC9A4* | 0.152273457667991 | 0.014163971 |
| *ALPK2* | 0.152252219763777 | 0.014177608 |
| *SOX9* | 0.152239915897761 | 0.014185514 |
| *MGAT5* | 0.152209214996426 | 0.014205257 |
| *ASNS* | 0.152183292654959 | 0.014221946 |
| *ALG9* | -0.1521466887 | 0.014245542 |
| *FER* | 0.152135498363459 | 0.014252762 |
| *TIMM8B* | -0.1521046769 | 0.014272666 |
| *SH3RF3* | -0.1520920171 | 0.014280848 |
| *PLOD1* | 0.152071515547133 | 0.014294108 |
| *CYB5R2* | -0.1520619952 | 0.014300268 |
| *ACPT* | 0.152015117390398 | 0.014330639 |
| *BOD1L* | 0.15196210042797 | 0.014365055 |
| *WDR53* | 0.151952709406672 | 0.014371158 |
| *PRR5L* | 0.151952159521811 | 0.014371516 |
| *ZNF469* | 0.151947391617258 | 0.014374616 |
| *P2RX6* | -0.1519322563 | 0.01438446 |
| *C3orf34* | 0.151920783502701 | 0.014391926 |
| *C19orf2* | 0.151904589256834 | 0.01440247 |
| *TTC29* | 0.151875871411404 | 0.014421185 |
| *MGC23270* | 0.151862023006849 | 0.014430217 |
| *CTXN2* | 0.151840478907794 | 0.014444279 |
| *SLC12A5* | 0.151831876175601 | 0.014449897 |
| *C6orf47* | -0.1518092201 | 0.014464702 |
| *VEPH1* | 0.151801635242602 | 0.014469662 |
| *COQ3* | 0.151746832099596 | 0.014505541 |
| *TMEM30A* | -0.1517022582 | 0.01453478 |
| *WDR41* | 0.151689452671333 | 0.01454319 |
| *RPF1* | 0.151680156150451 | 0.014549298 |
| *PRAMEF10* | 0.151655897515381 | 0.014565247 |
| *ACTR5* | 0.151628489545534 | 0.014583284 |
| *GUK1* | -0.1516152407 | 0.014592011 |
| *NCKIPSD* | -0.1515792314 | 0.014615751 |
| *UNC13D* | -0.1515785213 | 0.01461622 |
| *CYP3A5* | -0.1515574229 | 0.014630146 |
| *SLC38A11* | -0.1515399830 | 0.014641666 |
| *LOC642852* | 0.151501119223415 | 0.014667366 |
| *SNHG12* | 0.151481534138287 | 0.014680333 |
| *ITIH3* | -0.1514800446 | 0.014681319 |
| *MYL7* | -0.1514707769 | 0.014687459 |
| *SCARF1* | -0.1514701319 | 0.014687886 |
| *HIP1* | 0.151455364732097 | 0.014697674 |
| *SNAP47* | -0.1514159133 | 0.014723851 |
| *OR1D2* | -0.1514090613 | 0.014728401 |
| *RAB11B* | -0.1513898315 | 0.014741179 |
| *TRIM27* | 0.151380784155609 | 0.014747194 |
| *GTSF1L* | 0.15136652040998 | 0.014756681 |
| *POLD3* | 0.151344922417251 | 0.014771057 |
| *FAM118A* | -0.1513439811 | 0.014771684 |
| *FAM25B* | -0.1513139885 | 0.014791669 |
| *LRTM1* | 0.151303947438698 | 0.014798365 |
| *ZNF443* | 0.151275721112258 | 0.014817202 |
| *OR6K3* | -0.1512624949 | 0.014826035 |
| *C12orf68* | -0.1512591677 | 0.014828258 |
| *ZNF543* | 0.151241847204734 | 0.014839835 |
| *ADAMTS7* | 0.151184493793789 | 0.014878226 |
| *LARS* | 0.151178391659147 | 0.014882316 |
| *MCEE* | -0.1511723350 | 0.014886376 |
| *ZNF140* | -0.1511586260 | 0.01489557 |
| *GJD3* | -0.1510507660 | 0.014968078 |
| *C16orf80* | 0.151045124951793 | 0.014971878 |
| *LOC158376* | -0.1510417059 | 0.014974182 |
| *RBM23* | 0.151016808496078 | 0.014990969 |
| *GOLPH3* | 0.151013649626829 | 0.0149931 |
| *ZNF708* | 0.150981851824184 | 0.015014566 |
| *MLH1* | 0.150972601201041 | 0.015020816 |
| *BAI3* | -0.1509610110 | 0.01502865 |
| *ATG4D* | 0.150931003195542 | 0.015048949 |
| *RRAGC* | 0.15092162791357 | 0.015055296 |
| *PQLC1* | -0.1509200435 | 0.015056369 |
| *EIF1AX* | 0.150913150602374 | 0.015061037 |
| *ITPK1* | -0.1508954770 | 0.015073012 |
| *CAV3* | 0.150884913121906 | 0.015080174 |
| *VKORC1* | -0.1508692226 | 0.015090817 |
| *VDR* | 0.150862209415167 | 0.015095576 |
| *NXF3* | 0.150842586278561 | 0.0151089 |
| *KIT* | -0.1508286197 | 0.015118389 |
| *RAET1G* | 0.150822906247119 | 0.015122272 |
| *CSNK2A1* | 0.15078430461558 | 0.015148531 |
| *APOC2* | 0.150765292580326 | 0.015161479 |
| *LOC285205* | 0.150757487984566 | 0.015166797 |
| *TUBB6* | 0.150752055721755 | 0.015170499 |
| *COPE* | 0.150743293985373 | 0.015176473 |
| *ZNF519* | 0.150736871239107 | 0.015180853 |
| *GCG* | 0.150726353697618 | 0.015188028 |
| *SLC2A12* | -0.1507200717 | 0.015192315 |
| *GNG8* | -0.1507085634 | 0.015200171 |
| *C1QL4* | 0.150705256025765 | 0.01520243 |
| *SAC3D1* | 0.150701865038116 | 0.015204745 |
| *XPNPEP3* | 0.150692666781597 | 0.015211029 |
| *AP1G1* | 0.150692012162917 | 0.015211476 |
| *TMEM42* | -0.1506812319 | 0.015218843 |
| *TBC1D24* | 0.150666223252855 | 0.015229106 |
| *LOC643387* | 0.150662199458247 | 0.015231858 |
| *PCDHGB8P* | 0.150647849348993 | 0.015241677 |
| *C2orf64* | -0.1506369944 | 0.015249108 |
| *HTT* | 0.150626609919973 | 0.01525622 |
| *ATP8B1* | -0.1506102625 | 0.015267422 |
| *CYP4B1* | -0.1506014371 | 0.015273472 |
| *LIMS3-LOC440895* | -0.1505886607 | 0.015282235 |
| *NKX2-2* | 0.150577602058904 | 0.015289824 |
| *AKAP1* | -0.1505567457 | 0.015304144 |
| *CDK5RAP2* | 0.150550700431247 | 0.015308297 |
| *EXOC4* | -0.1505466008 | 0.015311114 |
| *S100A2* | 0.150529873223444 | 0.015322612 |
| *SLC25A23* | -0.1505290098 | 0.015323206 |
| *SPRYD4* | -0.1505230697 | 0.015327291 |
| *C3orf77* | 0.150516189791624 | 0.015332024 |
| *C1orf9* | 0.150514418697788 | 0.015333242 |
| *WASH3P* | -0.1505067840 | 0.015338496 |
| *C20orf85* | 0.150501315930817 | 0.01534226 |
| *CYP4Z1* | -0.1504978802 | 0.015344625 |
| *EPSTI1* | 0.150493460161937 | 0.015347669 |
| *LOC731789* | 0.150488349329954 | 0.015351188 |
| *LYG1* | 0.150444729972726 | 0.015381257 |
| *NUP210* | 0.150440923642934 | 0.015383883 |
| *MRPL37* | 0.150437272918312 | 0.015386402 |
| *CCDC109B* | 0.150431337873493 | 0.015390499 |
| *FBXO48* | 0.150420743536484 | 0.015397813 |
| *IGFALS* | -0.1503982992 | 0.01541332 |
| *EBI3* | -0.1503630217 | 0.01543772 |
| *LIN28A* | 0.15033291581191 | 0.01545857 |
| *RNF187* | -0.1503294669 | 0.01546096 |
| *LOC401093* | -0.1503049494 | 0.01547796 |
| *LOC647121* | 0.15028414835415 | 0.015492396 |
| *PIM1* | 0.150280166251695 | 0.015495161 |
| *ZNF776* | 0.150278975239453 | 0.015495988 |
| *ITGB6* | 0.150262446973652 | 0.015507469 |
| *C1orf150* | -0.1502160018 | 0.015539772 |
| *PPP6C* | 0.150184811123119 | 0.015561499 |
| *LOC91149* | 0.150169895849521 | 0.015571898 |
| *C9orf85* | 0.150168846925775 | 0.015572629 |
| *TMEM184B* | 0.150160105530287 | 0.015578727 |
| *IVNS1ABP* | 0.150157507333436 | 0.015580539 |
| *ZNF275* | 0.150148743178077 | 0.015586656 |
| *LANCL2* | 0.150147454857891 | 0.015587555 |
| *CNKSR1* | 0.150129948301752 | 0.015599779 |
| *MYLPF* | 0.150124300552993 | 0.015603724 |
| *NARG2* | 0.150113985073943 | 0.015610933 |
| *C22orf42* | 0.150093868349613 | 0.015624998 |
| *FLJ39609* | -0.1500922405 | 0.015626137 |
| *COX4I1* | -0.1500632996 | 0.015646393 |
| *CASC2* | -0.1500632302 | 0.015646442 |
| *CA7* | 0.150052797243051 | 0.01565375 |
| *ANKRD54* | 0.150047038392493 | 0.015657785 |
| *MIER3* | 0.150011006658934 | 0.015683053 |
| *RCOR3* | -0.1499440072 | 0.015730131 |
| *OST4* | -0.1499233157 | 0.015744696 |
| *MYO1C* | -0.1499147802 | 0.015750707 |
| *LMO4* | 0.149881523408747 | 0.015774149 |
| *CAPN5* | -0.1498769745 | 0.015777357 |
| *CEND1* | -0.1498579671 | 0.015790771 |
| *EFHD2* | 0.149851940330073 | 0.015795026 |
| *SPEG* | -0.1498321229 | 0.015809025 |
| *PRR15* | -0.1498303163 | 0.015810302 |
| *TTPAL* | 0.149802005310545 | 0.015830321 |
| *SLC1A4* | 0.149801370559683 | 0.01583077 |
| *EFNA2* | 0.149761821912905 | 0.015858774 |
| *TMEM57* | 0.14975789902877 | 0.015861554 |
| *RUNDC1* | -0.1497286040 | 0.015882328 |
| *EIF4H* | 0.149684709338978 | 0.0159135 |
| *TAS2R9* | 0.149663926826926 | 0.015928278 |
| *CACNG7* | 0.149655843477629 | 0.015934028 |
| *GRK7* | 0.149653566043489 | 0.015935649 |
| *FNBP1L* | 0.149647518668299 | 0.015939953 |
| *SND1* | 0.149634077483097 | 0.015949523 |
| *CMTM2* | 0.149632220027421 | 0.015950846 |
| *MRPL24* | -0.1496241547 | 0.015956591 |
| *COX8C* | -0.1496176255 | 0.015961243 |
| *LOC257358* | -0.1496162737 | 0.015962207 |
| *GLB1L* | -0.1496156658 | 0.01596264 |
| *SMPD2* | -0.1495936031 | 0.01597837 |
| *PRUNE2* | -0.1495743698 | 0.015992094 |
| *MDN1* | 0.149536043364787 | 0.016019473 |
| *ACAD9* | -0.1495317307 | 0.016022557 |
| *ENTPD4* | 0.149503944813925 | 0.016042435 |
| *IFNE* | 0.149483779509314 | 0.016056875 |
| *LOC116437* | 0.149464383614057 | 0.016070774 |
| *S100G* | -0.1494613721 | 0.016072933 |
| *TTLL6* | 0.149448284175131 | 0.01608232 |
| *PAGE3* | 0.149442540819199 | 0.01608644 |
| *NRF1* | 0.149432784478809 | 0.016093442 |
| *ZNF467* | -0.1494312095 | 0.016094572 |
| *ZFAND6* | 0.14941629301704 | 0.016105283 |
| *AHNAK2* | -0.1494051313 | 0.016113301 |
| *LOC284009* | 0.149398564444482 | 0.016118021 |
| *CENPC1* | 0.149388249936334 | 0.016125435 |
| *FADS2* | 0.149379035366454 | 0.016132062 |
| *SMARCAL1* | -0.1493666583 | 0.016140967 |
| *ABLIM3* | -0.1493581265 | 0.016147108 |
| *RNF17* | 0.14934319887923 | 0.016157857 |
| *C14orf132* | -0.1493000322 | 0.016188976 |
| *SPDYE1* | 0.149298378930334 | 0.016190168 |
| *ZNF439* | 0.149290054947744 | 0.016196176 |
| *BAGE2* | 0.149273443177153 | 0.01620817 |
| *MRPL16* | -0.1492364207 | 0.016234928 |
| *DAOA* | 0.149215684397334 | 0.016249933 |
| *PIGL* | 0.149197103857882 | 0.016263388 |
| *WSB2* | 0.149196616554206 | 0.016263741 |
| *TMEM101* | -0.1491827544 | 0.016273785 |
| *SNORA39* | 0.149153731730469 | 0.016294833 |
| *MCOLN1* | -0.1491273549 | 0.016313982 |
| *GPD1L* | -0.1490841645 | 0.016345381 |
| *YME1L1* | 0.149048402872683 | 0.016371419 |
| *PRLH* | -0.1490413176 | 0.016376582 |
| *RAB8B* | 0.14902277657425 | 0.016390099 |
| *CPLX3* | 0.148988500675799 | 0.016415114 |
| *C12orf69* | -0.1489537253 | 0.016440528 |
| *MFRP* | -0.1489487382 | 0.016444175 |
| *GALNTL2* | -0.1489175907 | 0.016466971 |
| *TMEM132E* | -0.1489109449 | 0.016471839 |
| *TSPAN18* | -0.1489012739 | 0.016478924 |
| *NACA2* | -0.1488992232 | 0.016480427 |
| *SHANK3* | -0.1488526021 | 0.016514623 |
| *LIN52* | 0.148846525101161 | 0.016519085 |
| *MRPS21* | -0.1488407669 | 0.016523314 |
| *FLNA* | -0.1488331514 | 0.016528909 |
| *LBH* | 0.14880030875776 | 0.016553054 |
| *LOC728392* | -0.1487997693 | 0.016553451 |
| *GALNT13* | -0.1487876657 | 0.016562358 |
| *NSUN4* | 0.1487815525681 | 0.016566857 |
| *XYLT2* | -0.1487313042 | 0.016603886 |
| *DSCR6* | 0.14871736639291 | 0.01661417 |
| *C1orf93* | 0.148716321782946 | 0.016614941 |
| *ATF7IP2* | -0.1487044141 | 0.016623731 |
| *MRPL48* | 0.148702211457238 | 0.016625358 |
| *CHD7* | 0.14869763693166 | 0.016628736 |
| *RPL30* | -0.1486928283 | 0.016632288 |
| *ATR* | 0.148620351092359 | 0.016685904 |
| *SOX18* | -0.1486193940 | 0.016686613 |
| *PTPLA* | -0.1485820462 | 0.016714302 |
| *CHMP6* | -0.1485784373 | 0.016716979 |
| *TTTY15* | -0.1485714805 | 0.016722142 |
| *MAGEE2* | -0.1485555826 | 0.016733945 |
| *CS* | 0.148554904697722 | 0.016734449 |
| *TMEM64* | 0.148536062142966 | 0.016748448 |
| *KIAA1522* | 0.14852573989541 | 0.016756121 |
| *FILIP1L* | -0.1485210844 | 0.016759583 |
| *PPEF2* | -0.1484319035 | 0.016826018 |
| *NCDN* | -0.1484241322 | 0.016831818 |
| *LATS1* | 0.14842234049137 | 0.016833156 |
| *FAM45B* | 0.148357624918954 | 0.016881527 |
| *S100A6* | -0.1483348201 | 0.016898601 |
| *SEC11C* | -0.1483099134 | 0.016917266 |
| *EPB41L2* | 0.148303904186921 | 0.016921773 |
| *AKAP13* | 0.148294482720033 | 0.016928839 |
| *MYO9B* | 0.148291537914765 | 0.016931049 |
| *TMEM109* | -0.1482734360 | 0.016944635 |
| *MCOLN3* | 0.148262153850033 | 0.016953108 |
| *DYNC1H1* | 0.148258296189288 | 0.016956006 |
| *TAL1* | -0.1482573760 | 0.016956697 |
| *GNE* | 0.148249599459495 | 0.01696254 |
| *SLC22A13* | 0.148229766951525 | 0.016977451 |
| *LOC100271722* | -0.1482263674 | 0.016980008 |
| *FLJ44635* | -0.1482176304 | 0.01698658 |
| *C20orf117* | 0.148186831317633 | 0.017009769 |
| *PLCG2* | -0.1481725907 | 0.0170205 |
| *FAM195B* | -0.1481442194 | 0.017041897 |
| *LOC100128842* | 0.148110382800547 | 0.017067446 |
| *ZNF581* | -0.1480703687 | 0.017097702 |
| *XPC* | -0.1480650833 | 0.017101702 |
| *IL21* | 0.148050676648103 | 0.01711261 |
| *PMS2L4* | -0.1480082700 | 0.017144751 |
| *ZNF396* | -0.1479943600 | 0.017155305 |
| *EIF3H* | -0.1479651510 | 0.017177486 |
| *RHPN2* | 0.147961614899792 | 0.017180173 |
| *C8orf77* | -0.1479492200 | 0.017189594 |
| *ANKRD56* | 0.147937997184253 | 0.017198129 |
| *UNC5B* | 0.147935860247541 | 0.017199754 |
| *XIRP1* | 0.147922145195279 | 0.01721019 |
| *PASD1* | 0.147906661422234 | 0.017221977 |
| *RIPK4* | 0.147903311608526 | 0.017224529 |
| *C16orf73* | 0.147901903955619 | 0.017225601 |
| *GRPR* | 0.147879501016333 | 0.017242672 |
| *CLEC5A* | 0.147878421563409 | 0.017243495 |
| *ZNF254* | 0.147876912967315 | 0.017244645 |
| *EFNA5* | 0.147875293529274 | 0.017245879 |
| *PAN2* | 0.147869467144535 | 0.017250322 |
| *CLN3* | -0.1478519008 | 0.017263723 |
| *CROT* | -0.1478423353 | 0.017271024 |
| *ZFY* | -0.1478191417 | 0.017288739 |
| *EID3* | 0.147798349310354 | 0.017304633 |
| *LOC728024* | 0.147796265069824 | 0.017306227 |
| *GPX7* | 0.147786027678233 | 0.017314058 |
| *HLA-E* | -0.1477700512 | 0.017326285 |
| *PROX2* | 0.147769552730884 | 0.017326666 |
| *ALDH3B1* | -0.1477523069 | 0.017339873 |
| *CCDC121* | -0.1477412160 | 0.017348372 |
| *MAPK13* | 0.147726691084072 | 0.017359507 |
| *NDUFV1* | -0.1477057867 | 0.017375543 |
| *GOLM1* | 0.147669057609546 | 0.017403751 |
| *NFIB* | -0.1476602891 | 0.017410491 |
| *GHRLOS* | 0.147643896641587 | 0.017423097 |
| *ZNF596* | -0.1476376404 | 0.01742791 |
| *ACAP2* | 0.14763732269597 | 0.017428155 |
| *FLJ39739* | 0.14762312025179 | 0.017439086 |
| *DDAH2* | -0.1475871284 | 0.017466815 |
| *GON4L* | 0.147580334638437 | 0.017472054 |
| *IQCB1* | 0.147575421994239 | 0.017475843 |
| *ADAM19* | 0.147566751017354 | 0.017482532 |
| *TACC1* | -0.1475452511 | 0.017499127 |
| *SFRS5* | -0.1475254254 | 0.017514442 |
| *KRR1* | 0.147517763131113 | 0.017520365 |
| *TTTY14* | -0.1474433108 | 0.017578 |
| *FASTKD2* | -0.1474231834 | 0.01759361 |
| *NAA38* | 0.147410198278464 | 0.017603687 |
| *ZNF674* | 0.14739942946539 | 0.017612047 |
| *ALX4* | 0.147370680538242 | 0.017634384 |
| *NOS3* | -0.1473706029 | 0.017634445 |
| *PGRMC1* | 0.147353023706805 | 0.017648115 |
| *DCUN1D3* | -0.1473424930 | 0.017656309 |
| *ZMYM4* | 0.147342015699612 | 0.017656681 |
| *MACROD1* | -0.1473063053 | 0.017684492 |
| *MEFV* | 0.147294911132404 | 0.017693373 |
| *EVC2* | 0.147292080056049 | 0.017695581 |
| *EVPLL* | 0.147211606396218 | 0.017758427 |
| *FUT1* | -0.1472070082 | 0.017762024 |
| *TXNRD3IT1* | -0.1471784639 | 0.017784367 |
| *RELB* | -0.1471475971 | 0.017808555 |
| *C9orf106* | -0.1471456297 | 0.017810097 |
| *C6orf147* | 0.147131773190279 | 0.017820966 |
| *NCRNA00157* | 0.147106399581353 | 0.017840883 |
| *TTC18* | -0.1470761690 | 0.017864637 |
| *C6orf223* | 0.14702044036159 | 0.0179085 |
| *EYA4* | 0.147017324847777 | 0.017910955 |
| *LOC388796* | 0.146988206032849 | 0.017933914 |
| *ASTL* | 0.14698307136503 | 0.017937965 |
| *RCE1* | 0.14696175533108 | 0.017954791 |
| *DALRD3* | -0.1469289052 | 0.017980749 |
| *NCOR2* | 0.146924913770473 | 0.017983905 |
| *PRSS53* | -0.1468598733 | 0.018035404 |
| *SLC25A32* | 0.146852227746614 | 0.018041466 |
| *AKR1C2* | -0.1468254406 | 0.018062719 |
| *PCDHGA1* | 0.146798394009909 | 0.0180842 |
| *RABGAP1L* | -0.1467840602 | 0.018095594 |
| *RAB11FIP1* | 0.146769169457384 | 0.018107437 |
| *PLXNA4* | -0.1467590508 | 0.018115488 |
| *SLC22A2* | -0.1467564211 | 0.018117581 |
| *KIF19* | -0.1467526685 | 0.018120568 |
| *FMO5* | -0.1467514527 | 0.018121536 |
| *C2orf72* | 0.146698951178665 | 0.018163373 |
| *MKS1* | 0.146694092854071 | 0.018167248 |
| *FAM172A* | -0.1466850435 | 0.01817447 |
| *C6orf164* | -0.1466630165 | 0.018192057 |
| *RFXAP* | 0.146638819030311 | 0.018211394 |
| *LRP5L* | 0.146617756055279 | 0.018228241 |
| *PISD* | -0.1466150225 | 0.018230428 |
| *FAM108A1* | -0.1466098835 | 0.018234541 |
| *TAS2R1* | 0.146562677310318 | 0.018272358 |
| *SCN8A* | 0.146555229602641 | 0.018278331 |
| *GPBP1* | 0.146533079721003 | 0.018296104 |
| *PSMD6* | 0.146522671139669 | 0.018304461 |
| *EBNA1BP2* | 0.146514764434348 | 0.018310812 |
| *CUL5* | -0.1465111183 | 0.018313741 |
| *MYSM1* | 0.146494291700162 | 0.018327264 |
| *FUZ* | -0.1464836270 | 0.01833584 |
| *VGLL2* | 0.146477241461344 | 0.018340976 |
| *CDY2B* | 0.14647075879176 | 0.018346192 |
| *KCNQ3* | 0.146467937807144 | 0.018348462 |
| *PARS2* | 0.14644455178868 | 0.01836729 |
| *WIT1* | -0.1464314195 | 0.01837787 |
| *DPYSL5* | 0.146428539896179 | 0.018380191 |
| *MYBPC2* | 0.146426689469165 | 0.018381682 |
| *TRIP6* | -0.1464251630 | 0.018382913 |
| *C12orf54* | -0.1463278406 | 0.018461506 |
| *SULF1* | -0.1463239573 | 0.018464648 |
| *TNN* | 0.146321584508375 | 0.018466568 |
| *TECPR1* | 0.14632027281603 | 0.01846763 |
| *IL26* | 0.14630714408624 | 0.018478257 |
| *GOLGB1* | -0.1462998301 | 0.01848418 |
| *ZNF843* | -0.1462897917 | 0.018492312 |
| *SLC22A12* | -0.1462364075 | 0.01853561 |
| *WDR16* | -0.1462183634 | 0.018550264 |
| *GRB14* | -0.1462140190 | 0.018553794 |
| *SENP5* | 0.146210134691279 | 0.018556951 |
| *HNRNPC* | 0.146208327651268 | 0.018558419 |
| *THRAP3* | 0.146195029166631 | 0.01856923 |
| *REST* | 0.146189714210896 | 0.018573553 |
| *ILVBL* | -0.1461725512 | 0.018587516 |
| *RNF126P1* | -0.1461634823 | 0.018594898 |
| *LCE3D* | 0.146155700867833 | 0.018601235 |
| *SNX31* | -0.1461140829 | 0.018635154 |
| *FAM182B* | -0.1460904332 | 0.018654453 |
| *SIPA1L1* | 0.146060602191003 | 0.018678822 |
| *COX19* | 0.146045951429306 | 0.018690799 |
| *LRFN5* | 0.146034441446084 | 0.018700214 |
| *SYT6* | 0.146022541862966 | 0.018709952 |
| *ANKRD35* | -0.1460217202 | 0.018710625 |
| *UNC50* | -0.1460037610 | 0.01872533 |
| *PPARD* | 0.145988891557814 | 0.018737513 |
| *NACAP1* | -0.1459764852 | 0.018747683 |
| *NDRG3* | -0.1459605646 | 0.018760742 |
| *UBE2Q1* | 0.145959044599246 | 0.018761989 |
| *KRTAP8-1* | 0.145944668927697 | 0.018773787 |
| *CDH15* | 0.145944442287265 | 0.018773973 |
| *TANC1* | -0.1458999446 | 0.018810535 |
| *CXorf40B* | 0.14589379777436 | 0.01881559 |
| *LRRC48* | -0.1458712723 | 0.018834126 |
| *MVK* | 0.145849056758501 | 0.018852423 |
| *MRO* | -0.1458485216 | 0.018852863 |
| *SYCP1* | 0.145832373895068 | 0.018866173 |
| *ALS2CR8* | -0.1458308251 | 0.018867449 |
| *ZNF284* | 0.145816059271479 | 0.018879627 |
| *PRPF19* | 0.145770732542923 | 0.018917053 |
| *KCNA6* | -0.1457389518 | 0.018943332 |
| *ALDH9A1* | -0.1457237258 | 0.018955934 |
| *GAPVD1* | 0.145719544270824 | 0.018959396 |
| *MBNL1* | -0.1456809120 | 0.018991407 |
| *SP8* | 0.145671601839996 | 0.018999128 |
| *LNX1* | 0.145651861122182 | 0.019015509 |
| *ANKRD31* | 0.14564699230239 | 0.019019551 |
| *PRR19* | 0.145634239704917 | 0.019030142 |
| *WDR8* | 0.145611769946338 | 0.019048815 |
| *MED1* | 0.145566299977049 | 0.019086651 |
| *TMEM20* | 0.145566213370193 | 0.019086724 |
| *PCDHB8* | 0.145549288660007 | 0.019100824 |
| *WNT4* | -0.1455449541 | 0.019104436 |
| *ROBO3* | -0.1455343112 | 0.019113309 |
| *ALG3* | 0.145517119070778 | 0.019127649 |
| *FAM127C* | -0.1454160622 | 0.019212131 |
| *MAP6D1* | 0.145403921721705 | 0.019222302 |
| *LOC100286793* | 0.14540138084369 | 0.019224431 |
| *MGC16121* | 0.145379175753129 | 0.019243048 |
| *ARMC5* | -0.1453738615 | 0.019247506 |
| *KIAA1239* | 0.145343538156787 | 0.019272959 |
| *DDX10* | 0.145327399866886 | 0.019286518 |
| *IQGAP1* | 0.145311585675042 | 0.019299812 |
| *SIPA1* | -0.1453114819 | 0.019299899 |
| *UBE2CBP* | 0.145291312143917 | 0.019316867 |
| *TAP1* | 0.14528983538306 | 0.019318109 |
| *SPAST* | 0.145272329826831 | 0.019332847 |
| *DUSP12* | 0.145263709211952 | 0.019340108 |
| *MAFK* | -0.1452514201 | 0.019350463 |
| *RRBP1* | 0.145247815831115 | 0.019353501 |
| *ZSCAN2* | 0.145243963836389 | 0.019356748 |
| *ANKRD53* | -0.1452363147 | 0.019363198 |
| *PHF16* | 0.145230229054292 | 0.019368331 |
| *RPS29* | -0.1451736659 | 0.019416092 |
| *TCTE1* | 0.145172595082048 | 0.019416998 |
| *POLR3D* | 0.145138075201841 | 0.019446198 |
| *ERC2* | 0.145124889729136 | 0.019457361 |
| *UBE2J1* | 0.145111232368767 | 0.01946893 |
| *SVOPL* | -0.1450942102 | 0.019483358 |
| *RNF144A* | 0.145078020323374 | 0.019497088 |
| *KCNA4* | -0.1450576972 | 0.019514336 |
| *CABLES1* | -0.1450332530 | 0.0195351 |
| *TGM2* | -0.1450328333 | 0.019535456 |
| *WNT5B* | 0.14503194076208 | 0.019536215 |
| *NFKBIE* | 0.145029033815474 | 0.019538685 |
| *RNF145* | 0.145027278762903 | 0.019540177 |
| *PIK3CA* | 0.145006715805936 | 0.019557662 |
| *C14orf86* | -0.1450010490 | 0.019562483 |
| *EYS* | 0.144972925160278 | 0.019586425 |
| *ADAMTS16* | 0.144962836721398 | 0.019595019 |
| *MYB* | 0.144954875332107 | 0.019601804 |
| *USP45* | 0.144924415105754 | 0.019627781 |
| *SH3BGR* | -0.1449063969 | 0.019643161 |
| *TRIP11* | 0.144894760485137 | 0.019653099 |
| *C20orf177* | 0.144883751568237 | 0.019662506 |
| *NUDC* | 0.144877311781555 | 0.01966801 |
| *SENP2* | 0.144874920279059 | 0.019670054 |
| *COQ9* | -0.1448701013 | 0.019674174 |
| *FAM102A* | -0.1448089028 | 0.019726563 |
| *SMCHD1* | 0.144805462155274 | 0.019729512 |
| *FAR2* | 0.144799556553367 | 0.019734574 |
| *RPUSD2* | 0.144781551006514 | 0.019750016 |
| *ACRV1* | 0.144741728118074 | 0.019784206 |
| *ZNF365* | 0.1447389601 | 0.019786585 |
| *DHTKD1* | 0.144719633911587 | 0.019803198 |
| *SSH2* | 0.144709090375653 | 0.019812266 |
| *RABL2B* | -0.1447062015 | 0.019814751 |
| *C18orf22* | -0.1447031412 | 0.019817385 |
| *GPATCH2* | 0.144701623019539 | 0.019818691 |
| *STK33* | -0.1446782625 | 0.019838802 |
| *NDUFA3* | -0.1446773644 | 0.019839575 |
| *PI4KAP2* | 0.144675322776593 | 0.019841334 |
| *SPTBN5* | 0.144669677562741 | 0.019846197 |
| *CYP26A1* | 0.14466329326014 | 0.019851698 |
| *ASCC1* | -0.1446531070 | 0.019860477 |
| *SMR3B* | 0.144651577043313 | 0.019861796 |
| *DAPK1* | 0.144636203926262 | 0.019875054 |
| *PRSS55* | 0.144619854280295 | 0.019889162 |
| *PNP* | 0.144607031574822 | 0.019900232 |
| *ADM2* | 0.144519410567842 | 0.019976025 |
| *ARL9* | -0.1445135895 | 0.019981069 |
| *TSSK6* | 0.144501373923498 | 0.019991657 |
| *COIL* | 0.144494638650001 | 0.019997498 |
| *CEP170L* | 0.144489775848313 | 0.020001715 |
| *C9orf96* | -0.1444852029 | 0.020005682 |
| *CITED1* | 0.144480878151551 | 0.020009434 |
| *HR* | -0.1444628068 | 0.02002512 |
| *NUPL2* | 0.144458342885278 | 0.020028996 |
| *ARHGEF11* | 0.144453021648664 | 0.020033618 |
| *PEX5* | -0.1444466791 | 0.020039128 |
| *MTMR10* | -0.1444448654 | 0.020040703 |
| *NUDCD2* | 0.144442991520248 | 0.020042332 |
| *APC* | 0.144432204912685 | 0.020051706 |
| *CEP164* | -0.1444242069 | 0.02005866 |
| *DEAF1* | -0.1443796854 | 0.020097405 |
| *POTEG* | 0.144372223811706 | 0.020103905 |
| *LIN7A* | 0.144344626176088 | 0.020127962 |
| *WNK1* | 0.144330592249487 | 0.020140205 |
| *C14orf45* | -0.1443280003 | 0.020142466 |
| *S100A10* | 0.144326984133225 | 0.020143353 |
| *AADACL4* | -0.1443091441 | 0.020158928 |
| *MUT* | 0.144305736640499 | 0.020161904 |
| *C11orf93* | -0.1442838069 | 0.020181066 |
| *PRDM10* | 0.144275845149715 | 0.020188026 |
| *RPGRIP1* | -0.1442525763 | 0.020208382 |
| *KRT8* | 0.144247725804267 | 0.020212627 |
| *LY6G5B* | 0.144226602177222 | 0.020231124 |
| *FAM176A* | 0.14422048338659 | 0.020236485 |
| *DPEP3* | -0.1442007955 | 0.020253742 |
| *TRIM6* | -0.1441825219 | 0.020269771 |
| *PWWP2B* | -0.1441805476 | 0.020271504 |
| *BRS3* | -0.1441769519 | 0.02027466 |
| *UBE4B* | 0.144159884321057 | 0.020289644 |
| *CWF19L1* | 0.144138221202808 | 0.020308676 |
| *SLC22A14* | 0.144129429773019 | 0.020316405 |
| *C13orf16* | 0.144115856371175 | 0.020328342 |
| *YSK4* | 0.14409943805265 | 0.020342789 |
| *ZFP90* | -0.1440921350 | 0.020349218 |
| *GFM1* | 0.144084180136837 | 0.020356223 |
| *PAFAH1B2* | 0.144063749831824 | 0.020374223 |
| *OR4L1* | -0.1440150278 | 0.020417206 |
| *CYP27C1* | 0.1439881426696 | 0.020440957 |
| *PLEKHB1* | -0.1439689415 | 0.020457935 |
| *BEND4* | 0.143959093781813 | 0.020466647 |
| *C12orf66* | 0.143958924255232 | 0.020466797 |
| *FAM150B* | -0.1439483364 | 0.020476168 |
| *SCGB1D1* | 0.143936780881264 | 0.020486399 |
| *LRRC45* | 0.143917386195383 | 0.020503582 |
| *RCVRN* | -0.1439001504 | 0.020518862 |
| *ORC5L* | 0.143892860152616 | 0.020525328 |
| *CALM2* | 0.143849399688223 | 0.020563911 |
| *COMMD4* | 0.143836780030364 | 0.020575126 |
| *TMEM155* | 0.143823372978873 | 0.020587047 |
| *RNMT* | 0.143796201977169 | 0.020611224 |
| *PVR* | 0.143788494268396 | 0.020618087 |
| *TMEM161B* | 0.143776141517079 | 0.02062909 |
| *MS4A13* | 0.143753020587933 | 0.020649699 |
| *CWC27* | 0.143750639443337 | 0.020651822 |
| *GRIA2* | -0.1437443167 | 0.020657461 |
| *RNF128* | 0.143717136137663 | 0.020681719 |
| *DUOXA2* | -0.1437145744 | 0.020684006 |
| *BIN3* | -0.1437117862 | 0.020686496 |
| *FUT3* | -0.1437099324 | 0.020688152 |
| *SGK494* | 0.143706315769906 | 0.020691382 |
| *PLEKHG7* | 0.143686305923121 | 0.020709263 |
| *RDH13* | -0.1436381697 | 0.020752333 |
| *RGS2* | -0.1436119421 | 0.020775833 |
| *C6orf141* | -0.1435912604 | 0.02079438 |
| *TP53AIP1* | 0.143589936103764 | 0.020795568 |
| *SLC17A6* | 0.143561894031021 | 0.02082074 |
| *PRKAG3* | 0.143504043333608 | 0.020872752 |
| *C3orf23* | -0.1434967693 | 0.0208793 |
| *ABCC13* | -0.1434961448 | 0.020879863 |
| *CCDC109A* | 0.143457822711278 | 0.020914389 |
| *NCRNA00182* | -0.1434535515 | 0.020918241 |
| *AMY1A* | -0.1434484765 | 0.020922818 |
| *SYF2* | -0.1434339615 | 0.020935913 |
| *POT1* | 0.143381884155208 | 0.020982954 |
| *ARL13B* | 0.143381008579556 | 0.020983745 |
| *LOC390595* | -0.1433476901 | 0.021013891 |
| *DNAJC22* | 0.143308864895173 | 0.021049066 |
| *MS4A10* | -0.1432820304 | 0.021073407 |
| *TRIM50* | -0.1432777256 | 0.021077314 |
| *HAGH* | -0.1432139570 | 0.021135265 |
| *DUOX1* | -0.1431991345 | 0.021148755 |
| *KRT18* | 0.143198292829251 | 0.021149522 |
| *RNF144B* | -0.1431793739 | 0.021166751 |
| *IL5RA* | -0.1431729129 | 0.021172638 |
| *OXCT1* | 0.14316858880467 | 0.021176579 |
| *ZNF285* | -0.1431580905 | 0.021186149 |
| *SLC25A16* | 0.143133690405424 | 0.021208406 |
| *PRDM2* | 0.143113761308262 | 0.021226599 |
| *ATP4A* | 0.143094778360417 | 0.021243942 |
| *C19orf6* | -0.1430922179 | 0.021246282 |
| *TBX22* | -0.1430827602 | 0.021254928 |
| *ETV3* | 0.143080984567909 | 0.021256551 |
| *GAB1* | -0.1430529228 | 0.021282223 |
| *SLC16A6* | 0.143016027007547 | 0.021316018 |
| *L3MBTL* | -0.1430113019 | 0.02132035 |
| *SPG7* | -0.1429743223 | 0.021354274 |
| *ZNF540* | -0.1429670013 | 0.021360996 |
| *SLC35D2* | -0.1429601904 | 0.021367251 |
| *FZD4* | -0.1429572593 | 0.021369943 |
| *IL1RAPL1* | 0.142938527599912 | 0.021387156 |
| *SHROOM2* | 0.142936397016762 | 0.021389115 |
| *TSEN54* | 0.142889325693319 | 0.021432426 |
| *FAM168A* | 0.142871406030285 | 0.021448934 |
| *CHCHD7* | 0.142865910578871 | 0.021453998 |
| *BCR* | -0.1428650769 | 0.021454767 |
| *ESPNP* | 0.142800660107611 | 0.021514214 |
| *FIG4* | -0.1427542334 | 0.021557148 |
| *UCN2* | 0.142735360248533 | 0.021574622 |
| *FRG2C* | 0.142716853447584 | 0.021591769 |
| *HIST1H2BE* | 0.142686837981589 | 0.021619604 |
| *PLCB4* | -0.1426813940 | 0.021624656 |
| *TRIML1* | 0.142653982654765 | 0.021650109 |
| *GEMIN8* | -0.1426282002 | 0.021674072 |
| *SH2B3* | 0.142609794707405 | 0.021691193 |
| *TMEM158* | 0.142604272148799 | 0.021696333 |
| *FAM117B* | -0.1426022599 | 0.021698206 |
| *AIM1* | 0.142602116395386 | 0.021698339 |
| *STAR* | -0.1425982049 | 0.02170198 |
| *CDH26* | -0.1425967600 | 0.021703325 |
| *NR2C2* | 0.142544765013109 | 0.021751779 |
| *C7orf34* | 0.142533321525475 | 0.021762455 |
| *10-Mar* | 0.142521449674192 | 0.021773536 |
| *MKNK1* | -0.1425179577 | 0.021776797 |
| *ADSS* | 0.142497528161705 | 0.021795879 |
| *SIDT1* | -0.1424855467 | 0.021807077 |
| *CIDEC* | -0.1424626174 | 0.021828522 |
| *PSMA2* | 0.142460239539262 | 0.021830747 |
| *GALNT9* | -0.1424549866 | 0.021835662 |
| *AGXT* | 0.142447369353828 | 0.021842792 |
| *KCNH5* | 0.14243681593796 | 0.021852674 |
| *DRAM2* | -0.1424214200 | 0.021867097 |
| *AMIGO1* | -0.1423573689 | 0.021927188 |
| *ANKRD11* | 0.142354688532815 | 0.021929705 |
| *LOC338588* | 0.142340741019228 | 0.021942811 |
| *TREM2* | 0.14234009975429 | 0.021943414 |
| *ABI2* | -0.1423170455 | 0.021965091 |
| *GCNT1* | 0.142315884142375 | 0.021966184 |
| *KIRREL2* | 0.142296978214134 | 0.021983975 |
| *PPAPDC3* | -0.1422466239 | 0.022031423 |
| *PSD* | -0.1422223911 | 0.022054288 |
| *F2RL3* | -0.1422081317 | 0.022067752 |
| *TSPO* | -0.1421744378 | 0.022099596 |
| *C20orf106* | 0.1421574747851 | 0.022115642 |
| *SIN3A* | 0.142148511963469 | 0.022124125 |
| *PTPN3* | 0.142140683635912 | 0.022131536 |
| *TSSK1B* | 0.142078379745383 | 0.022190597 |
| *LOC400027* | -0.1420630490 | 0.02220515 |
| *KLHL32* | -0.1420593955 | 0.02220862 |
| *DAXX* | 0.142053888087129 | 0.022213851 |
| *C13orf18* | -0.1420529934 | 0.022214701 |
| *GRAP* | -0.1420340626 | 0.02223269 |
| *CDON* | -0.1419989669 | 0.022266073 |
| *SH3RF2* | -0.1419901801 | 0.022274438 |
| *FOXC2* | 0.141986399657394 | 0.022278038 |
| *PSMD7* | 0.141980566665668 | 0.022283593 |
| *RFPL4A* | 0.141978344838153 | 0.022285709 |
| *HPS3* | 0.141976606324921 | 0.022287366 |
| *PCDHGC3* | -0.1419287671 | 0.022332978 |
| *SERINC4* | 0.141927893072473 | 0.022333812 |
| *SDC1* | 0.141925923430269 | 0.022335692 |
| *UAP1* | 0.141893043409388 | 0.022367092 |
| *GEMIN4* | 0.141892678001716 | 0.022367441 |
| *VPS53* | 0.14188694467229 | 0.02237292 |
| *HPCAL4* | 0.141874203254931 | 0.022385101 |
| *KLRD1* | -0.1418460223 | 0.022412062 |
| *RIT1* | 0.141793568552559 | 0.022462321 |
| *BNIPL* | 0.141776376124232 | 0.022478815 |
| *FAM177B* | -0.1417745584 | 0.022480559 |
| *NTRK3* | -0.1417567652 | 0.022497642 |
| *TBL3* | -0.1417181493 | 0.022534754 |
| *NACA* | -0.1417159374 | 0.022536881 |
| *TRIM8* | -0.1416929552 | 0.022558996 |
| *ADAMTS14* | 0.141685351710286 | 0.022566316 |
| *GTPBP10* | 0.141680028907473 | 0.022571442 |
| *WFDC2* | -0.1416676554 | 0.022583362 |
| *PVALB* | 0.14165127462308 | 0.02259915 |
| *CGB8* | 0.141629438389316 | 0.022620211 |
| *FOXP2* | 0.14162439101708 | 0.022625082 |
| *IP6K1* | -0.1416209794 | 0.022628374 |
| *ARF4* | 0.141592930284455 | 0.022655461 |
| *SLC4A7* | 0.14158391989725 | 0.022664169 |
| *C17orf100* | 0.141578696671606 | 0.022669217 |
| *CDK12* | 0.141549622073613 | 0.022697339 |
| *NPY1R* | -0.1415173413 | 0.022728597 |
| *TAF4B* | 0.141514437171546 | 0.022731411 |
| *FAM76B* | 0.141495003303241 | 0.022750249 |
| *PLD6* | -0.1414900436 | 0.022755059 |
| *SETD1B* | -0.1414887730 | 0.022756291 |
| *OASL* | 0.141488052409114 | 0.02275699 |
| *EML6* | 0.141477658571118 | 0.022767073 |
| *ARHGEF2* | 0.141457966023737 | 0.022786188 |
| *TTC28* | -0.1414492018 | 0.022794699 |
| *DLG1* | 0.141443103093263 | 0.022800624 |
| *XRCC6* | 0.141413629187692 | 0.022829275 |
| *ARHGDIB* | -0.1413741398 | 0.02286771 |
| *FGD4* | -0.1413649902 | 0.022876623 |
| *MPDZ* | -0.1413498432 | 0.022891385 |
| *KCMF1* | 0.141322926430045 | 0.022917639 |
| *ABHD10* | -0.1412962575 | 0.022943677 |
| *HCRTR2* | 0.141287021760517 | 0.0229527 |
| *C14orf39* | 0.141281467519182 | 0.022958127 |
| *JUP* | -0.1412780628 | 0.022961455 |
| *ZNF280A* | 0.141261752274194 | 0.022977403 |
| *RUFY1* | -0.1412608126 | 0.022978322 |
| *FAM83B* | 0.14120161995036 | 0.02303628 |
| *TCAM1P* | 0.141200800079677 | 0.023037083 |
| *SPEF1* | -0.1411961425 | 0.023041649 |
| *IFI44* | 0.141194668200542 | 0.023043095 |
| *C6orf125* | 0.141144208053065 | 0.023092615 |
| *TULP3* | 0.141135494338578 | 0.023101175 |
| *FCN3* | -0.1411182055 | 0.023118169 |
| *SLC5A2* | -0.1411159867 | 0.02312035 |
| *TMEM39A* | 0.14111154033033 | 0.023124723 |
| *ACN9* | 0.141097494230341 | 0.02313854 |
| *GPCPD1* | -0.1410708044 | 0.023164815 |
| *PAX7* | 0.141057445635151 | 0.023177975 |
| *C8orf84* | -0.1410325679 | 0.023202501 |
| *CGN* | 0.141026037530098 | 0.023208943 |
| *FIGLA* | -0.1409858639 | 0.023248605 |
| *LRPAP1* | -0.1409845586 | 0.023249895 |
| *SLC3A1* | -0.1409632586 | 0.023270949 |
| *SP9* | 0.1409352180704 | 0.02329869 |
| *E2F6* | 0.140866073909295 | 0.023367218 |
| *HORMAD1* | 0.140854795945874 | 0.023378412 |
| *RRAS2* | 0.140843112298524 | 0.023390014 |
| *TAF1L* | 0.140839481026066 | 0.02339362 |
| *ATL1* | -0.1408237670 | 0.023409234 |
| *MAB21L1* | 0.14082046427254 | 0.023412517 |
| *PTRH1* | -0.1408008953 | 0.023431975 |
| *LPO* | 0.140787147843989 | 0.023445654 |
| *SLC25A18* | -0.1407678507 | 0.023464866 |
| *CXXC5* | 0.140752314057992 | 0.023480343 |
| *FAM66C* | -0.1407093312 | 0.023523209 |
| *MYOZ2* | -0.1407089238 | 0.023523616 |
| *RPL14* | -0.1406590113 | 0.023573478 |
| *VSNL1* | 0.140642134903796 | 0.023590358 |
| *FOSB* | -0.1406354933 | 0.023597004 |
| *ANXA13* | -0.1406098212 | 0.023622708 |
| *KLKB1* | -0.1405864044 | 0.023646174 |
| *WDR7* | -0.1405356991 | 0.023697057 |
| *RNF121* | -0.1405197426 | 0.023713088 |
| *SNTG2* | -0.1405192249 | 0.023713609 |
| *TFEB* | -0.1405177709 | 0.02371507 |
| *VASP* | -0.1404742862 | 0.023758811 |
| *UBE2G2* | -0.1404496234 | 0.023783649 |
| *GAB2* | -0.1404194960 | 0.023814022 |
| *PSMB10* | -0.1404040958 | 0.02382956 |
| *MAP2K4* | 0.140376251394734 | 0.023857677 |
| *SUMO4* | 0.14036635116504 | 0.023867681 |
| *TXN* | 0.140360024047729 | 0.023874076 |
| *UBXN7* | 0.140359897242097 | 0.023874205 |
| *KCNQ4* | -0.1403461502 | 0.023888105 |
| *RBAK* | 0.140332363646149 | 0.023902052 |
| *GNG11* | -0.1403279829 | 0.023906485 |
| *ATP11A* | 0.1403279764839 | 0.023906492 |
| *NPL* | 0.140325210990131 | 0.023909291 |
| *CFLAR* | -0.1403236480 | 0.023910873 |
| *NUCKS1* | 0.140323299375254 | 0.023911226 |
| *PRR13* | -0.1403195345 | 0.023915037 |
| *TUSC1* | -0.1402795326 | 0.023955564 |
| *TMEM188* | 0.140278125080886 | 0.023956991 |
| *ENPP7* | -0.1402632335 | 0.023972094 |
| *FOXA2* | 0.140260134445022 | 0.023975238 |
| *MON1A* | -0.1402108013 | 0.024025336 |
| *ATP5A1* | -0.1402078712 | 0.024028314 |
| *DMWD* | -0.1401876086 | 0.024048919 |
| *PITX1* | 0.140185760777537 | 0.024050799 |
| *TNFRSF19* | 0.140179818895236 | 0.024056844 |
| *EMID1* | -0.1401040305 | 0.02413407 |
| *FAM46B* | -0.1400326997 | 0.024206949 |
| *CGRRF1* | -0.1400273057 | 0.024212468 |
| *PRR15L* | -0.1400154653 | 0.024224586 |
| *SORL1* | -0.1400047669 | 0.02423554 |
| *PPTC7* | 0.139966522649116 | 0.024274732 |
| *BCCIP* | 0.139963345925579 | 0.02427799 |
| *GDF7* | 0.139962097896089 | 0.02427927 |
| *PIGV* | -0.1399235583 | 0.024318826 |
| *KIAA0562* | 0.139921720153522 | 0.024320714 |
| *TGFBRAP1* | 0.139918851507507 | 0.024323661 |
| *FMO4* | -0.1399159634 | 0.024326628 |
| *LRRK1* | 0.139909403824278 | 0.024333368 |
| *MPHOSPH10* | 0.139889491957697 | 0.024353837 |
| *ENO3* | 0.139861800878887 | 0.024382328 |
| *FAM100B* | 0.139826911353532 | 0.024418267 |
| *C16orf7* | -0.1398181122 | 0.024427338 |
| *CELP* | -0.1398072036 | 0.024438587 |
| *CPEB3* | -0.1397797107 | 0.024466959 |
| *IL11RA* | -0.1397487310 | 0.024498964 |
| *OSBPL11* | 0.139727174057191 | 0.024521255 |
| *AMFR* | -0.1397049611 | 0.024544243 |
| *POTEE* | 0.139701582925132 | 0.02454774 |
| *CCDC140* | 0.139682068474076 | 0.024567953 |
| *CDK18* | -0.1396482581 | 0.024603008 |
| *AKAP10* | 0.139643478052892 | 0.024607967 |
| *KANK2* | -0.1396138751 | 0.0246387 |
| *IFIT1* | -0.1395779825 | 0.024676007 |
| *MAGEC3* | -0.1395566817 | 0.02469817 |
| *DYNC2LI1* | -0.1395090298 | 0.024747814 |
| *LOC643837* | 0.139507833247473 | 0.024749061 |
| *BCL9L* | -0.1394531971 | 0.024806089 |
| *OR6S1* | 0.139447295602517 | 0.024812255 |
| *MOV10L1* | -0.1394322151 | 0.024828019 |
| *ID4* | -0.1394240356 | 0.024836573 |
| *NEDD4L* | 0.13935804186741 | 0.024905679 |
| *PCBP3* | -0.1393530526 | 0.02491091 |
| *TSPAN19* | 0.139346711206613 | 0.024917561 |
| *CGGBP1* | 0.139342045879603 | 0.024922454 |
| *FAM109B* | -0.1393293603 | 0.024935765 |
| *GSK3A* | 0.139287148718957 | 0.0249801 |
| *CCDC103* | -0.1392640940 | 0.025004343 |
| *DHRS9* | -0.1392599815 | 0.02500867 |
| *CCDC88C* | -0.1392589304 | 0.025009776 |
| *IL20RB* | 0.139233734312569 | 0.025036299 |
| *HERC2* | 0.139188602824787 | 0.025083868 |
| *C20orf186* | 0.139187503560855 | 0.025085027 |
| *OR10V1* | -0.1391360631 | 0.025139343 |
| *C8orf40* | -0.1391297897 | 0.025145974 |
| *SARS2* | 0.139123758871233 | 0.02515235 |
| *PDLIM1* | -0.1391154134 | 0.025161175 |
| *PKD1L2* | -0.1391053664 | 0.025171804 |
| *CYB5A* | -0.1390981486 | 0.025179441 |
| *SYBU* | -0.1390763159 | 0.025202557 |
| *COPS8* | -0.1390585976 | 0.025221329 |
| *ADAR* | 0.13903330919043 | 0.025248143 |
| *C14orf72* | 0.139031115500469 | 0.02525047 |
| *ADAMTS18* | -0.1390085237 | 0.025274448 |
| *HLA-DMA* | -0.1389731524 | 0.025312028 |
| *LOC374443* | 0.138972669505902 | 0.025312541 |
| *ANKIB1* | 0.138953816234788 | 0.025332591 |
| *HUS1B* | 0.138948111292517 | 0.025338661 |
| *SNN* | -0.1388801631 | 0.025411053 |
| *ARHGEF19* | 0.138875283228212 | 0.025416258 |
| *C3orf47* | -0.1388740619 | 0.025417561 |
| *PNOC* | 0.138862776899831 | 0.025429604 |
| *SIVA1* | 0.138827475078102 | 0.025467308 |
| *ADH6* | -0.1388038871 | 0.025492528 |
| *DCUN1D5* | 0.13877553958958 | 0.025522865 |
| *SCD5* | -0.1387741785 | 0.025524323 |
| *EPN2* | -0.1387672940 | 0.025531695 |
| *SMG1* | 0.13876661383005 | 0.025532424 |
| *REEP1* | -0.1387474615 | 0.025552945 |
| *ISY1* | 0.138746708467555 | 0.025553752 |
| *ZNF700* | 0.138745263097112 | 0.025555301 |
| *TSPAN11* | 0.138743824685805 | 0.025556843 |
| *KLHL7* | 0.138722013485655 | 0.025580233 |
| *GP6* | -0.1387196152 | 0.025582806 |
| *PDE12* | 0.138708631512215 | 0.025594592 |
| *LGALS3BP* | -0.1386928296 | 0.025611558 |
| *ZNF383* | 0.138688977415891 | 0.025615695 |
| *LOC100129550* | -0.1386795611 | 0.025625811 |
| *ULK1* | -0.1386661219 | 0.025640254 |
| *LAMA4* | -0.1386609196 | 0.025645847 |
| *CPA5* | 0.138659564690471 | 0.025647303 |
| *SNORA74B* | -0.1386478950 | 0.025659854 |
| *CCDC104* | -0.1386322341 | 0.025676704 |
| *UGDH* | 0.13862570937331 | 0.025683728 |
| *MATN1* | 0.138569443253397 | 0.025744361 |
| *SYCP3* | 0.138567567318403 | 0.025746385 |
| *METTL10* | 0.138566523302114 | 0.025747511 |
| *PROX1* | 0.138564126287537 | 0.025750098 |
| *ZFR* | 0.138532274836635 | 0.025784483 |
| *C4orf14* | -0.1385191438 | 0.02579867 |
| *EXOSC5* | 0.138508474717716 | 0.025810202 |
| *LOC100133469* | 0.138497482876831 | 0.025822087 |
| *AP4M1* | -0.1384816816 | 0.025839181 |
| *ELOVL2* | 0.138475604053051 | 0.025845759 |
| *GNRHR* | 0.138471699190561 | 0.025849986 |
| *KIAA1045* | -0.1384542945 | 0.025868833 |
| *HGF* | 0.138443873967657 | 0.025880122 |
| *ANKS1B* | -0.1384407102 | 0.025883551 |
| *FIGN* | -0.1384388627 | 0.025885553 |
| *C14orf21* | 0.138408931270631 | 0.02591801 |
| *CEACAM1* | -0.1383849957 | 0.025943991 |
| *RNF222* | 0.138368706485508 | 0.025961685 |
| *C3orf1* | -0.1383491265 | 0.025982966 |
| *APBB3* | -0.1383483049 | 0.02598386 |
| *GATS* | -0.1383346740 | 0.025998685 |
| *KLRG1* | -0.1383223230 | 0.026012124 |
| *MAGEB16* | 0.138304099168652 | 0.026031965 |
| *KLHL24* | -0.1382998838 | 0.026036556 |
| *BMS1P4* | 0.138297512977051 | 0.026039138 |
| *MFSD4* | -0.1382770432 | 0.026061445 |
| *SIX6* | 0.13827642878443 | 0.026062115 |
| *LPGAT1* | 0.138271394982225 | 0.026067603 |
| *BCL7A* | 0.138270711414187 | 0.026068348 |
| *NPLOC4* | 0.138267205836154 | 0.026072171 |
| *TRAM2* | 0.1382636871901 | 0.026076008 |
| *NBPF7* | 0.138236197262531 | 0.026106005 |
| *SUSD1* | 0.13819847732584 | 0.026147213 |
| *TLE6* | -0.1381964996 | 0.026149375 |
| *GAPDHS* | 0.138146870772803 | 0.026203682 |
| *LMTK2* | 0.138099417771829 | 0.026255699 |
| *SF3B5* | -0.1380916685 | 0.026264202 |
| *GAPT* | -0.1380899159 | 0.026266125 |
| *ZNF317* | 0.138074264196657 | 0.026283308 |
| *NLRP5* | 0.138069619738394 | 0.026288408 |
| *RNU4ATAC* | 0.138063183267165 | 0.026295478 |
| *ELMOD3* | -0.1380572411 | 0.026302006 |
| *ATXN7L3* | 0.138038613241015 | 0.026322481 |
| *SLC15A3* | -0.1380374110 | 0.026323803 |
| *PNPLA1* | 0.138028281548941 | 0.026333843 |
| *WISP2* | -0.1380153988 | 0.026348016 |
| *CDRT15* | 0.13799513206881 | 0.026370326 |
| *SPATA13* | 0.137983821067094 | 0.026382784 |
| *TRAK2* | -0.1379809483 | 0.026385949 |
| *TP53* | -0.1379724998 | 0.026395259 |
| *B3GALTL* | 0.137940729470462 | 0.026430294 |
| *ZBTB17* | 0.137938626281766 | 0.026432615 |
| *KCNN4* | 0.137917420771094 | 0.026456023 |
| *DDX56* | 0.137890429300957 | 0.026485844 |
| *SELO* | -0.1378189894 | 0.026564912 |
| *UBE2E1* | 0.137818543074821 | 0.026565407 |
| *RAB4A* | -0.1378104576 | 0.026574368 |
| *HS6ST2* | 0.1378103712466 | 0.026574464 |
| *S1PR2* | 0.137799463983645 | 0.026586558 |
| *DDX18* | 0.137733802538906 | 0.02665946 |
| *LOC338758* | 0.137719089752431 | 0.026675819 |
| *GMCL1L* | 0.137679749961913 | 0.026719602 |
| *MYO18A* | -0.1376425585 | 0.026761051 |
| *TRIML2* | 0.137641113052585 | 0.026762663 |
| *NR1I3* | -0.1376403415 | 0.026763524 |
| *KIAA1704* | 0.137629534164036 | 0.02677558 |
| *MPV17L* | -0.1376249553 | 0.026780689 |
| *SP3* | 0.137622082865919 | 0.026783894 |
| *C17orf64* | 0.137614189536378 | 0.026792705 |
| *DYNC1I2* | -0.1376136869 | 0.026793266 |
| *NPR2* | -0.1375988413 | 0.026809844 |
| *PABPC1L2B* | 0.137577678369006 | 0.026833491 |
| *C5orf41* | -0.1375721335 | 0.02683969 |
| *MCTP2* | 0.137567645108697 | 0.026844708 |
| *CEBPA* | -0.1375588889 | 0.026854501 |
| *CCPG1* | -0.1375583979 | 0.02685505 |
| *C1QTNF9* | -0.1375570696 | 0.026856536 |
| *LOC253724* | -0.1375350312 | 0.026881199 |
| *DPEP2* | -0.1375160084 | 0.026902502 |
| *CSDC2* | -0.1374916105 | 0.026929847 |
| *C7orf42* | -0.1374801928 | 0.026942651 |
| *ETS1* | 0.137477579979066 | 0.026945582 |
| *MAGI2* | -0.1374451662 | 0.026981966 |
| *PLEKHG3* | -0.1374177735 | 0.027012746 |
| *CCNYL1* | 0.137416041187506 | 0.027014693 |
| *FABP5L3* | -0.1374092917 | 0.027022283 |
| *SUSD4* | -0.1374015313 | 0.027031011 |
| *ADAM32* | -0.1373721435 | 0.027064086 |
| *GCK* | -0.1373643900 | 0.027072818 |
| *SLC7A4* | -0.1373286153 | 0.027113139 |
| *C1orf64* | -0.1373150647 | 0.027128425 |
| *C8orf75* | 0.137310984360301 | 0.027133029 |
| *TP53BP2* | 0.137283614990283 | 0.027163931 |
| *TERF2IP* | -0.1372750326 | 0.027173627 |
| *RAB27A* | 0.137271856573732 | 0.027177216 |
| *OR6V1* | 0.137215453045582 | 0.027241021 |
| *BLOC1S1* | -0.1372139043 | 0.027242775 |
| *SESN2* | 0.137205547353402 | 0.02725224 |
| *C4orf22* | 0.137172464458057 | 0.027289737 |
| *C19orf12* | 0.13717208469097 | 0.027290168 |
| *PRKAG2* | -0.1371648114 | 0.027298418 |
| *TSGA14* | 0.137164614812453 | 0.027298641 |
| *MEPCE* | -0.1371582444 | 0.027305868 |
| *WFDC8* | 0.137157501666008 | 0.027306711 |
| *KIR3DX1* | 0.137152446900011 | 0.027312447 |
| *ZNF768* | -0.1371506708 | 0.027314463 |
| *CDK7* | 0.137139767987014 | 0.02732684 |
| *YARS2* | 0.137126257450834 | 0.027342184 |
| *MYOM2* | -0.1371238390 | 0.027344931 |
| *IFNA1* | 0.137123323696974 | 0.027345517 |
| *AZIN1* | 0.137114338101866 | 0.027355727 |
| *FGGY* | -0.1370928119 | 0.0273802 |
| *MYO18B* | 0.137084710193551 | 0.027389415 |
| *C20orf202* | -0.1370599363 | 0.027417612 |
| *HSFY2* | -0.1370347067 | 0.027446352 |
| *ABCC10* | 0.137024136515773 | 0.027458401 |
| *RAX* | 0.137005160599958 | 0.027480043 |
| *NAT2* | -0.1370026309 | 0.02748293 |
| *FAM53B* | -0.1369951139 | 0.027491507 |
| *BASP1* | 0.136994907003076 | 0.027491744 |
| *CLTCL1* | 0.136980981306625 | 0.027507641 |
| *MGC3771* | -0.1369675843 | 0.027522942 |
| *TTC32* | 0.136930206002706 | 0.027565672 |
| *ZNF841* | 0.136915404255253 | 0.027582608 |
| *BCAR4* | -0.1368883571 | 0.02761358 |
| *EPHA5* | 0.136871144864883 | 0.027633304 |
| *FBXO27* | -0.1368600367 | 0.027646041 |
| *HIST1H2BD* | 0.136852462798611 | 0.027654727 |
| *DNAJA3* | 0.136844188566238 | 0.02766422 |
| *LOC723809* | 0.136820597011734 | 0.027691301 |
| *OR5D18* | 0.136805468708971 | 0.027708679 |
| *UCP3* | 0.136801407222905 | 0.027713346 |
| *TGDS* | 0.136797545293053 | 0.027717785 |
| *LDB2* | -0.1367945803 | 0.027721193 |
| *HSD17B11* | -0.1367617609 | 0.027758939 |
| *DYSFIP1* | 0.13672308087841 | 0.027803483 |
| *SH3BP1* | 0.136708354244549 | 0.027820458 |
| *STK10* | 0.136702679121208 | 0.027827002 |
| *YWHAQ* | 0.136699708848286 | 0.027830428 |
| *NGDN* | 0.136684444686216 | 0.027848037 |
| *COX10* | 0.136666906495543 | 0.027868282 |
| *GLRX2* | 0.136653835008581 | 0.027883379 |
| *ZBTB37* | 0.136629819506483 | 0.027911134 |
| *NEDD9* | -0.1366252844 | 0.027916378 |
| *RNPC3* | -0.1366156580 | 0.027927512 |
| *CD74* | -0.1366141981 | 0.027929201 |
| *PHGDH* | 0.136573720358301 | 0.027976061 |
| *RRS1* | 0.136568175218516 | 0.027982486 |
| *UGT3A1* | 0.136563464159967 | 0.027987945 |
| *COL3A1* | 0.136545530833007 | 0.028008735 |
| *NCOA3* | 0.136507581557712 | 0.028052773 |
| *NPVF* | -0.1364922832 | 0.028070543 |
| *SLC22A11* | -0.1364811184 | 0.028083518 |
| *ZNF488* | 0.136469815005175 | 0.028096659 |
| *PEA15* | -0.1364695235 | 0.028096997 |
| *MMP15* | -0.1364514783 | 0.028117987 |
| *PCYT1B* | -0.1364445395 | 0.028126062 |
| *GTF2IP1* | -0.1364336643 | 0.028138721 |
| *NAT15* | -0.1364019450 | 0.028175672 |
| *C11orf58* | -0.1363956265 | 0.028183038 |
| *TIRAP* | -0.1363743400 | 0.028207864 |
| *GSX2* | 0.136368236218926 | 0.028214986 |
| *SLC4A11* | 0.136344670269601 | 0.028242499 |
| *ZNF565* | 0.136320652382666 | 0.028270563 |
| *SLC9A2* | 0.136296508652261 | 0.028298798 |
| *STEAP4* | -0.1362757380 | 0.028323107 |
| *CD93* | -0.1362437479 | 0.028360583 |
| *MMACHC* | 0.136242905279694 | 0.028361571 |
| *PIGN* | 0.136232723815222 | 0.028373507 |
| *SSX3* | 0.136223786292358 | 0.028383989 |
| *PRTN3* | -0.1362205040 | 0.028387839 |
| *NPAS1* | 0.136216576882285 | 0.028392446 |
| *C1orf105* | 0.136190562724396 | 0.028422982 |
| *PNLIPRP2* | -0.1361826987 | 0.028432219 |
| *TFAP2A* | 0.136179143427463 | 0.028436395 |
| *LOC84740* | 0.136176150765315 | 0.028439911 |
| *SRP19* | 0.136169189004914 | 0.028448092 |
| *RHBDD1* | -0.1361616384 | 0.028456967 |
| *KIRREL* | 0.136131458398013 | 0.028492464 |
| *NCOA5* | 0.136073623608126 | 0.028560594 |
| *GPR61* | 0.136067178456432 | 0.028568195 |
| *MRM1* | -0.1360629624 | 0.028573168 |
| *ADRA2B* | -0.1360439836 | 0.028595564 |
| *BARHL2* | 0.136029569458675 | 0.028612584 |
| *SLC22A18AS* | -0.1360221899 | 0.028621301 |
| *JUB* | 0.136019554607168 | 0.028624414 |
| *COG6* | 0.1360096845373 | 0.028636077 |
| *CHN2* | -0.1360094655 | 0.028636336 |
| *GOT1* | 0.13599749564513 | 0.028650486 |
| *TBCE* | 0.135969568072943 | 0.028683524 |
| *NIPAL2* | -0.1359587823 | 0.028696292 |
| *USP46* | 0.13591805663923 | 0.028744546 |
| *VAV2* | 0.135861013778602 | 0.028812251 |
| *HOXC13* | 0.135858928186758 | 0.028814729 |
| *ZNF605* | -0.1358564066 | 0.028817725 |
| *MMP12* | 0.135850205052112 | 0.028825095 |
| *PYY* | 0.135845390824167 | 0.028830818 |
| *SH3BP2* | 0.135843906249052 | 0.028832583 |
| *FAM54B* | -0.1358308774 | 0.028848075 |
| *C16orf92* | -0.1358191889 | 0.02886198 |
| *TMEM143* | -0.1358167846 | 0.028864841 |
| *ANKRD20A4* | 0.135815328041502 | 0.028866574 |
| *COMT* | -0.1357977463 | 0.028887503 |
| *MB* | -0.1357960594 | 0.028889512 |
| *TFIP11* | 0.135790572007715 | 0.028896047 |
| *FKBP14* | 0.135779462160736 | 0.028909283 |
| *HAUS7* | 0.135766851782444 | 0.028924312 |
| *WFIKKN1* | 0.135755226584075 | 0.028938172 |
| *DZIP3* | -0.1357505538 | 0.028943745 |
| *ZDHHC2* | 0.135745840986984 | 0.028949367 |
| *HIF3A* | -0.1357189661 | 0.028981442 |
| *TRAPPC4* | -0.1357163841 | 0.028984526 |
| *LPPR2* | -0.1357033997 | 0.029000035 |
| *SPANXB2* | 0.135687231158908 | 0.029019357 |
| *ADAMTSL5* | -0.1356656990 | 0.029045107 |
| *NCOA2* | 0.135663411332872 | 0.029047844 |
| *C6orf62* | 0.135651129073545 | 0.029062542 |
| *RARRES2* | -0.1356456789 | 0.029069066 |
| *ZBTB45* | -0.1356384229 | 0.029077754 |
| *NAPSA* | -0.1356349116 | 0.029081959 |
| *FKSG73* | -0.1356342841 | 0.02908271 |
| *VSIG8* | 0.135616608990565 | 0.029103885 |
| *BBS7* | 0.135581732107037 | 0.029145707 |
| *LOC387646* | 0.135570827177228 | 0.029158794 |
| *ZNF471* | -0.1355453730 | 0.029189361 |
| *SLC25A22* | 0.135522344466398 | 0.029217039 |
| *KRTAP1-1* | 0.135513152821998 | 0.029228092 |
| *NPPC* | 0.135481473243997 | 0.029266216 |
| *CASC3* | -0.1354730473 | 0.029276364 |
| *ARV1* | -0.1354707313 | 0.029279153 |
| *UBXN4* | 0.135466806515159 | 0.029283881 |
| *ATP1B2* | -0.1354639022 | 0.02928738 |
| *ZNF397* | -0.1354522435 | 0.02930143 |
| *GALNT7* | 0.135442777025097 | 0.029312843 |
| *CLRN2* | 0.135407431110994 | 0.029355487 |
| *TIMM17B* | 0.135368837968185 | 0.02940211 |
| *FAM71E1* | -0.1353625545 | 0.029409707 |
| *TSPAN1* | -0.1353619815 | 0.0294104 |
| *TMED4* | -0.1353602115 | 0.02941254 |
| *GALNS* | 0.135355425061009 | 0.029418329 |
| *TGM1* | 0.135350238805432 | 0.029424602 |
| *H19* | -0.1353483222 | 0.02942692 |
| *PTTG1IP* | -0.1353459449 | 0.029429797 |
| *OSBPL2* | -0.1353383568 | 0.029438978 |
| *TRAF2* | 0.135336472234014 | 0.029441259 |
| *UBXN11* | 0.135329554248979 | 0.029449633 |
| *ENG* | -0.1352906021 | 0.029496819 |
| *C10orf88* | 0.135284138492671 | 0.029504655 |
| *PCSK1N* | -0.1352670275 | 0.029525408 |
| *LOC92973* | -0.1352571395 | 0.029537407 |
| *KLF14* | 0.135236592439286 | 0.029562352 |
| *MPPE1* | -0.1352142703 | 0.029589474 |
| *TMSB15B* | 0.135186981735447 | 0.029622658 |
| *ZNF630* | -0.1351336756 | 0.029687573 |
| *MYL1* | 0.135127541660741 | 0.02969505 |
| *CDH12* | 0.135115469729665 | 0.029709771 |
| *CDH5* | -0.1351134452 | 0.029712241 |
| *GRWD1* | 0.135083371611141 | 0.029748943 |
| *C1orf85* | -0.1350744345 | 0.029759858 |
| *TMEM200B* | -0.1350638094 | 0.029772838 |
| *P704P* | 0.135050817631438 | 0.029788717 |
| *COX15* | -0.1350490641 | 0.02979086 |
| *ZC4H2* | -0.1350385316 | 0.029803739 |
| *IL8* | 0.13497973300836 | 0.029875724 |
| *GSS* | 0.134976320114879 | 0.029879906 |
| *UFC1* | -0.1349731801 | 0.029883755 |
| *HIGD2B* | 0.134927282878039 | 0.029940061 |
| *ZNF561* | -0.1349100143 | 0.029961269 |
| *NPAT* | 0.134901293431073 | 0.029971985 |
| *FTCD* | -0.1348794417 | 0.029998848 |
| *ELANE* | -0.1348616596 | 0.030020724 |
| *GRIN2C* | -0.1348561628 | 0.030027489 |
| *TTBK2* | 0.134846736815903 | 0.030039093 |
| *SCNM1* | 0.134809001141986 | 0.030085585 |
| *STMN3* | -0.1347802834 | 0.030121008 |
| *PKLR* | -0.1347691499 | 0.030134751 |
| *CCDC114* | 0.134766366457947 | 0.030138187 |
| *NLRP1* | -0.1347333893 | 0.030178928 |
| *HRH2* | 0.134707530507745 | 0.030210908 |
| *UNC13B* | -0.1346950330 | 0.030226374 |
| *LAMB1* | 0.134660151988182 | 0.030269575 |
| *NEGR1* | -0.1346426700 | 0.030291248 |
| *RPL13AP20* | -0.1346424517 | 0.030291518 |
| *RIMBP2* | -0.1346391888 | 0.030295565 |
| *NFE2* | -0.1346220553 | 0.03031682 |
| *NDUFA2* | -0.1345883762 | 0.030358639 |
| *SPEM1* | 0.134571986666758 | 0.030379008 |
| *C16orf78* | -0.1345358972 | 0.0304239 |
| *CXCL3* | 0.134508469148591 | 0.030458056 |
| *RPUSD3* | 0.134507401714294 | 0.030459386 |
| *AP3S2* | 0.134490284107599 | 0.03048072 |
| *FOLR2* | -0.1344747569 | 0.030500083 |
| *CSMD3* | 0.13446874776445 | 0.030507579 |
| *PPP3CC* | -0.1344684990 | 0.03050789 |
| *P2RY12* | -0.1344440409 | 0.030538417 |
| *LYPD6* | 0.134439847656609 | 0.030543654 |
| *BTNL8* | -0.1344305625 | 0.030555252 |
| *NYNRIN* | -0.1343907989 | 0.030604963 |
| *PRINS* | -0.1343587151 | 0.030645123 |
| *CRIM1* | -0.1343425128 | 0.030665421 |
| *TOR3A* | 0.134330127262935 | 0.030680945 |
| *GNAI2* | -0.1343203108 | 0.030693253 |
| *RUFY3* | -0.1343161798 | 0.030698434 |
| *MCART1* | 0.134269596674773 | 0.03075691 |
| *BHLHE40* | 0.134264445817552 | 0.030763382 |
| *TLN1* | -0.1342607075 | 0.03076808 |
| *AGTPBP1* | 0.134256067223974 | 0.030773912 |
| *ORC2L* | 0.134239394301385 | 0.030794874 |
| *CCL20* | 0.134232680660864 | 0.030803319 |
| *RHOG* | -0.1342124319 | 0.030828799 |
| *USP18* | 0.134204264287472 | 0.030839083 |
| *PAFAH1B1* | 0.134194263078963 | 0.030851678 |
| *ACSL5* | -0.1341699776 | 0.030882282 |
| *HIRIP3* | 0.134160388756778 | 0.030894372 |
| *LOC100128542* | -0.1341487782 | 0.030909018 |
| *NAV3* | 0.134147507427176 | 0.030910621 |
| *METTL5* | -0.1341346438 | 0.030926854 |
| *MAPK7* | 0.134079306745758 | 0.030996771 |
| *ASB18* | 0.134064551372691 | 0.031015436 |
| *HULC* | 0.134050241520558 | 0.031033548 |
| *SRF* | -0.1340369871 | 0.031050331 |
| *FTO* | -0.1340271011 | 0.031062854 |
| *RIMBP3* | 0.134026155289478 | 0.031064053 |
| *NKD1* | -0.1339934499 | 0.031105515 |
| *DEGS2* | -0.1339543909 | 0.031155093 |
| *NID2* | 0.133925574837367 | 0.031191714 |
| *CT47B1* | 0.133907065056277 | 0.031215256 |
| *NCF1B* | -0.1339017164 | 0.031222061 |
| *MREG* | 0.133889571047792 | 0.03123752 |
| *MFSD7* | -0.1338830524 | 0.031245819 |
| *PKD1L3* | 0.13387968162669 | 0.031250112 |
| *ZNF408* | -0.1338731607 | 0.031258417 |
| *SEL1L3* | 0.133847714626365 | 0.031290844 |
| *RNF39* | 0.133819768720727 | 0.03132649 |
| *C5orf46* | 0.133800566750905 | 0.031351003 |
| *XPO7* | 0.133780888658834 | 0.03137614 |
| *RG9MTD3* | -0.1337524996 | 0.031412436 |
| *NIPAL1* | 0.133712420286365 | 0.031463738 |
| *KIF9* | -0.1337063652 | 0.031471495 |
| *CSNK1A1L* | 0.133689897974224 | 0.031492599 |
| *TEAD3* | -0.1336849300 | 0.031498968 |
| *PDE1C* | -0.1336792279 | 0.03150628 |
| *BET1* | 0.133665887847093 | 0.031523391 |
| *GGTLC2* | -0.1336643263 | 0.031525394 |
| *ZNF804B* | 0.133639841854594 | 0.031556822 |
| *TNFSF10* | -0.1336080641 | 0.031597652 |
| *IMMT* | 0.133601116588332 | 0.031606585 |
| *COX6C* | -0.1336010291 | 0.031606697 |
| *BTBD3* | 0.133594313141463 | 0.031615334 |
| *C19orf63* | -0.1335906616 | 0.031620031 |
| *GUSBP1* | 0.133583883881965 | 0.031628751 |
| *CDSN* | -0.1335718480 | 0.03164424 |
| *ESM1* | 0.133558036277015 | 0.031662022 |
| *MUDENG* | 0.133554451025189 | 0.031666639 |
| *CRYBA4* | 0.133519675828294 | 0.031711455 |
| *LOC647288* | 0.13351795033646 | 0.03171368 |
| *GUSB* | 0.13350501636379 | 0.031730364 |
| *CERKL* | 0.133492091611019 | 0.031747042 |
| *OR13F1* | 0.133490811197152 | 0.031748695 |
| *TCEA1* | 0.133484841612041 | 0.031756402 |
| *CNR1* | -0.1334691240 | 0.0317767 |
| *F11R* | -0.1334563772 | 0.031793169 |
| *GUSBL1* | 0.133450399910297 | 0.031800895 |
| *HIST1H2AK* | 0.133446202280266 | 0.031806321 |
| *CALHM3* | 0.133413718817239 | 0.031848339 |
| *NDUFA4* | -0.1334078585 | 0.031855925 |
| *SLITRK1* | 0.133395665994776 | 0.031871711 |
| *RDH10* | 0.133390145892361 | 0.031878861 |
| *MYT1L* | 0.133386405859994 | 0.031883706 |
| *MRGPRE* | -0.1333737500 | 0.031900105 |
| *UBE2R2* | -0.1333623045 | 0.031914941 |
| *MMP7* | 0.133331502182334 | 0.0319549 |
| *EDF1* | -0.1333175716 | 0.031972985 |
| *ZNF187* | -0.1332962170 | 0.032000726 |
| *TMEM71* | 0.133292806890314 | 0.032005158 |
| *SCARNA6* | -0.1332889707 | 0.032010144 |
| *CAPSL* | 0.133282047615054 | 0.032019144 |
| *C1orf113* | 0.133262632247636 | 0.032044396 |
| *SCARNA15* | 0.133260010478182 | 0.032047807 |
| *BARX1* | 0.133258874617077 | 0.032049285 |
| *CNBP* | -0.1332426028 | 0.032070464 |
| *LY96* | -0.1332404174 | 0.032073309 |
| *MAD2L1BP* | 0.133232701316041 | 0.032083357 |
| *KRT222* | -0.1332285934 | 0.032088708 |
| *CARD18* | 0.133224993807499 | 0.032093397 |
| *C1orf128* | 0.133218062564566 | 0.032102427 |
| *RASGRP4* | -0.1331892679 | 0.032139967 |
| *LHX9* | 0.133186346366731 | 0.032143778 |
| *ABI3BP* | -0.1331849622 | 0.032145583 |
| *SMOX* | 0.133175587051922 | 0.032157816 |
| *CCDC93* | 0.133160564417066 | 0.032177425 |
| *OR10J1* | -0.1331484701 | 0.032193219 |
| *UGGT1* | 0.133124368601838 | 0.032224713 |
| *TGM7* | 0.133113305456672 | 0.032239178 |
| *C1orf194* | -0.1331037522 | 0.032251674 |
| *CARNS1* | -0.1330853633 | 0.032275738 |
| *USP22* | 0.133084393532024 | 0.032277007 |
| *C3orf42* | 0.133066208743036 | 0.03230082 |
| *PDP2* | 0.13305855084824 | 0.032310853 |
| *OR2G6* | -0.1330567569 | 0.032313203 |
| *NT5C3L* | -0.1330349409 | 0.0323418 |
| *MFHAS1* | 0.133027344705884 | 0.032351763 |
| *C14orf64* | -0.1330197529 | 0.032361722 |
| *CTNNAL1* | 0.133009737396319 | 0.032374865 |
| *RASSF2* | -0.1329975437 | 0.032390872 |
| *ZNF597* | -0.1329817147 | 0.032411661 |
| *PPP1R16A* | -0.1329786985 | 0.032415624 |
| *SSX7* | 0.132971696718442 | 0.032424824 |
| *MERTK* | -0.1329680778 | 0.03242958 |
| *FZD6* | 0.132948298858453 | 0.032455586 |
| *SUMO2* | 0.132926415332532 | 0.032484379 |
| *ZCCHC6* | 0.132916359144572 | 0.032497618 |
| *NR0B1* | 0.13290336211813 | 0.032514735 |
| *NOL6* | 0.132872220552308 | 0.032555779 |
| *TTLL10* | -0.1328639898 | 0.032566635 |
| *PHKG1* | -0.1328597023 | 0.032572291 |
| *HEMGN* | -0.1328493979 | 0.032585887 |
| *TTLL1* | -0.1328455040 | 0.032591027 |
| *PBRM1* | 0.132826873440469 | 0.032615625 |
| *WFDC10B* | -0.1328087070 | 0.032639627 |
| *LOC100288778* | -0.1327792901 | 0.032678524 |
| *TMEM63C* | 0.132761329850362 | 0.032702291 |
| *NOL7* | 0.132741397608319 | 0.032728686 |
| *LOC145845* | -0.1327244544 | 0.032751136 |
| *FST* | -0.1327217905 | 0.032754667 |
| *IGLON5* | 0.132714077514526 | 0.032764893 |
| *WNT1* | 0.132711026784087 | 0.032768938 |
| *SSBP2* | -0.1327100006 | 0.032770299 |
| *TCF7L2* | -0.1327069989 | 0.032774279 |
| *ISYNA1* | -0.1326905515 | 0.032796099 |
| *PLUNC* | -0.1326801773 | 0.032809868 |
| *ATP6V1H* | -0.1326568883 | 0.032840795 |
| *TLR1* | -0.1326518769 | 0.032847454 |
| *HTR2A* | -0.1326451745 | 0.032856361 |
| *ZNF649* | -0.1326448212 | 0.03285683 |
| *EIF2S3* | 0.132621824589975 | 0.032887407 |
| *MYH7* | 0.132615277788142 | 0.032896116 |
| *BRSK1* | -0.1326127940 | 0.03289942 |
| *KLRF1* | -0.1325903639 | 0.032929276 |
| *GBE1* | 0.132586618412678 | 0.032934264 |
| *SLC15A2* | -0.1325754472 | 0.032949144 |
| *C18orf45* | 0.132572500086468 | 0.03295307 |
| *SLC35D3* | 0.132556249048244 | 0.032974729 |
| *GALNT12* | -0.1325205684 | 0.033022326 |
| *LPAR2* | 0.132516586213838 | 0.033027641 |
| *DPH1* | 0.132503462458029 | 0.033045165 |
| *CRBN* | -0.1324852433 | 0.033069505 |
| *C22orf45* | 0.132464956209125 | 0.033096626 |
| *LOC728989* | 0.132450332863815 | 0.033116188 |
| *C12orf26* | -0.1324409839 | 0.033128699 |
| *OR1B1* | 0.132439985088233 | 0.033130035 |
| *OR2A25* | -0.1324319528 | 0.033140788 |
| *NRL* | 0.132423216204546 | 0.033152487 |
| *SKIV2L2* | 0.13242214967975 | 0.033153915 |
| *NEU3* | 0.132410743471336 | 0.033169194 |
| *TMF1* | 0.132409845766944 | 0.033170397 |
| *SCO1* | 0.132409441937553 | 0.033170938 |
| *COX6B2* | 0.132384205180751 | 0.033204767 |
| *COPG2* | 0.13233141271383 | 0.033275629 |
| *UAP1L1* | 0.13232092899148 | 0.033289716 |
| *IGF1* | -0.1323021638 | 0.033314944 |
| *PSMB7* | 0.132241250687089 | 0.033396947 |
| *HSF2* | 0.132239745765863 | 0.033398975 |
| *OR2A9P* | -0.1322346203 | 0.033405884 |
| *HMBOX1* | 0.13219927432664 | 0.033453557 |
| *FAM198B* | -0.1321837217 | 0.033474553 |
| *ZDHHC24* | -0.1321823333 | 0.033476427 |
| *ZNF846* | -0.1321767935 | 0.033483909 |
| *COMMD2* | 0.132156204399026 | 0.033511727 |
| *VCX3A* | 0.132155108230541 | 0.033513209 |
| *WFDC6* | 0.132120451300783 | 0.03356008 |
| *ZNF417* | 0.132088269335642 | 0.033603654 |
| *EPHA8* | -0.1320811349 | 0.03361332 |
| *FAM46C* | -0.1320759121 | 0.033620398 |
| *ASFMR1* | 0.132061788759879 | 0.033639544 |
| *KHDC1* | 0.132058104252735 | 0.033644541 |
| *CYP4F2* | -0.1320326405 | 0.033679088 |
| *HYDIN* | -0.1320249778 | 0.03368949 |
| *ZNHIT1* | -0.1320188969 | 0.033697747 |
| *THOC1* | 0.132005812007022 | 0.03371552 |
| *SMARCAD1* | 0.132001210424491 | 0.033721772 |
| *AHCYL2* | 0.131981082604314 | 0.033749131 |
| *AKAP8L* | 0.131966086704193 | 0.033769526 |
| *PRSSL1* | -0.1319543677 | 0.033785472 |
| *C9orf123* | -0.1319270734 | 0.033822636 |
| *KCNK1* | -0.1319256152 | 0.033824623 |
| *CXorf61* | 0.131907159038742 | 0.033849774 |
| *YAP1* | -0.1318977593 | 0.033862589 |
| *ATXN7* | 0.131881111702179 | 0.033885296 |
| *ITGA1* | -0.1318772027 | 0.03389063 |
| *NRAP* | 0.131841904805859 | 0.033938825 |
| *ELOVL1* | 0.131810599655122 | 0.033981618 |
| *BCL2L11* | 0.131799758444324 | 0.033996448 |
| *HNRNPF* | 0.131778375158709 | 0.034025715 |
| *PIN4* | 0.131772049898401 | 0.034034376 |
| *HMG20B* | -0.1317569071 | 0.03405512 |
| *EFHB* | -0.1317336140 | 0.034087048 |
| *PRLR* | -0.1317325399 | 0.034088521 |
| *DUOXA1* | -0.1316758753 | 0.034166303 |
| *HSD17B7* | 0.13167546950999 | 0.03416686 |
| *SSX2* | 0.131671929355427 | 0.034171725 |
| *NELL2* | 0.131642911054798 | 0.034211621 |
| *PAX5* | 0.13163115195777 | 0.034227799 |
| *YWHAZ* | 0.131609288687712 | 0.034257896 |
| *BEAN* | 0.13160849481046 | 0.03425899 |
| *DDX52* | 0.131595000968303 | 0.034277577 |
| *FTH1* | -0.1315901481 | 0.034284264 |
| *ORC3L* | 0.131577817855699 | 0.034301259 |
| *BSG* | -0.1315741957 | 0.034306253 |
| *DEFA6* | -0.1315434280 | 0.034348697 |
| *AHNAK* | -0.1315077228 | 0.034398008 |
| *MMP11* | 0.131457665790196 | 0.034467241 |
| *AACSL* | 0.131446199458578 | 0.034483117 |
| *CRIPAK* | -0.1314397354 | 0.034492069 |
| *OBFC1* | -0.1313721758 | 0.034585755 |
| *TPO* | -0.1313552667 | 0.034609237 |
| *NCRNA00152* | 0.131351083126841 | 0.034615048 |
| *CCL18* | 0.131324466241599 | 0.034652044 |
| *FBLN5* | -0.1313241947 | 0.034652422 |
| *RPL10L* | 0.131262820300142 | 0.034737857 |
| *DNAH10* | 0.131252271805892 | 0.034752559 |
| *NDUFV3* | -0.1312411526 | 0.034768062 |
| *OR7E91P* | 0.131240158527462 | 0.034769448 |
| *EIF3B* | 0.131211425581692 | 0.034809538 |
| *C6orf81* | -0.1311641155 | 0.034875633 |
| *TPRN* | 0.131153163110174 | 0.034890949 |
| *C14orf147* | 0.131147261139209 | 0.034899205 |
| *GPN3* | 0.131128104382967 | 0.034926014 |
| *FAM162B* | -0.1311055914 | 0.034957542 |
| *NRSN2* | -0.1310992911 | 0.034966369 |
| *IQUB* | -0.1310797515 | 0.034993758 |
| *HS2ST1* | 0.131072522033711 | 0.035003897 |
| *TMEM231* | -0.1310626056 | 0.035017808 |
| *ZNF420* | 0.131057594549885 | 0.035024839 |
| *NEAT1* | -0.1310533133 | 0.035030847 |
| *DCAF4* | 0.131037357814236 | 0.035053246 |
| *LOC100134713* | 0.131032491721899 | 0.035060079 |
| *NKIRAS1* | -0.1310276636 | 0.035066861 |
| *FRMD8* | 0.131024733655797 | 0.035070977 |
| *USPL1* | 0.131024163860908 | 0.035071777 |
| *TMEM232* | -0.1310237785 | 0.035072319 |
| *TAOK1* | 0.130995553806787 | 0.03511199 |
| *DDR2* | 0.130994973653461 | 0.035112806 |
| *SNORA31* | -0.1309847957 | 0.035127121 |
| *FAHD1* | -0.1309789926 | 0.035135285 |
| *C20orf191* | 0.130955696206425 | 0.035168076 |
| *CHIT1* | 0.130953271588956 | 0.035171491 |
| *CASP1* | -0.1309099766 | 0.035232505 |
| *FAM66E* | -0.1309057020 | 0.035238534 |
| *NOTUM* | 0.130900700724321 | 0.035245589 |
| *KIAA1804* | 0.13089544484004 | 0.035253005 |
| *TP53I11* | -0.1308951945 | 0.035253358 |
| *SNORD15B* | -0.1308664061 | 0.035293999 |
| *MUC1* | -0.1308645789 | 0.03529658 |
| *C6orf26* | 0.130843354664556 | 0.03532657 |
| *NPHS1* | 0.130832463257758 | 0.035341968 |
| *BRE* | -0.1308226685 | 0.03535582 |
| *GPR21* | -0.1307929857 | 0.035397827 |
| *PIAS2* | 0.130767981912859 | 0.035433246 |
| *KTN1* | 0.130766489503077 | 0.035435361 |
| *PPP2CB* | -0.1306358217 | 0.035620954 |
| *ZNF192* | 0.130607946671522 | 0.035660653 |
| *ERCC5* | -0.1305951276 | 0.035678922 |
| *BOD1* | 0.13057465011987 | 0.035708122 |
| *YTHDC2* | 0.130568584103002 | 0.035716776 |
| *TEC* | 0.130562797742313 | 0.035725032 |
| *ACTG1* | 0.130482810319652 | 0.035839331 |
| *MC2R* | -0.1304711741 | 0.035855984 |
| *PRAMEF2* | 0.130447326657369 | 0.035890134 |
| *CDKL3* | -0.1304441217 | 0.035894726 |
| *FAM113B* | -0.1304329827 | 0.035910689 |
| *TNFRSF25* | -0.1304311711 | 0.035913285 |
| *HLA-DPB1* | -0.1304158853 | 0.035935202 |
| *GABBR1* | -0.1303937775 | 0.035966919 |
| *CSNK1E* | 0.130388455588845 | 0.035974558 |
| *LCAT* | -0.1303863234 | 0.035977619 |
| *TLR6* | 0.130375019411076 | 0.035993849 |
| *RNF11* | -0.1303618230 | 0.036012805 |
| *PABPC5* | -0.1302918113 | 0.036113514 |
| *CUX1* | -0.1302911802 | 0.036114423 |
| *KRT1* | -0.1302797834 | 0.03613084 |
| *PTGR2* | -0.1302752489 | 0.036137374 |
| *BCL2L10* | 0.130265041560528 | 0.036152085 |
| *MORN3* | -0.1302609546 | 0.036157976 |
| *LYVE1* | -0.1302486831 | 0.036175671 |
| *LOC286238* | -0.1302079729 | 0.036234427 |
| *MRPL19* | 0.130198245530525 | 0.036248478 |
| *C6orf118* | 0.130188430658626 | 0.03626266 |
| *SNORA67* | 0.130181741195018 | 0.036272329 |
| *SEC61A1* | 0.130168180554565 | 0.036291935 |
| *ATF2* | 0.130165310893787 | 0.036296086 |
| *ZNF767* | -0.1301651013 | 0.036296389 |
| *PPP2R5B* | -0.1301351530 | 0.036339726 |
| *AP3D1* | 0.130134667288257 | 0.036340429 |
| *PTGFR* | 0.130094429971297 | 0.036398726 |
| *ZDHHC22* | 0.130048904254971 | 0.036464779 |
| *SMAD4* | -0.1300442004 | 0.03647161 |
| *TIGD5* | 0.130041251892171 | 0.036475892 |
| *PRTG* | 0.130029618012642 | 0.036492793 |
| *NAGS* | 0.130019623405127 | 0.036507317 |
| *ZNF564* | -0.1300124985 | 0.036517674 |
| *ZNF816A* | 0.129996199834835 | 0.036541376 |
| *IRF2BP2* | -0.1299954644 | 0.036542445 |
| *NBEA* | -0.1299681379 | 0.036582214 |
| *STRADB* | 0.129963513719861 | 0.036588947 |
| *SYT16* | 0.129934879310581 | 0.036630665 |
| *SNX24* | 0.129933014351058 | 0.036633384 |
| *OGFRL1* | 0.129932556514798 | 0.036634051 |
| *GRHL1* | 0.129925839993504 | 0.036643843 |
| *PPFIBP2* | -0.1299045441 | 0.036674905 |
| *ZNF204P* | -0.1298955024 | 0.0366881 |
| *INTS10* | -0.1298881665 | 0.036698808 |
| *SLC12A2* | 0.129887816182574 | 0.03669932 |
| *MIR155HG* | 0.129881501487113 | 0.03670854 |
| *USP43* | 0.129878857916309 | 0.0367124 |
| *C9orf152* | 0.129872777521698 | 0.036721281 |
| *TUBA3C* | 0.129870480557536 | 0.036724636 |
| *HIP1R* | -0.1298657347 | 0.036731569 |
| *C6* | -0.1298569739 | 0.036744371 |
| *EIF1B* | -0.1298420691 | 0.036766159 |
| *IAH1* | -0.1298363621 | 0.036774504 |
| *PLAC9* | -0.1298353519 | 0.036775982 |
| *LOC153328* | 0.129834537821585 | 0.036777172 |
| *ETNK1* | 0.129805471030928 | 0.036819705 |
| *KLHL25* | 0.1297835279532 | 0.036851841 |
| *MAX* | -0.1297778245 | 0.036860198 |
| *HSPE1* | 0.129766750065703 | 0.036876429 |
| *CRYBB3* | -0.1297615041 | 0.03688412 |
| *CLDN18* | 0.129750599418556 | 0.03690011 |
| *AK5* | 0.129728654956348 | 0.036932308 |
| *DMD* | -0.1297002608 | 0.036974004 |
| *KAAG1* | 0.12969922741481 | 0.036975523 |
| *COL5A3* | 0.129663331844564 | 0.037028293 |
| *DEFB129* | -0.1296625030 | 0.037029512 |
| *KIAA1530* | 0.129613419396222 | 0.037101776 |
| *C6orf97* | -0.1295989846 | 0.037123051 |
| *GIMAP6* | -0.1295876847 | 0.037139712 |
| *NOD1* | -0.1295844375 | 0.037144501 |
| *ASXL2* | 0.129573588938151 | 0.037160505 |
| *STOML3* | 0.129514678965691 | 0.03724751 |
| *PCSK4* | -0.1295109681 | 0.037252996 |
| *FAM47C* | 0.12949857973346 | 0.037271317 |
| *RASSF6* | 0.129438304186558 | 0.037360565 |
| *NTS* | 0.129434977465999 | 0.037365496 |
| *SREBF1* | -0.1294305098 | 0.037372119 |
| *BTF3* | -0.1294249473 | 0.037380366 |
| *MRPS23* | 0.129411185105991 | 0.037400778 |
| *KRBA1* | -0.1294110416 | 0.037400991 |
| *AHRR* | 0.129409724315529 | 0.037402945 |
| *ATP9A* | -0.1294015039 | 0.037415143 |
| *RAB9BP1* | 0.129386624433768 | 0.037437229 |
| *ZNF648* | 0.129386362605077 | 0.037437618 |
| *UGT8* | 0.129374723898421 | 0.037454902 |
| *MTHFD1L* | 0.129364035424689 | 0.037470781 |
| *C11orf31* | -0.1293517383 | 0.037489057 |
| *C20orf30* | -0.1293216943 | 0.037533739 |
| *SCGB3A2* | 0.129303068429191 | 0.037561463 |
| *LTK* | 0.129278513630012 | 0.037598038 |
| *TMEM35* | -0.1292742714 | 0.03760436 |
| *TBC1D16* | 0.129272373310952 | 0.037607188 |
| *SPOCK2* | -0.1292182881 | 0.037687872 |
| *FBXO42* | 0.129216162110293 | 0.037691047 |
| *SLC6A13* | -0.1291980698 | 0.037718071 |
| *MAGEA5* | 0.129183305397354 | 0.037740137 |
| *WDR83* | -0.1291771285 | 0.037749372 |
| *DNAJB3* | 0.129168598413324 | 0.037762128 |
| *FAM19A2* | -0.1291433039 | 0.037799976 |
| *LOC730101* | 0.129136068181253 | 0.037810808 |
| *C5orf35* | 0.129126192635563 | 0.037825597 |
| *TNFRSF12A* | 0.129104497685127 | 0.037858102 |
| *C1orf122* | -0.1290552030 | 0.037932049 |
| *NDST2* | -0.1290308509 | 0.037968624 |
| *ARHGAP6* | -0.1290251435 | 0.0379772 |
| *C17orf89* | -0.1290216561 | 0.037982442 |
| *TSTD1* | -0.1290072026 | 0.038004171 |
| *COL6A2* | -0.1289998067 | 0.038015294 |
| *SLMO1* | 0.128977544493829 | 0.038048791 |
| *ZNF808* | 0.12896622997791 | 0.038065825 |
| *CAB39* | -0.1289562458 | 0.038080862 |
| *TEX13B* | 0.128949053183771 | 0.038091697 |
| *C6orf217* | -0.1288988559 | 0.038167391 |
| *NMS* | 0.128887660933965 | 0.03818429 |
| *ARHGAP39* | 0.128886036275882 | 0.038186743 |
| *ZNF252* | -0.1288695099 | 0.038211702 |
| *CCDC68* | -0.1288484412 | 0.038243541 |
| *GPR34* | -0.1288262630 | 0.038277081 |
| *IGFBP1* | 0.128823139320656 | 0.038281807 |
| *CDKL4* | 0.128816375611263 | 0.038292042 |
| *MGC23284* | -0.1288112769 | 0.038299759 |
| *RNF114* | 0.128774112761856 | 0.038356046 |
| *BAG2* | -0.1287713637 | 0.038360212 |
| *PANX3* | 0.128770609355861 | 0.038361356 |
| *IFI30* | 0.128762084676547 | 0.038374278 |
| *ZNF574* | 0.12875305445292 | 0.038387971 |
| *ACTR1A* | -0.1287216886 | 0.038435564 |
| *MAML1* | 0.128699633694712 | 0.038469059 |
| *PLAG1* | 0.128662626544625 | 0.038525318 |
| *FNIP2* | 0.128661188676377 | 0.038527505 |
| *ARHGAP28* | 0.128633186523206 | 0.038570122 |
| *PRAC* | 0.12862495738984 | 0.038582654 |
| *C1QTNF8* | -0.1286126789 | 0.038601359 |
| *TMEM18* | -0.1285791320 | 0.038652502 |
| *HTR6* | 0.128578783489546 | 0.038653034 |
| *RAET1E* | 0.128574891345159 | 0.038658971 |
| *ZNF253* | 0.128574616557567 | 0.038659391 |
| *C1orf183* | -0.1285471612 | 0.038701296 |
| *LOC645166* | 0.128544824450652 | 0.038704864 |
| *DET1* | 0.1285362696869 | 0.038717931 |
| *PYCARD* | -0.1285345175 | 0.038720607 |
| *DYTN* | 0.12852668903788 | 0.038732568 |
| *FAM104B* | 0.128523931524161 | 0.038736782 |
| *LOC100134259* | -0.1285136879 | 0.038752439 |
| *APOL2* | -0.1285107592 | 0.038756916 |
| *DCBLD2* | 0.128494531597106 | 0.038781733 |
| *TRIM63* | -0.1284766385 | 0.038809112 |
| *ZNF517* | -0.1284695864 | 0.038819907 |
| *GJC1* | 0.12845564900301 | 0.03884125 |
| *FAM86B1* | -0.1284547709 | 0.038842595 |
| *DGKK* | 0.128437994140462 | 0.038868299 |
| *ASAM* | 0.128388204127554 | 0.03894467 |
| *METTL4* | 0.128385319806773 | 0.038949098 |
| *C7orf27* | 0.128336250491105 | 0.039024494 |
| *C15orf37* | -0.1283314701 | 0.039031846 |
| *PVRL3* | 0.128326124672174 | 0.039040068 |
| *LAMP3* | 0.128314913666924 | 0.039057317 |
| *FLJ45445* | 0.128298684714909 | 0.039082298 |
| *KIAA1609* | 0.128297733988539 | 0.039083762 |
| *ARHGAP25* | -0.1282915392 | 0.039093301 |
| *NPTX1* | -0.1282749567 | 0.039118846 |
| *ST6GALNAC2* | -0.1282657016 | 0.03913311 |
| *FAM164C* | -0.1282541013 | 0.039150994 |
| *PNPLA6* | -0.1282429635 | 0.039168172 |
| *NDFIP2* | 0.128227906239618 | 0.039191404 |
| *PNO1* | 0.128214015396376 | 0.039212847 |
| *SCARNA9L* | 0.128149408124335 | 0.039312711 |
| *LIPJ* | 0.128133585033018 | 0.039337201 |
| *CCDC47* | 0.128129248574958 | 0.039343915 |
| *NTRK2* | -0.1281046927 | 0.039381953 |
| *SLC2A9* | -0.1281010436 | 0.039387608 |
| *NECAB3* | -0.1280934595 | 0.039399364 |
| *C5* | 0.128090663794958 | 0.039403698 |
| *NQO1* | -0.1280903357 | 0.039404207 |
| *NQO2* | -0.1280753462 | 0.039427452 |
| *TMEM132C* | -0.1280634469 | 0.039445914 |
| *UTP23* | 0.128062752358746 | 0.039446992 |
| *ARFIP2* | -0.1280318888 | 0.039494911 |
| *NARFL* | -0.1280264841 | 0.039503307 |
| *PRDX5* | -0.1280255214 | 0.039504803 |
| *THAP7* | -0.1280054571 | 0.039535988 |
| *RRP15* | 0.127993233881146 | 0.039554996 |
| *SCN2A* | -0.1279459176 | 0.03962865 |
| *SH2D1B* | -0.1279450502 | 0.039630002 |
| *CYP2S1* | 0.127925503902555 | 0.039660462 |
| *MRPS25* | -0.1279159069 | 0.039675426 |
| *C7orf43* | 0.12790946587122 | 0.039685471 |
| *GCFC1* | 0.127906969545003 | 0.039689365 |
| *LCE1A* | 0.127866740718222 | 0.039752158 |
| *C9orf102* | 0.127801660546111 | 0.039853919 |
| *DAP3* | 0.127783170010782 | 0.039882872 |
| *CBL* | 0.127760143011745 | 0.039918952 |
| *RIMKLB* | -0.1277589910 | 0.039920758 |
| *CD7* | -0.1277511741 | 0.039933013 |
| *MAGI3* | 0.127730733338924 | 0.039965073 |
| *CLCN7* | -0.1276688863 | 0.040062211 |
| *JUNB* | -0.1276687790 | 0.040062379 |
| *CSNK1G3* | 0.127629476450004 | 0.040124212 |
| *APBA3* | -0.1276223759 | 0.040135391 |
| *ZKSCAN1* | 0.127612604331103 | 0.04015078 |
| *CYP2F1* | 0.127612114816089 | 0.040151551 |
| *MTUS2* | -0.1276076208 | 0.040158631 |
| *BCAS4* | 0.127603398139666 | 0.040165284 |
| *KIF26B* | 0.127594102831384 | 0.040179932 |
| *SLC47A1* | -0.1275886407 | 0.040188542 |
| *KRT13* | -0.1275843441 | 0.040195315 |
| *SLC33A1* | 0.127572282038516 | 0.040214336 |
| *TLX1* | 0.127570263106365 | 0.040217521 |
| *CDHR3* | 0.127538374002204 | 0.040267848 |
| *SERPINH1* | 0.127527431147891 | 0.04028513 |
| *ITIH1* | -0.1275139280 | 0.040306464 |
| *BMP10* | 0.127479440377264 | 0.040360995 |
| *UPF1* | 0.127476198544507 | 0.040366125 |
| *ZFAND5* | -0.1274678761 | 0.040379295 |
| *HPR* | -0.1274504944 | 0.040406812 |
| *FAM188B* | -0.1274369999 | 0.040428187 |
| *XKR5* | 0.127434270133443 | 0.040432512 |
| *SARM1* | -0.1274229524 | 0.040450448 |
| *ZKSCAN5* | 0.127374934534942 | 0.040526619 |
| *FAIM3* | -0.1273704352 | 0.040533763 |
| *APOL3* | -0.1273434795 | 0.040576582 |
| *USP35* | -0.1273403690 | 0.040581526 |
| *PLEKHA9* | 0.127314842844548 | 0.040622113 |
| *LOXL4* | -0.1273001125 | 0.040645551 |
| *C8orf47* | 0.127297335511964 | 0.040649971 |
| *PCDH12* | -0.1272755802 | 0.04068461 |
| *KIAA2022* | -0.1272754609 | 0.0406848 |
| *SPTAN1* | -0.1272506152 | 0.04072439 |
| *ALDH4A1* | -0.1272454829 | 0.040732572 |
| *PPFIA1* | 0.127231614533259 | 0.040754688 |
| *THRB* | -0.1272273899 | 0.040761427 |
| *C1orf50* | -0.1272072266 | 0.040793605 |
| *C1orf141* | -0.1272043433 | 0.040798208 |
| *HIST1H2AA* | -0.1271960423 | 0.040811462 |
| *SLC16A12* | 0.12714385067012 | 0.040894882 |
| *GRIN2D* | 0.127136765540616 | 0.040906218 |
| *FHL2* | -0.1271331101 | 0.040912067 |
| *EP400* | 0.127110236861766 | 0.040948684 |
| *PGAP2* | -0.1270524884 | 0.041041256 |
| *TMEM179B* | -0.1270513841 | 0.041043028 |
| *SULF2* | -0.1270459238 | 0.04105179 |
| *ANGPT4* | -0.1270413956 | 0.041059058 |
| *IRX5* | 0.127040869156834 | 0.041059903 |
| *ANXA3* | -0.1270152530 | 0.041101038 |
| *FAM106A* | 0.127010982536617 | 0.041107899 |
| *TOX* | 0.127001405376201 | 0.041123289 |
| *SEPT7* | 0.126994886265559 | 0.041133768 |
| *C18orf56* | 0.126991881232446 | 0.041138599 |
| *BBS12* | -0.1269891156 | 0.041143046 |
| *DRAM1* | -0.1269817659 | 0.041154864 |
| *PRIC285* | 0.126968885386844 | 0.041175584 |
| *HBBP1* | 0.12695274044418 | 0.041201568 |
| *CNFN* | 0.12694326855538 | 0.041216818 |
| *TNIP3* | 0.126923568834003 | 0.041248551 |
| *ZNF226* | -0.1269179560 | 0.041257596 |
| *C11orf94* | 0.126902496864335 | 0.041282517 |
| *AGPAT6* | 0.12689038634823 | 0.041302049 |
| *C3orf65* | 0.126884902513885 | 0.041310896 |
| *FAM187B* | -0.1268754969 | 0.041326074 |
| *HOXC12* | 0.12684618930725 | 0.041373396 |
| *MRPL14* | 0.126841063858081 | 0.041381677 |
| *DLL4* | -0.1268365213 | 0.041389017 |
| *PLAT* | -0.1268253427 | 0.041407084 |
| *F12* | 0.126798420567421 | 0.041450625 |
| *TBC1D22B* | 0.126769582465018 | 0.041497307 |
| *RND3* | 0.126762802146956 | 0.04150829 |
| *DIRAS3* | -0.1267422514 | 0.041541591 |
| *C3* | -0.1267159070 | 0.041584313 |
| *GPC3* | 0.126713580628256 | 0.041588088 |
| *CORO2A* | 0.126707074094856 | 0.041598646 |
| *E2F4* | 0.126702814874771 | 0.041605558 |
| *MTHFR* | -0.1266812935 | 0.041640502 |
| *ANO5* | -0.1266797511 | 0.041643007 |
| *XKR7* | 0.126634408202312 | 0.041716713 |
| *EIF4A1* | 0.126624706292307 | 0.041732498 |
| *TRPA1* | 0.126616986054383 | 0.041745063 |
| *KLF16* | 0.126587145435184 | 0.041793657 |
| *MPV17* | -0.1265691030 | 0.041823062 |
| *HLA-L* | 0.126565319606065 | 0.04182923 |
| *C7orf45* | 0.1265612568603 | 0.041835855 |
| *SNAR-A3* | -0.1265487926 | 0.041856184 |
| *RTP3* | 0.126530005848703 | 0.04188684 |
| *KIAA0831* | -0.1265293579 | 0.041887898 |
| *CARD6* | -0.1264996265 | 0.041936454 |
| *CLCNKB* | -0.1264984840 | 0.04193832 |
| *TRPM3* | -0.1264804054 | 0.04196787 |
| *KCNV1* | 0.126447800873358 | 0.042021206 |
| *MED30* | 0.126445773341526 | 0.042024525 |
| *MRPL1* | -0.1264351931 | 0.042041846 |
| *RFTN2* | -0.1264090872 | 0.04208461 |
| *KIAA1432* | 0.126400053558458 | 0.042099416 |
| *SNORA46* | -0.1263996858 | 0.042100019 |
| *DNAH5* | 0.126368963027041 | 0.042150408 |
| *ATF1* | 0.126338218330835 | 0.042200885 |
| *C6orf35* | -0.1263123409 | 0.042243409 |
| *SIRPB1* | 0.126304086055937 | 0.042256982 |
| *CYB5D1* | -0.1263015366 | 0.042261175 |
| *CXCR7* | -0.1262990112 | 0.042265328 |
| *C14orf153* | 0.126277735574354 | 0.042300333 |
| *TIGD3* | 0.126268864692483 | 0.042314935 |
| *CLDN11* | -0.1262430335 | 0.04235748 |
| *DNASE2* | -0.1262326001 | 0.042374674 |
| *CCNB1IP1* | 0.126231501942383 | 0.042376484 |
| *F11* | -0.1261959561 | 0.042435111 |
| *C17orf82* | -0.1261883470 | 0.042447669 |
| *UBE2L6* | -0.1261729883 | 0.042473028 |
| *TMEM51* | 0.126172481683712 | 0.042473865 |
| *MLNR* | 0.12616252586593 | 0.04249031 |
| *C7orf55* | -0.1261537766 | 0.042504766 |
| *MYC* | 0.126131979997904 | 0.042540799 |
| *PFDN6* | 0.126129055853746 | 0.042545635 |
| *DSP* | 0.126122725908513 | 0.042556105 |
| *AKIRIN1* | 0.126087608986621 | 0.04261423 |
| *GPR137* | -0.1260846402 | 0.042619147 |
| *PDZD4* | -0.1260509755 | 0.042674936 |
| *NME6* | 0.126041520846003 | 0.042690616 |
| *NTNG2* | -0.1260362282 | 0.042699395 |
| *ST3GAL3* | -0.1260288571 | 0.042711624 |
| *EMID2* | 0.126025854135619 | 0.042716607 |
| *CSNK2B* | 0.126022113207039 | 0.042722816 |
| *TARBP1* | 0.126008413748129 | 0.042745557 |
| *POM121L4P* | -0.1259955351 | 0.042766946 |
| *USP5* | -0.1259899563 | 0.042776214 |
| *C2orf73* | -0.1259638380 | 0.042819626 |
| *TDRD1* | 0.125963252660791 | 0.042820599 |
| *CPA6* | -0.1259602637 | 0.042825569 |
| *PRKAG1* | -0.1259589475 | 0.042827758 |
| *GRAMD2* | 0.125955692002939 | 0.042833173 |
| *CACNB1* | -0.1259495282 | 0.042843426 |
| *LOC388242* | -0.1259463762 | 0.04284867 |
| *STX19* | -0.1259381558 | 0.042862349 |
| *TBP* | 0.125916848567946 | 0.042897821 |
| *PRAMEF9* | -0.1259141668 | 0.042902288 |
| *ZRANB3* | 0.125913007453794 | 0.042904219 |
| *C19orf51* | 0.125908735224713 | 0.042911335 |
| *IFT57* | -0.1258906731 | 0.042941432 |
| *ADORA1* | -0.1258625564 | 0.042988319 |
| *MEG8* | 0.125843914037883 | 0.04301943 |
| *MPP5* | 0.125841984820633 | 0.043022651 |
| *SUFU* | -0.1258329375 | 0.043037757 |
| *OR2T6* | 0.125829430679617 | 0.043043614 |
| *SNRK* | -0.1258156672 | 0.043066606 |
| *MDGA2* | 0.125762026342101 | 0.043156312 |
| *ZNF479* | 0.125761108289856 | 0.043157849 |
| *SUMO1P1* | 0.125745502806711 | 0.043183977 |
| *IKBKB* | -0.1257088027 | 0.043245476 |
| *HMGN4* | 0.125704123904139 | 0.043253322 |
| *SEPT2* | -0.1256955491 | 0.043267703 |
| *KCNV2* | 0.125692151815307 | 0.043273403 |
| *C13orf38* | 0.125691029525338 | 0.043275285 |
| *ZNF320* | 0.125688741877905 | 0.043279123 |
| *CCDC163P* | 0.125687180288876 | 0.043281744 |
| *GPR39* | 0.125652034530784 | 0.043340748 |
| *FMNL1* | 0.125630375115226 | 0.043377145 |
| *VTI1A* | 0.125622332581421 | 0.043390667 |
| *HMHB1* | -0.1255956785 | 0.043435503 |
| *OR2T11* | -0.1255904208 | 0.043444352 |
| *KLF3* | 0.125576053969948 | 0.04346854 |
| *RTN4* | -0.1255744962 | 0.043471164 |
| *MSH3* | 0.125574348060812 | 0.043471413 |
| *PNKD* | -0.1255381679 | 0.043532379 |
| *NRG4* | 0.125520180939906 | 0.043562715 |
| *LOC642597* | 0.125508427455515 | 0.043582547 |
| *OR1D4* | -0.1255077079 | 0.043583762 |
| *PRMT8* | 0.125500441572957 | 0.043596027 |
| *PPOX* | -0.1254939385 | 0.043607006 |
| *IKBKAP* | 0.125491001786156 | 0.043611965 |
| *IFT140* | -0.1254776381 | 0.043634536 |
| *ZFP91-CNTF* | 0.125471329513242 | 0.043645195 |
| *F2RL1* | 0.125468707611929 | 0.043649625 |
| *C1orf55* | 0.125465599050278 | 0.043654879 |
| *AP3S1* | 0.125464817406926 | 0.0436562 |
| *DBNL* | -0.1254512389 | 0.043679154 |
| *UTP6* | 0.125375679902045 | 0.043807068 |
| *RYR1* | 0.125365408418203 | 0.043824481 |
| *KRT24* | -0.1253577778 | 0.043837421 |
| *MYH6* | 0.125339022807309 | 0.043869238 |
| *DDX42* | -0.1253312638 | 0.043882407 |
| *AQP7P1* | -0.1253021996 | 0.043931765 |
| *ANAPC5* | 0.125264698431731 | 0.04399552 |
| *IQSEC1* | -0.1252539385 | 0.044013827 |
| *HTR3D* | -0.1252391753 | 0.044038955 |
| *ACAP1* | -0.1252345207 | 0.04404688 |
| *C10orf81* | 0.125230352269204 | 0.044053979 |
| *LOC283761* | 0.12520721121422 | 0.044093403 |
| *LEMD2* | 0.125199366312026 | 0.044106774 |
| *LIMK1* | 0.125194160196869 | 0.04411565 |
| *RP1-177G6.2* | 0.125188243440342 | 0.044125739 |
| *EIF2A* | -0.1251631081 | 0.044168621 |
| *FAM48B1* | -0.1251295288 | 0.044225962 |
| *SNORA71D* | 0.125116270329829 | 0.04424862 |
| *OR1K1* | -0.1250985707 | 0.044278883 |
| *SALL2* | -0.1250919216 | 0.044290256 |
| *CYBASC3* | -0.1249718071 | 0.044496132 |
| *FBXL21* | 0.124958295766852 | 0.04451934 |
| *VASH1* | 0.124956032513152 | 0.044523229 |
| *LOC493754* | 0.124949558218728 | 0.044534354 |
| *FXYD4* | -0.1249456087 | 0.044541142 |
| *PDIA3* | 0.124941271550785 | 0.044548597 |
| *C14orf179* | -0.1249353106 | 0.044558845 |
| *RDH12* | 0.124918091699481 | 0.044588459 |
| *ZNF837* | -0.1249029051 | 0.044614591 |
| *EFHC2* | -0.1248962813 | 0.044625993 |
| *FAM127A* | -0.1248824261 | 0.044649851 |
| *WIPF1* | 0.124860373491643 | 0.044687846 |
| *GFPT1* | 0.124851969640048 | 0.044702332 |
| *RAPGEF1* | 0.124851770892242 | 0.044702675 |
| *C10orf58* | -0.1248315199 | 0.044737599 |
| *MAP4K5* | 0.124810329806053 | 0.044774168 |
| *BEND7* | -0.1248081833 | 0.044777873 |
| *ST3GAL2* | 0.12479608749533 | 0.04479876 |
| *C6orf70* | -0.1247765000 | 0.044832601 |
| *GIMAP4* | -0.1247577691 | 0.044864982 |
| *DKFZP586I1420* | 0.124753510257477 | 0.044872347 |
| *AMELX* | 0.124747461353177 | 0.044882809 |
| *PLD3* | -0.1247438878 | 0.044888991 |
| *MAP3K5* | -0.1247224382 | 0.044926113 |
| *C22orf13* | 0.124705212326554 | 0.044955943 |
| *PSIP1* | 0.124692945823548 | 0.044977195 |
| *TRIM61* | -0.1246836486 | 0.044993309 |
| *IFNAR1* | -0.1246330907 | 0.045081018 |
| *SOX1* | 0.124599901651743 | 0.045138673 |
| *RPE65* | -0.1245716917 | 0.045187727 |
| *LOC339524* | -0.1245618406 | 0.045204867 |
| *C17orf48* | -0.1245444780 | 0.045235091 |
| *HMBS* | 0.124536892524126 | 0.0452483 |
| *DRG1* | 0.124523288848512 | 0.045271998 |
| *SOCS5* | -0.1244973918 | 0.04531714 |
| *ATRN* | 0.124476778561416 | 0.045353099 |
| *DNTT* | 0.12446746058247 | 0.045369361 |
| *SCNN1G* | -0.1244482492 | 0.045402906 |
| *LOC407835* | 0.124434173133636 | 0.045427497 |
| *PPFIA3* | 0.124422516906146 | 0.045447869 |
| *SLC7A5P1* | 0.124422464341864 | 0.045447961 |
| *CTU2* | 0.124419621457679 | 0.045452931 |
| *GPR144* | -0.1243891981 | 0.045506144 |
| *RPS3* | -0.1243856187 | 0.045512408 |
| *APRT* | -0.1243790078 | 0.045523979 |
| *FUT5* | -0.1243755186 | 0.045530088 |
| *GPN1* | 0.124375366318444 | 0.045530354 |
| *C19orf59* | 0.124374598629677 | 0.045531698 |
| *ZNF429* | -0.1243655449 | 0.045547552 |
| *RRP12* | 0.124358586563288 | 0.045559739 |
| *FGA* | 0.124317826014822 | 0.045631185 |
| *CRISPLD1* | 0.124315873457282 | 0.04563461 |
| *P2RY4* | 0.124293993568814 | 0.045673003 |
| *PEX7* | -0.1242910116 | 0.045678237 |
| *ZNF584* | 0.124287747255369 | 0.045683968 |
| *GBP6* | 0.124275651870038 | 0.045705208 |
| *CDK10* | -0.1242425485 | 0.04576338 |
| *COL1A1* | 0.124235254670098 | 0.045776206 |
| *TXNL4B* | 0.124221906911209 | 0.045799685 |
| *PRKCSH* | 0.124210088523171 | 0.045820482 |
| *STON1-GTF2A1L* | -0.1241916254 | 0.045852988 |
| *ALOX12P2* | 0.124182972589369 | 0.045868229 |
| *DNAH3* | 0.124179809969957 | 0.045873801 |
| *MPDU1* | 0.124179433441943 | 0.045874464 |
| *MRPL11* | -0.1241769440 | 0.04587885 |
| *NR1D1* | -0.1241152549 | 0.045987651 |
| *ADCYAP1* | -0.1240799283 | 0.046050053 |
| *SULT2B1* | 0.124078632579528 | 0.046052344 |
| *FERMT2* | -0.1240497932 | 0.046103342 |
| *FOXI2* | -0.1240401112 | 0.046120473 |
| *RPS7* | -0.1240270648 | 0.046143567 |
| *TMEM50A* | 0.124022945605299 | 0.04615086 |
| *CSRNP1* | -0.1240131670 | 0.046168177 |
| *DVL2* | 0.123993187060286 | 0.046203578 |
| *ARHGEF5* | -0.1239803034 | 0.046226418 |
| *OR5K2* | -0.1239622435 | 0.046258449 |
| *LGALS13* | 0.123930091338475 | 0.046315521 |
| *LOC339290* | 0.123919908099689 | 0.046333609 |
| *TDO2* | 0.12391559754573 | 0.046341268 |
| *FBXL5* | -0.1239074091 | 0.046355819 |
| *SYNPR* | 0.123855811702088 | 0.046447597 |
| *FAM55A* | -0.1238410278 | 0.046473922 |
| *PRM3* | 0.123824507228092 | 0.046503354 |
| *CHPT1* | -0.1237772956 | 0.046587549 |
| *LPXN* | 0.123776056904382 | 0.04658976 |
| *C10orf95* | 0.123771984603214 | 0.046597028 |
| *FAM18B* | 0.123759112278142 | 0.04662001 |
| *RNASET2* | -0.1237534326 | 0.046630154 |
| *RG9MTD2* | 0.123751360152314 | 0.046633855 |
| *CPEB4* | -0.1237450516 | 0.046645125 |
| *KLRAQ1* | -0.1237386365 | 0.046656587 |
| *MTERFD3* | -0.1237291837 | 0.046673481 |
| *KLHL8* | 0.123721669513094 | 0.046686913 |
| *MEIS3P1* | -0.1237168960 | 0.046695449 |
| *NDEL1* | 0.123679998251782 | 0.046761467 |
| *CAPRIN1* | 0.123664790779202 | 0.046788699 |
| *CCR2* | -0.1236608197 | 0.046795812 |
| *KCNG3* | 0.123646102707236 | 0.046822182 |
| *P4HB* | 0.123637793598489 | 0.046837076 |
| *CGB* | 0.123631430714282 | 0.046848484 |
| *LOC285780* | 0.123619167778165 | 0.046870476 |
| *PPIL2* | 0.123602654739949 | 0.046900104 |
| *SLC43A3* | 0.123601720728909 | 0.046901781 |
| *ZNF785* | -0.1235727676 | 0.046953769 |
| *RXRB* | -0.1235653741 | 0.046967052 |
| *POC1B* | 0.123560838199184 | 0.046975203 |
| *SOX5* | -0.1235571666 | 0.046981802 |
| *HSPA2* | -0.1235465959 | 0.047000804 |
| *GMFG* | -0.1235450739 | 0.047003541 |
| *ZCCHC9* | 0.123533184526555 | 0.047024922 |
| *MT1IP* | 0.123511740629632 | 0.047063507 |
| *WDR89* | 0.123500634757047 | 0.0470835 |
| *BRPF3* | 0.123487969826898 | 0.047106309 |
| *SCYL1* | -0.1234869012 | 0.047108234 |
| *PDE8B* | -0.1234507515 | 0.047173391 |
| *KLF10* | 0.123436695214207 | 0.047198746 |
| *SSSCA1* | -0.1234240851 | 0.047221503 |
| *CCND2* | -0.1234105101 | 0.047246011 |
| *KCTD1* | -0.1233968977 | 0.047270597 |
| *C5orf42* | 0.123384922251065 | 0.047292236 |
| *NDNL2* | 0.12336829547423 | 0.047322292 |
| *GNLY* | -0.1233597626 | 0.047337724 |
| *LOC643719* | -0.1233571247 | 0.047342495 |
| *XIRP2* | 0.123327934085846 | 0.047395321 |
| *FOLH1* | 0.123286642173204 | 0.047470132 |
| *LOC100133050* | 0.123286432601175 | 0.047470512 |
| *GIMAP2* | -0.1232766053 | 0.047488331 |
| *SEC31B* | -0.1232751032 | 0.047491055 |
| *TMLHE* | -0.1232726593 | 0.047495487 |
| *LOC126536* | 0.123262654683312 | 0.047513636 |
| *ANKRD13D* | -0.1232505822 | 0.047535544 |
| *ZFPL1* | -0.1232440892 | 0.04754733 |
| *C9* | 0.123234481760276 | 0.047564774 |
| *LPIN2* | 0.123211121961443 | 0.04760721 |
| *CMAS* | 0.12320980087563 | 0.047609611 |
| *FZD1* | 0.123206946454351 | 0.047614799 |
| *C17orf59* | -0.1231417799 | 0.047733365 |
| *TM4SF1* | -0.1231218328 | 0.047769707 |
| *COL4A6* | -0.1231173971 | 0.047777792 |
| *ASB4* | 0.123101610272829 | 0.047806574 |
| *C1GALT1C1* | -0.1230925153 | 0.047823163 |
| *DNAJC6* | 0.123066837873702 | 0.047870023 |
| *CCR10* | -0.1230650548 | 0.047873278 |
| *FAM40A* | 0.123050481549557 | 0.047899892 |
| *AIMP1* | -0.1230375170 | 0.047923579 |
| *KIAA1328* | -0.1230365056 | 0.047925427 |
| *ARPC1A* | 0.123008959016754 | 0.047975789 |
| *AGPAT3* | 0.123004195664425 | 0.047984502 |
| *CRYGN* | -0.1229836233 | 0.048022148 |
| *A1BG* | -0.1229825515 | 0.04802411 |
| *PFN1* | 0.122979051394869 | 0.048030518 |
| *TRIM66* | -0.1229744470 | 0.048038948 |
| *EFNA1* | -0.1229614454 | 0.04806276 |
| *ACTR1B* | -0.1229603951 | 0.048064684 |
| *BRF1* | 0.122959547234711 | 0.048066237 |
| *DTX3* | -0.1229429915 | 0.048096574 |
| *C14orf79* | -0.1229378446 | 0.048106009 |
| *HOXA11* | 0.122933016160934 | 0.048114861 |
| *C6orf103* | 0.122923845743669 | 0.048131677 |
| *TMCO3* | 0.122920541060629 | 0.048137738 |
| *ADARB1* | -0.1229093535 | 0.048158262 |
| *SECISBP2* | 0.12288384681464 | 0.048205083 |
| *CPSF7* | 0.122855586571729 | 0.048257002 |
| *MMP19* | -0.1228403784 | 0.048284961 |
| *FBXO2* | -0.1228373981 | 0.048290442 |
| *CXorf42* | -0.1228369978 | 0.048291178 |
| *RPS6KB1* | 0.122833883527916 | 0.048296906 |
| *CLDN23* | -0.1228302603 | 0.04830357 |
| *MSTN* | -0.1228218949 | 0.048318961 |
| *IRF9* | -0.1228147854 | 0.048332044 |
| *HGSNAT* | -0.1228089507 | 0.048342783 |
| *LYG2* | 0.122796133293462 | 0.048366381 |
| *SYNM* | -0.1227711801 | 0.04841235 |
| *RAB6B* | -0.1227508127 | 0.048449898 |
| *FAM66A* | -0.1227371529 | 0.048475094 |
| *C14orf126* | 0.122734474130032 | 0.048480037 |
| *BPESC1* | 0.122694757475754 | 0.048553364 |
| *SRCRB4D* | 0.122681640777238 | 0.048577601 |
| *SLC25A44* | 0.122666481026255 | 0.048605626 |
| *ARMCX6* | 0.122662991577583 | 0.048612079 |
| *SNORA51* | 0.122640757057888 | 0.048653212 |
| *LOC282997* | -0.1226364464 | 0.04866119 |
| *PLCE1* | 0.122620306868161 | 0.048691069 |
| *DDX4* | 0.122609732364792 | 0.048710654 |
| *C17orf61* | -0.1225998072 | 0.048729043 |
| *LOC92659* | 0.122589589571058 | 0.048747979 |
| *CGB5* | 0.122589442522526 | 0.048748252 |
| *SDCBP* | 0.122586953297566 | 0.048752866 |
| *PRPSAP2* | 0.122577506139955 | 0.048770381 |
| *RPL38* | -0.1225755009 | 0.0487741 |
| *TSHZ3* | 0.122574132547605 | 0.048776637 |
| *LCN12* | -0.1225738717 | 0.048777121 |
| *TRAM1* | 0.122565973160835 | 0.048791771 |
| *CHST12* | -0.1225635390 | 0.048796287 |
| *PROK2* | 0.122557700635886 | 0.048807119 |
| *GRM6* | -0.1225559451 | 0.048810376 |
| *CCDC85A* | -0.1225492668 | 0.048822769 |
| *ZNF583* | 0.122545422309766 | 0.048829905 |
| *CYP19A1* | 0.122541889110879 | 0.048836464 |
| *LOC100129055* | -0.1225076254 | 0.048900106 |
| *CCDC88B* | -0.1225066326 | 0.048901951 |
| *OR1F2P* | 0.122483735560283 | 0.048944521 |
| *CDC123* | 0.122478187570408 | 0.04895484 |
| *C1orf58* | 0.122477861768681 | 0.048955446 |
| *RIMS3* | -0.1224772367 | 0.048956609 |
| *ZNF705D* | 0.122452346623475 | 0.049002928 |
| *ALDH1A2* | 0.122450998676199 | 0.049005438 |
| *CDKN1A* | -0.1224390155 | 0.049027752 |
| *FAM5C* | 0.122434447100668 | 0.049036261 |
| *SELK* | -0.1224252014 | 0.049053486 |
| *NLRP4* | 0.122410475233745 | 0.049080932 |
| *ALOX12* | -0.1224042530 | 0.049092532 |
| *LYSMD3* | 0.122395772121541 | 0.049108347 |
| *HNF4G* | 0.122386095864615 | 0.049126397 |
| *C10orf28* | 0.122384192062657 | 0.049129948 |
| *NLRP12* | -0.1223736774 | 0.049149569 |
| *HRH4* | -0.1223463480 | 0.049200597 |
| *PCK2* | 0.122320992915843 | 0.049247978 |
| *TDRD12* | 0.122310454095335 | 0.049267684 |
| *WIPF3* | -0.1223092865 | 0.049269867 |
| *C7orf72* | 0.122302198378819 | 0.049283124 |
| *TMEM69* | 0.122298694483797 | 0.049289679 |
| *C15orf57* | -0.1222886788 | 0.049308419 |
| *SH3BGRL3* | 0.12226783642128 | 0.049347436 |
| *JARID2* | 0.122265121022853 | 0.049352521 |
| *ZKSCAN4* | 0.122213447965785 | 0.049449372 |
| *OMG* | 0.122206161999796 | 0.049463041 |
| *FNDC5* | 0.122203240186023 | 0.049468523 |
| *ZNF573* | 0.122199009234591 | 0.049476463 |
| *SERPINB3* | 0.122170705552153 | 0.049529604 |
| *OR13C2* | -0.1221654740 | 0.049539431 |
| *GPATCH4* | 0.122156416748129 | 0.049556449 |
| *CCDC55* | -0.1221312680 | 0.049603728 |
| *RPS24* | -0.1221215801 | 0.049621951 |
| *DCUN1D2* | 0.122112700081951 | 0.049638659 |
| *FAM164A* | 0.122112619686014 | 0.049638811 |
| *FBXW8* | 0.122102595283545 | 0.049657678 |
| *FTLP10* | 0.122096342268741 | 0.04966945 |
| *SIGIRR* | -0.1220959194 | 0.049670246 |
| *DNAJC5B* | 0.122086290362314 | 0.049688379 |
| *ACSL6* | -0.1220636858 | 0.049730967 |
| *HOXC8* | -0.1220577260 | 0.049742201 |
| *MIB1* | 0.122054588943626 | 0.049748115 |
| *PIKFYVE* | 0.122043098055426 | 0.049769782 |
| *ING5* | -0.1220051192 | 0.049841452 |
| *CD36* | -0.1220024829 | 0.04984643 |
| *NCRNA00087* | -0.1219673965 | 0.049912723 |
| *ASGR2* | -0.1219669808 | 0.049913509 |
| *SMCR8* | 0.121957854444108 | 0.049930765 |
| *ZBED1* | -0.1219539412 | 0.049938165 |
| *C9orf64* | 0.121953017234729 | 0.049939913 |
| *IL19* | 0.121952095897387 | 0.049941656 |
| *WDR45* | -0.1219491517 | 0.049947224 |
| *LPHN1* | -0.1219404228 | 0.049963738 |

Supplementary Table 7. Pearson’s test was used to analyze the correlations between *RECQL4* and the genes that were differentially expressed in OS (LinkedOmics).

| Gene | Statistic | *P*-value |
| --- | --- | --- |
| *RECQL4* | 1 | 1E-63 |
| *NFKBIL2* | 0.816160769772345 | 3.67767E-63 |
| *TRAIP* | 0.750469977934766 | 3.94078E-48 |
| *C16orf59* | 0.730062048717422 | 2.18815E-44 |
| *RAD54L* | 0.72933506475714 | 2.93186E-44 |
| *CDT1* | 0.724941170833919 | 1.68435E-43 |
| *CDC20* | 0.71431128267104 | 1.00892E-41 |
| *PKMYT1* | 0.709238940728232 | 6.66318E-41 |
| *CDCA5* | 0.706670215267267 | 1.70671E-40 |
| *CDC45* | 0.704447249102348 | 3.82035E-40 |
| *E2F1* | 0.703039360889064 | 6.33945E-40 |
| *POC1A* | 0.69885418910891 | 2.80742E-39 |
| *KIF2C* | 0.690678438607287 | 4.77536E-38 |
| *MCM7* | 0.690287176432954 | 5.45604E-38 |
| *RNASEH2A* | 0.689269116089906 | 7.70953E-38 |
| *CENPM* | 0.686834302254325 | 1.75239E-37 |
| *GINS2* | 0.684922139420796 | 3.32078E-37 |
| *FANCA* | 0.684297951588493 | 4.08695E-37 |
| *EME1* | 0.681103629723421 | 1.17296E-36 |
| *OIP5* | 0.677723119387835 | 3.52817E-36 |
| *SPC25* | 0.673921646931769 | 1.19615E-35 |
| *CDC25C* | 0.672618622527316 | 1.81016E-35 |
| *CDCA3* | 0.671689317110741 | 2.4293E-35 |
| *TPX2* | 0.67020142497386 | 3.8822E-35 |
| *UBE2C* | 0.669361039969462 | 5.05302E-35 |
| *SPAG5* | 0.667374010851468 | 9.39142E-35 |
| *RFC4* | 0.664926976576445 | 2.00166E-34 |
| *PLK1* | 0.66489287992835 | 2.02277E-34 |
| *NCAPG* | 0.661961788775395 | 4.96023E-34 |
| *BIRC5* | 0.658714161168284 | 1.32445E-33 |
| *MND1* | 0.656243162194706 | 2.77358E-33 |
| *SKA1* | 0.656102853542267 | 2.89187E-33 |
| *FEN1* | 0.653336366988517 | 6.55876E-33 |
| *CCNB2* | 0.653156783830644 | 6.9148E-33 |
| *RRM2* | 0.653052776972623 | 7.12965E-33 |
| *TROAP* | 0.651311811268122 | 1.18778E-32 |
| *FANCD2* | 0.650394991639279 | 1.55199E-32 |
| *PSMC3IP* | 0.64973486679174 | 1.88049E-32 |
| *KIAA0101* | 0.648991652455524 | 2.33292E-32 |
| *KIF22* | 0.648135305278418 | 2.98854E-32 |
| *UBE2T* | 0.646579336641406 | 4.67747E-32 |
| *EXO1* | 0.645814736092615 | 5.82371E-32 |
| *HJURP* | 0.642685807018599 | 1.41878E-31 |
| *POLA2* | 0.641847886270578 | 1.79768E-31 |
| *PTTG1* | 0.639213525776106 | 3.76559E-31 |
| *CDC25A* | 0.638540919706763 | 4.54277E-31 |
| *CCNB1* | 0.637042142741646 | 6.8893E-31 |
| *CKS2* | 0.636247333700628 | 8.58378E-31 |
| *WDR62* | 0.635133326229154 | 1.16699E-30 |
| *POLD1* | 0.632539405800292 | 2.37438E-30 |
| *GINS1* | 0.632312643528208 | 2.52569E-30 |
| *SKA3* | 0.632146364217159 | 2.64264E-30 |
| *XRCC3* | 0.629944864406668 | 4.79946E-30 |
| *AURKA* | 0.629902303761456 | 4.85492E-30 |
| *FOXM1* | 0.62811569200751 | 7.85127E-30 |
| *TACC3* | 0.627045116772199 | 1.04564E-29 |
| *CHTF18* | 0.625526332154832 | 1.56711E-29 |
| *CKS1B* | 0.625032338167092 | 1.78667E-29 |
| *KIFC1* | 0.624739342606255 | 1.93095E-29 |
| *RFC2* | 0.62453893891875 | 2.03619E-29 |
| *MXD3* | 0.624232221527787 | 2.20831E-29 |
| *NUF2* | 0.623741994111434 | 2.51367E-29 |
| *ASF1B* | 0.623202676385883 | 2.89782E-29 |
| *MCM2* | 0.622634917640353 | 3.36483E-29 |
| *NASP* | 0.620062869866139 | 6.5959E-29 |
| *C15orf23* | 0.619969184372363 | 6.75881E-29 |
| *MAD2L1* | 0.61920392490017 | 8.24691E-29 |
| *MELK* | 0.619057998756738 | 8.56533E-29 |
| *KIF4A* | 0.618079502941124 | 1.10368E-28 |
| *RAD51* | 0.618062694546532 | 1.10849E-28 |
| *SGOL1* | 0.614950980616832 | 2.46763E-28 |
| *DLGAP5* | 0.613820136800487 | 3.29329E-28 |
| *ORC6L* | 0.611850559252187 | 5.42934E-28 |
| *CDC6* | 0.611581794426947 | 5.81108E-28 |
| *NEK2* | 0.611085356541194 | 6.58704E-28 |
| *KIF18B* | 0.609841953465939 | 9.00753E-28 |
| *EZH2* | 0.609461508130353 | 9.90997E-28 |
| *AURKB* | 0.608854909120437 | 1.15365E-27 |
| *GTSE1* | 0.607917279318213 | 1.45818E-27 |
| *PTTG3P* | 0.607251226808566 | 1.72139E-27 |
| *DTL* | 0.606411561842601 | 2.12074E-27 |
| *CDCA8* | 0.606247927843851 | 2.20859E-27 |
| *LIG1* | 0.605675175007346 | 2.54525E-27 |
| *FBXO43* | 0.605539340071548 | 2.63224E-27 |
| *FANCI* | 0.605390163800181 | 2.73116E-27 |
| *DDX12* | 0.603261535584427 | 4.61347E-27 |
| *DEPDC1* | 0.603131617303999 | 4.76287E-27 |
| *ZWINT* | 0.598344813178853 | 1.52566E-26 |
| *CHAF1B* | 0.596774304356388 | 2.22586E-26 |
| *CENPN* | 0.595452340406888 | 3.05409E-26 |
| *CHAF1A* | 0.595442921524501 | 3.06096E-26 |
| *C17orf53* | 0.59513055342382 | 3.29782E-26 |
| *TTK* | 0.593004775423654 | 5.46481E-26 |
| *E2F2* | 0.590218194379986 | 1.05357E-25 |
| *IQGAP3* | 0.589370683996683 | 1.28476E-25 |
| *BUB1* | 0.588530513547219 | 1.56311E-25 |
| *MCM5* | 0.587489830698554 | 1.9913E-25 |
| *GINS4* | 0.586962556896093 | 2.25043E-25 |
| *CDKN3* | 0.584521170257759 | 3.95376E-25 |
| *PCNA* | 0.584473651297742 | 3.99717E-25 |
| *CENPH* | 0.583555910330365 | 4.9341E-25 |
| *UBE2S* | 0.583346334958524 | 5.17669E-25 |
| *C9orf100* | 0.583103184246338 | 5.47289E-25 |
| *NUSAP1* | 0.582600897734884 | 6.13861E-25 |
| *DSN1* | 0.579884218945013 | 1.13821E-24 |
| *POLQ* | 0.578872653774705 | 1.43032E-24 |
| *HELLS* | 0.578064712592465 | 1.71563E-24 |
| *CENPA* | 0.577662746544633 | 1.87777E-24 |
| *GGH* | 0.577441771 | 1.97324E-24 |
| *TYMS* | 0.575658623301489 | 2.94019E-24 |
| *PLK4* | 0.571833940617626 | 6.86E-24 |
| *NCAPH* | 0.570767331593087 | 8.67127E-24 |
| *MKI67* | 0.569539123821105 | 1.13449E-23 |
| *POLE2* | 0.568842544381398 | 1.32063E-23 |
| *ESPL1* | 0.568519265169561 | 1.41694E-23 |
| *ORC1L* | 0.567120856284233 | 1.91952E-23 |
| *NRM* | 0.566006177601167 | 2.44252E-23 |
| *CCNF* | 0.565908519903243 | 2.49453E-23 |
| *CPSF1* | 0.565895011098753 | 2.50181E-23 |
| *CENPF* | 0.565234741003433 | 2.88423E-23 |
| *C2orf48* | 0.564728444308941 | 3.21593E-23 |
| *PBK* | 0.563518441227904 | 4.16836E-23 |
| *CCNA2* | 0.562964034371887 | 4.69278E-23 |
| *STMN1* | 0.56240015504674 | 5.29267E-23 |
| *CDK1* | 0.561810609133227 | 6.00056E-23 |
| *DDX11* | 0.561094020044967 | 6.98732E-23 |
| *RAD54B* | 0.560547346919279 | 7.84592E-23 |
| *ERCC6L* | 0.560352223088472 | 8.17687E-23 |
| *PSRC1* | 0.560064745227663 | 8.68963E-23 |
| *MLF1IP* | 0.560028736064101 | 8.75604E-23 |
| *TCF19* | 0.559728215716535 | 9.33017E-23 |
| *KIF11* | 0.559237753277779 | 1.03477E-22 |
| *PAQR4* | 0.55847670819268 | 1.21465E-22 |
| *KIF15* | 0.558416407524935 | 1.23016E-22 |
| *DEPDC1B* | 0.557466999887318 | 1.50151E-22 |
| *FAM72B* | 0.557026059733232 | 1.6468E-22 |
| *UHRF1* | 0.556828801451054 | 1.71619E-22 |
| *NDC80* | 0.55667935494837 | 1.77067E-22 |
| *STIL* | 0.55470398113437 | 2.67238E-22 |
| *BUB1B* | 0.554096434854801 | 3.03137E-22 |
| *C16orf75* | 0.553688869465522 | 3.29837E-22 |
| *MYBL2* | 0.5527104861647 | 4.03737E-22 |
| *DIAPH3* | 0.549931828498299 | 7.1431E-22 |
| *SRRT* | 0.54972779985465 | 7.44715E-22 |
| *TOP2A* | 0.549117425437309 | 8.43481E-22 |
| *PRC1* | 0.546016412573879 | 1.58181E-21 |
| *NEIL3* | 0.545934303164933 | 1.60822E-21 |
| *FAM64A* | 0.544847218039505 | 2.00162E-21 |
| *CEP55* | 0.544789788669511 | 2.02485E-21 |
| *LRRC14* | 0.544249744153078 | 2.25667E-21 |
| *CDCA4* | 0.543235326191933 | 2.76481E-21 |
| *NCOA4* | -0.542948719 | 2.92772E-21 |
| *CDCA2* | 0.540242111362673 | 5.01385E-21 |
| *HAUS8* | 0.539708727062397 | 5.57143E-21 |
| *RACGAP1* | 0.539085204968649 | 6.30083E-21 |
| *SCRIB* | 0.538953195119942 | 6.46689E-21 |
| *H2AFZ* | 0.538011267129036 | 7.78335E-21 |
| *LOC642846* | 0.537657328954753 | 8.34333E-21 |
| *SUV39H1* | 0.53734504212221 | 8.87017E-21 |
| *SPC24* | 0.536889527884255 | 9.69776E-21 |
| *ADCK5* | 0.536230182915909 | 1.10317E-20 |
| *TRIP13* | 0.535632327564028 | 1.23961E-20 |
| *C15orf42* | 0.535059713261995 | 1.3858E-20 |
| *FBXL6* | 0.534550832431945 | 1.52984E-20 |
| *HSPB11* | 0.533268988420106 | 1.96113E-20 |
| *GMNN* | 0.532348748292844 | 2.34238E-20 |
| *ARHGAP11A* | 0.531995279344717 | 2.50743E-20 |
| *WDR76* | 0.530486835231784 | 3.34994E-20 |
| *KIF23* | 0.529701098577637 | 3.89333E-20 |
| *MCM10* | 0.529354151312029 | 4.16001E-20 |
| *E2F7* | 0.528792781338021 | 4.62998E-20 |
| *FANCG* | 0.5287437625046 | 4.67341E-20 |
| *C8ORFK29* | 0.528575078432428 | 4.82595E-20 |
| *CCHCR1* | 0.528328368507191 | 5.0579E-20 |
| *CCNE2* | 0.527642923025319 | 5.76137E-20 |
| *C21orf58* | 0.525446275042225 | 8.72785E-20 |
| *ENY2* | 0.524706799141916 | 1.00308E-19 |
| *C14orf80* | 0.524573736463701 | 1.02848E-19 |
| *HMGB2* | 0.523120304828815 | 1.35048E-19 |
| *CCNE1* | 0.521774000692562 | 1.73602E-19 |
| *KIF14* | 0.519906476833704 | 2.45499E-19 |
| *PPP1R16A* | 0.519168662640553 | 2.81353E-19 |
| *GTPBP3* | 0.518683911189868 | 3.07658E-19 |
| *CENPE* | 0.518533829734866 | 3.16282E-19 |
| *LSM4* | 0.517653186666725 | 3.71879E-19 |
| *CHEK1* | 0.517532048590922 | 3.80241E-19 |
| *SAC3D1* | 0.51671571877436 | 4.41613E-19 |
| *KIF18A* | 0.516180326493561 | 4.87042E-19 |
| *HMGN2* | 0.515875710966834 | 5.14906E-19 |
| *H2AFX* | 0.515279711406078 | 5.74025E-19 |
| *FAM72D* | 0.51506174785576 | 5.9727E-19 |
| *HMMR* | 0.514099318289386 | 7.11451E-19 |
| *AZI1* | 0.512247522817602 | 9.94608E-19 |
| *ASPM* | 0.511816839968762 | 1.0749E-18 |
| *LMNB1* | 0.51013777711119 | 1.45329E-18 |
| *LMBRD1* | -0.508967877 | 1.79139E-18 |
| *IQCC* | 0.508885868689234 | 1.8178E-18 |
| *KIF24* | 0.507954647742088 | 2.14577E-18 |
| *KIF20A* | 0.506062226851854 | 3.00125E-18 |
| *SMC4* | 0.505567456065251 | 3.2753E-18 |
| *BLM* | 0.505253683620841 | 3.46167E-18 |
| *WDR34* | 0.504771282369273 | 3.76868E-18 |
| *RRM1* | 0.504354379655567 | 4.05541E-18 |
| *HN1L* | 0.503704565381852 | 4.54553E-18 |
| *DONSON* | 0.502437086799868 | 5.67452E-18 |
| *FANCB* | 0.502175934149594 | 5.93924E-18 |
| *CKAP2L* | 0.501153437870281 | 7.09736E-18 |
| *ATAD2* | 0.4995572864005 | 9.36162E-18 |
| *VRK1* | 0.499481550285664 | 9.48508E-18 |
| *PGP* | 0.49931960045745 | 9.75449E-18 |
| *C1orf135* | 0.49873136001184 | 1.07977E-17 |
| *SHCBP1* | 0.498658841046731 | 1.09336E-17 |
| *MYO19* | 0.4978220842074 | 1.2629E-17 |
| *PRIM1* | 0.497418629084711 | 1.35362E-17 |
| *ITGB3BP* | 0.496330106971202 | 1.63146E-17 |
| *DEM1* | 0.496266832207926 | 1.64922E-17 |
| *TUBB* | 0.49475746499355 | 2.13406E-17 |
| *MAD2L2* | 0.494157962902906 | 2.36325E-17 |
| *CNIH2* | 0.493999130777478 | 2.42791E-17 |
| *C11orf82* | 0.493918449618993 | 2.46142E-17 |
| *TMEM201* | 0.493351856123843 | 2.70984E-17 |
| *RFC3* | 0.493296556424662 | 2.73537E-17 |
| *MAZ* | 0.49311206730441 | 2.82224E-17 |
| *PARP2* | 0.493110579133711 | 2.82295E-17 |
| *KIFC2* | 0.49277725450479 | 2.98685E-17 |
| *CENPJ* | 0.492471387317556 | 3.14544E-17 |
| *CCDC18* | 0.490804304201663 | 4.16628E-17 |
| *PUF60* | 0.49018521925091 | 4.62284E-17 |
| *CTSO* | -0.490082882 | 4.7029E-17 |
| *LOC100128191* | 0.489471213921969 | 5.21052E-17 |
| *C19orf48* | 0.486549810398536 | 8.47754E-17 |
| *KIF4B* | 0.486159826313513 | 9.0435E-17 |
| *PTTG2* | 0.485486775119694 | 1.01086E-16 |
| *TK1* | 0.485139252153529 | 1.07057E-16 |
| *DPF1* | 0.484530718806903 | 1.18357E-16 |
| *TIPIN* | 0.484493687311448 | 1.19081E-16 |
| *DSCC1* | 0.484472459598412 | 1.19498E-16 |
| *CENPK* | 0.4839125436656 | 1.31031E-16 |
| *KNTC1* | 0.483745998749895 | 1.34667E-16 |
| *RANBP1* | 0.483729344989952 | 1.35036E-16 |
| *TIMELESS* | 0.483497945437209 | 1.40267E-16 |
| *STRA13* | 0.482174226881106 | 1.74233E-16 |
| *GSG2* | 0.482027150480661 | 1.78472E-16 |
| *DDX39* | 0.482022838650474 | 1.78598E-16 |
| *TUBB2C* | 0.481567495184821 | 1.92381E-16 |
| *WHSC1* | 0.479711747179294 | 2.60164E-16 |
| *CEP78* | 0.479280667782175 | 2.78987E-16 |
| *HIST1H1B* | 0.47860647074378 | 3.11131E-16 |
| *CDH24* | 0.477127868122881 | 3.94864E-16 |
| *CABLES2* | 0.476029823759819 | 4.70965E-16 |
| *POLE* | 0.475252818015003 | 5.33317E-16 |
| *C16orf79* | 0.475049467303549 | 5.50928E-16 |
| *CYBRD1* | -0.474282596 | 6.22613E-16 |
| *PXMP2* | 0.471753984302547 | 9.29915E-16 |
| *SF3A3* | 0.471430229218054 | 9.78693E-16 |
| *MCM3* | 0.471319429255079 | 9.95956E-16 |
| *SNRPA* | 0.470871589091186 | 1.06882E-15 |
| *RAD51AP1* | 0.470241272079528 | 1.18028E-15 |
| *NCAPG2* | 0.470034136336137 | 1.21934E-15 |
| *CIT* | 0.469484400437896 | 1.32923E-15 |
| *E2F8* | 0.469002576699272 | 1.43348E-15 |
| *KIAA1524* | 0.468797467005828 | 1.48025E-15 |
| *HSF1* | 0.467910524274414 | 1.7003E-15 |
| *ARHGAP33* | 0.466380817526988 | 2.15736E-15 |
| *CDC25B* | 0.465976200350341 | 2.29713E-15 |
| *FEZ2* | -0.465367462 | 2.52426E-15 |
| *C21orf45* | 0.46500567233174 | 2.66952E-15 |
| *SNRPB* | 0.464866920276741 | 2.72737E-15 |
| *CYC1* | 0.464169605716473 | 3.03721E-15 |
| *DTYMK* | 0.464114393974934 | 3.06317E-15 |
| *LRDD* | 0.464108860707874 | 3.06578E-15 |
| *CAMK2N2* | 0.462141930744742 | 4.14723E-15 |
| *MCM6* | 0.461942494567374 | 4.27578E-15 |
| *SLC25A10* | 0.461456668906096 | 4.60548E-15 |
| *MSH5* | 0.460882722335691 | 5.02713E-15 |
| *EXOSC8* | 0.46045040125515 | 5.36946E-15 |
| *ACYP1* | 0.460208185850319 | 5.57112E-15 |
| *ACAT2* | 0.459715428058289 | 6.0045E-15 |
| *PHF19* | 0.459633528896152 | 6.07966E-15 |
| *SGOL2* | 0.45956200207073 | 6.14605E-15 |
| *PAFAH1B3* | 0.459485678090914 | 6.21768E-15 |
| *STX7* | -0.459412214 | 6.2874E-15 |
| *PRPF3* | 0.459083377937063 | 6.60894E-15 |
| *XRCC2* | 0.457611110830178 | 8.25711E-15 |
| *NCAPH2* | 0.456430862414373 | 9.86302E-15 |
| *GIT2* | -0.456112022 | 1.03469E-14 |
| *ANLN* | 0.455887798225267 | 1.0701E-14 |
| *TMEM97* | 0.455790825952953 | 1.08578E-14 |
| *ACOT7* | 0.455259929964269 | 1.17568E-14 |
| *RBM10* | 0.455012521929094 | 1.22002E-14 |
| *FAM111B* | 0.454772015894256 | 1.2647E-14 |
| *C20orf194* | -0.45398055 | 1.42331E-14 |
| *BRCA1* | 0.45337831331951 | 1.55688E-14 |
| *NCAPD2* | 0.453376858903153 | 1.55721E-14 |
| *GNL2* | 0.453116779306401 | 1.61863E-14 |
| *YPEL5* | -0.451899997 | 1.93889E-14 |
| *CLSPN* | 0.451495502167166 | 2.05849E-14 |
| *TMBIM4* | -0.451150972 | 2.16602E-14 |
| *SNHG12* | 0.450982763257357 | 2.2205E-14 |
| *HIST1H2AL* | 0.450712382434897 | 2.31089E-14 |
| *SIVA1* | 0.450525692806557 | 2.37539E-14 |
| *HFE* | -0.450317708 | 2.44932E-14 |
| *LOC339674* | 0.449685008005663 | 2.68832E-14 |
| *ELF1* | -0.448895965 | 3.01851E-14 |
| *EXOSC2* | 0.448773095548465 | 3.07337E-14 |
| *PPIL5* | 0.448727979253794 | 3.09376E-14 |
| *CENPI* | 0.448025084955064 | 3.42903E-14 |
| *C5orf34* | 0.446727387732103 | 4.1438E-14 |
| *DNAJC9* | 0.446604362110384 | 4.21867E-14 |
| *ITPKA* | 0.446145046329919 | 4.51008E-14 |
| *C13orf27* | 0.446000263233726 | 4.60595E-14 |
| *DBF4* | 0.445713414179251 | 4.80181E-14 |
| *ZMYND10* | 0.44532733918322 | 5.07832E-14 |
| *WDHD1* | 0.444537093009108 | 5.69369E-14 |
| *RBM14* | 0.44444125503587 | 5.77311E-14 |
| *SMC2* | 0.444268099058674 | 5.91934E-14 |
| *MCM4* | 0.443941137344187 | 6.2054E-14 |
| *CDC7* | 0.443877744588714 | 6.26241E-14 |
| *C5orf53* | -0.443826309 | 6.30904E-14 |
| *LHX2* | 0.44337634456864 | 6.7317E-14 |
| *SNRPD1* | 0.442908723477892 | 7.20024E-14 |
| *C11orf80* | 0.442665303290817 | 7.4566E-14 |
| *DNAJB9* | -0.442068328 | 8.12366E-14 |
| *PLCXD1* | 0.441391596360981 | 8.95048E-14 |
| *FAM83D* | 0.440838780417047 | 9.68643E-14 |
| *REEP4* | 0.440655403207231 | 9.94337E-14 |
| *ESCO2* | 0.439950584059472 | 1.09944E-13 |
| *C16orf93* | 0.439353956058633 | 1.19682E-13 |
| *CCDC99* | 0.438903943371173 | 1.27581E-13 |
| *RALY* | 0.43881577084756 | 1.29187E-13 |
| *SYCE2* | 0.438323300751902 | 1.38527E-13 |
| *TUBG1* | 0.438263537515444 | 1.39705E-13 |
| *TGFBR2* | -0.438082267 | 1.43336E-13 |
| *AURKAPS1* | 0.437974985867565 | 1.45528E-13 |
| *RTBDN* | 0.437698946150778 | 1.51321E-13 |
| *PIK3IP1* | -0.437110087 | 1.64442E-13 |
| *HNRNPL* | 0.435496961071176 | 2.0634E-13 |
| *C1QL1* | 0.435317872537036 | 2.1159E-13 |
| *CENPW* | 0.435269179539546 | 2.13039E-13 |
| *CSE1L* | 0.435102843795296 | 2.18065E-13 |
| *PCYOX1* | -0.435034973 | 2.20149E-13 |
| *MRPL52* | 0.434973277965394 | 2.2206E-13 |
| *EPR1* | 0.434916935955887 | 2.2382E-13 |
| *PPP2R3B* | 0.434897431663073 | 2.24432E-13 |
| *PPIH* | 0.434184464952148 | 2.4797E-13 |
| *WDR90* | 0.434179304830103 | 2.48149E-13 |
| *CYYR1* | -0.434132366 | 2.49781E-13 |
| *HIRIP3* | 0.433889226659725 | 2.58408E-13 |
| *RTKN2* | 0.433674349141158 | 2.66273E-13 |
| *ITM2B* | -0.43271125 | 3.04495E-13 |
| *SETD7* | -0.431948655 | 3.38512E-13 |
| *PSMG1* | 0.431893506054265 | 3.41111E-13 |
| *THOP1* | 0.431785533459282 | 3.46256E-13 |
| *TMEM106C* | 0.431461159938987 | 3.62172E-13 |
| *THOC4* | 0.431247619390363 | 3.73038E-13 |
| *NSMCE2* | 0.431192826231986 | 3.75877E-13 |
| *SASS6* | 0.430901952631243 | 3.91305E-13 |
| *METT11D1* | 0.430201409024741 | 4.31043E-13 |
| *ELTD1* | -0.429767894 | 4.57579E-13 |
| *SFRS3* | 0.429758835204724 | 4.5815E-13 |
| *C19orf57* | 0.429653535631307 | 4.6484E-13 |
| *DOT1L* | 0.428727562476711 | 5.27932E-13 |
| *NBR1* | -0.428600474 | 5.37218E-13 |
| *EIF2C2* | 0.427661574293643 | 6.10943E-13 |
| *TUBA1B* | 0.427306000386244 | 6.41368E-13 |
| *HDGF* | 0.427254999192225 | 6.45851E-13 |
| *U2AF1* | 0.427173923188722 | 6.53042E-13 |
| *GALNT11* | -0.427022481 | 6.66682E-13 |
| *CEP72* | 0.426772692231848 | 6.8979E-13 |
| *FAM198B* | -0.426175118 | 7.4829E-13 |
| *C4orf21* | 0.425709900573809 | 7.97159E-13 |
| *C6orf147* | 0.425706189210755 | 7.97561E-13 |
| *C16orf55* | 0.425360060462799 | 8.35945E-13 |
| *NR2C2AP* | 0.425106768578982 | 8.6517E-13 |
| *ATAD3A* | 0.424558480974388 | 9.31888E-13 |
| *RPP21* | 0.424459384522314 | 9.44471E-13 |
| *TIGD5* | 0.424334658577436 | 9.60544E-13 |
| *ZNF598* | 0.424079872884622 | 9.9421E-13 |
| *IFNGR1* | -0.424079321 | 9.94284E-13 |
| *ERI3* | 0.423944033713984 | 1.01263E-12 |
| *LAS1L* | 0.423904561960596 | 1.01804E-12 |
| *NUP85* | 0.423167501472235 | 1.12448E-12 |
| *RNF125* | -0.42278559 | 1.18382E-12 |
| *CTPS* | 0.42237925662955 | 1.25031E-12 |
| *FAM158A* | 0.421629087403739 | 1.38277E-12 |
| *CCPG1* | -0.420592125 | 1.58862E-12 |
| *RCCD1* | 0.420029764115881 | 1.71246E-12 |
| *TMSB15A* | 0.419836252260511 | 1.75721E-12 |
| *RNPS1* | 0.418971474244623 | 1.97154E-12 |
| *SLC26A6* | 0.418802278568159 | 2.01636E-12 |
| *LRRC45* | 0.418563778440744 | 2.08123E-12 |
| *WDR67* | 0.41850830124106 | 2.09661E-12 |
| *RFC5* | 0.417942577774989 | 2.25989E-12 |
| *LOC401052* | 0.417763737520319 | 2.31404E-12 |
| *GPAA1* | 0.417539122089254 | 2.38384E-12 |
| *SERINC1* | -0.417281071 | 2.46657E-12 |
| *C6orf125* | 0.417204755942269 | 2.49157E-12 |
| *RNF13* | -0.416702256 | 2.66245E-12 |
| *SHARPIN* | 0.416122437605425 | 2.87384E-12 |
| *TCTEX1D2* | 0.415725510635644 | 3.02789E-12 |
| *ATRIP* | 0.415300363833019 | 3.20183E-12 |
| *KREMEN2* | 0.415272735786836 | 3.21347E-12 |
| *IFRD2* | 0.415236521993195 | 3.22878E-12 |
| *FOXH1* | 0.415092278086305 | 3.29048E-12 |
| *ATAD3B* | 0.414694049972809 | 3.46684E-12 |
| *RPUSD3* | 0.414469087254051 | 3.57051E-12 |
| *PRR19* | 0.414392263906843 | 3.6066E-12 |
| *WDR4* | 0.414331230313297 | 3.63552E-12 |
| *RBM15* | 0.413548736550163 | 4.027E-12 |
| *PABPC1L* | 0.413455384222027 | 4.07636E-12 |
| *ODF2* | 0.41282735682984 | 4.42411E-12 |
| *MMRN2* | -0.412782025 | 4.4503E-12 |
| *TIMM17B* | 0.412745352787207 | 4.47159E-12 |
| *TMEM66* | -0.412275433 | 4.75345E-12 |
| *KDM1A* | 0.411991391319082 | 4.93214E-12 |
| *TELO2* | 0.4119066672221 | 4.98669E-12 |
| *CHRAC1* | 0.411555224572154 | 5.21933E-12 |
| *MYCT1* | -0.410897583 | 5.6834E-12 |
| *ILF2* | 0.410844916108685 | 5.72226E-12 |
| *RIBC2* | 0.410488494709498 | 5.99211E-12 |
| *ACAP3* | 0.410375602637553 | 6.08014E-12 |
| *RAD9A* | 0.409496506117493 | 6.81009E-12 |
| *POLR2D* | 0.4094664823645 | 6.83647E-12 |
| *PSMB2* | 0.408987406839612 | 7.27114E-12 |
| *ASAH1* | -0.408811873 | 7.43704E-12 |
| *RAD18* | 0.408247720856585 | 7.99562E-12 |
| *TARDBP* | 0.407956640585486 | 8.29959E-12 |
| *FAM72A* | 0.407904874035127 | 8.35482E-12 |
| *HIST2H3C* | 0.407754863090532 | 8.51688E-12 |
| *RPA3* | 0.407724370009959 | 8.5502E-12 |
| *RASSF7* | 0.407583872455865 | 8.70535E-12 |
| *PRPF4* | 0.407501698360014 | 8.79736E-12 |
| *LMNB2* | 0.407409344243765 | 8.9019E-12 |
| *FAM160B1* | -0.407228151 | 9.11053E-12 |
| *CCDC123* | 0.407191586774663 | 9.1532E-12 |
| *CKAP2* | 0.407144602452246 | 9.20833E-12 |
| *MYBL1* | 0.406806935925464 | 9.6141E-12 |
| *S1PR1* | -0.406736505 | 9.7009E-12 |
| *RHOT2* | 0.406599567066831 | 9.87187E-12 |
| *ANP32E* | 0.406329187001324 | 1.02181E-11 |
| *TSEN54* | 0.405996302413748 | 1.06606E-11 |
| *FMO2* | -0.405884006 | 1.08141E-11 |
| *HIST1H3B* | 0.405416906759248 | 1.14758E-11 |
| *POLA1* | 0.40525134456635 | 1.17196E-11 |
| *S100A2* | 0.404769679320076 | 1.24582E-11 |
| *PIF1* | 0.404659017994747 | 1.26342E-11 |
| *ASPA* | -0.403940937 | 1.38363E-11 |
| *LATS2* | -0.403786927 | 1.41083E-11 |
| *C10orf32* | -0.403735535 | 1.42002E-11 |
| *C6orf26* | 0.403448891284834 | 1.47236E-11 |
| *ATAD5* | 0.403393699979394 | 1.48265E-11 |
| *CDK16* | 0.403217779673528 | 1.51592E-11 |
| *TCEB1* | 0.40307628349526 | 1.54321E-11 |
| *CDKN2C* | 0.402755799034538 | 1.6068E-11 |
| *MGC70857* | 0.40249687946075 | 1.66003E-11 |
| *PDCD5* | 0.402428489324486 | 1.67437E-11 |
| *C3orf75* | 0.402160868492555 | 1.73167E-11 |
| *ACVR1B* | -0.402031313 | 1.76009E-11 |
| *TXNIP* | -0.401675393 | 1.84052E-11 |
| *SNRPD3* | 0.401324831744737 | 1.92323E-11 |
| *CD302* | -0.401047017 | 1.99134E-11 |
| *SGMS1* | -0.40068998 | 2.08233E-11 |
| *C1QL4* | 0.400139050199925 | 2.23071E-11 |
| *RANGAP1* | 0.399959524765036 | 2.28125E-11 |
| *NPRL2* | 0.399785841575175 | 2.3312E-11 |
| *CNOT10* | 0.399667068862083 | 2.36598E-11 |
| *GMPS* | 0.39963440136817 | 2.37563E-11 |
| *KIAA1033* | -0.399478257 | 2.4223E-11 |
| *RUVBL2* | 0.399353764726798 | 2.46014E-11 |
| *CHRNA5* | 0.399098320302454 | 2.5396E-11 |
| *DHRS13* | 0.398901950650528 | 2.60238E-11 |
| *PFDN6* | 0.398891552188132 | 2.60575E-11 |
| *SNRPA1* | 0.398744175366269 | 2.65391E-11 |
| *CENPP* | 0.398725863954431 | 2.65996E-11 |
| *IL1F7* | 0.398680428878513 | 2.67502E-11 |
| *SMG5* | 0.398002684409704 | 2.9097E-11 |
| *RDBP* | 0.397792597010851 | 2.98643E-11 |
| *HEATR7A* | 0.397219208106417 | 3.20601E-11 |
| *CACYBP* | 0.397027320574305 | 3.28294E-11 |
| *GPR172A* | 0.396760438184493 | 3.39293E-11 |
| *C9orf40* | 0.396584548951903 | 3.46737E-11 |
| *KPNA2* | 0.396228921885043 | 3.62277E-11 |
| *YPEL2* | -0.396145822 | 3.66005E-11 |
| *BMPR2* | -0.396082475 | 3.68871E-11 |
| *ECT2* | 0.396070916742842 | 3.69397E-11 |
| *NFE2L2* | -0.395753371 | 3.84119E-11 |
| *ZBTB4* | -0.395650408 | 3.89015E-11 |
| *SPRYD3* | -0.395222028 | 4.10041E-11 |
| *NDFIP1* | -0.395025697 | 4.20042E-11 |
| *RACGAP1P* | 0.39495719693681 | 4.23588E-11 |
| *RPUSD1* | 0.394883431176237 | 4.27438E-11 |
| *ZFYVE19* | 0.394825619213387 | 4.30479E-11 |
| *C1orf35* | 0.394421872183455 | 4.52314E-11 |
| *DAZAP1* | 0.394019720626044 | 4.75131E-11 |
| *NOSTRIN* | -0.393604003 | 4.99894E-11 |
| *CRIM1* | -0.393509054 | 5.05724E-11 |
| *COPS3* | 0.393270717787539 | 5.20649E-11 |
| *WDFY3* | -0.393243742 | 5.22365E-11 |
| *RASGRF2* | -0.393180493 | 5.26411E-11 |
| *HIST1H2BO* | 0.392988829879907 | 5.38856E-11 |
| *ISCU* | -0.39293218 | 5.42589E-11 |
| *PTPRB* | -0.392922609 | 5.43222E-11 |
| *TUBA1C* | 0.392920599587349 | 5.43355E-11 |
| *GABARAPL1* | -0.392428701 | 5.76889E-11 |
| *BCL2L12* | 0.391894816651774 | 6.15562E-11 |
| *NCOA1* | -0.391689914 | 6.31064E-11 |
| *HIST1H2AH* | 0.391563375522062 | 6.40827E-11 |
| *SNX29* | -0.391560017 | 6.41088E-11 |
| *NCAPD3* | 0.391251407791679 | 6.65526E-11 |
| *NUDC* | 0.391201671963679 | 6.69549E-11 |
| *MAST1* | 0.390974315163897 | 6.88239E-11 |
| *EXOSC3* | 0.390808435654861 | 7.02195E-11 |
| *PDXP* | 0.390782920644163 | 7.04366E-11 |
| *RHEBL1* | 0.390354316941053 | 7.41823E-11 |
| *LOC81691* | 0.390162548312057 | 7.59202E-11 |
| *C10orf128* | -0.389899889 | 7.8365E-11 |
| *E4F1* | 0.389135933316488 | 8.59189E-11 |
| *CDK2* | 0.389109388752838 | 8.61937E-11 |
| *GIMAP8* | -0.388856726 | 8.88525E-11 |
| *RAC3* | 0.388684206502652 | 9.07136E-11 |
| *TIMM16* | 0.388480577827961 | 9.29591E-11 |
| *FAM82A1* | -0.388355799 | 9.43617E-11 |
| *SIP1* | 0.388071918258017 | 9.76297E-11 |
| *IFI27L1* | 0.387792494045743 | 1.00954E-10 |
| *OR2B6* | 0.38756376903915 | 1.03756E-10 |
| *MTHFD1* | 0.387536652215676 | 1.04093E-10 |
| *HNRNPA2B1* | 0.387206555685903 | 1.08285E-10 |
| *DNA2* | 0.38707317182571 | 1.10025E-10 |
| *BOP1* | 0.386987726243278 | 1.11153E-10 |
| *FAF1* | 0.386486997319581 | 1.17998E-10 |
| *SLC26A2* | -0.386480544 | 1.18089E-10 |
| *KIAA1522* | 0.386358266755139 | 1.19823E-10 |
| *BUB3* | 0.386241829532695 | 1.21497E-10 |
| *PTPRN2* | -0.386173888 | 1.22484E-10 |
| *KLF9* | -0.386156726 | 1.22735E-10 |
| *RBMS2* | -0.385935613 | 1.26009E-10 |
| *STAT3* | -0.385813697 | 1.2785E-10 |
| *HAUS1* | 0.38551740848907 | 1.32434E-10 |
| *TYRO3* | 0.38549527598199 | 1.32783E-10 |
| *HAUS5* | 0.38520777895881 | 1.37396E-10 |
| *EIF4EBP1* | 0.385102087216843 | 1.3913E-10 |
| *TRAP1* | 0.385078378332399 | 1.39522E-10 |
| *TOE1* | 0.384428101259078 | 1.50703E-10 |
| *SHE* | -0.384333843 | 1.52394E-10 |
| *PDE2A* | -0.38428841 | 1.53215E-10 |
| *FCHO2* | -0.383954554 | 1.59387E-10 |
| *GPR116* | -0.383744278 | 1.63397E-10 |
| *MRPL13* | 0.383132800604947 | 1.75625E-10 |
| *MUTYH* | 0.38291931390135 | 1.80099E-10 |
| *CCDC21* | 0.382903773603872 | 1.80429E-10 |
| *THOC6* | 0.382900911904474 | 1.8049E-10 |
| *APITD1* | 0.382353037057791 | 1.92511E-10 |
| *FAM54A* | 0.381893849537997 | 2.03182E-10 |
| *PHKB* | -0.381845629 | 2.04336E-10 |
| *FAM124B* | -0.381560682 | 2.11282E-10 |
| *SAE1* | 0.381158416749108 | 2.21481E-10 |
| *CARHSP1* | 0.380809187770134 | 2.30721E-10 |
| *RFTN2* | -0.380478826 | 2.39805E-10 |
| *STEAP4* | -0.379783721 | 2.60069E-10 |
| *RCC1* | 0.379736702281126 | 2.61498E-10 |
| *TIMM8A* | 0.379712869677823 | 2.62225E-10 |
| *TFDP1* | 0.379431573140564 | 2.70959E-10 |
| *ARL15* | -0.379329336 | 2.74203E-10 |
| *TRNAU1AP* | 0.379171977159639 | 2.79269E-10 |
| *PDCD4* | -0.379027219 | 2.84011E-10 |
| *EXOSC9* | 0.378511922098959 | 3.0153E-10 |
| *UBQLN4* | 0.378485888529043 | 3.02442E-10 |
| *POP1* | 0.378483193769069 | 3.02537E-10 |
| *C10orf26* | -0.378426187 | 3.04545E-10 |
| *PAFAH2* | -0.378124944 | 3.15371E-10 |
| *POLD2* | 0.377927247398355 | 3.22679E-10 |
| *C4orf12* | -0.377924253 | 3.22791E-10 |
| *NUBP2* | 0.377773500816632 | 3.28475E-10 |
| *ENO1* | 0.377557566383346 | 3.36787E-10 |
| *FGD4* | -0.377506939 | 3.38765E-10 |
| *C11orf84* | 0.376599387717303 | 3.76198E-10 |
| *C4orf46* | 0.376447605179232 | 3.82838E-10 |
| *HYLS1* | 0.376423083992203 | 3.83921E-10 |
| *PHACTR2* | -0.376399917 | 3.84948E-10 |
| *CCDC15* | 0.376292187439657 | 3.89755E-10 |
| *SFPQ* | 0.376274020852184 | 3.90572E-10 |
| *CXCR7* | -0.376084378 | 3.99194E-10 |
| *SLBP* | 0.37606174197568 | 4.00235E-10 |
| *TRIM46* | 0.375922260739817 | 4.06711E-10 |
| *C1S* | -0.375523203 | 4.25804E-10 |
| *C20orf72* | 0.375233696151548 | 4.40197E-10 |
| *PIK3C2B* | -0.375182542 | 4.42789E-10 |
| *ADPRHL2* | 0.375169943413202 | 4.4343E-10 |
| *SNHG10* | 0.375151227276421 | 4.44383E-10 |
| *SKA2* | 0.374549557530422 | 4.76111E-10 |
| *DDT* | 0.374544020464457 | 4.76413E-10 |
| *TOPBP1* | 0.37444095219674 | 4.82068E-10 |
| *GALC* | -0.374394592 | 4.84633E-10 |
| *UPF3B* | 0.374324011095243 | 4.88563E-10 |
| *TCOF1* | 0.374272770988964 | 4.91435E-10 |
| *TSTA3* | 0.373767755419287 | 5.20636E-10 |
| *FAM57B* | 0.373534450891212 | 5.34689E-10 |
| *NGB* | 0.373437153197646 | 5.40657E-10 |
| *SH3D19* | -0.373206562 | 5.55061E-10 |
| *DBF4B* | 0.373044880194681 | 5.65382E-10 |
| *GMDS* | 0.373042165259591 | 5.65557E-10 |
| *NOP56* | 0.373036290121417 | 5.65936E-10 |
| *TMUB1* | 0.372980153080678 | 5.69566E-10 |
| *GAPDH* | 0.372915257317893 | 5.73791E-10 |
| *CSTF2* | 0.372914801376569 | 5.73821E-10 |
| *POLR2K* | 0.372601329610291 | 5.94662E-10 |
| *PYCRL* | 0.372551781621849 | 5.98022E-10 |
| *MCM8* | 0.372440799404617 | 6.05617E-10 |
| *ZWILCH* | 0.372429238642113 | 6.06413E-10 |
| *MRPS23* | 0.372269425973027 | 6.17528E-10 |
| *SERPING1* | -0.372080663 | 6.3091E-10 |
| *MSH6* | 0.372079170861229 | 6.31017E-10 |
| *C3orf26* | 0.372055610746406 | 6.32707E-10 |
| *CBX2* | 0.372055034087284 | 6.32749E-10 |
| *ZBTB8B* | 0.372041141597614 | 6.33748E-10 |
| *CDH5* | -0.3720102 | 6.35978E-10 |
| *DHDH* | 0.371988408632037 | 6.37553E-10 |
| *DDTL* | 0.371944459686744 | 6.40741E-10 |
| *ZNF367* | 0.371377958525151 | 6.83246E-10 |
| *VWF* | -0.371255214 | 6.9281E-10 |
| *RAB1A* | -0.37073055 | 7.35174E-10 |
| *KIDINS220* | -0.370471138 | 7.57038E-10 |
| *KLHDC1* | -0.370432777 | 7.60324E-10 |
[truncated: 356,298 more chars]
